# Supplementary material for: Consequences of Amide Connectivity in the Supramolecular Polymerization of Porphyrins: Spectroscopic Observations Rationalized by Theoretical Modelling
Source: PubMed Central journal article supplement (PMC8362183; doi:10.1002/chem.202101036), 2021-05-27
Supplement: CHEM-27-9700-s001.pdf [file CHEM-27-9700-s001.pdf]

# Chemistry–A European Journal

Supporting Information

## **Consequences of Amide Connectivity in the Supramolecular Polymerization of Porphyrins: Spectroscopic Observations Rationalized by Theoretical Modelling**

Elisabeth Weyandt, Ivo A. W. Filot, Ghislaine Vantomme, and E. W. Meijer\*

## Table of Contents

|                                                                 |    |
|-----------------------------------------------------------------|----|
| 1. Materials and methods: .....                                 | 3  |
| 1.1 Materials .....                                             | 3  |
| 1.2 Characterization.....                                       | 3  |
| 1.3 Spectroscopy.....                                           | 3  |
| 1.4 Sample preparation .....                                    | 3  |
| 2. Synthesis .....                                              | 4  |
| 2.1 Synthesis of N-centered ligand <b>2-FB</b> .....            | 4  |
| 2.2 Synthesis of N-centered porphyrin monomer <b>2-Zn</b> ..... | 5  |
| 3. Fourier-Transform Infrared Spectroscopy .....                | 6  |
| 4. Dynamic Scanning Calorimetry (DSC).....                      | 8  |
| 5. Assembly of 1-Zn and 2-Zn in apolar solvents.....            | 9  |
| 5.1 Assembly of free base ligands in apolar solvents.....       | 9  |
| 5.2 Emission spectra of <b>1-Zn</b> and <b>2-Zn</b> .....       | 10 |
| 5.3 Copolymerization of <b>1-Zn</b> and <b>2-Zn</b> .....       | 11 |
| 6. Atomic force microscopy .....                                | 13 |
| 7. Density functional theory calculations of monomers .....     | 14 |
| 8. Spectra of Compounds: .....                                  | 18 |
| 8.1 <sup>1</sup> H NMR spectra:.....                            | 18 |
| 8.2 <sup>13</sup> C and 2D NMR spectra: .....                   | 19 |
| 8.3 MALDI-TOF:.....                                             | 22 |
| 9. References .....                                             | 23 |
| 10. Appendix: DFT coordinates.....                              | 24 |

## 1. Materials and methods:

### 1.1 Materials

Unless stated otherwise, reagents and solvents were obtained from commercial sources and used without further purification. All solvents were of AR grade or of spectrophotometric grade, when used in spectroscopy experiments. Reactions were conducted under argon atmosphere and in dried glassware unless noted otherwise. Flash column chromatography was done on a Biotage Isolera One system with an ultraviolet detector.

### 1.2 Characterization

MALDI-TOF mass spectra were measured using a PerSeptive Biosystem Voyager-DE PRO spectrometer using either  $\alpha$ -cyano-4-hydroxycinnamic acid (CHCA) or 2-[(2E)-3-(4-tert-butylphenyl)-2-methylprop-2-enylidene]malononitrile (DCTB) as matrices. IR spectra were obtained on a Perkin-Elmer spectrum two FT-IR spectrometer. Atomic force microscopy (AFM) experiments were performed on an Asylum MFP3 system with Olympus AC240 tips in tapping mode. Image analysis for AFM was done with Gwyddion software version 2.50. Mica sheets used in the experiment were of V1-grade and freshly cleaved before dropcasting the solutions.

### 1.3 Spectroscopy

UV/Vis and circular dichroism (CD) spectra were recorded on a Jasco J-815 spectropolarimeter with a Jasco PFD-425S/15 Peltier. The measurement parameters for sensitivity, scanning rates and ranges were chosen appropriately for each experiment. Cuvette cells with an optical path length of either 1 mm or 1 cm were used for all experiments.

### 1.4 Sample preparation

Stock solutions (100  $\mu$ M) were prepared by weighing the compound into a vial and adding the appropriate amount of solvent. One milliliter of a polar solvent (dichloromethane or chloroform) was added to break up aggregates and re-evaporated. Then methylcyclohexane (MCH) was added, heated with a heat gun and sonicated until complete dissolution. Samples for measurements were prepared by diluting the stock solution to the respective concentration. The molar dichroism  $\Delta\epsilon$  was calculated as  $\Delta\epsilon = \text{CD effect} / (c \cdot l)$ , with the concentration  $c$  ( $\text{mol} \cdot \text{L}^{-1}$ ) and the optical path length  $l$  (cm).

## 2. Synthesis

The synthesis of (*S*)-3,7-dimethyloctyl functionalized acid **3**, free base ligand **1-FB** and zinc porphyrin **1-Zn** has been published previously.<sup>1</sup> The synthesis of **2-FB** was adapted from literature.<sup>2</sup> Tetra-4-aminophenyl porphyrin was purchased from PorphyrChem and used without further purification.

### 2.1 Synthesis of *N*-centered ligand **2-FB**

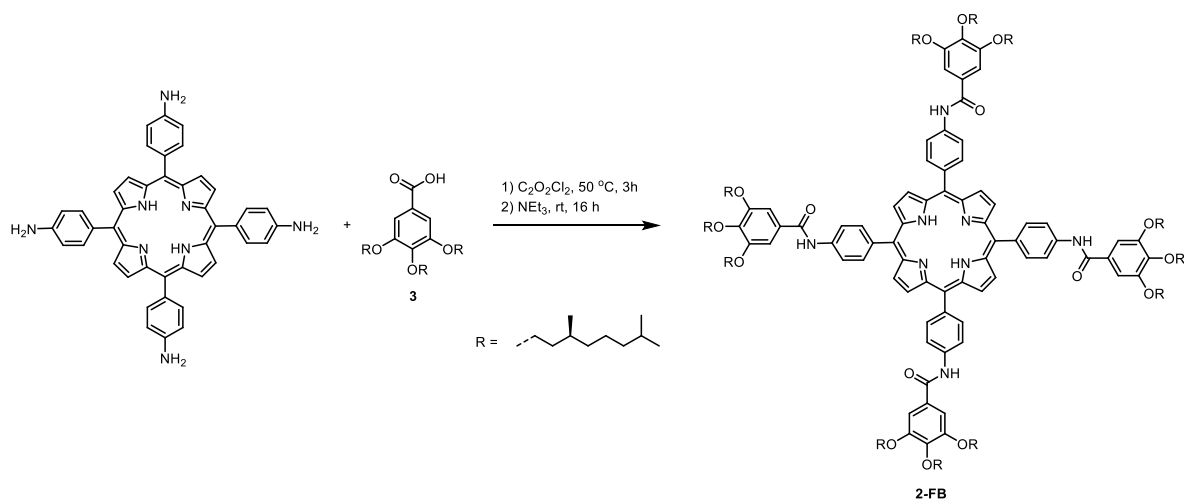

**Scheme S1:** Synthesis of *N*-centered free base porphyrin ligand **2-FB**.

Triple side chain functionalized acid **3** (650 mg, 1.1 mmol) was converted to the acid chloride by addition of oxalyl chloride (850 mg, 6.67 mmol) and refluxing for three hours. Due to the instability of the acid chloride it was immediately used for the next step without isolation. Tetra-4-aminophenyl porphyrin (150 mg, 0.22 mmol) was suspended together with the freshly prepared acid chloride in 100 mL dry chloroform with 1.5 mL triethylamine ( $\text{NEt}_3$ ) and stirred overnight with protection from light. The dark red reaction mixture was extracted with 2 x 50 mL of water and 1 x 50 mL of 0.5 M hydrochloric acid solution. The combined organic phases were dried over  $\text{MgSO}_4$ , filtered and the solvent removed in vacuo. The product was purified by column chromatography (Biotage®, gradient of EtOAc/ $\text{CHCl}_3$ /heptane in the ratio of 2:4:4). The product was precipitated from 5% chloroform in MeOH and isolated as a dark red powder (456 mg, yield: 69%).

$^1\text{H}$  NMR (400 MHz,  $\text{CDCl}_3$ )  $\delta$  8.92 (s, 8H), 8.24 (d,  $J = 8.3$  Hz, 9H), 8.09 – 8.02 (m, 12H), 7.24 (d,  $J = 8.9$  Hz, 8H), 4.15 (m, 24H), 1.91 (m, 9H), 1.81 – 1.58 (m, 24H), 1.46 – 1.08 (m, 38H), 0.99 (m, 37H), 0.89 (d,  $J = 6.6$  Hz, 87H), -2.74 (s, 2H).  $^{13}\text{C}$  NMR (101 MHz,  $\text{CDCl}_3$ )  $\delta$  171.24, 166.19, 161.18, 153.59, 141.91, 138.45, 137.96, 135.35, 130.16, 119.73, 118.54, 106.09, 72.04, 68.05, 39.54, 39.45, 37.69, 37.54, 36.58, 30.05, 29.86, 28.17, 24.93, 24.90, 22.89, 22.80, 22.78, 19.79, 19.76. MALDI-TOF MS:  $[\text{M}^+]$  calcd. for  $\text{C}_{192}\text{H}_{290}\text{N}_8\text{O}_{16}$ : 2964.21, found 2966.27. IR ( $\text{cm}^{-1}$ ): 3316, 2953, 2925, 2869, 1677, 1648, 1582, 1517, 1492, 1468, 1426, 1383, 1365, 1330, 1234, 1205, 1111, 998, 966, 851, 800, 754, 734.

## 2.2 Synthesis of N-centered porphyrin monomer 2-Zn

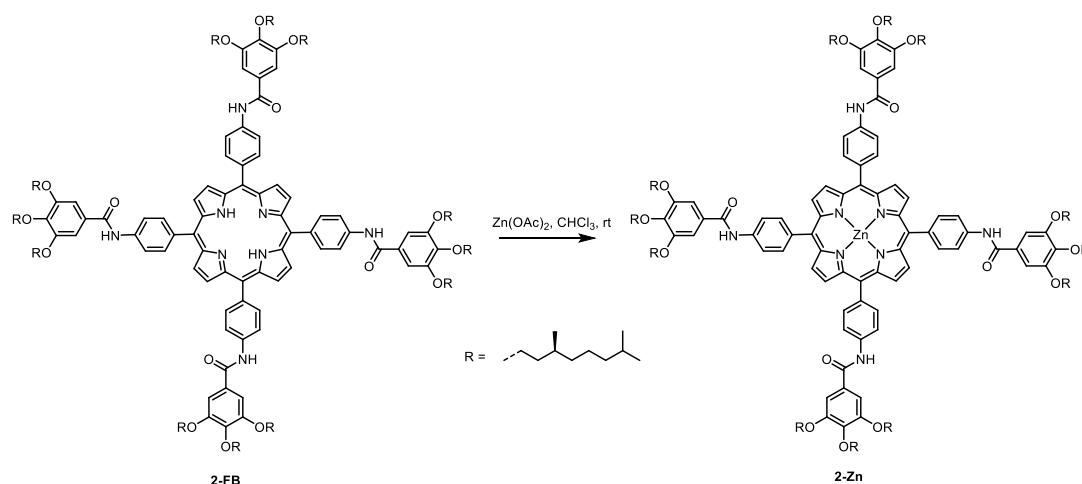

**Scheme S2:** Synthesis of **2-Zn** by zinc insertion into **2-FB**.

The ligand **2-FB** (250 mg, 0.85 mmol) was dissolved in 100 mL DCM and stirred together with  $\text{Zn(OAc)}_2$  (170 mg, 1.26 mmol) overnight at room temperature with protection from light. The resulting purple reaction mixture was extracted with 2 x 50 mL of water, dried over  $\text{MgSO}_4$ , filtered and the solvent removed in vacuo. After purification by column chromatography (Biotage®, EtOAc/ $\text{CHCl}_3$ /Heptane in the ratio of 2:4:4) and precipitation from 5%  $\text{CHCl}_3$  in MeOH the product was obtained as a purple, metallic shimmering powder (214 mg, yield: 84%).

$^1\text{H}$  NMR (399 MHz,  $\text{CDCl}_3$ )  $\delta$  9.01 (s, 8H), 8.29 – 8.15 (m, 12H), 8.01 (d,  $J$  = 8.3 Hz, 8H), 7.17 (d,  $J$  = 15.1 Hz, 8H), 4.16 – 4.03 (m, 31H), 2.00 – 1.83 (m, 9H), 1.73 (ddq,  $J$  = 33.1, 14.2, 7.7 Hz, 13H), 1.56 (tdd,  $J$  = 13.0, 9.5, 7.0 Hz, 16H), 1.45 – 1.09 (m, 118H), 0.99 (t,  $J$  = 7.0 Hz, 31H), 0.90 (dd,  $J$  = 6.7, 3.3 Hz, 92H).  $^{13}\text{C}$  NMR (100 MHz,  $\text{CDCl}_3$ )  $\delta$  166.21, 153.52, 153.49, 150.41, 141.82, 139.27, 137.69, 135.21, 132.12, 130.11, 120.56, 118.40, 106.08, 73.77, 72.00, 69.67, 67.98, 39.54, 39.49, 39.45, 37.69, 37.54, 37.25, 36.58, 32.91, 32.11, 32.08, 30.54, 30.19, 30.04, 29.93, 29.92, 29.87, 29.86, 29.83, 29.78, 29.61, 29.57, 29.53, 29.39, 28.16, 28.13, 27.24, 26.29, 24.93, 24.90, 22.87, 22.84, 22.79, 22.77, 19.88, 19.77, 19.75, 14.27, 14.21. MALDI-TOF MS:  $[\text{M}^+]$  calcd. for  $\text{C}_{192}\text{H}_{288}\text{N}_8\text{O}_{16}\text{Zn}$ : 3026.13, found 3029.11. IR ( $\text{cm}^{-1}$ ): 3299, 2958, 2925, 2868, 1648, 1582, 1526, 1493, 1467, 1426, 1383, 1365, 1333, 1234, 1204, 1182, 1113, 999, 854, 812, 797, 753, 676, 571.

### 3. Fourier-Transform Infrared Spectroscopy

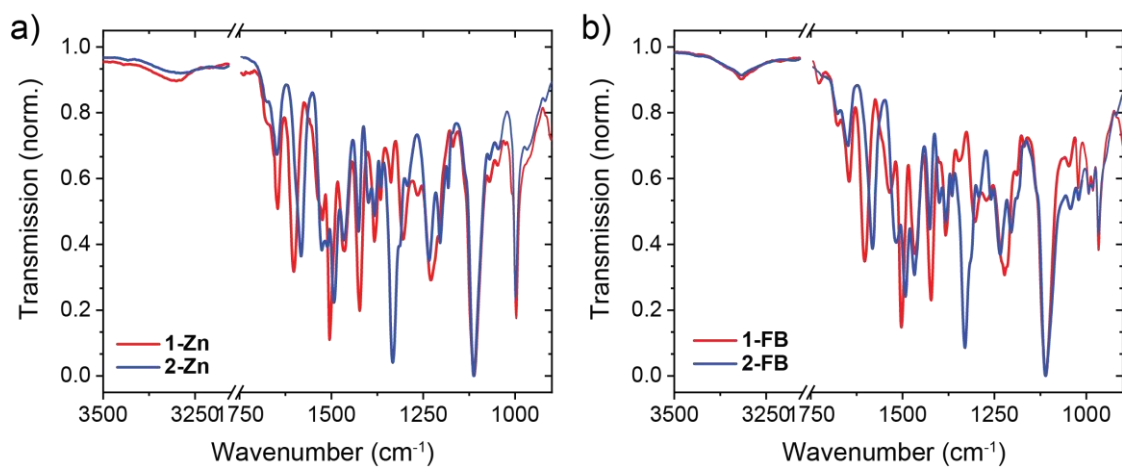

**Figure S1:** FT-IR spectra of zinc centered (a) and free base (b) ligands **1** and **2**.

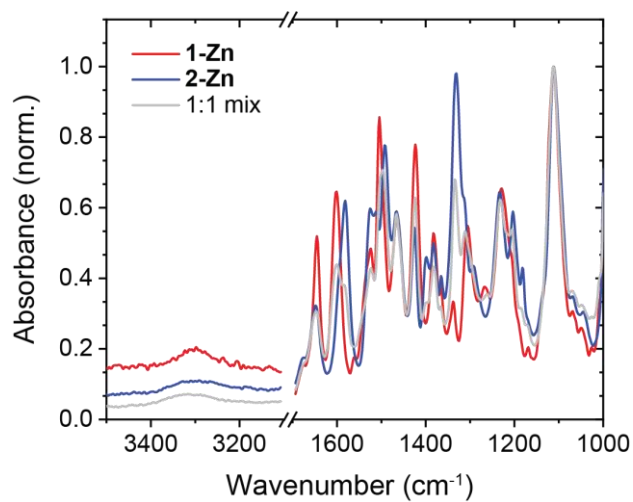

**Figure S2:** FT-IR spectra of **1**- and **2**-Zn and a 1:1 mixture. The mixture was prepared by dissolving both monomers together in a good solvent (chloroform) and letting the solvent evaporate slowly.

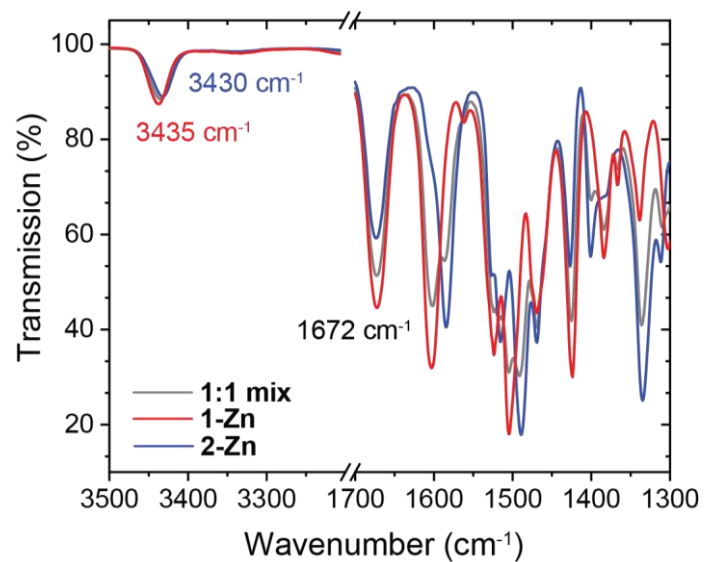

**Figure S3:** FT-IR spectra of 2 mM solutions of **1-** and **2-Zn** and a 1:1 mixture of both in chloroform. Both porphyrins exhibit a NH stretch of similar intensity at around 3430-3435 cm<sup>-1</sup>, indicative of non-hydrogen bonded NH groups.

#### 4. Dynamic Scanning Calorimetry (DSC)

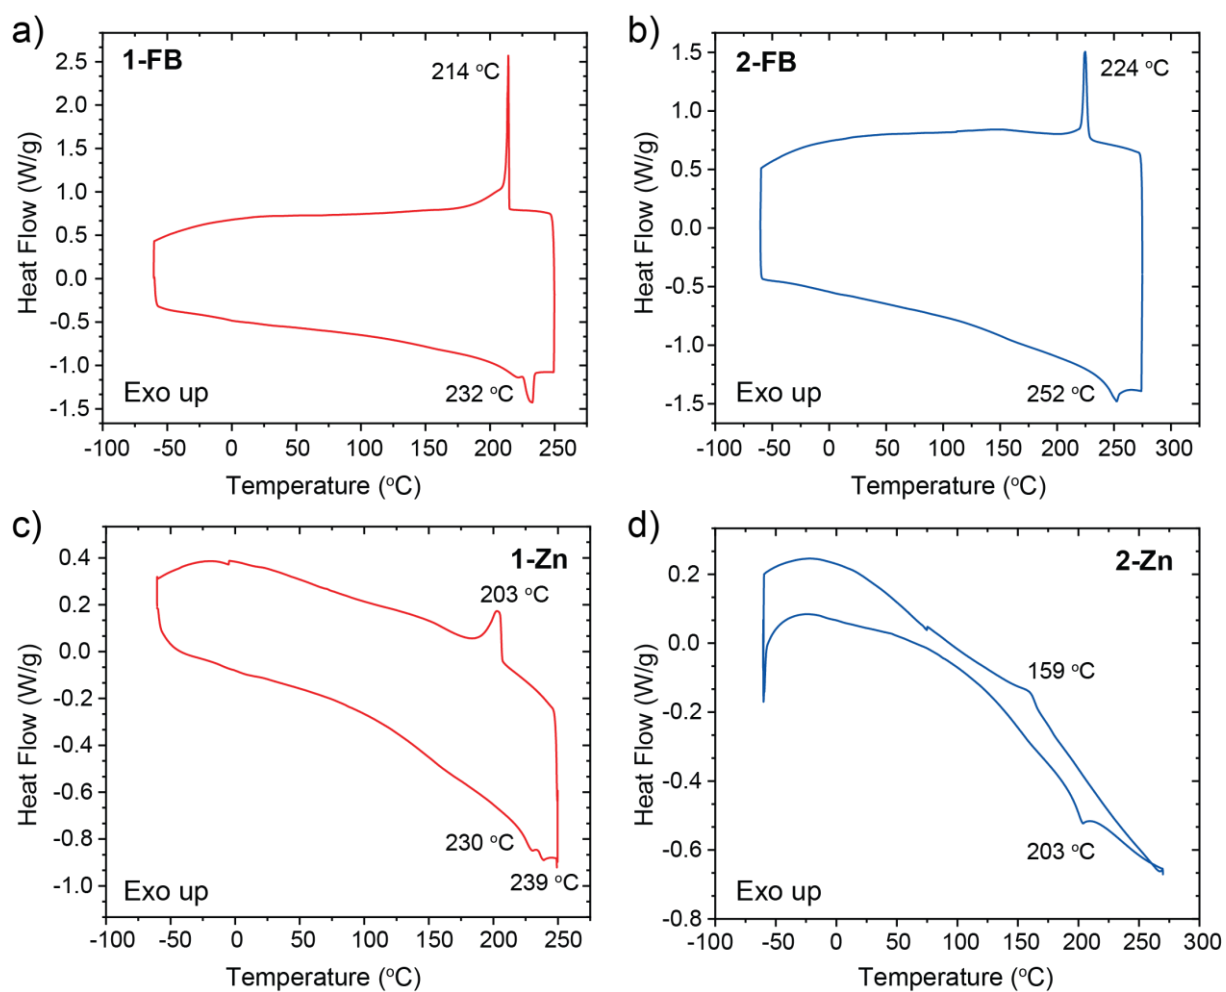

**Figure S4:** DSC graphs of free base (a, b) and zinc centered (c, d) ligands **1** and **2** with transition temperatures indicated in the plots. Data taken from the second heating/cooling run with a ramping rate of 10 °C/min.



## 5. Assembly of 1-Zn and 2-Zn in apolar solvents

### 5.1 Assembly of free base ligands in apolar solvents

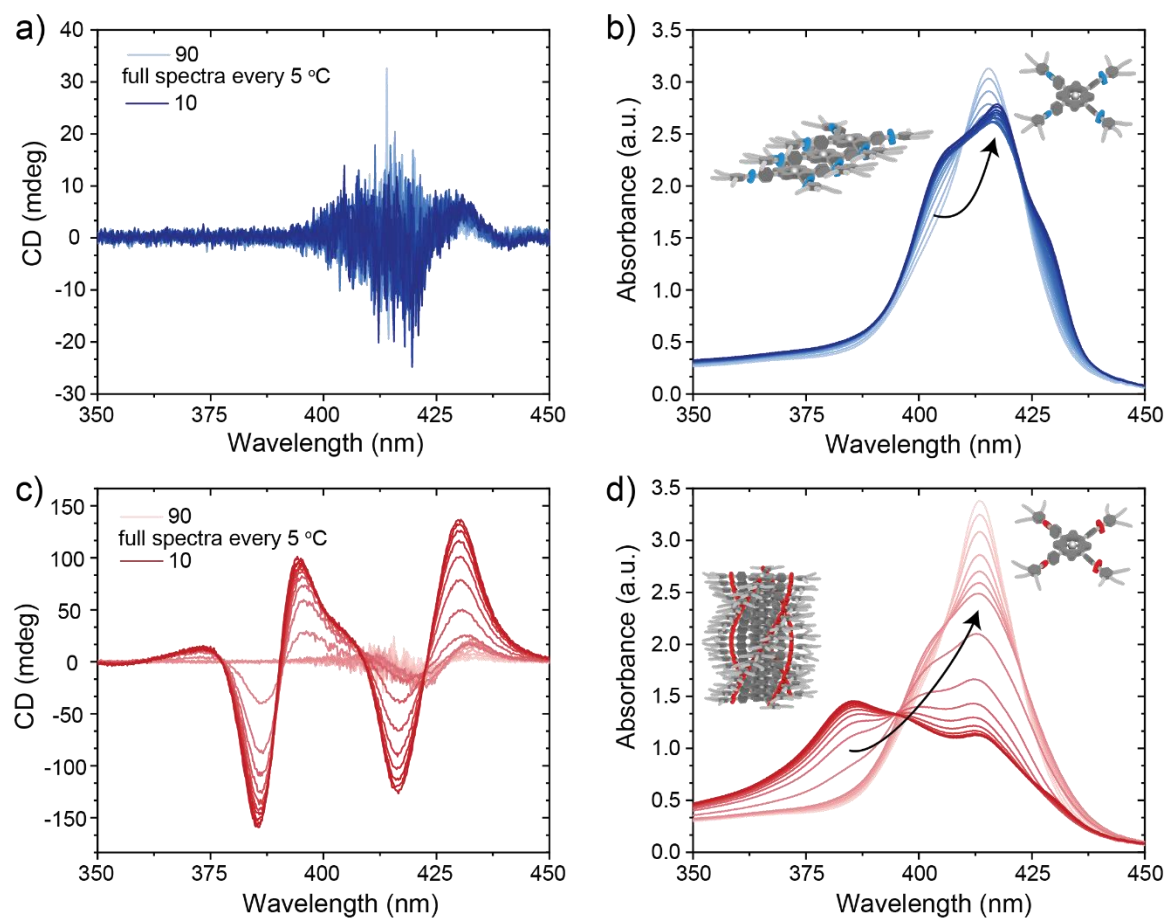

**Figure S5:** Full CD (a, c) and absorbance (b, d) spectra of free base monomers **1-FB** and **2-FB** ( $c = 50 \mu\text{M}$  in MCH) measured in intervals of  $5 \text{ }^\circ\text{C}$  from  $90\text{-}20 \text{ }^\circ\text{C}$  with a cooling rate of  $1 \text{ }^\circ\text{C}/\text{min}$ .

## 5.2 Emission spectra of 1-Zn and 2-Zn

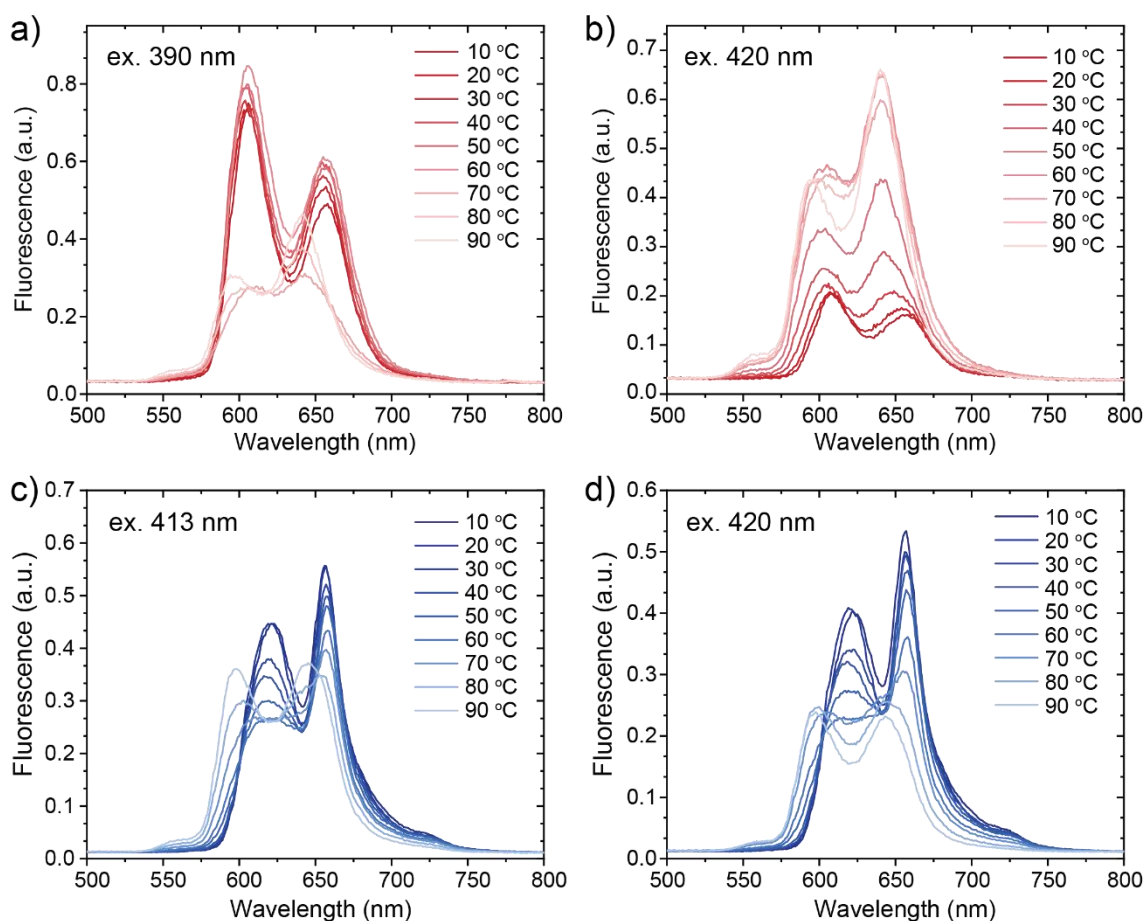

**Figure S6:** Emission spectra of **1-Zn** (a, b) and **2-Zn** (c, d) with respective excitation wavelengths noted in the plots ( $c = 10 \mu\text{M}$ ,  $l = 10 \text{ mm}$ ). For both monomers the biggest absorbance peak at 20 and 90 °C were excited as emission properties are dependent on aggregation states. Detector sensitivity was set to 800 mV for **1-Zn** and to 700 mV for the more emissive **2-Zn**.

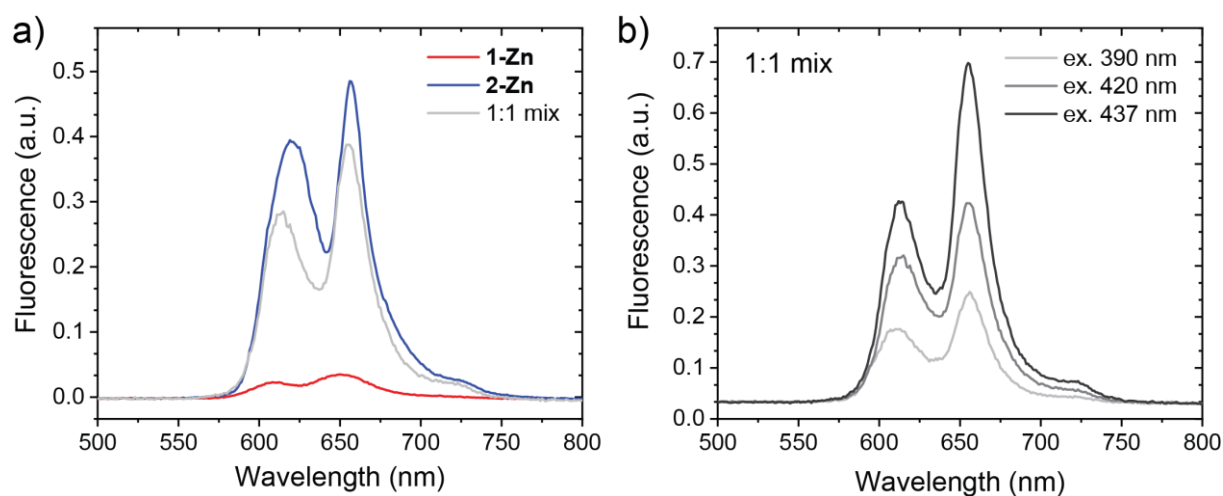

**Figure S7:** Emission spectra of a 1:1 mixture of **1-** and **2-Zn** ( $c = 10 \mu\text{M}$  of each). a) Comparison of emission of the pure polymers and a 1:1 mixture thereof (ex. 420 nm). b) Fluorescence intensity of the 1:1 mix plotted for excitation wavelength of 390 (H-aggregate), 420 (J-aggregate) and 437 nm (new co-aggregate). Detector sensitivity was set to 700 mV in all cases.

### 5.3 Copolymerization of 1-Zn and 2-Zn

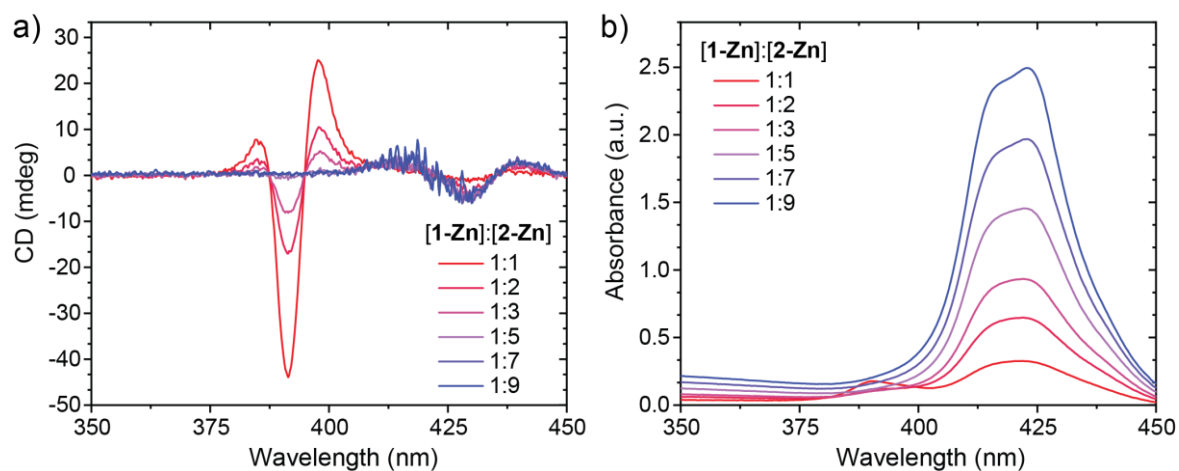

**Figure S8:** Spectral changes with increasing molar ratios of 2-Zn. Concentration of 1-Zn was kept constant at  $c = 10 \mu\text{M}$  in MCH.

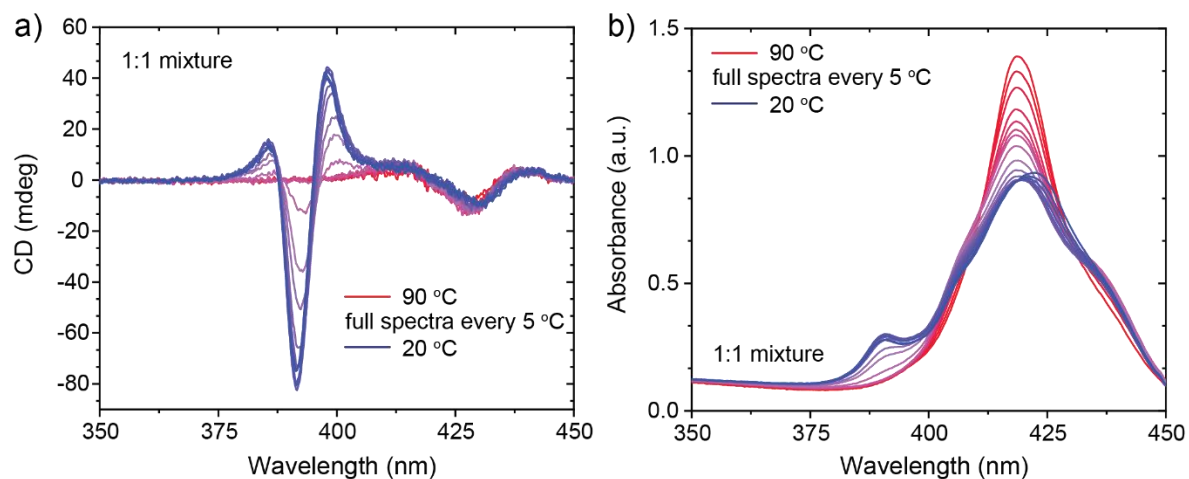

**Figure S9:** Full CD (a) and absorbance (b) spectra of a 1:1 mixture of 1-Zn and 2-Zn ( $c = 50 \mu\text{M}$  in MCH) measured in intervals of 5 °C from 90-20 °C with a cooling rate of 1 °C/min.

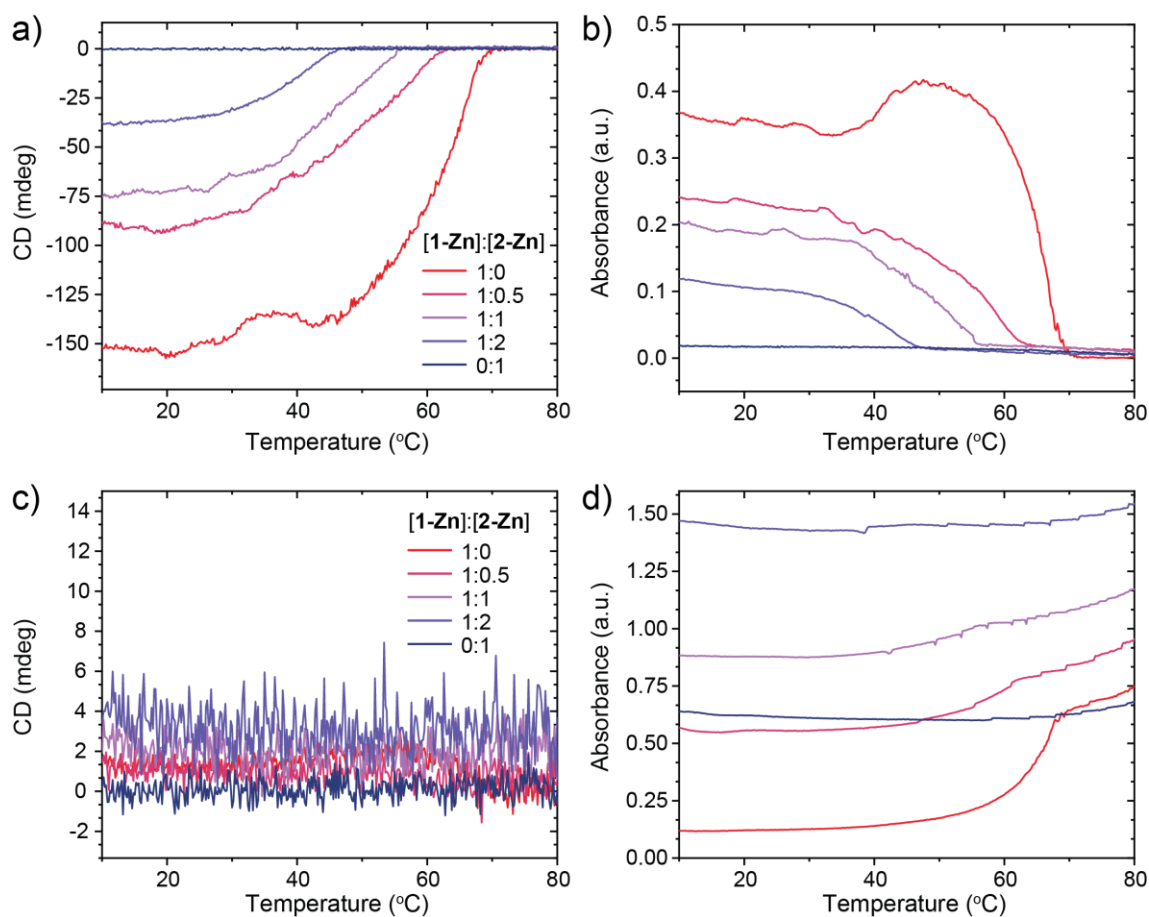

**Figure S10:** Melting curves of **1-Zn** and **2-Zn** and their mixtures followed by CD and UV at 390 nm (H-aggregate; a, b) and at 420 nm (J-aggregate plus monomer; c, d). The concentration of **1-Zn** and **2-Zn** was set to  $c = 25 \mu\text{M}$  in MCH, for mixtures in the respective ratios the concentration of **1-Zn** was kept constant at  $c_{1\text{-zn}} = 25 \mu\text{M}$  and aliquots of **2-Zn** were added to exclude dilution effects. Cooling rate was  $1 \text{ }^\circ\text{C}/\text{min}$ .

**Table S1:** Temperatures of elongation ( $T_e$ ) for homo- and copolymerization mixtures of **1-Zn** and **2-Zn**. Temperatures were taken from CD melting curves followed at 390 nm with a cooling rate of  $1 \text{ }^\circ\text{C}/\text{min}$  ( $c_{1\text{-zn}} = 25 \mu\text{M}$  for pure samples and mixtures,  $c_{2\text{-zn}} = 25 \mu\text{M}$  for pure sample).

| sample            | $T_e$ [ $^\circ\text{C}$ ] |
|-------------------|----------------------------|
| <b>1-Zn</b> (1:0) | 69                         |
| 1:0.5             | 62                         |
| 1:1               | 55                         |
| 1:2               | 46                         |
| <b>2-Zn</b> (0:1) | -                          |

## 6. Atomic force microscopy

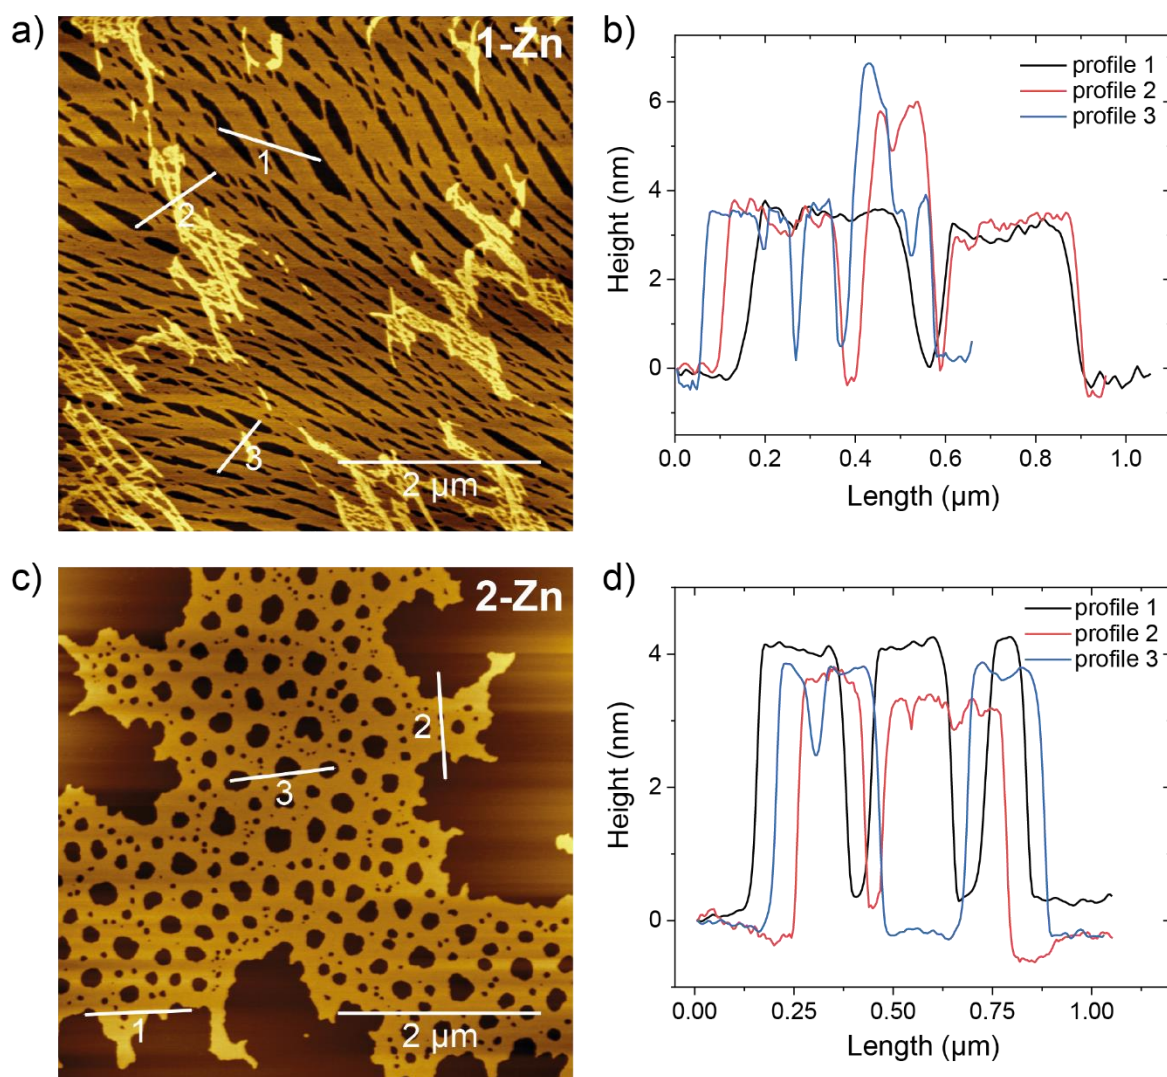

**Figure S11:** AFM images of **1-Zn** and **2-Zn** dropcasted from  $c = 20 \mu\text{M}$  solutions in MCH on mica. For **1-Zn** (a) bundled supramolecular fibers were found while for **2-Zn** (c) only disordered deposits were observed. Height profiles of b) **1-Zn** and d) **2-Zn** shows structures of 3-4 nm thickness in both cases.

## 7. Density functional theory calculations of monomers

All DFT calculations were performed using the Vienna Ab Initio Simulation Package (VASP).<sup>3–6</sup> The Perdew–Burke–Ernzerhof (PBE) exchange-correlation functional<sup>7,8</sup> was used in conjunction with the projector augmented wave approach.<sup>9,10</sup> All structures were optimized to their local minima using the conjugate gradient algorithm as implemented in VASP. Optimization and other electronic settings are given below.

### Settings

| Parameter                        | INCAR setting | value                 |
|----------------------------------|---------------|-----------------------|
| Cutoff energy                    | ENCUT         | 500                   |
| Precision                        | PREC          | High                  |
| Smearing type                    | ISMEAR        | 0 (Gaussian smearing) |
| Smearing width                   | SIGMA         | 0.0005                |
| Electronic convergence threshold | EDIFF         | 1E-5                  |
| Ionic relaxation threshold       | EDIFFG        | 1E-4                  |

### K-point grid

For all calculations, only the  $\Gamma$ -point was used.

### Geometries

Below, the geometries of the optimized structures are given. These geometries are represented as POSCAR/CONTCAR files. Further information with regard to the structure of these files is provided in the link below: <http://cms.mpi.univie.ac.at/vasp/guide/node59.html>.



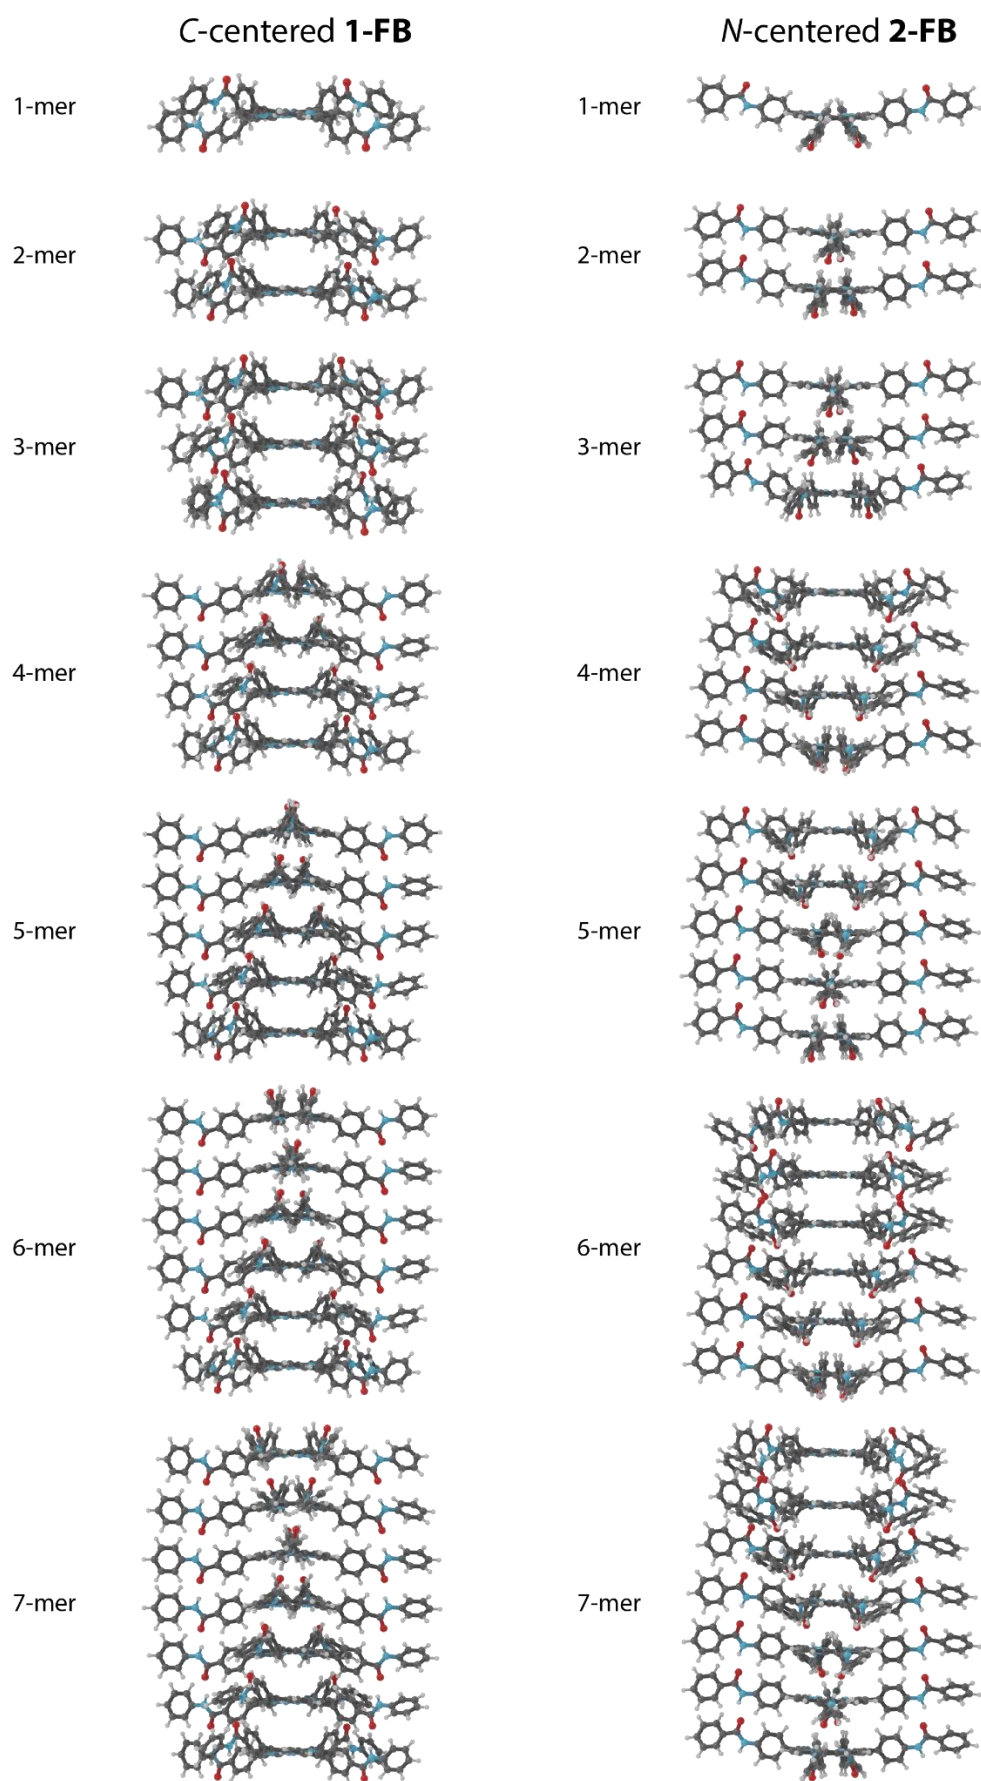

**Figure S12:** Images of optimized structures of mono- up to heptamers of C- and N-centered ligands.

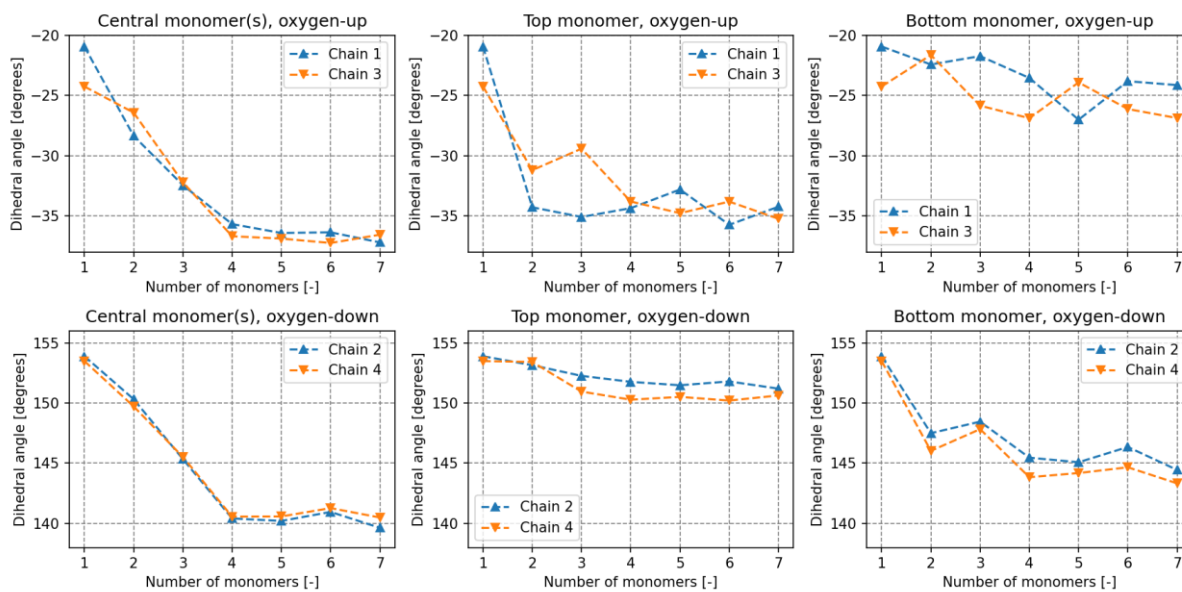

Figure S13: Dihedral angles of **1-FB** monomers in the stacks oriented either oxygen up or down.

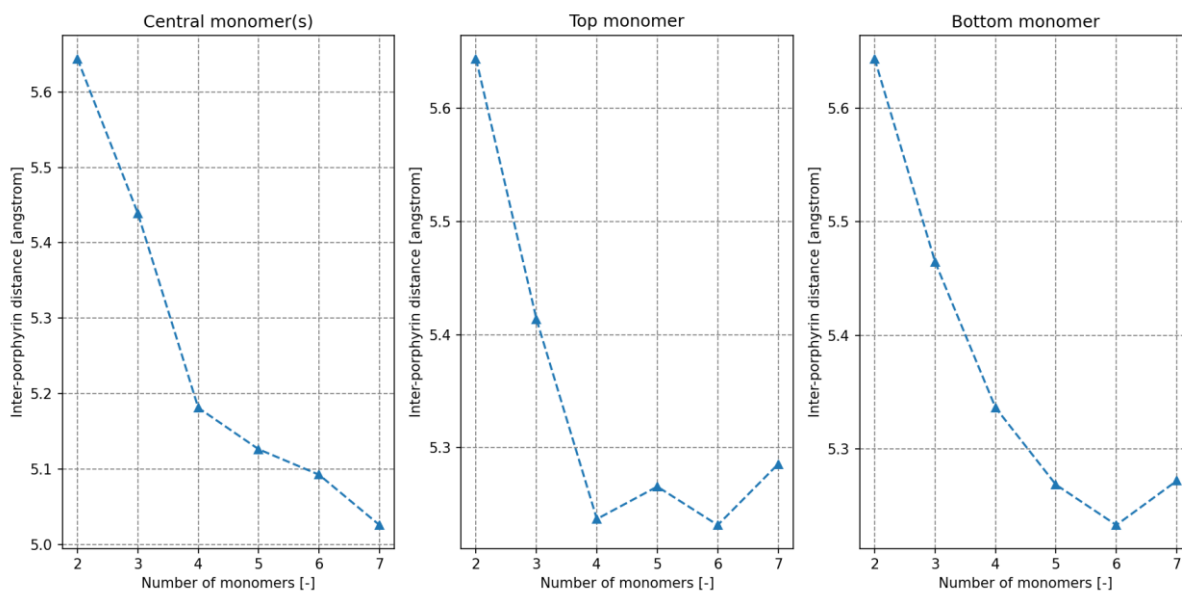

Figure S14: Distance between central, top or bottom monomers in the **1-FB** stack.



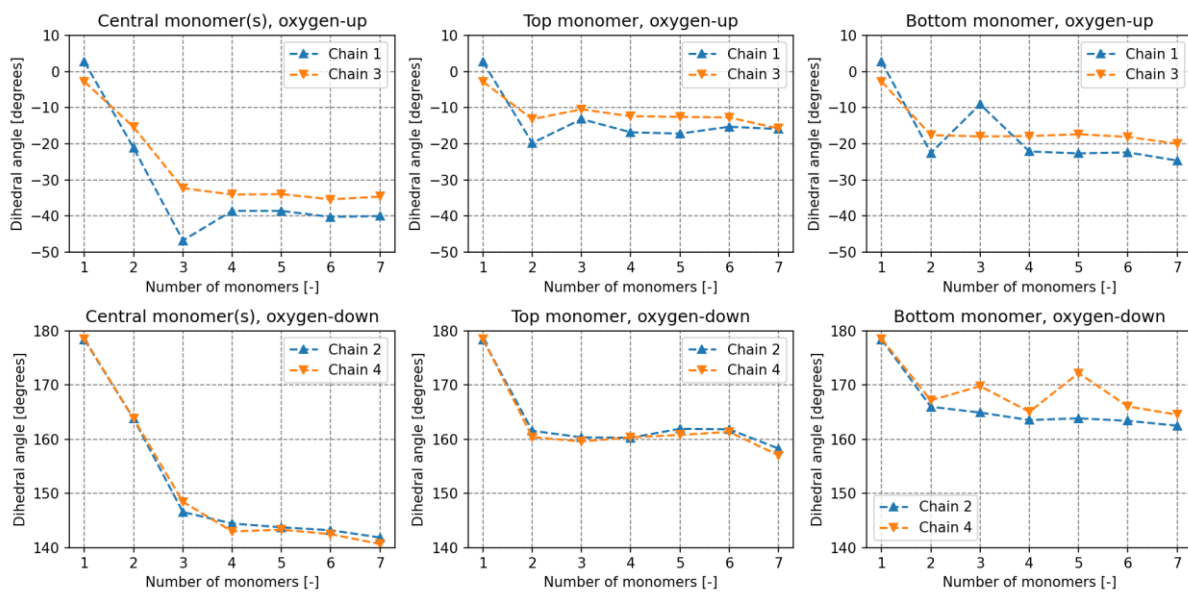

Figure S15: Dihedral angles of 2-FB monomers in the stacks oriented either oxygen up or down.

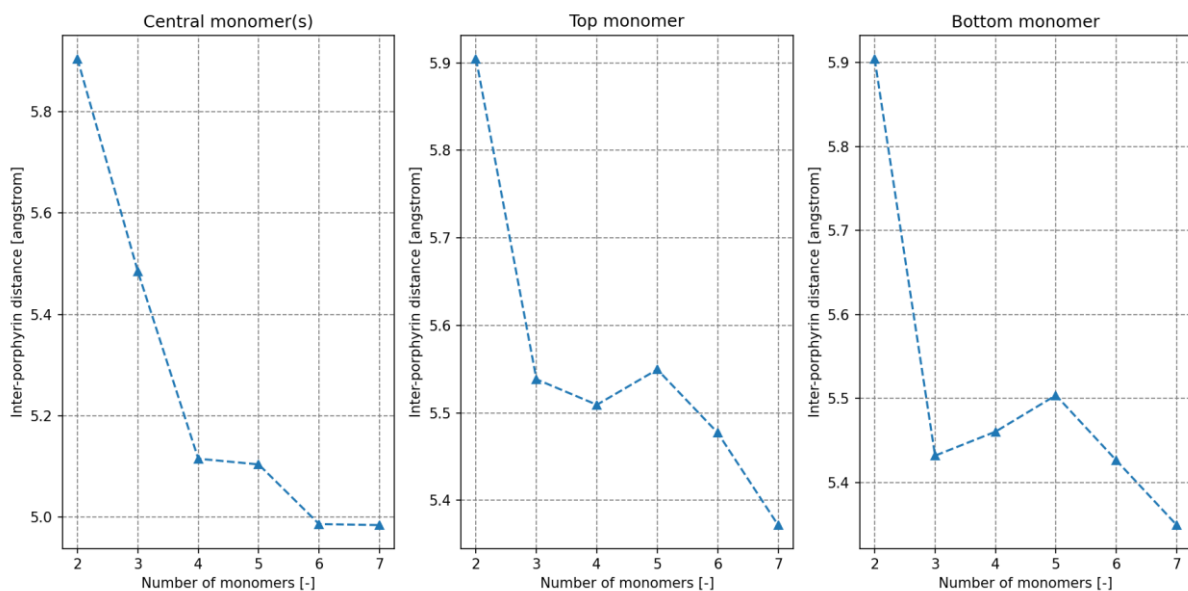

Figure S16: Distance between central, top or bottom monomers in the 2-FB stack.

## 8. Spectra of Compounds:

### 8.1 $^1\text{H}$ NMR spectra:

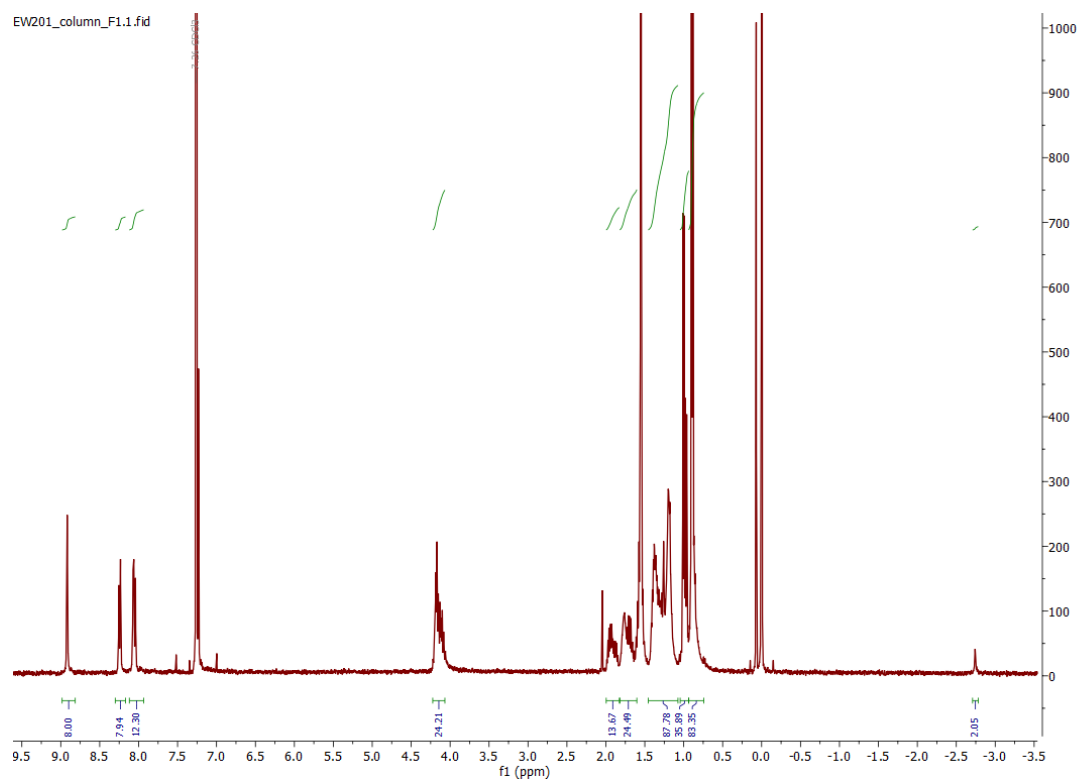

Figure S17:  $^1\text{H}$  NMR spectrum of 2-FB in chloroform- $d$ .

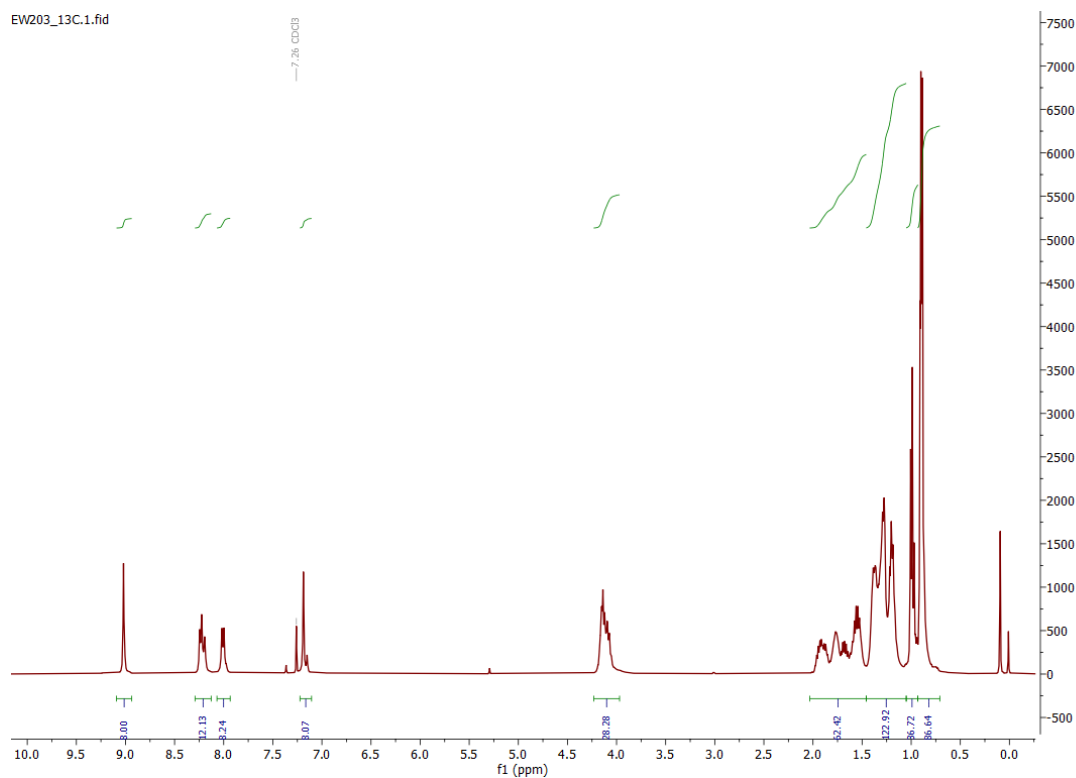

Figure S18:  $^1\text{H}$  NMR spectrum of 2-Zn in chloroform- $d$ .

## 8.2 $^{13}\text{C}$ and 2D NMR spectra:

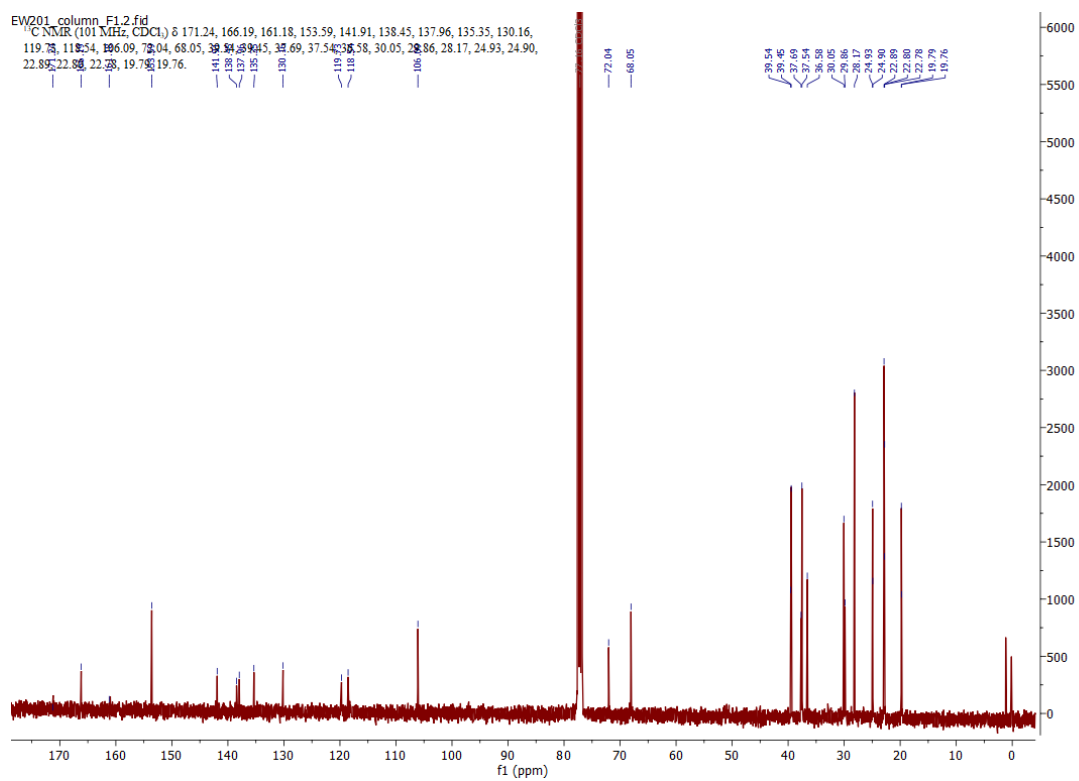

Figure S19:  $^{13}\text{C}$  NMR spectrum of **2-FB** in chloroform-*d*.

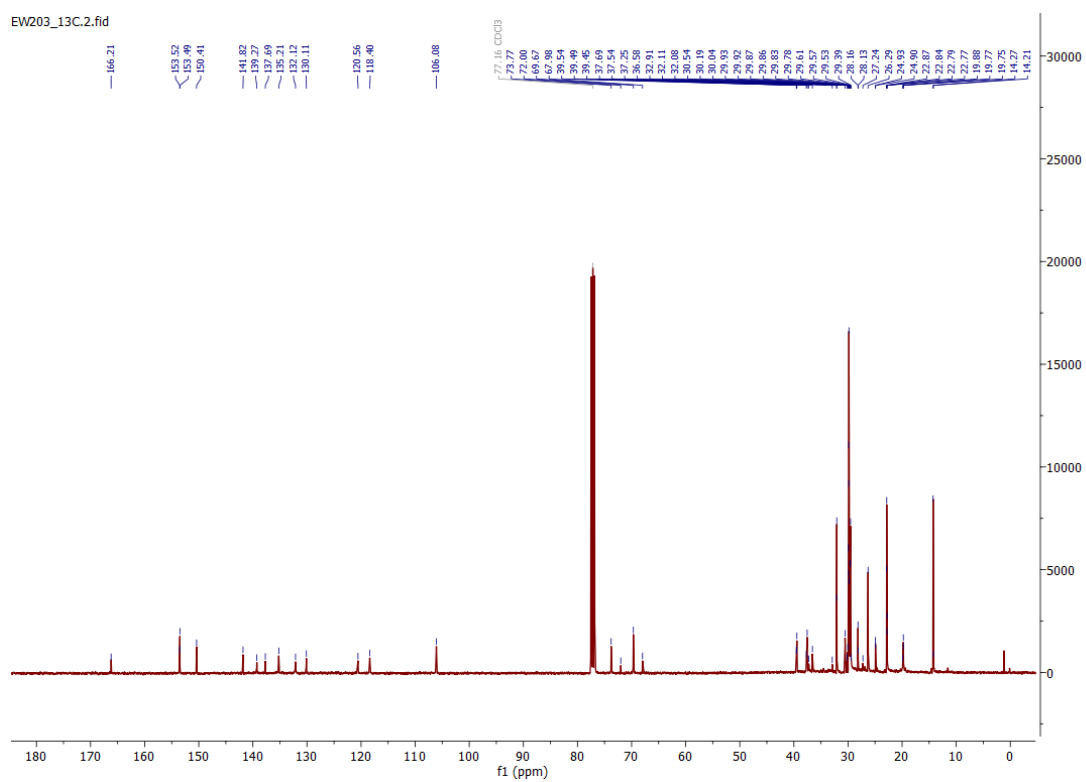

Figure S20:  $^{13}\text{C}$  NMR spectrum of **2-Zn** in chloroform-*d*.

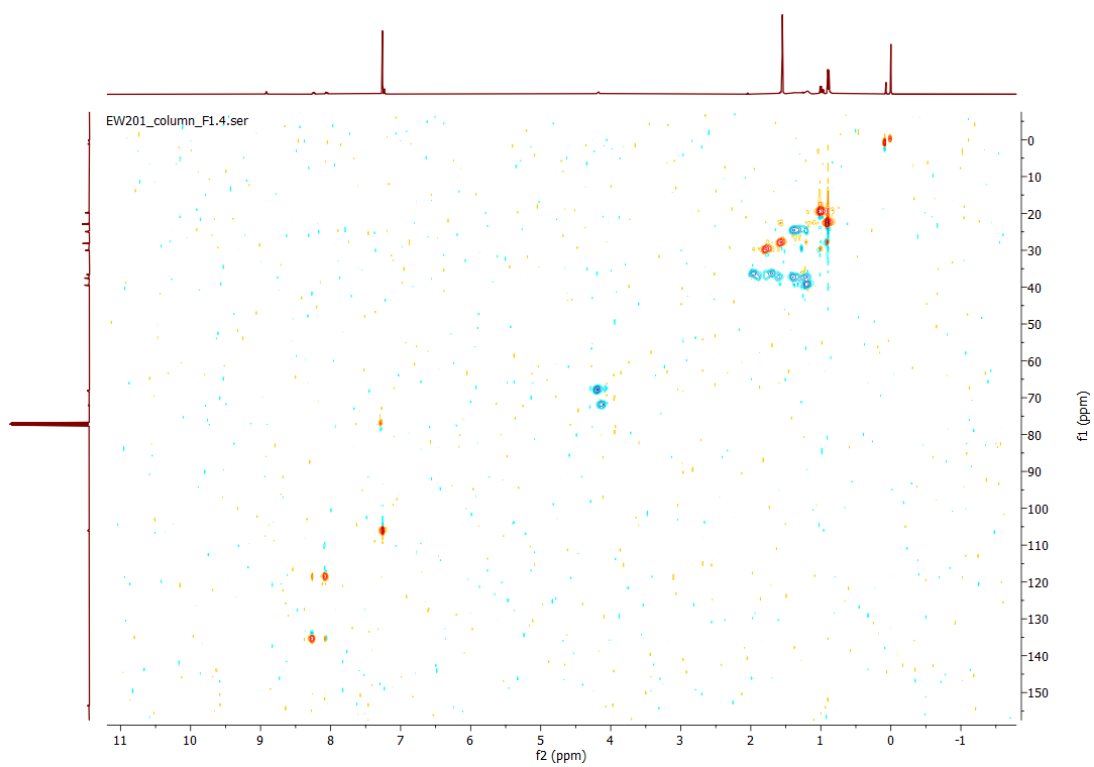

Figure S21: COSY NMR of 2-FB in chloroform-*d*.

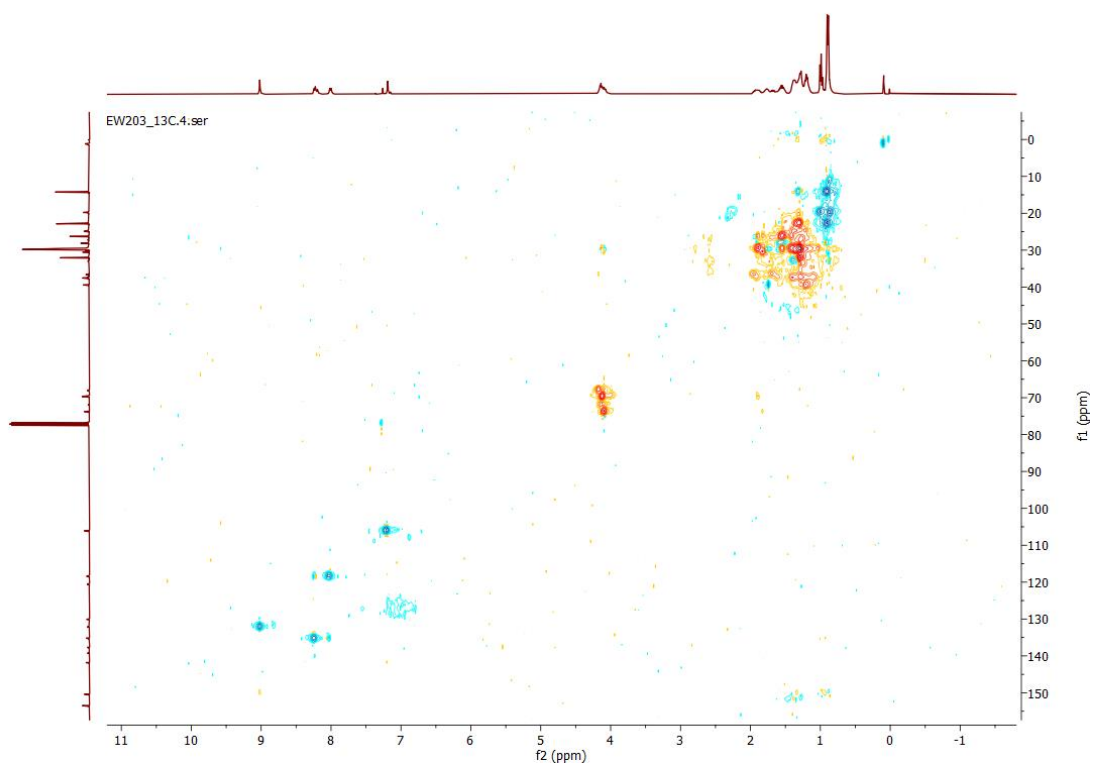

Figure S22: COSY NMR of 2-Zn in chloroform-*d*.

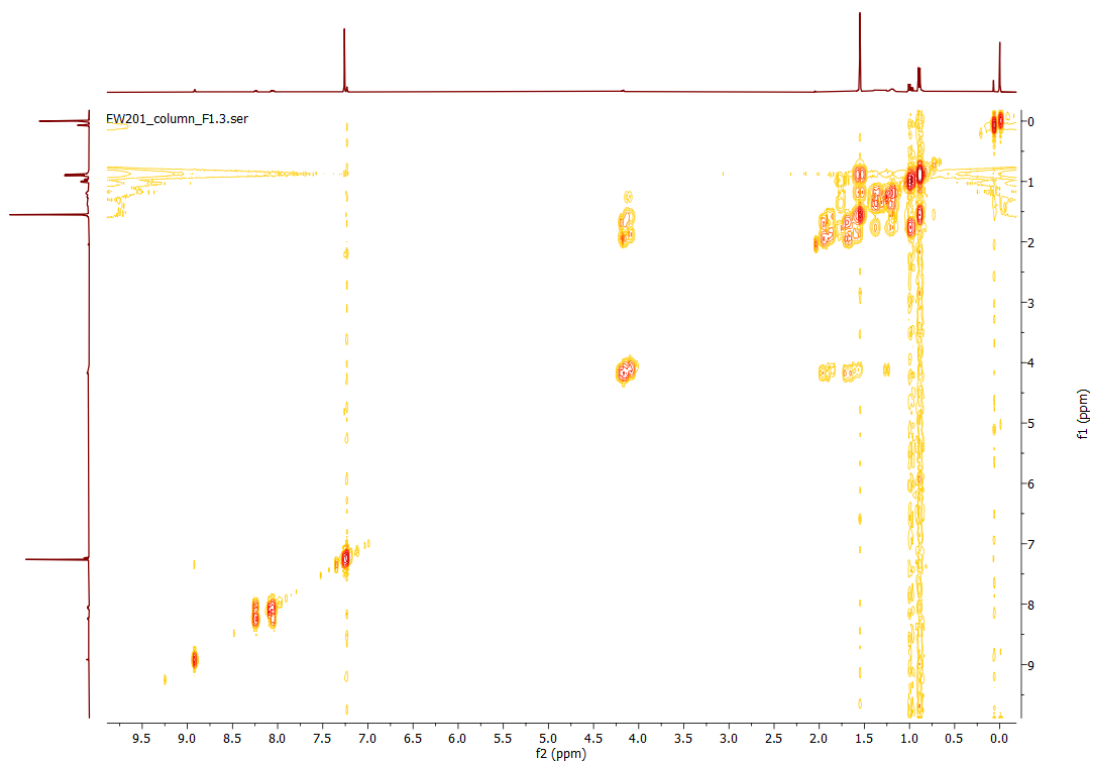

Figure S23: HSQC NMR of 2-FB in chloroform-*d*.

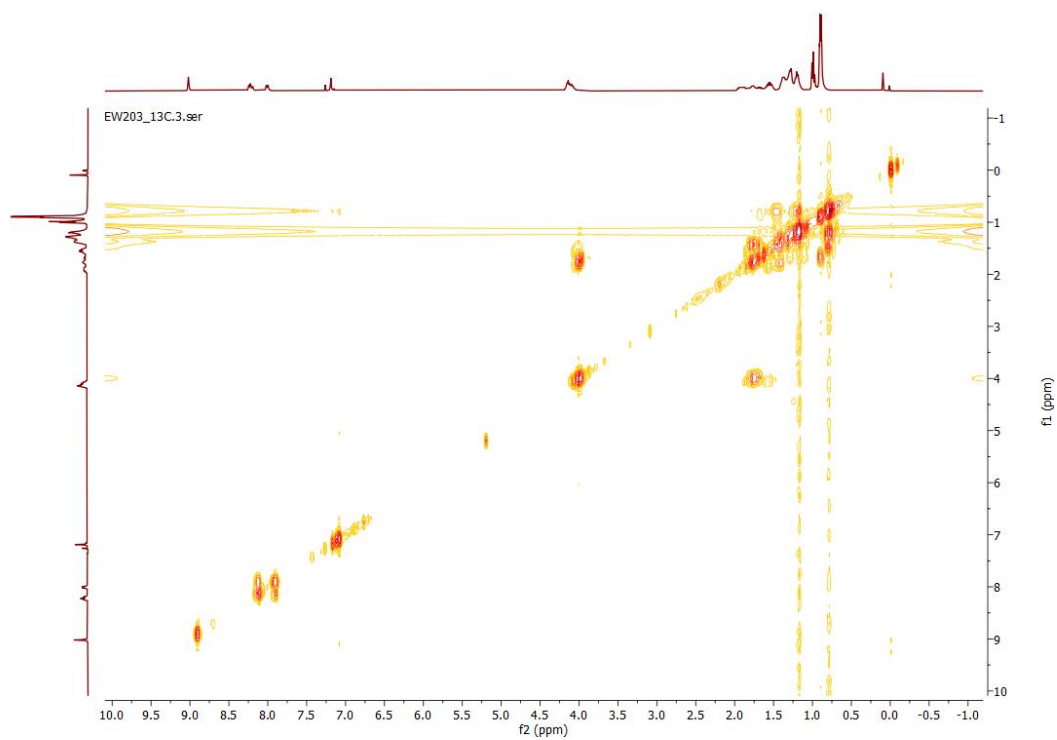

Figure S24: HSQC NMR of 2-Zn in chloroform-*d*.

### 8.3 MALDI-TOF:

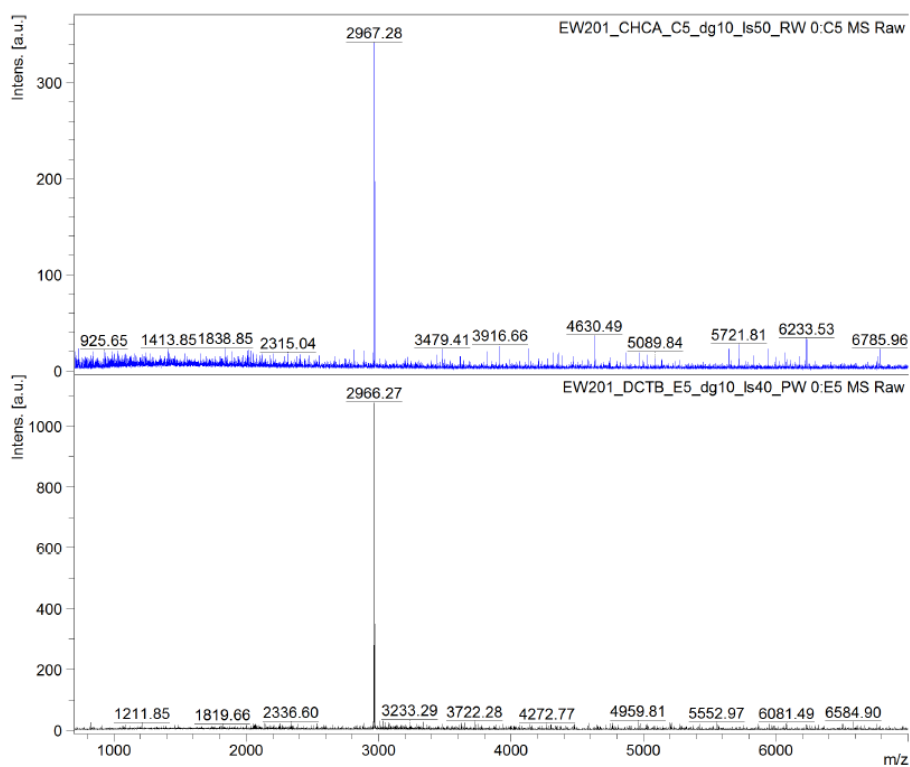

Figure S25: MALDI-TOF spectrogram of 2-FB.

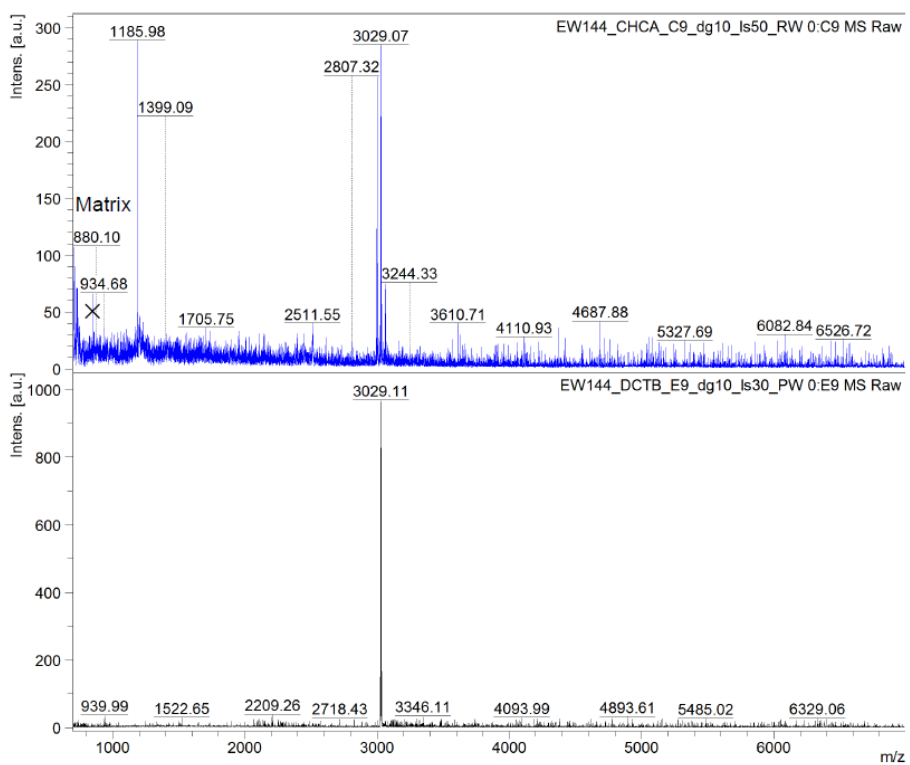

Figure S26: MALDI-TOF spectrogram of 2-Zn.

## 9. References

- (1) Helmich, F.; Lee, C. C.; Nieuwenhuizen, M. M. L.; Gielen, J. C.; Christianen, P. C. M.; Larsen, A.; Fytas, G.; Leclère, P. E. L. G.; Schenning, A. P. H. J.; Meijer, E. W. *Angew. Chemie Int. Ed.* **2010**, *49*, 3939.
- (2) Lian, W.; Sun, Y.; Wang, B.; Shan, N.; Shi, T. J. *Serbian Chem. Soc.* **2012**, *77*, 335.
- (3) Kresse, G.; Hafner, J. *Phys. Rev. B* **1993**, *47*, 558.
- (4) Kresse, G.; Hafner, J. *Phys. Rev. B* **1994**, *49*, 14251.
- (5) Kresse, G.; Furthmüller, J. *Comput. Mater. Sci.* **1996**, *6*, 15.
- (6) Kresse, G.; Furthmüller, J. *Phys. Rev. B* **1996**, *54*, 11169.
- (7) Perdew, J. P.; Chevary, J. A.; Vosko, S. H.; Jackson, K. A.; Pederson, M. R.; Singh, D. J.; Fiolhais, C. *Phys. Rev. B* **1992**, *46*, 6671.
- (8) Perdew, J. P.; Chevary, J. A.; Vosko, S. H.; Jackson, K. A.; Pederson, M. R.; Singh, D. J.; Fiolhais, C. *Phys. Rev. B* **1993**, *48*, 4978.
- (9) Blöchl, P. E. *Phys. Rev. B* **1994**, *50*, 17953.
- (10) Kresse, G.; Joubert, D. *Phys. Rev. B* **1999**, *59*, 1758.

## 10. Appendix: DFT coordinates

C-CENTERED MONOMER

```
1.0000000000000000
 35.1161850000000015   0.0000000000000000   0.0000000000000000
  0.0000000000000000  32.8993200000000030   0.0000000000000000
  0.0000000000000000   0.0000000000000000  16.8059690000000010
  C      H      N      O
  72    50     8     4
Direct
0.1880132670772022  0.7385597222002495  0.3652374573483335
0.2036911045243609  0.6880265058295854  0.4936222662191727
0.1688977844080555  0.7082034421765782  0.4894310472012576
0.6592707537388143  0.7165112611714222  0.6193802523643850
0.7141455556359159  0.7599099955319474  0.5735581510842449
0.7161934242745622  0.7862088743140000  0.6393277937017402
0.7448569989964373  0.8155830436255276  0.6421503680448980
0.7410111253955382  0.7637065533290091  0.5118838026205981
0.7694303182945816  0.7931501382361806  0.5157193826557057
0.7715568262133876  0.8193519682186854  0.5810316420769357
0.5418766603703898  0.4194045614180992  0.4875844641891928
0.4972337838326614  0.3705594270479754  0.5014369805873689
0.4238090712210153  0.4565028290181314  0.5103034759583398
0.4153100470366424  0.5236845844007636  0.4879228047325040
0.3784992281606315  0.5048433643747110  0.4906591497646944
0.3836271274418574  0.4641762402526743  0.5058956603651800
0.5860817078899290  0.4789616090433301  0.4908348505923667
0.5773085625853154  0.5459183380703836  0.5155927914994900
0.6174876493290090  0.5380883659973066  0.5152792619213381
0.6228367667809707  0.4975697412976192  0.4989006646665863
0.4596448402243894  0.5830456678138413  0.4891152338869726
0.4660610182559700  0.6267868136578170  0.4923904168626388
0.5036490497034543  0.6319232466737713  0.5092552667471992
0.4810633185693518  0.4111830475813285  0.5084593094970670
0.5349439616256487  0.3757107712841731  0.4858676484879181
0.5201600445759923  0.5912984760517931  0.5127604135291957
0.5594081684060063  0.5839033904650333  0.5237228437834782
0.4233281660691776  0.5653203436867713  0.4795339008326208
0.4416921713222526  0.4184869888520685  0.5178772072207368
0.5783249862789828  0.4372930733099031  0.4800376600642740
0.5847766639348283  0.6187641538847971  0.5452366627435330
0.6001864028806142  0.6448977182205273  0.4877313438409038
0.6245266555676163  0.6765245828699807  0.5098248116490781
0.6338089605591304  0.6829621546431219  0.5900726550877898
0.6177571492735769  0.6573526133357170  0.6477384334325911
0.5939008951331878  0.6255328050499529  0.6255477300224186
0.6116926823193387  0.4113574406331210  0.4591793993365563
0.6254560350343005  0.3805503379201396  0.5093697615831240
0.6571314213297980  0.3574097206195827  0.4877492109347342
0.6758345086164422  0.3641909106444351  0.4151168378508626
0.6617154539514424  0.3944876661211687  0.3643052807963614
0.6304787877862233  0.4178863681055238  0.3863214036587334
0.4161611195156232  0.3833577153076898  0.5368815352053333
0.4064428957739484  0.3757964422419566  0.6166073404989239
0.3825776120724168  0.3436509152831645  0.6368274350172823
0.3671035460155663  0.3184945159380631  0.5777142083120982
0.3769842472341946  0.3257209982391858  0.4980363453088239
0.4013304583096214  0.3576918083641633  0.4779093571349246
0.3903248373271397  0.5921595911408672  0.4591767867005063
0.3799616871973814  0.5970678992101902  0.3790042174756086
0.3492468935427011  0.6214782475010605  0.3577486574874660
0.3274868294333605  0.6411434765356658  0.4161755385814241
0.3379291022761880  0.6366120787945652  0.4962965435175186
0.3690685289788253  0.6125098370547420  0.5174994388750968
0.1608022862621165  0.7336692861506622  0.4250391561333302
0.7098246413314505  0.3406777823820153  0.3860391595562406
0.7644817544042052  0.2986379576295790  0.4374166826203070
0.7801217649221430  0.2827398358651215  0.5079492197135781
0.8131152026277826  0.2592987893875899  0.5057376575739041
0.8311204794043348  0.2513389604128279  0.4332046118129909
0.8155844573426121  0.2671535154333721  0.3632861509981073
0.7824986667567609  0.2906753951591676  0.3643716526427189
0.3414823030041711  0.2846285355182323  0.6050119840385301
0.2868762753804730  0.2416682025408954  0.5562502309856086
0.2603418581391064  0.2386128439158453  0.4937959280566119
0.2316315480791100  0.2094563281853700  0.4960495318565753
```



0.2842316705649242 0.2149098377352149 0.6212045170703857  
0.2552886905888060 0.1858279529745525 0.6224498264080974  
0.2289039504923512 0.1828043996980720 0.5605676770718864  
0.2947624506169045 0.6667458286112865 0.3876008730696999  
0.2310684130151331 0.6929541044061488 0.4332647666936464  
0.2230332535331334 0.7185423025324589 0.3684425641770884  
0.4445252150009478 0.6501427154032859 0.4841732121410318  
0.3771029449772459 0.6094919704320680 0.5799947015792346  
0.4815784070359574 0.3421529364178105 0.5058531098306021  
0.3517473470412604 0.5208878488695895 0.4828876397779586  
0.3617894369216587 0.4410545385868792 0.5121940936612562  
0.5189667260032108 0.6603212911471644 0.5174906080918890  
0.6392300751999133 0.5609564481482773 0.5254740921746979  
0.6497100141234969 0.4814642436024616 0.4942542146365299  
0.5929578599882679 0.6404310830175691 0.4251402232006767  
0.6352911386710723 0.6968748944477398 0.4635623330145413  
0.4704589103011493 0.4977927282069008 0.5007561417427514  
0.6244559387338037 0.6630418543308176 0.7101573751685034  
0.5819052346579137 0.6055031018448163 0.6709055726582406  
0.6113302674001923 0.3748851438603090 0.5661669424904667  
0.6663850603711152 0.3332195051657543 0.5279773456631351  
0.5307998980562640 0.5050245152047514 0.4994909951820616  
0.6758288095372519 0.3990527374461353 0.3071416036129498  
0.6199515182414945 0.4415053844383144 0.3463166126341887  
0.4179592842915294 0.3954680552062777 0.6630953605011135  
0.3754369846384567 0.3373384142337719 0.6988004097398149  
0.3414362582402648 0.6258367260057884 0.2954870105794017  
0.3667165543915754 0.3057207584532086 0.4507216599687536  
0.4090022956093953 0.3627901755538535 0.4157346783548684  
0.3964239508487832 0.5815276017472644 0.3330137960643849  
0.1335421185395536 0.7495001757478086 0.4216007583562197  
0.2064199156283564 0.1599260094659443 0.5624940691114172  
0.7226734672902216 0.3273882181934185 0.5015551471656692  
0.7661321916869713 0.2887878901334442 0.5648938312747294  
0.8247657308249671 0.2471377724708803 0.5610620228126428  
0.8569545923360159 0.2329335681272647 0.4313148132267012  
0.8293879979235486 0.2611794078255663 0.3062321106344619  
0.7704050922381085 0.3029645122326069 0.3099139320304946  
0.3140920236709835 0.2883034630689665 0.4983129215198940  
0.2622517900203442 0.2594648772235573 0.4432285524401353  
0.2112662536414655 0.2076099055206631 0.4471058256622364  
0.3045974378606109 0.2174230048561961 0.6696939607878143  
0.2534528380078158 0.1651596652224839 0.6731441710208331  
0.2679712202509858 0.6553042921069009 0.4928858884762180  
0.2440761807320890 0.7221289184586839 0.3215180944648830  
0.1820435878168343 0.7583667903311320 0.3146212864597479  
0.2097967536513548 0.6680319275679939 0.5440664894784597  
0.1479813071405846 0.7039193267708991 0.5367375732222687  
0.6876817366335185 0.7133910854745262 0.5137831133372979  
0.6955987580082003 0.7830987629458689 0.6872531603993084  
0.7462090854442291 0.8358568692530810 0.6935176353588440  
0.7395213411607723 0.7432858438716096 0.4605925749246416  
0.7900362811787850 0.7955988383906752 0.4672963027115429  
0.7938009277458649 0.8424484973386324 0.5841673152720216  
0.5560408793086544 0.3522530496577068 0.4746777203682344  
0.3226030373145354 0.6528104565923369 0.5432255006861310  
0.2656337815214184 0.6717227280859344 0.4418329039124106  
0.6861440538463482 0.7295908854506893 0.5652439547627500  
0.5086633378888025 0.4403504069338736 0.5002529249228783  
0.4416509880894430 0.4933186615266834 0.4997144827775865  
0.5596225993717135 0.5093064189935625 0.5012274613010566  
0.4929164925331769 0.5620975448192855 0.5008434906590359  
0.7311382407906127 0.3221214823463343 0.4446029275613085  
0.3151556261703128 0.2718162307112026 0.5494696319263931  
0.7177895776825580 0.3391317301460123 0.3144759676636663  
0.3439925809007342 0.2703686965953717 0.6728179757697006  
0.2943940161888502 0.6813105659491825 0.3198665532106995  
0.6561374998609892 0.7302926066937193 0.6874439278231749

C-CENTERED DIMER

```

1.0000000000000000
37.7404459999999986      0.0000000000000000      0.0000000000000000
  0.0000000000000000      35.6461979999999983      0.0000000000000000
  0.0000000000000000      0.0000000000000000      21.8059699999999985
  C      H      N      O
  144    100    16      8
Direct
0.2050685932769446  0.7150733810465413  0.2959506339868013
0.2222844688671591  0.6636896103689912  0.3872511959730806
0.1882899348660864  0.6787917201065272  0.3845049373418750
0.6483701570139953  0.7058963957883291  0.4494722246943860
0.6870289292575582  0.7560234892091841  0.4026432203205452
0.6854151559206221  0.7829971684714546  0.4494020575820920
0.7066278578197406  0.8149820547449265  0.4454490440892517
0.7098966591636964  0.7615902571181067  0.3525964511543557
0.7308924911856638  0.7936513090636528  0.3492607291979447
0.7294176059750431  0.8205503042413932  0.3958201307925807
0.5391860845822393  0.4266034400218829  0.3638806062382229
0.4977165197508563  0.3814722734926517  0.3742437351164651
0.4294636837959439  0.4614638778973831  0.3762558770701111
0.4230301639718116  0.5240520347377025  0.3629374505463548
0.3884435126451557  0.5073662736407367  0.3623694030332665
0.3923109131777160  0.4694211803805819  0.3712540147654120
0.5809910226874030  0.4813102249707538  0.3648100895946442
0.5743287806314535  0.5437207064702273  0.3804435620934128
0.6115306455813688  0.5356547149694901  0.3788398963448286
0.6155802496404343  0.4978471682240234  0.3688321654363855
0.4649143702696185  0.5785338184853203  0.3653088935047280
0.4705476939711419  0.6188046174079533  0.3709237261334614
0.5057425466856249  0.6235909820530809  0.3815878490358378
0.4822450393208969  0.4189347336735098  0.3757983024817213
0.5330403892567821  0.3862286067137344  0.3649772767785152
0.5215786225620240  0.5862500256295066  0.3798816719898540
0.5582987099114096  0.5792377003753674  0.3861749297627469
0.4309767988206576  0.5624814555022746  0.3586304083532045
0.4454480251033814  0.4258805591422268  0.3808792385682673
0.5732534468911853  0.4428024829521936  0.3589454359645629
0.5823547081077290  0.6113343152822273  0.3998698688614084
0.5866646561507139  0.6413755972438913  0.3588459349503835
0.6084228082063168  0.6716926488181921  0.3735293586061810
0.6263230304612712  0.6730129304845643  0.4299502410474909
0.6222765487054460  0.6429882167517552  0.4708748173264818
0.6009522780270351  0.6124922939062137  0.4557831662314614
0.6044202985105279  0.4178263739719255  0.3482657803098109
0.6160128861615556  0.3921160302629749  0.3926853746374027
0.6458539347648278  0.3698432321961771  0.3825235420158118
0.6646914716683091  0.3723127586101360  0.32722223232589904
0.6527538190376555  0.3974769266990559  0.2822608950247110
0.6233734251631947  0.4201427263277928  0.2928381791270062
0.4210666311416731  0.3935760999566696  0.3914279180949174
0.4020065693167861  0.3910783993113792  0.4467381848865551
0.3801260153356572  0.3605442136190009  0.4588979458111285
0.3759831298162895  0.3318082739886571  0.4155760979537137
0.3944287047457878  0.3344475628364067  0.3598017819644728
0.4167295093093014  0.3648164100351465  0.3480354286962995
0.4001663423216695  0.5880095165323608  0.3471863695321056
0.3905059484905120  0.5971539572929334  0.2868449175601434
0.3611730424742571  0.6197626652805127  0.2753191076833493
0.3403056180353353  0.6333537640652215  0.3237089038166115
0.3502658467500294  0.6249053013603371  0.3841425774833797
0.3799952167737071  0.6026525170104502  0.3955617831340444
0.1793893291113432  0.7045861283309248  0.3387326513445532
0.6959596004423777  0.3480593119384645  0.3111388815823621
0.7424738441594089  0.3075298361760223  0.3595274442371136
0.7548367514262473  0.2948179578162431  0.4167705031198653
0.7820760407510219  0.2685628570085630  0.4201310677526914
0.7974545678548425  0.2544068863792469  0.3665893208882025
0.7851485378047606  0.2669942717365567  0.3098244852120500
0.7579225976330902  0.2933975710211472  0.3055535899836178
0.3532741932666127  0.2988145799783797  0.4322058879765422
0.3149241196427943  0.2499375589587263  0.3814742636355843
0.2925085521891732  0.2455435816049191  0.3305196521885660
0.2711262752267776  0.2138631596703390  0.3251527108930991
0.3157681124324712  0.2221086012514600  0.4269627747968608
0.2941617857843102  0.1905405969167597  0.4210023277591818
0.2717507057322002  0.1861850536857746  0.3705398295239040

```

0.3085199603155868 0.6565142888612728 0.3064268751391604  
0.2480666668765385 0.6741797684211145 0.3439102123127314  
0.2392760555465086 0.7002155799206924 0.2979372381449709  
0.1898511370354233 0.6923224208039631 0.5627036105856134  
0.2083961619013949 0.6430831373493204 0.6563195177645805  
0.1765025092978509 0.6626447604934768 0.6593629128588797  
0.5176786646920094 0.7212968159287045 0.7007586292235038  
0.6628544514967810 0.7670305536410723 0.6630872368665562  
0.6604071029985246 0.7933398565166548 0.7109464975776858  
0.6849356092776264 0.8225851942362227 0.7141762059539747  
0.6899193986105282 0.7707406845333249 0.6191582807768395  
0.7141647526144972 0.8001130887244480 0.6231100666248397  
0.7119059095435418 0.8262398265327540 0.6707511597591005  
0.5502758555399774 0.4309920717410113 0.6200456957540604  
0.51669703733257538 0.3788225449479462 0.6275608938003738  
0.4361981708424953 0.4443194768862381 0.6358097752444243  
0.4175769048435239 0.5042160143199238 0.6235126315896736  
0.3868745054723424 0.4805692131356411 0.6268419083547089  
0.3981819746146854 0.4442658223296438 0.6349696602897060  
0.5816981254939192 0.4927713815432664 0.6221219396219043  
0.5631699494827478 0.5523393333952510 0.6383450218788437  
0.6011848220866500 0.5523949849423250 0.6370175690678725  
0.6124219547074912 0.5163092170332375 0.6264088342118855  
0.4489914527143034 0.5660419253179018 0.6245213278268684  
0.4487187766070205 0.6069794846551975 0.6246872950875284  
0.4827345977835747 0.6179670253040341 0.6345954973623192  
0.4955784311102389 0.4129074754574528 0.6325460968686605  
0.5506879165072962 0.3900860115366643 0.6182547794921529  
0.5037609611011946 0.5837532095092023 0.6377572326966259  
0.5409931185683987 0.5838843318795881 0.6438630817963786  
0.4182132208315565 0.5436277949900348 0.6189239649223415  
0.4583727807828425 0.4126527124515251 0.6389786673118850  
0.5809967841526704 0.4535066332850827 0.6153650100441942  
0.5594616604603655 0.6202639255031425 0.6565178491141879  
0.5676089388828096 0.6457999713703317 0.6096844800123855  
0.5866904423836201 0.6785209151222011 0.6221546425970756  
0.5974172117579342 0.6867785717058564 0.6822351893966091  
0.5882505106656685 0.6618567883573582 0.7294440651720648  
0.5699624257498770 0.6288717614950718 0.7166976746580294  
0.6155994072924845 0.4349673919645031 0.6019378482171930  
0.6323002161398026 0.4110426973880374 0.6441594292850078  
0.6644505062524247 0.3937831382597707 0.6298733976372644  
0.6805128583309501 0.3995625178743590 0.5725561226028172  
0.6637207634852144 0.4231236616257393 0.5300811156326265  
0.6320383339330639 0.4409351722258535 0.5449044779215573  
0.4398293031312611 0.3760511915815747 0.6490268067212900  
0.4281598416449117 0.3664145746178679 0.7081456332742686  
0.4094603829421795 0.3333432949659113 0.7182381957012997  
0.4010180210369147 0.3094047698416960 0.6692823398291413  
0.4130648094099352 0.3185863190399710 0.6103221747148213  
0.4325819686870562 0.3513592637312525 0.6005650094701078  
0.3835732866914333 0.5623260258246904 0.6067865851244422  
0.3657872288255485 0.5554920749610384 0.5511554445081660  
0.3343457707879374 0.5739333993798197 0.5369667579914628  
0.3191540389063097 0.5992370370804072 0.5785995457607247  
0.3362634071627061 0.6054697147126913 0.6348754098744457  
0.3680711524891934 0.5873804175745440 0.6486382685738863  
0.1669983967679622 0.6873655278178482 0.6124232050127982  
0.7145373010212137 0.3811823037026799 0.5534802927927794  
0.7736565252371537 0.3627654585181960 0.5987932034366257  
0.7907291783067419 0.3580801066568505 0.6556007132200552  
0.8252203925953590 0.3443242669649702 0.6582291216945205  
0.8431986310960534 0.3349871462964307 0.6043001818433822  
0.8262318429977075 0.3397456237507330 0.5479469044198148  
0.7916940829952830 0.3536201500837589 0.5445157828752405  
0.3798315433446471 0.2749439837848888 0.6846220964703785  
0.3345406229719561 0.2312110311120974 0.6414275889589072  
0.3080932711959652 0.2294155835031672 0.5960947856537017  
0.2832762709883719 0.2004909142246017 0.5965884955914935  
0.3358268164340391 0.2034695005393331 0.6871996666204939  
0.3107802258511612 0.1746576616754680 0.6869041628404526  
0.2844074543378338 0.1728890730828320 0.6420716896362145  
0.2862764986303514 0.6197664420557825 0.5594515364011030  
0.2313267018042080 0.6480628634810215 0.6061820207075075  
0.2219366917427924 0.6729621649183480 0.5590733359075403  
0.4501021866511926 0.6402193390112513 0.3685711258319655  
0.3876677472402954 0.5965127186044881 0.4427618302890229

0.4835326474652519 0.3551320434525883 0.3790645356544922  
0.3639457836698021 0.5228253463648659 0.3559142966699800  
0.3715106537567805 0.4484255278537054 0.3729419395276460  
0.5195802587665103 0.6498214474012396 0.3898793819689133  
0.6323403417355377 0.5564338833745607 0.3839239111585365  
0.6402559287073807 0.4824092714711142 0.3648832142855460  
0.5726013646593135 0.6409833384340345 0.3151092089846396  
0.6103081435881936 0.6950950261420477 0.3413000825749083  
0.4737853089772793 0.4981209902501907 0.3722884101964274  
0.6358019473968823 0.6441275186188280 0.5150483255490422  
0.5979033747537559 0.5893974237607744 0.4882909619011187  
0.6016589242388948 0.3898208718474574 0.4359872745255446  
0.6539608637021427 0.3501382824287788 0.4182172958079935  
0.5300895855507760 0.5073746254390349 0.3706965118692545  
0.6669910861321310 0.3986002155751399 0.2387425734507585  
0.6145564898329564 0.4397867332119547 0.2575629404346150  
0.4051037825873776 0.4131494571405108 0.4810727075469940  
0.3662094659047389 0.3583308905244683 0.5026141962043845  
0.3536137209899037 0.6271890124533682 0.2285677191470268  
0.3925470513188192 0.3120357846874214 0.3257369640120530  
0.4311896083558788 0.3662357555452780 0.3047480776170904  
0.4061462083960317 0.5861884896992463 0.2487099463032879  
0.1527026897377472 0.7163065849825264 0.3264005769397441  
0.2549610214773629 0.1613896123277646 0.3664396135822221  
0.7084946708439722 0.3441821028301212 0.4025582593875570  
0.7428321915745011 0.3058274364991768 0.4586545840073720  
0.7912302978845497 0.2590646591162080 0.4650393593806773  
0.8187522970512952 0.2337499864935329 0.3691845931340060  
0.7969145378002868 0.2561737982588847 0.2676176222010622  
0.7484226299627238 0.3032153221536967 0.2613029612763944  
0.3380501876482009 0.2966088861421724 0.3429698832731529  
0.2918367166719160 0.2671874839614572 0.2949802570853782  
0.2538465262814580 0.2108813126970906 0.2852926015307502  
0.3331818614601054 0.2252162809297112 0.4663555382712174  
0.2951220984911297 0.1690372104169219 0.4566264116589740  
0.2852493975285221 0.6419664155382209 0.3881886544934761  
0.2591168819922297 0.7081579927695184 0.2642164608180201  
0.1984981072411549 0.7352252275782436 0.2599832211898456  
0.2291775219283969 0.6435505694542824 0.4231131833284411  
0.1685900734962888 0.6701074123064070 0.4183356597870945  
0.6651057430753067 0.7096826503679807 0.3612628903210923  
0.6677185817344278 0.7789164007635390 0.4881739720486175  
0.7050802887589359 0.8358617443728897 0.4819775330993814  
0.7111828963031178 0.7405333382046901 0.3161716540110733  
0.7485222093360911 0.7975465755890973 0.3100984271416885  
0.7458502458826513 0.8456905599528527 0.3932968505893063  
0.5530679689524679 0.3645731484278026 0.3599816354718081  
0.3352662849792634 0.6357261974941552 0.4232234870448137  
0.4257224441872690 0.6248666127639821 0.6182389026734354  
0.3812717239191405 0.5929071791236733 0.6922588753891949  
0.5066433052570238 0.3502961534961246 0.6298877576252476  
0.3597114773677338 0.4904558400832028 0.6243103166870417  
0.3819079477934444 0.4193370147770153 0.6398156785612054  
0.4928792824002830 0.6464079359966052 0.6382901949490944  
0.6174838066981303 0.5771893771545659 0.6432922405438277  
0.6395490026925074 0.5064417556026845 0.6227996504829173  
0.5592055732370735 0.6398085032354844 0.5627951707833936  
0.5928362518337204 0.6976068665306714 0.5843848229113311  
0.4722197798703526 0.4904352024320290 0.6289481368423513  
0.5959649111816947 0.6689898732475137 0.7762250298784837  
0.5636036423300546 0.6093677538405667 0.7537225984433731  
0.6198693706855029 0.4059061402310749 0.6885758804712574  
0.6763638469268810 0.3747253080177108 0.6633292224441509  
0.5270817944232287 0.5064574951865750 0.6291016934996738  
0.6758368800249811 0.4271221519877662 0.4851323596655469  
0.6193244961356726 0.4593411123172583 0.5114466330653432  
0.4338709686662989 0.3852332611251758 0.7464140106006920  
0.4007385960210449 0.3254543232922178 0.7641753076461096  
0.3212782450149799 0.5692846670304434 0.4929729548208159  
0.4075564203910546 0.3002164930332298 0.5713363467770818  
0.4419295790466207 0.3581424471066917 0.5544952171490026  
0.3773918353309723 0.5359872675794183 0.5181537938088977  
0.1420056465755678 0.7026894412697483 0.6146944781911861  
0.2648744204780117 0.1503056937475636 0.6426256969971765  
0.7311569695486867 0.3877527156793118 0.6412866610162500  
0.7767399929413273 0.3651754048952757 0.6979748646975312  
0.8380565978577652 0.3408067502550177 0.7027125854615611

0.8702069402442840 0.3241341609613249 0.6063184938741735  
0.8399663215271110 0.3326447793650981 0.5054283600586557  
0.7786928126936116 0.3574454081519894 0.5004979908239487  
0.3577947975136633 0.2763625300885419 0.5983280979917819  
0.3071860742146608 0.2509669851383954 0.5605064899988104  
0.2628275716837729 0.1997119578001672 0.5611726664647547  
0.3560396071521398 0.2049661435900918 0.7226080988478414  
0.3120444639811226 0.1532425565420902 0.7226437943185371  
0.2695507187546939 0.6157196237619557 0.6476634900494023  
0.2395710002889492 0.6769746903701607 0.5202014172081090  
0.1828350535352010 0.7116493389045286 0.5258033639568979  
0.2156653466870942 0.6236394637593043 0.6930334930108318  
0.1589752775328677 0.6584319793758360 0.6985837942579793  
0.6411505607662119 0.7226779870902965 0.6155838253180586  
0.6396833223023399 0.7903988548217037 0.7452222610115865  
0.6827552340154497 0.8428174713655604 0.7515976842910246  
0.6917455966793272 0.7503368822913105 0.5819007829874551  
0.7350921852953650 0.8023871641283544 0.5887151234450104  
0.7309931189899012 0.8491601708305183 0.6739762631332302  
0.5738129753148880 0.3724610558900426 0.6112012655410142  
0.3255017191381535 0.6256409872550276 0.6677224365540899  
0.2817763268202625 0.6575664604092114 0.3494221270159447  
0.6657348451512746 0.7235180327656092 0.4020647972926479  
0.5079543219884252 0.4459082902212004 0.3700453065442839  
0.4468424647964555 0.4952240884396242 0.3711889479262329  
0.5570500376829876 0.5101238258405817 0.3718719080041916  
0.4962214657937094 0.5592936882433956 0.3706457975389570  
0.7146271439758235 0.3338478040835854 0.3601383298765641  
0.3366471488997069 0.2821238331733803 0.3831143095390718  
0.2635755626896633 0.6280879806477848 0.6069020454406788  
0.6392454613532542 0.7366296183842399 0.6563597033348223  
0.5164990695276658 0.4442393259552133 0.6281223279256963  
0.4465941603447299 0.4811191385633806 0.6291414179832414  
0.5527153886421093 0.5157406530176961 0.6295147592373442  
0.4827528911388448 0.5525666185721836 0.6317657232671104  
0.7389288658570772 0.3774342611422384 0.5998912031915602  
0.3588168704921289 0.2612221824201226 0.6380444036789088  
0.7033985351828982 0.3416858023598209 0.2568205480648212  
0.3500482018591994 0.2880196411609147 0.4860172041167088  
0.3068595437764102 0.6723170123573069 0.2559959847147032  
0.6504677414603448 0.7158050957265687 0.5039166077735376  
0.7198230383554356 0.3711174568805322 0.4997420432711137  
0.3810235234045891 0.2611065590604798 0.7366059793894498  
0.2806100572907986 0.6281286194045996 0.5050906447882956  
0.6152042418459183 0.7338318855139817 0.7535087607356207

C-CENTERED TRIMER

1.00000000000000  
 36.5045130000000029 0.000000000000000 0.000000000000000  
 0.000000000000000 34.566738000000009 0.000000000000000  
 0.000000000000000 0.000000000000000 27.989889999999999

C H N O  
 216 150 24 12  
 Direct

|                    |                    |                    |
|--------------------|--------------------|--------------------|
| 0.5295704076151166 | 0.4184554431577372 | 0.3001215843294321 |
| 0.4814468517491031 | 0.3781779768341953 | 0.3089887857302409 |
| 0.4211102692466029 | 0.4693085748733233 | 0.3066136762555501 |
| 0.4219994332818950 | 0.5340843330785863 | 0.2948587530825706 |
| 0.3844979026831306 | 0.5217001963587365 | 0.2953761325419044 |
| 0.3839445619769131 | 0.4824392412482332 | 0.3029750150346064 |
| 0.5790558172800377 | 0.4687450099368901 | 0.2993860168852696 |
| 0.5795297063405513 | 0.5337151831529945 | 0.3096807898457702 |
| 0.6167709036023242 | 0.5205655141701636 | 0.3085047654037579 |
| 0.6164946028446752 | 0.4811854016417113 | 0.3019019623293146 |
| 0.4714220210468379 | 0.5843054615503698 | 0.2968122321169506 |
| 0.4823397227740816 | 0.6247657137724932 | 0.2997570081087623 |
| 0.5189936115343524 | 0.6248215624826976 | 0.3082866245394407 |
| 0.4701335786767770 | 0.4186298665579571 | 0.3083833341076182 |
| 0.5183310620464487 | 0.3780455352168381 | 0.3024373430847936 |
| 0.5305086615650031 | 0.5844005373434504 | 0.3083102197814411 |
| 0.5673274727101454 | 0.5722578914353867 | 0.3133811768127164 |
| 0.4346757495962870 | 0.5724217537930090 | 0.2912307432396088 |
| 0.4332060328623367 | 0.4308312587017776 | 0.3113998011069307 |
| 0.5665289470947756 | 0.4302805642945284 | 0.2962651780957232 |
| 0.5958478318483117 | 0.6020534633708357 | 0.3234429804583983 |
| 0.6037266392362026 | 0.6319180186537019 | 0.2909735950979673 |
| 0.6293803318065886 | 0.6604328200554278 | 0.3020270483190238 |
| 0.6479604430514740 | 0.6600278182907112 | 0.3459859576722790 |
| 0.6404435760382939 | 0.6300530965577854 | 0.3782887505029772 |
| 0.6150858417369254 | 0.6013958895507796 | 0.3670088083905305 |
| 0.5953321320182590 | 0.4001278264335509 | 0.2893512236750766 |
| 0.6035282115117094 | 0.3728594213459581 | 0.3249268122854999 |
| 0.6306894628161600 | 0.3450159807679224 | 0.3178817496521450 |
| 0.6500619503005715 | 0.3433547901049461 | 0.2746644813866043 |
| 0.6417096221040999 | 0.3703992760900708 | 0.2388839178518247 |
| 0.6151015020056601 | 0.3985780936628178 | 0.2462632750807035 |
| 0.4044134902042026 | 0.4010376164805068 | 0.3201731245478313 |
| 0.3844485095291177 | 0.4013755435697139 | 0.3631735761995307 |
| 0.3589942497993398 | 0.3725598898498083 | 0.3734205627567631 |
| 0.3520916207271304 | 0.3428089678726734 | 0.3405689675196156 |
| 0.3712825695375934 | 0.3428434642041335 | 0.2970578576252925 |
| 0.3970859292833222 | 0.3714744875818224 | 0.2870921504381035 |
| 0.4059542277708337 | 0.6022714362483776 | 0.2814869414456724 |
| 0.3909477335681980 | 0.6053815132928949 | 0.2354130436457786 |
| 0.3633543217945821 | 0.6320133537709136 | 0.2257361332191196 |
| 0.3491508677576574 | 0.6555736554516988 | 0.2621173929864390 |
| 0.3642948741765011 | 0.6529141179214110 | 0.3080470343810026 |
| 0.3926630731517272 | 0.6268585273976104 | 0.3173841250571403 |
| 0.1960229812177170 | 0.7556928662322683 | 0.2785563009613232 |
| 0.6776656451266806 | 0.3126170533528705 | 0.2623433076793847 |
| 0.7184666484806080 | 0.2627688375314429 | 0.2994624439093282 |
| 0.7313260529902680 | 0.2491195950122422 | 0.3437709795930468 |
| 0.7545564445413794 | 0.2172203228532135 | 0.3459095529528002 |
| 0.7653905223089732 | 0.1983153312000197 | 0.3040729290983350 |
| 0.7526402114756767 | 0.2119138049780790 | 0.2601522829916572 |
| 0.7293842509110839 | 0.2438998744504102 | 0.2572584191639223 |
| 0.3260464539114637 | 0.3112385575810335 | 0.3545739969941036 |
| 0.2838072937335654 | 0.2625191427141206 | 0.3160769362524114 |
| 0.2628300140857559 | 0.2570775536058493 | 0.2744910330652012 |
| 0.2392359938393868 | 0.2255801785126958 | 0.2705972633122471 |
| 0.2808690160957351 | 0.2359351029516345 | 0.3537619354180682 |
| 0.2571059313870435 | 0.2045087033883377 | 0.3493363496530520 |
| 0.2361971139106238 | 0.1990815636582017 | 0.3081036949505022 |
| 0.3187299725070739 | 0.6826734971862950 | 0.2482529080224627 |
| 0.2622525971013176 | 0.7142635609053706 | 0.2806629243303320 |
| 0.2530597225748817 | 0.7364757994747685 | 0.2403076829063163 |
| 0.2200673514758664 | 0.7569058023886441 | 0.2397890872530335 |
| 0.2382242201460801 | 0.7132484506068885 | 0.3199533192077949 |
| 0.2054000687624896 | 0.7337459979240389 | 0.3186903519308003 |
| 0.6741650559966346 | 0.6912067874330473 | 0.3608029925239706 |
| 0.7171034533686799 | 0.7396792459786266 | 0.3229753885299355 |
| 0.7200514343087662 | 0.7662255860153656 | 0.3606931209470363 |
| 0.7440330714946821 | 0.7974832209046772 | 0.3564343293116989 |

0.7383202360915281 0.7449520985959676 0.2815616304310178  
0.7621281131682356 0.7762798878645635 0.2778399606926802  
0.7651531939318410 0.8027720646143853 0.3153582014099524  
0.5390143541704774 0.4217337726490912 0.4964789906947925  
0.4957156186445744 0.3756151200152583 0.5042798802860984  
0.4256150573534878 0.4585145359954989 0.5054736877417378  
0.4184671445267258 0.5230229192781277 0.4949824349766835  
0.3827907976106222 0.5056692577333692 0.4963937081023873  
0.3871266204656847 0.4665694602262580 0.5030853471578733  
0.5822471458002874 0.4780189072855247 0.4962865253326506  
0.5749483845037525 0.5424783036974471 0.5072143434873517  
0.6134667158317892 0.5344534739407815 0.5051889072849073  
0.6178968340848543 0.4953892794590727 0.4982556391722215  
0.4616481257172954 0.5793385235910280 0.4963394111527721  
0.4683122403793971 0.6208966184008610 0.4978925371754634  
0.5047813124280794 0.6254062715811521 0.5058438846555825  
0.4800665179141795 0.4144028598567857 0.5053395374319404  
0.5323005163390429 0.3801635824658620 0.4973666448151566  
0.5204660071474403 0.5866127017246432 0.5067318599599463  
0.5584097183391155 0.5791742260002046 0.5111689829893932  
0.4264278129670509 0.5628122864961355 0.4914548627442166  
0.4420927925911462 0.4217912666698940 0.5091268614707429  
0.5743097988595903 0.4382545565830389 0.4924762326953634  
0.5838246671271635 0.6121709842636278 0.5202207586652112  
0.5886772510281963 0.6421912863850893 0.4870196210024920  
0.6128850038432091 0.6725453733497556 0.4961464872299453  
0.6324123963234796 0.6740257528833757 0.5392725412841874  
0.6274668499252726 0.6442806852521481 0.5727299020932983  
0.6039282862413793 0.6136017712783320 0.5630873493079642  
0.6063391090094552 0.4123482098424768 0.4839837083429269  
0.6175189488595367 0.3846172313736568 0.5176268881042672  
0.6478835505202860 0.3611008405098820 0.5090830772084671  
0.6675035090058715 0.3642158619816754 0.4661601819511245  
0.6561600725155599 0.3915420471031681 0.4322121819356615  
0.6263701040636515 0.4155539785872657 0.4412325552153596  
0.4165997759973269 0.3886799670833385 0.5171072396538574  
0.3964283008243256 0.3864701032766339 0.5598433660520257  
0.3728337612893159 0.3556514278422427 0.5684817645108247  
0.3678654266668736 0.3266122896024162 0.5341160347870645  
0.3874579883955408 0.3288716748500283 0.4910888034584738  
0.4117574532611092 0.3593425094211586 0.4829779436356020  
0.3943525551453339 0.5885046634880363 0.4821650149921868  
0.3749971029858286 0.5849023107951263 0.4389043727520451  
0.3448000140379291 0.6081563087619611 0.4292177970397656  
0.3323948532093455 0.6351234058472557 0.4629544508353970  
0.3513633340903596 0.6387238097548127 0.5063133244285022  
0.3821379012324795 0.6159515855194350 0.5155367153613308  
0.1818169330210311 0.7379170719774250 0.4810115760035560  
0.6991421313316448 0.3385486877830103 0.4533273555842094  
0.7519201112069079 0.3028757040750802 0.4889504830036621  
0.7610527329457999 0.2825348748254318 0.5307315214451649  
0.7915226968758872 0.2582527118282226 0.5315474698999096  
0.8131867470669901 0.2538073571014814 0.4907515027749307  
0.8041022582821644 0.2741084425674252 0.4492593275328352  
0.7737552116061502 0.2986484967485382 0.4480026670560626  
0.3427307272830645 0.2937626745741401 0.5462662357580048  
0.2979209171895122 0.2479271411085871 0.5108242711142474  
0.2667430220745499 0.2499278988289419 0.4816137507003730  
0.2411399226786598 0.2199938266619717 0.4820376122277155  
0.3032653032333311 0.2156404286360234 0.5403657521120293  
0.2774648355944005 0.1858579561606457 0.5404346235426321  
0.2463257949774070 0.1878241384849901 0.5114920566677295  
0.3001604785171031 0.6597941541164983 0.4498374843124114  
0.2455830734661611 0.6926895520090478 0.4837637931321692  
0.2439077521949297 0.7253094734446811 0.4540293076464046  
0.2120844921568734 0.7476508248395141 0.4529037230056424  
0.2152748190116621 0.6829041934510155 0.5121324195369429  
0.1836189630429765 0.7054674229718069 0.5106844935074873  
0.6572834731533566 0.7068515381787763 0.5523980494023187  
0.7011418406978742 0.7543094534849586 0.5181406458140029  
0.6948995722802126 0.7860115696395873 0.5483405996285013  
0.7199137947916451 0.8165247822187535 0.5491635618023426  
0.7324266691475998 0.7536137458512812 0.4890257237568452  
0.7572464140397549 0.7842694278798746 0.4902004641469311  
0.7511610463613039 0.8158617249872053 0.5203218355690021  
0.5519817305817604 0.4290988704489133 0.6896303523295825  
0.5158186980048588 0.3764298382667934 0.6961236461794794

0.4342218603094109 0.4463127990227106 0.6986293850343125  
0.4166542859547778 0.5084800931007822 0.6874866748688987  
0.3842968362335238 0.4849914554050966 0.6896669971977839  
0.3949505144177531 0.4473207725394311 0.6969213528885192  
0.5860817374420619 0.4918235435313214 0.6912145967093184  
0.5683421947692009 0.5537861641652346 0.7032846623355714  
0.6076385570262135 0.5528064643761654 0.7025138242155685  
0.6184063455345074 0.5152539583444744 0.6945993438697811  
0.4508645948148964 0.5712284621486001 0.6887500749171396  
0.4517040268784490 0.6134257853581476 0.6885146188674997  
0.4869967356083494 0.6237786466421309 0.6971760342754688  
0.4948528291755151 0.4122411421633697 0.6986229873900492  
0.5513151993212140 0.3869199038791974 0.6891941818273764  
0.5077822588568923 0.5879151617797942 0.7005381378471812  
0.5461716787072672 0.5869913152345803 0.7065613338129010  
0.4184558515902780 0.5490867983846554 0.6837579126469192  
0.4563100869048141 0.4131099493431440 0.7026139169073347  
0.5843652310321986 0.4513560703748608 0.6861299296477114  
0.5661227293226163 0.6239618976968119 0.7162907672666330  
0.5730394795531829 0.6511843643020211 0.6802555804740691  
0.5937098437822231 0.6843390171258148 0.6895993402318976  
0.6071736617885944 0.6914332659536599 0.7356897632107889  
0.5991737847368809 0.6649106360697287 0.7721752211122233  
0.5794296088470926 0.6313995574770486 0.7624914039670437  
0.6196323008043124 0.4312469651757710 0.6756959990180937  
0.6361382103375368 0.4057024645213749 0.7082398154484046  
0.6687688761667641 0.3868111435478896 0.6968145166707144  
0.6855086148063024 0.3925339232472992 0.6521975446204971  
0.6690243551622139 0.4178822691995998 0.6195447888638822  
0.6368975520998357 0.4373126355467474 0.6314080080458038  
0.4363591481888245 0.3759808945609162 0.7114878268141304  
0.4232440053755128 0.3677837653415545 0.7575851261723038  
0.404070559228767 0.3338082047906586 0.7667610164119641  
0.3964200998426841 0.3075678944169617 0.7298327680689518  
0.4095473116002937 0.3155146750237682 0.6837887078796524  
0.4297082704780189 0.3491260539745480 0.6749613341139206  
0.3832934236714471 0.5696963386540915 0.6744155072344376  
0.3642505005131115 0.5635963928653209 0.6313383088060067  
0.3324808871586359 0.5841831963235968 0.6207681633257273  
0.3182088060197597 0.6110457736547231 0.6533752665536076  
0.3366102037863283 0.6166059556655740 0.6969355952025348  
0.3686483865029521 0.5962997616847245 0.7072277080908730  
0.1698863071774962 0.7160170267005138 0.6868933249842087  
0.7198086009755502 0.3720564265202347 0.6370662009657261  
0.7800482375898191 0.3500966809301215 0.6724435016229817  
0.7976925446783685 0.3454394443621637 0.7167331374430990  
0.8325897678182310 0.3293081736741871 0.7190685669371301  
0.8504056168034316 0.3175681124893913 0.6772996633272235  
0.8328576503124919 0.3222891877361010 0.6333689045330145  
0.7979008481012960 0.3384958022769249 0.6304204669923837  
0.3752019117499045 0.2719474619642396 0.7433653325903342  
0.3286565549100415 0.2253716160987589 0.7119921460995110  
0.3028994510827853 0.2208875000557417 0.6750106363445574  
0.2771154467849486 0.1912316259094579 0.6769887477805187  
0.3284108018454212 0.1994672919245549 0.7507340618526921  
0.3023769668571859 0.1698955007019943 0.7520117643456925  
0.2765977311358839 0.1655367070346743 0.7155574057456353  
0.2850122427170719 0.6339540643798228 0.6393933953468460  
0.2318584516278822 0.6684728999678060 0.6782832623001551  
0.2225712170861164 0.6939688108740242 0.6412077536225544  
0.1916885969815706 0.7174652322155172 0.6459422417349205  
0.2099630420046423 0.6669919572233218 0.7195626780548757  
0.1792402770873166 0.6906203995834032 0.7237865647551285  
0.6292025009142642 0.7263816592297558 0.7496996953444857  
0.6754842694499785 0.7732346440845139 0.7183818768414975  
0.6760540364573596 0.7987593545352926 0.7575039960185074  
0.7020923131909143 0.8283160469298154 0.7588800779150543  
0.7009689951180393 0.7780770881989256 0.6811582904633726  
0.7267880016039778 0.8076970600034170 0.6832291738497195  
0.7275972274326684 0.8330133174550184 0.7221613140649772  
0.5362674358298667 0.3530711189873664 0.2998898119178968  
0.3543506312525768 0.6712573714581351 0.3370928105360313  
0.4642245349686979 0.6495685177768687 0.2965767720613385  
0.4043022739133087 0.6251939497818201 0.3532478282770800  
0.4636703454499128 0.3532448897404705 0.3134086005486583  
0.3611734931735983 0.5407983555181697 0.2906735527307181  
0.3600495954217627 0.4638420190884905 0.3052073458933648



0.5364886962189025 0.6498259523777110 0.3138222455447257  
0.6405707227104483 0.5391907933293586 0.3117214685085770  
0.6399783338692576 0.4620601660462494 0.2992400706214047  
0.5892625794843992 0.6329190647043949 0.2568621486075786  
0.6337484168343397 0.6839352669069790 0.2765234973325901  
0.4709936367103901 0.5009016464677963 0.3024618200213409  
0.6544535012671641 0.6298844197869038 0.4127159854715993  
0.6092947151214111 0.5784628971381225 0.3927659100480778  
0.5885486692961853 0.3736220912198134 0.3586642035139268  
0.6361306229824474 0.3242405314214925 0.3464108556023940  
0.5298416995573944 0.5019783877955524 0.3033788829054609  
0.6562995286303955 0.3683353112963184 0.2049521628771699  
0.6089348304355262 0.4194311768449471 0.2180715759712267  
0.3897779260356469 0.4241424039835118 0.3893269492017354  
0.3444926981383516 0.3724039887270185 0.4074993567425449  
0.3520322920151724 0.6350204658299901 0.1898482144079021  
0.3673233506030779 0.3195377671267668 0.2711722584959549  
0.4121613378669135 0.3707369158535018 0.2534262381468206  
0.4012335009381899 0.5866566043714952 0.2069901531846535  
0.1702329268794490 0.7716574529245152 0.2775538334571460  
0.2177265373760462 0.1743803847989828 0.3051154756321127  
0.6905685963154741 0.3065695019836060 0.3334792509201933  
0.7230314973098504 0.2639519639861146 0.3764909638075634  
0.7642189744106562 0.2071581471036314 0.3806765856602272  
0.7835720655154743 0.1732781429453887 0.3057439287205516  
0.7608860362255363 0.1974775365178784 0.2271466437765682  
0.7195895469898699 0.2545098344400744 0.2230194969938959  
0.3109345470197346 0.3081059211918239 0.2849491312921065  
0.2650555795415225 0.2777921411494455 0.2450862355297257  
0.2231406212260025 0.2217889474341544 0.2380643626453038  
0.2969412632006189 0.2400099239357023 0.3860565947805607  
0.2550902171992123 0.1840091222864011 0.3788951376886314  
0.2986382688788228 0.6795002836414805 0.3167221436509541  
0.2715776221920146 0.7371677735075657 0.2099151185207924  
0.2131772277620329 0.7740466078966360 0.2082621685055353  
0.2455698669366830 0.6962662849859057 0.3514921534336775  
0.1870241802589212 0.7323855672870606 0.3494269061736262  
0.6897318957087146 0.6945214787942862 0.2914169657764569  
0.7037407447771378 0.7623132106397905 0.3928190993363063  
0.7460106141830670 0.8179899434161070 0.3859905340125757  
0.7360772741887526 0.7242539070360910 0.2521433193375380  
0.7783896973393064 0.7799576104277963 0.2454321295879220  
0.7837696614679647 0.8273582396442301 0.3125079170579873  
0.5527750604836460 0.3575725558770818 0.4936813596544121  
0.3423787110934513 0.6596509084466858 0.5330938308552486  
0.4478501640074790 0.6434795492263000 0.4939835718396167  
0.3966445292853242 0.6190958142432443 0.5494152820878839  
0.4807427134405998 0.3486236535183658 0.5078095771770684  
0.3572170358963063 0.5214213478243070 0.4929440688844849  
0.3657094695181350 0.4449136238915237 0.5058209143177199  
0.5196400227279199 0.6523887325488531 0.5102112119079683  
0.6348555196810651 0.5561042158423187 0.5083120698224000  
0.6435174961059120 0.4796910381119152 0.4950090687504311  
0.5735232922168099 0.6415161632516583 0.4534149896030019  
0.6161620132904252 0.6953788655101329 0.4695188404761200  
0.4711392501233650 0.4969242290052265 0.5008730565898404  
0.6422225675529512 0.6457620790859071 0.6065807941237875  
0.6004663848109799 0.5905409857364409 0.5893813152411169  
0.6024337567844317 0.3817614310417022 0.5511049142107921  
0.6558616417241856 0.3398852167661309 0.5360519581700176  
0.5295110280446549 0.5040073230588648 0.5016925339405506  
0.6709779804553265 0.3934363873606906 0.39844672133312511  
0.6179580697205580 0.4368226898645398 0.4145429441540148  
0.3998864520968716 0.4090087334452929 0.5868183410642617  
0.3580057329547128 0.3535098920919540 0.6022280895817046  
0.3303969846232003 0.6058170459415010 0.3951890546139711  
0.3841793388611104 0.3065636619293398 0.4637881887691023  
0.4270086663232764 0.3606374652048849 0.4494708464789915  
0.3841802436403610 0.5637866656593319 0.4124547385874085  
0.1569962938504030 0.7554988361308141 0.4797948945888427  
0.2262513778529120 0.1644184301413670 0.5118714734265154  
0.7151909597214340 0.3387898317314035 0.5237240073324859  
0.7441185160670685 0.2860224674718881 0.5625928699484746  
0.7982314998120146 0.2426546764736290 0.5643136079288580  
0.8369629930618018 0.2346594564652697 0.4913035917063723  
0.8208313361803004 0.2709807662537934 0.4171495609900528  
0.7668451544282349 0.3143862899402295 0.4156007460123394

0.3249267498649468 0.2927689663689949 0.4764351669665691  
0.2628224041129889 0.2750444360332752 0.4585134746606491  
0.2169534081051447 0.2219893948835157 0.4592206205286997  
0.3274602782353261 0.2139271924988048 0.5629895946015324  
0.2819592966681506 0.1607789494649832 0.5634096794681105  
0.2814368368521584 0.6559015489423473 0.5191266528507446  
0.2673853705358309 0.7330437444331539 0.43204191712123838  
0.2111017397625872 0.7730285319511102 0.4297142661929237  
0.2167609345376189 0.6575525171198106 0.5353253278209532  
0.1601785444715005 0.6974026367094539 0.5327782226361115  
0.6752525852145570 0.7092476699454886 0.4826849855418049  
0.6706294883046624 0.7866923913332103 0.5709099495270965  
0.7147384399956990 0.8411177773595249 0.5726874734283832  
0.7370794118168111 0.7289168397848939 0.4654697923647854  
0.7815501847052699 0.7832760745005587 0.4674953624396865  
0.7706204624108735 0.8398237204576218 0.5213031983167965  
0.5747807555406885 0.3679537140656502 0.6846410915908625  
0.3268093138990698 0.6380373690153742 0.7226517625137058  
0.4285341772339955 0.6325460789547034 0.482666854788191  
0.3828141558945458 0.6013423806723042 0.7410001030246901  
0.5046716362776842 0.3473558200668078 0.6985732136534685  
0.3565107880393100 0.4959231083827467 0.6868124493669544  
0.3774411682443027 0.4221279340979578 0.7007143558642498  
0.4981481349448282 0.6528097167933422 0.7002226320121313  
0.6250829464039942 0.5779575038525612 0.7071530562628301  
0.6462222541325071 0.5043586781328129 0.6919659677006170  
0.5625908362935853 0.6460667356428293 0.6442666207135892  
0.5990005003916307 0.7046501929433310 0.6604867502044180  
0.4726939608857396 0.4927773121026276 0.6933804831971588  
0.6089887359212823 0.6712306068377067 0.8081577018277121  
0.5740448830555436 0.6105810163036817 0.7909918064975396  
0.6231482612572319 0.4005454896892750 0.7427871491980500  
0.6804226246776877 0.3664446256928193 0.7225518241072691  
0.5299539510618456 0.5074395821921555 0.6959402149690090  
0.6816865763894587 0.4219667442656473 0.5846047052913387  
0.6243838918954719 0.4570445049901886 0.6056659884412250  
0.4284118262334489 0.3883383319296961 0.7864437260313331  
0.3945012424420618 0.3268934811899580 0.8026960304910518  
0.3185512922351799 0.5800984283467454 0.5866455896943260  
0.4045420274960285 0.2954145822939944 0.6543590622499471  
0.4400720978997844 0.3548147045774082 0.6390654098842801  
0.3751927790562201 0.5430598316627346 0.6053393213161666  
0.1458201291116044 0.7345486081018177 0.6901190909462428  
0.2562970387102601 0.1423815084124701 0.7171486977244661  
0.7374785962048057 0.3785116295388334 0.7051628355355450  
0.7838203809482951 0.3544838554466853 0.7495323379184886  
0.8458667089931047 0.3258517031579765 0.7537440536398246  
0.8777411982310196 0.3048757284238679 0.6790553494072809  
0.8464506922969769 0.3133137870141961 0.6004338922175511  
0.7844582294596875 0.3421940947850511 0.5960993032190963  
0.3523611078736679 0.2709690129028198 0.6762269428947940  
0.3032981626479095 0.2408817907251879 0.6447585696018961  
0.2571845072333947 0.1884032030208510 0.6481082891956207  
0.3481883007254039 0.2030344548912102 0.7794170143477501  
0.3023872107696468 0.1499690126031635 0.7822931310845892  
0.2696524028688614 0.6320976422831838 0.7089898128485973  
0.2393654575351697 0.6952550168881461 0.6091799615162015  
0.1847960867298318 0.7372332668654654 0.6168756719467087  
0.2171596234392465 0.6471224173123906 0.7484914442822020  
0.1625376961461839 0.6891181082439697 0.7560811170931925  
0.6509327987722671 0.7284653358787763 0.6819315662368609  
0.6565001478620600 0.7949322838343335 0.7863961400890310  
0.7023237918044046 0.8479530236075210 0.7894512545440796  
0.7002619097474505 0.7584391039478704 0.6505612778418448  
0.7464484478241242 0.8108448529640084 0.6540845590735931  
0.7479173387549367 0.8561383727864516 0.7238295317265736  
0.4998351516881601 0.4425767917762679 0.3034291680979284  
0.4429993171724064 0.5014481129607172 0.3015796263318686  
0.5578444548212672 0.5014832320012086 0.3039162203302143  
0.5010964684766526 0.5603045717231857 0.3018546775400451  
0.6945797061522953 0.2948089952768666 0.3003627984036228  
0.3078869076049695 0.2944176421469415 0.3168919910229098  
0.2947153888803704 0.6923474382771059 0.2842672160087586  
0.6927456662051742 0.7080321993487829 0.3234713273892919  
0.5068865418634253 0.4419504621859980 0.5009993418417221  
0.4433279404676123 0.4934361307996131 0.5005563330557473  
0.5573147331047396 0.5075674228438133 0.5017278097611719

|                    |                    |                    |
|--------------------|--------------------|--------------------|
| 0.4937235014747487 | 0.5590952832920626 | 0.5013926500782060 |
| 0.7211577390181462 | 0.3277513072179506 | 0.4906515847652442 |
| 0.3236284351829408 | 0.2785157756730672 | 0.5084496990278256 |
| 0.2775221283403176 | 0.6696341754218852 | 0.4871112218028437 |
| 0.6762039167488874 | 0.7230561722821346 | 0.5150177712072456 |
| 0.5173677301093443 | 0.4438527462854047 | 0.6949299517518150 |
| 0.4459809908651468 | 0.4838792066549238 | 0.6929209233729049 |
| 0.5566744444257899 | 0.5163022933974891 | 0.6967048856179000 |
| 0.4852997551725678 | 0.5563688495373669 | 0.6954927619759986 |
| 0.7449410734414994 | 0.3671477045185650 | 0.6730565862369706 |
| 0.3536381391675396 | 0.2563357639260431 | 0.7078989105971603 |
| 0.2632131963026781 | 0.6446740357227891 | 0.6772080139525438 |
| 0.6503521113264716 | 0.7424276360894253 | 0.7140971207220157 |
| 0.6836569846696210 | 0.3043565807151871 | 0.2199881595232139 |
| 0.3217159901935590 | 0.3014473398210614 | 0.3969186802875276 |
| 0.3157693458144659 | 0.6940978970145041 | 0.2065197037979074 |
| 0.6783201284983769 | 0.7006152440801916 | 0.4033129314907218 |
| 0.7042606180974413 | 0.3283653304837685 | 0.4111941449714187 |
| 0.3395921505648887 | 0.2821187270540749 | 0.5880889921486619 |
| 0.2947480583007073 | 0.6698690064381192 | 0.4077922889938866 |
| 0.6602831484626522 | 0.7177905646901597 | 0.5945346201709464 |
| 0.7246815325313661 | 0.3612906073539404 | 0.5951805378266146 |
| 0.3770019167850593 | 0.2589122012013607 | 0.7844884061581714 |
| 0.2782408554477163 | 0.6423175593184923 | 0.5971171516882777 |
| 0.6283504885971420 | 0.7385650941356832 | 0.7912666741140510 |

C-CENTERED TETRAMER

|                    |                     |                    |    |
|--------------------|---------------------|--------------------|----|
| 1.0000000000000000 |                     |                    |    |
| 40.406205999999974 | 0.0000000000000000  | 0.0000000000000000 |    |
| 0.0000000000000000 | 39.707859999999966  | 0.0000000000000000 |    |
| 0.0000000000000000 | 0.0000000000000000  | 31.805969999999985 |    |
| C                  | H                   | N                  | O  |
| 288                | 200                 | 32                 | 16 |
| Direct             |                     |                    |    |
| 0.2253033050715281 | 0.6942685028914768  | 0.1959677967529256 |    |
| 0.2424668301515440 | 0.6542205856293088  | 0.2644414680516443 |    |
| 0.2112290801923776 | 0.6689650105901253  | 0.2624329623053278 |    |
| 0.6403269964295215 | 0.6839350698658737  | 0.3037736298550020 |    |
| 0.6800600592507866 | 0.7252085963230490  | 0.2705666554519807 |    |
| 0.6795047273183866 | 0.7506061425574483  | 0.3012074177970707 |    |
| 0.7009731020727740 | 0.7779732409529202  | 0.2974031759507498 |    |
| 0.7021480987312434 | 0.7276989552864400  | 0.2365573557915985 |    |
| 0.7234122334279901 | 0.7551700501946322  | 0.2331928825705233 |    |
| 0.7229727727587346 | 0.7805001080258841  | 0.2636976636193359 |    |
| 0.5371343038282158 | 0.4343917172385700  | 0.2470052600723598 |    |
| 0.4982537088855230 | 0.3941121861254260  | 0.2547008345546636 |    |
| 0.4346847705443838 | 0.4661592720542955  | 0.2560981447172128 |    |
| 0.4283265524033107 | 0.5222194988704530  | 0.2460351029119310 |    |
| 0.3960809035564318 | 0.5071309046146166  | 0.2467190338094585 |    |
| 0.3999221997710849 | 0.4731628552395759  | 0.2533295138987200 |    |
| 0.5760928212979438 | 0.4834233192125246  | 0.2472026957557954 |    |
| 0.5694596626247157 | 0.5393445358246388  | 0.2582131197963409 |    |
| 0.6042651346072586 | 0.5324181030862589  | 0.2564317495453592 |    |
| 0.6082946702076202 | 0.4985328866598114  | 0.2493834969579860 |    |
| 0.4672184103402099 | 0.5712124215285166  | 0.2480606499032176 |    |
| 0.4729139689689953 | 0.6073675135223735  | 0.2507636830958098 |    |
| 0.5058046130314490 | 0.6113902770755042  | 0.2582439554583726 |    |
| 0.4839652938460103 | 0.4278226157888296  | 0.2558194626385106 |    |
| 0.5312336629774658 | 0.3981959092151202  | 0.2479631235261272 |    |
| 0.5202008372394024 | 0.5776888759498534  | 0.2581651415824506 |    |
| 0.5544462092421570 | 0.5711666839394247  | 0.2623348386400068 |    |
| 0.4355292427183495 | 0.5568134826782097  | 0.2430154283633588 |    |
| 0.4496641481349089 | 0.4342648627303809  | 0.2596527486403866 |    |
| 0.5689762265884692 | 0.4488413837989268  | 0.2432777287831298 |    |
| 0.5771283949937694 | 0.5998986571576402  | 0.2714715520421484 |    |
| 0.5823243478605248 | 0.6259999106196121  | 0.2424191255762648 |    |
| 0.6031309091580959 | 0.6529414195473472  | 0.2520410859293502 |    |
| 0.6190601928530612 | 0.6547037832250282  | 0.2912327167671874 |    |
| 0.6139258913892569 | 0.6287119331815153  | 0.3203345141873225 |    |
| 0.5936232355546872 | 0.6015390747880012  | 0.3103675586944773 |    |
| 0.5980701111033383 | 0.4264363040587365  | 0.2358050173752663 |    |
| 0.6092592442575145 | 0.4037475307584370  | 0.2664970133292195 |    |
| 0.6372009644743971 | 0.3838426669711964  | 0.2595239162538366 |    |
| 0.6543973929130660 | 0.3856879249648934  | 0.2212940100212549 |    |
| 0.6428797846814746 | 0.4078790223258177  | 0.1902290818703560 |    |
| 0.6154362994143602 | 0.4282212104444509  | 0.1975322990980188 |    |
| 0.4268722629634299 | 0.4054189606911210  | 0.2678047081829517 |    |
| 0.4098964673742976 | 0.4034330929917469  | 0.3063405456248786 |    |
| 0.3892739761357247 | 0.3763095752801751  | 0.3154416879680323 |    |
| 0.3842764698956230 | 0.3506853924376390  | 0.2858037545702422 |    |
| 0.4007897473034742 | 0.3527441574822406  | 0.2470098991029789 |    |
| 0.4218902322793464 | 0.3796368136089011  | 0.2382435934813051 |    |
| 0.4065626009977277 | 0.5792041901605265  | 0.2343179282562224 |    |
| 0.3926602998277610 | 0.5796663017322669  | 0.1938070946276347 |    |
| 0.3649064275071037 | 0.5991811318725566  | 0.1851128379402717 |    |
| 0.3495545944375124 | 0.6180462115608066  | 0.2169168967799420 |    |
| 0.3635072558204051 | 0.6179763699133578  | 0.2572858227157721 |    |
| 0.3919475524857881 | 0.5991053534501803  | 0.2656685607493537 |    |
| 0.2023619267190133 | 0.6890574424731872  | 0.2281434995881673 |    |
| 0.6834686190274225 | 0.3637753221848972  | 0.2101088782062135 |    |
| 0.7282284143048514 | 0.3288519799085945  | 0.2427101902985676 |    |
| 0.7421251713839491 | 0.3198046848711720  | 0.2816740345592053 |    |
| 0.7681892213442642 | 0.2969082228461290  | 0.2835730510715689 |    |
| 0.7808713503297827 | 0.2825783538845925  | 0.2467916014270952 |    |
| 0.7670411003863320 | 0.2915656106254558  | 0.2081630917034141 |    |
| 0.7409360153285264 | 0.3145227168577175  | 0.2056126909834239 |    |
| 0.3622564619071150 | 0.3217128146596305  | 0.2972194304250468 |    |
| 0.3228900155662956 | 0.28124711104485712 | 0.2617765645987234 |    |
| 0.3015150372060970 | 0.2795901091148224  | 0.2269705722742732 |    |
| 0.2798963137698051 | 0.2525414540700092  | 0.2222715712863178 |    |
| 0.3224366450121451 | 0.2553788195438912  | 0.2917996158799739 |    |
| 0.3006608125294505 | 0.2284077923088280  | 0.2866330344068422 |    |
| 0.2793144185823302 | 0.2267598223377472  | 0.2521674654067197 |    |

0.3194051064038675 0.6378834246484189 0.2044222381865235  
0.2654210279589188 0.6592904804682242 0.2317992601970228  
0.2567032575190809 0.6796377518508949 0.1973378583665720  
0.2086025300790224 0.6696458563865471 0.3819533103544220  
0.2188519761938920 0.6111092292482637 0.4286544194549974  
0.1875746744906463 0.6259158047960415 0.4273442682111157  
0.6077378148447362 0.7036042007217493 0.4661897252225704  
0.6444711457931497 0.7479601340722694 0.4369027624314704  
0.6331950814646472 0.7763719144201137 0.4587781191197788  
0.6525029317575597 0.8054967596714685 0.4595306916256613  
0.6750629093898213 0.7490250034571477 0.4160832797008016  
0.6941914329744339 0.7782501598253114 0.4171859787723743  
0.6830274444654301 0.8066352745697133 0.4389292985916372  
0.5465644831443248 0.4402326331060284 0.4148598776443667  
0.5154600452630804 0.3933820249722660 0.4217537979269388  
0.4402115112153300 0.4524832820308376 0.4235474961186496  
0.4239601127980835 0.5065618320861098 0.4142491090124201  
0.3949154825858804 0.4858083815233750 0.4154238482574102  
0.4047657953015337 0.4530381948549349 0.4214210321716006  
0.5762474919564281 0.4956413772195565 0.4151764244741653  
0.5598600181700066 0.5495243324451654 0.4256589019490694  
0.5953287271469152 0.5490417709379699 0.4239731738472205  
0.6052689599281631 0.5163904382042364 0.4172392698366847  
0.4535837653500235 0.5620097202701159 0.4156285939343669  
0.4530015912661102 0.5987089330083010 0.4167634357498584  
0.4846740870393443 0.6087295658030366 0.4238079452491607  
0.4954450627287921 0.4239094002041141 0.4231032594996346  
0.5471816205631409 0.4035175106820261 0.4153647761845420  
0.5046351846869540 0.5781481490729714 0.4249650743998870  
0.5394590087412258 0.5781528690764592 0.4291939117824119  
0.4248843003289618 0.5419560306943164 0.4112874944334548  
0.4605783099492864 0.4237921295436209 0.4267310273712490  
0.5753181853708903 0.4603125512873175 0.4113476536531633  
0.5568455456229743 0.6106370479921245 0.4375094258083707  
0.557480968289324 0.6368543941017065 0.4079026034953213  
0.5743956549571776 0.6667644401351851 0.4162005218606620  
0.5904354492992462 0.6714937631561478 0.4548610117993656  
0.5894768934977177 0.6455902837829911 0.4847935602551007  
0.5733739550177758 0.6154291752935812 0.4759691057217361  
0.6077513623559679 0.4434936258848509 0.4035520028893912  
0.6222806559024809 0.4218356344015338 0.4331615019443655  
0.6528931980714743 0.4068171185937494 0.4253701190921395  
0.6693842135598391 0.4124757054825450 0.3872270873654234  
0.6547297257795527 0.4336908107291249 0.3573009098716963  
0.6246476768832911 0.4493831542792086 0.3655971846493635  
0.4430857481170461 0.3911985875310783 0.4339632588047574  
0.4256067571981590 0.3861215340060681 0.4716965605716089  
0.4091298319039974 0.3559886672316838 0.4794347164928989  
0.4087201632263288 0.3303746719262356 0.4491126224311736  
0.4257885720059089 0.3353286032808650 0.4112138004300954  
0.4430767577513815 0.3652058170269344 0.4040121791748146  
0.3924521398103601 0.5588268672855415 0.4035600910814681  
0.3756959670196204 0.5534164747054008 0.3653738050210086  
0.3455952574342240 0.5691231695285637 0.3572390881670149  
0.3308194153040688 0.5898635516546746 0.3875800213845214  
0.3471064651871396 0.5949969967097665 0.4259610002900536  
0.3777470816779750 0.5799899116609014 0.4335806337421641  
0.1822509274441148 0.6552094979168902 0.4039656223226256  
0.7013053331650927 0.3955937197397940 0.3756364020624453  
0.7547329083336176 0.3757916285944873 0.406557705641918  
0.7679857455584450 0.3644606589895639 0.4448685810654419  
0.7987897515912451 0.3487294856711607 0.4458799291881756  
0.8167947576042820 0.3440123206719310 0.4088167325227412  
0.8036944673359609 0.3555251549642406 0.3708190184282114  
0.7729134975156461 0.3714573584363916 0.3693211440490263  
0.3907727775424754 0.2983949589826417 0.4592962101018320  
0.3543129740422865 0.2546904116332870 0.4282679214844404  
0.3239893634591586 0.2540670723762022 0.4067992280627544  
0.3046022594980413 0.2250039898324412 0.4071588947800397  
0.3650858066350722 0.2259864532933486 0.4499793472202953  
0.3455265059778922 0.1970256463660831 0.4499842475585280  
0.3152578271449214 0.1963430822361533 0.4287496754504033  
0.2990069862809026 0.6070973223149896 0.3765310737569076  
0.2451842669139525 0.6255346774149776 0.4062364066566169  
0.2399846577751230 0.6550071108679516 0.3828368631135194  
0.1798860986095084 0.6037251531213604 0.5427677178559853  
0.2042370759139056 0.5482587946395224 0.5866805828961352

0.1702665346253304 0.5543904396790836 0.5853366100057399  
0.5717545213539762 0.7195495133939728 0.6261318265007293  
0.5964313384178010 0.7715407519365843 0.5964037041353265  
0.5802666063819900 0.7959062324386784 0.6208512440632012  
0.5924445378243782 0.8287737817216198 0.6219535535217720  
0.6245868048401748 0.7804571990245046 0.5731139325523994  
0.6365941554203857 0.8133620546473358 0.5746546061682541  
0.6206538638168101 0.8376850258134907 0.5991013990435543  
0.5559274888773954 0.4485740989038651 0.5781906367348373  
0.5329468016764991 0.3970483776288456 0.5846037964357029  
0.4489500648497462 0.4424367707244055 0.5856181556275964  
0.4239029111126996 0.4929700759747639 0.5766927536594362  
0.3987715993492537 0.4674506727622647 0.5772611782724992  
0.4139489790510425 0.4368314654833310 0.5830094070610369  
0.5758666535724489 0.5083577506721746 0.5784462986853496  
0.5507382520186545 0.5587506282122643 0.5883099141210502  
0.5857711529880143 0.5643677613357173 0.5863976222192669  
0.6009960262063837 0.5338345344344485 0.5801334613140557  
0.4438112469376934 0.5527356505209718 0.5789039769806851  
0.4370812635967777 0.5887620075063732 0.5809075136817787  
0.4666587253626395 0.6040707106519249 0.5878815068059627  
0.5081577359662901 0.4237110380140472 0.5856841323081886  
0.5625969244208531 0.4124881008383558 0.5786995231104107  
0.4914997798835832 0.5774310652288460 0.5881049926279973  
0.5258719249626822 0.5835114183462935 0.5917670124279272  
0.4188941048601862 0.5280345119989677 0.5740795040746508  
0.4737648736732367 0.4176177820389790 0.5887429418227872  
0.5809097306544926 0.4733649503160830 0.5747806023796813  
0.5376637053316310 0.6186096774782293 0.5992525011818420  
0.5324980913828170 0.6445093679450882 0.5699052123094442  
0.5442190699780345 0.6770196642658307 0.5773861985274568  
0.5606909328548927 0.6846522546390528 0.6150017074845469  
0.5655834408452041 0.6589995695461636 0.6446443728762628  
0.5547196196410848 0.6263854814083213 0.6365941871641163  
0.6156884488545591 0.4624852829818932 0.5666346369825966  
0.6338736068087772 0.4434205513274629 0.5957773540705789  
0.6664590254492198 0.4338997634713908 0.5873999542091507  
0.6815113146539906 0.4426345563645961 0.5491856278421651  
0.6633281340627186 0.4613300330394178 0.5197728920379102  
0.6311285541961018 0.4715067470072565 0.5286165953879169  
0.4618772496505460 0.3824179282148860 0.5951180994173273  
0.4448174124128729 0.3739812053578667 0.6322256041910600  
0.4339112439960842 0.3412369792789626 0.6393119559462606  
0.4387423197776106 0.3161402166977693 0.6089161080682418  
0.4551486328573967 0.3244721281345380 0.5714880015876114  
0.4669238203030945 0.3570982733321365 0.5649708765028506  
0.3841280319109678 0.5388491798251991 0.5656326355983178  
0.3693134790675854 0.5304793808424668 0.5269835421631752  
0.3368959738251425 0.5398647683631901 0.5180571291597688  
0.3178947176484569 0.5570322018397179 0.5480534816796545  
0.3323587160296946 0.5652804535132474 0.5868045041823730  
0.3651924171305756 0.5566635724248393 0.5952268224724900  
0.1578987903183657 0.5821170477675888 0.5633195862937977  
0.7156970100177531 0.4315577749396919 0.5371727707128210  
0.7718732881691933 0.4213589275202503 0.5676597871834363  
0.7868118034405438 0.4116548982497187 0.6056752884571712  
0.8199469672616970 0.4019676283125531 0.6065239598186349  
0.8386282772862728 0.4017301278725488 0.5695357499584616  
0.8237419380112422 0.4113940068176451 0.5317940502139330  
0.7906009185285580 0.4212706701431427 0.5304763758684738  
0.4276247943905928 0.2810569075054802 0.6190812777314240  
0.4019821781564573 0.2299923491514426 0.5881278090696684  
0.3736158287340710 0.2220140717896749 0.5647125086049367  
0.3609811433758529 0.1893370601663763 0.5654299468616834  
0.4177437479193109 0.2049040309823663 0.6118546068699422  
0.4049513092761245 0.1722592122832366 0.6121063115890063  
0.3765093475265720 0.1643021841324932 0.5891764318369194  
0.2831351819079559 0.5665517309917961 0.5366989464968650  
0.2262196641371814 0.5699210977297688 0.5658331601846169  
0.2139143863623497 0.5978141557903451 0.5437776921455115  
0.1679717946522459 0.5502283702482003 0.7065827603066209  
0.2027347639409653 0.5137178716235092 0.7667501580304072  
0.1686543585028965 0.5178291031922659 0.7707106108447226  
0.5317142195902289 0.7260593674114799 0.7958005047016452  
0.5562262344580614 0.7798276024534657 0.7694468093974721  
0.5464667476287338 0.8009342103761670 0.8027132006040940  
0.5586458749620610 0.8338038993329563 0.8045908477401825

0.5778180342512370 0.7922548769193488 0.7384155204574901  
0.5897609447576640 0.8250967396851103 0.7408902042962126  
0.5803303296489186 0.8461142048795991 0.7740524153338018  
0.5656484287292551 0.4592346690888812 0.7423338307690089  
0.5527623619752883 0.4040891530090786 0.7477205425015482  
0.4619335424114090 0.4316547610392645 0.7511446561320682  
0.4272056723661244 0.4756977037587899 0.7413808179369740  
0.4076866348490866 0.4455614558625305 0.7435774518505338  
0.4287433657455408 0.4188780137904149 0.7499983039957396  
0.5736923388568721 0.5217419047577627 0.7437116575146231  
0.5388291284828920 0.5655522498833145 0.7541915446156511  
0.5720142586645520 0.5784024298104916 0.7537200017241340  
0.5931544241216897 0.5518535164619714 0.7468434831273100  
0.4352168329362246 0.5382313305882837 0.7421166971485255  
0.4219365993279653 0.5724008765957609 0.7423054705400389  
0.4479981038204862 0.5932390480677370 0.7496567566080177  
0.5235693401773903 0.4254965616843638 0.7504437484294023  
0.5789092937264066 0.4250624919998798 0.7415537652709601  
0.4771910655539909 0.5717924947447839 0.7521269622226068  
0.5095418311947018 0.5845616382803024 0.7572125104787223  
0.4155106534433490 0.5089833465058444 0.7379335986851958  
0.4911724783243511 0.4126092817077992 0.7543109980977906  
0.5854066397119738 0.4885380692766339 0.7393592821297991  
0.5140454434176133 0.6213100371868271 0.7658763691888252  
0.5114356326136956 0.6456054443329827 0.7340626666897708  
0.5175135221251117 0.6795758066094461 0.7425040714682496  
0.5254821142092989 0.6900849806592766 0.7833507396144967  
0.5269837023723577 0.6659453150133665 0.8155200896016354  
0.5218666655380082 0.6320082545702770 0.8067955534026495  
0.6214511181405604 0.4845692782300063 0.7305124877052014  
0.6431813169827877 0.4692643335877228 0.7592064778542225  
0.6765629597379716 0.4649741744478763 0.7493680472157690  
0.6890182741200354 0.4754948700735431 0.7102903858569256  
0.6673964912760434 0.4907563565566573 0.6815678225407176  
0.6342641818939885 0.4956387572444932 0.6917982771910742  
0.4866826773755596 0.3756766542865325 0.7618774190849781  
0.4801182507350988 0.3640472005824728 0.8027527897850293  
0.4749234055229153 0.3299590669179954 0.8104303555121946  
0.4751449132100986 0.3066085822512450 0.7773227953713523  
0.4819653966124731 0.3180355081568914 0.7365220637985503  
0.4880863790776185 0.3521484938131350 0.7290648630887945  
0.3794400781112349 0.5130209602980056 0.7293707696223035  
0.3663175942730113 0.5024377099478154 0.6905935861756942  
0.3330210114460120 0.5071413679268353 0.6810196305079234  
0.3115933920334339 0.5218507886145870 0.7104183925847946  
0.3244009210491579 0.5319293323765346 0.7495077395110571  
0.3578822271255289 0.5277220335023475 0.7587446674597470  
0.1510432010204494 0.5361498752183557 0.7405938012105159  
0.7243272806367018 0.4707496879285806 0.6971511927379240  
0.7817104598291953 0.4737829725800766 0.7284027419547082  
0.7980992739907551 0.4751936136294252 0.7673601458817674  
0.8325278140517619 0.4751627084405832 0.7691171401918496  
0.8511223558738709 0.4736222424321277 0.7321090416635772  
0.8347880756458167 0.4722505608097217 0.6934697370296382  
0.8002958134272656 0.4723755885010640 0.6911629133136389  
0.4687449540888425 0.2704524639377497 0.7887672245050761  
0.4434725876297900 0.2174103486045101 0.7613056193030786  
0.4217908830861420 0.2055802655925832 0.7300208306661344  
0.4097102786328612 0.1727545865163330 0.7317239779938857  
0.4531239970439319 0.1957568398096887 0.7940783853881741  
0.4408391098534373 0.1629091411910565 0.7951418087204317  
0.4191068074185731 0.1511645124660979 0.7643248844423609  
0.2761532132415371 0.5273694014088768 0.6984059044626212  
0.2197151941928037 0.5279412943452407 0.7324988888040410  
0.2021240051504530 0.5462994880112010 0.7021581103676292  
0.4541357099127125 0.6268127916419234 0.2479069795384405  
0.4025896429142702 0.5993352643821918 0.2972146394982182  
0.4848916316072366 0.3705431389044504 0.2581294531624432  
0.3730672836331547 0.5208720181921299 0.2427921450597537  
0.3805425189058871 0.4543161596159012 0.2554474976975187  
0.5190371359811967 0.6349037383580740 0.2629458989525023  
0.6235443834715050 0.5512755363203767 0.2595924809659759  
0.6314217561945092 0.4848765531685650 0.2461761936429848  
0.5697583968912454 0.6251719721690383 0.2120575500653762  
0.6059739806131015 0.6732992887767419 0.2291891797931711  
0.4758603262009115 0.4994615381283146 0.2522477690482909  
0.6259031540077540 0.6302427909599463 0.3510227988550281

|                    |                    |                    |
|--------------------|--------------------|--------------------|
| 0.5898487910906973 | 0.5814380858378921 | 0.3333148316511444 |
| 0.596147755214043  | 0.4019934468311563 | 0.2964279948915587 |
| 0.6451907572888442 | 0.3665709685280861 | 0.2842427802242692 |
| 0.5284111662191293 | 0.5060199030273062 | 0.2524247712278359 |
| 0.6558621023691884 | 0.4085274369650002 | 0.1601475510207185 |
| 0.6069324600274725 | 0.4455806150380931 | 0.1731770840837356 |
| 0.4135176209630587 | 0.4232412461022858 | 0.3297088661350658 |
| 0.3768919870492479 | 0.3745390892616124 | 0.3458534493849045 |
| 0.3544181543448230 | 0.6001519462936595 | 0.1535201326983974 |
| 0.3981094457407663 | 0.3326773843201828 | 0.2237296991820306 |
| 0.4348024844944182 | 0.3806987168384700 | 0.2081253265580021 |
| 0.4039555480513063 | 0.5645539021350006 | 0.1689570987910291 |
| 0.1778225036468617 | 0.7004884883879863 | 0.2265267875302421 |
| 0.2623857771996033 | 0.2055440320799966 | 0.2485647847647491 |
| 0.6966971524036978 | 0.3618630544808150 | 0.2724478845613402 |
| 0.7323669548686597 | 0.3310807722703584 | 0.3104409561937648 |
| 0.7786114563198633 | 0.2902913490172911 | 0.3141584347123549 |
| 0.8012947392153583 | 0.2646252494007547 | 0.2482801549857328 |
| 0.7766872798767777 | 0.2805967421472416 | 0.1791490471546343 |
| 0.7302579662408188 | 0.3215238023152619 | 0.1754840585243934 |
| 0.3460435167119682 | 0.3227878431148124 | 0.2369656533726489 |
| 0.3019014669857393 | 0.2997262453464821 | 0.2035036756134520 |
| 0.2634430727526481 | 0.2516386273131507 | 0.1950792808424951 |
| 0.3389666338990580 | 0.2564335455462466 | 0.3187342002728977 |
| 0.3006279395572896 | 0.2083341806335542 | 0.3100939924130391 |
| 0.3005149090155768 | 0.6319067119187750 | 0.2640393401535281 |
| 0.2743304667557789 | 0.6834094783336760 | 0.1719649143660759 |
| 0.2187912434506572 | 0.7099834281916244 | 0.1690201131153301 |
| 0.2493647739743239 | 0.6386072448376074 | 0.2913524328738039 |
| 0.1936769333481994 | 0.6644875965326139 | 0.2879307511155022 |
| 0.6582930870462143 | 0.6834265998381950 | 0.2443039369009186 |
| 0.6624867829948697 | 0.7488347282145567 | 0.3275811426020369 |
| 0.7002096809638355 | 0.7976674570911296 | 0.3213385765536990 |
| 0.7026174132897195 | 0.7078912636065012 | 0.2126576638365419 |
| 0.7403977979603118 | 0.7567423206453069 | 0.2065743671499082 |
| 0.7395910797777904 | 0.8020635220394100 | 0.2611076213130038 |
| 0.5498534645355923 | 0.3786727883151124 | 0.2444275592669359 |
| 0.3524709573499256 | 0.6327787762630417 | 0.2826293043748335 |
| 0.4313020066655908 | 0.6145630945926984 | 0.4130943326230184 |
| 0.3902900038620503 | 0.5843797128658685 | 0.4634649477939133 |
| 0.5064496052828833 | 0.3677287655575396 | 0.4247486655796755 |
| 0.3697735648108277 | 0.4950873318607524 | 0.4123282634436392 |
| 0.3890322320746457 | 0.4309810516844630 | 0.4239469307603208 |
| 0.4937205339359929 | 0.6343305059377187 | 0.4273171952974259 |
| 0.6109784859320839 | 0.5710988379566739 | 0.4272649427707678 |
| 0.6304380458466609 | 0.5071738032347763 | 0.4141666170091454 |
| 0.5448885366635479 | 0.6335579560933945 | 0.3778243105267912 |
| 0.5747208065106706 | 0.6866616899165709 | 0.3924949020695724 |
| 0.4748024520942214 | 0.4927940106932062 | 0.4194977645744044 |
| 0.6014641735212175 | 0.6495004617667127 | 0.5151449739688062 |
| 0.5730307378184943 | 0.5953159277361538 | 0.4993876706794989 |
| 0.6095870443881698 | 0.4170453242239842 | 0.4628487810477699 |
| 0.6636548418182079 | 0.3902720607600162 | 0.4491550952523911 |
| 0.5253571280500895 | 0.5092547275922771 | 0.4200865484632646 |
| 0.6672509921425769 | 0.4374953892607399 | 0.3272813815301582 |
| 0.6136480169959495 | 0.4660620306628497 | 0.3421243332099840 |
| 0.4254605374471481 | 0.4060039923094454 | 0.4954248992702519 |
| 0.3963545916037020 | 0.3518903297341534 | 0.5092249583664259 |
| 0.3331854488600531 | 0.5656861412203054 | 0.3270700705463214 |
| 0.4259182176820539 | 0.3156419416046134 | 0.3872374759046794 |
| 0.4563965418698745 | 0.3686791261150694 | 0.3744765720070179 |
| 0.3868375176324065 | 0.5371126572830011 | 0.3416049918926789 |
| 0.1577469074073234 | 0.6667620820384578 | 0.4029961525574662 |
| 0.3000919092892096 | 0.1735971999358827 | 0.4289923438548934 |
| 0.7170378075110958 | 0.4014860511420750 | 0.4365735563095085 |
| 0.7540302736625355 | 0.3684036882313474 | 0.4738469030356060 |
| 0.8087029933008830 | 0.3401208813058395 | 0.4759460540775510 |
| 0.8408460917044456 | 0.3315121045045588 | 0.4095849945642752 |
| 0.8175121025177212 | 0.3521613516583489 | 0.3416099030068618 |
| 0.7629002941716164 | 0.3804215645279452 | 0.3396474002744481 |
| 0.3712935697747178 | 0.2983748234562958 | 0.3994832694686178 |
| 0.3157737758976113 | 0.2764985781983316 | 0.3899133423740500 |
| 0.2809405970556322 | 0.2249178196117982 | 0.3905761645162788 |
| 0.3886148119931672 | 0.2263965361350719 | 0.4666728182513213 |
| 0.3542282571894227 | 0.1747348170096105 | 0.4667606252963406 |
| 0.2811248468087114 | 0.5966022180038520 | 0.4357673051900804 |
| 0.2604061154848336 | 0.6663104219653430 | 0.3655352089459911 |



0.2048463851557788 0.6926943747529509 0.3638426565553481  
0.2231273145164843 0.5883542499188140 0.4471513640080558  
0.1672272244965083 0.6142887985695006 0.4446497632997977  
0.6283819492600974 0.7044757953905166 0.4070314843197437  
0.6094899249838787 0.7756126655083055 0.4750096381820542  
0.6433814716228805 0.8275610715320217 0.4764080151420618  
0.6836501781235098 0.7268360525224277 0.3990083592648500  
0.7180457676722573 0.7786714904861224 0.4010603235962421  
0.6979886603031853 0.8295132561124324 0.4397651012374661  
0.5689490642405427 0.3877288727944778 0.4118037421612796  
0.3360627986466058 0.6111331146844207 0.4499617732553249  
0.4129872565966412 0.6006527368450637 0.5779471157900001  
0.3761727793930189 0.5633453887715030 0.6254478634605722  
0.5282598703857896 0.3702237345897198 0.5875037793402497  
0.3724677001893503 0.4722177746589701 0.5738285408097892  
0.4021574342069308 0.4123327098625862 0.5850146276241368  
0.4712592732237801 0.6308041549077464 0.5920901503740822  
0.5975529165156060 0.5888223879249492 0.5892301867161311  
0.6273374286879383 0.5290847544176031 0.5771277425911044  
0.5195261401196611 0.6389511892804292 0.5406218608539561  
0.5401170458803844 0.6966352278041190 0.5538995243252818  
0.4762621788447898 0.4882350247307118 0.5823588489340367  
0.5778208533724724 0.6651179433971146 0.6742606838500806  
0.5588706512225999 0.6065928753524000 0.6598561219683420  
0.6224137790959320 0.4362596005751866 0.6255299473600615  
0.6799541504986053 0.4191119211149174 0.6107424421445575  
0.5234456229672390 0.5130409716013007 0.5833412634396967  
0.6748188223163970 0.4675753937696195 0.4897253505272499  
0.6173332004075337 0.4862365334906766 0.5055128953902516  
0.4406821209482405 0.3933376484447620 0.6560610092371266  
0.4216788951855198 0.3345694722550573 0.6687483079429508  
0.3258560983957579 0.5339928920773911 0.4876173004833835  
0.4592047938376864 0.3052923665867514 0.5474231222674216  
0.4798717977188014 0.3631894442354144 0.5358366567319394  
0.38371449221122954 0.5167273852373707 0.5035395688600411  
0.1313049387962220 0.5868693041670420 0.5622005080405220  
0.3665625511203289 0.1387480794047226 0.5897453083018717  
0.7304953063018530 0.4402238058822645 0.5978583506839236  
0.7722301550002650 0.4119060079942156 0.6345635201524193  
0.8311693473475205 0.3945317454270691 0.6363448102711933  
0.8645785621563492 0.3941110768230028 0.5701533024510518  
0.8380355771755519 0.4113792332829158 0.5026619970686660  
0.7791727879398890 0.4287560653352691 0.5009781624031578  
0.4088675482733264 0.2762893285942264 0.5590945371675972  
0.3617467988395903 0.2415415572333083 0.5458354453536032  
0.3387281080950776 0.1835473909527437 0.5473445564646143  
0.4398303711699646 0.2109665257606688 0.6299284307450345  
0.4174992356045889 0.1528744508215696 0.6305057938756649  
0.2682057529722376 0.5514593194698745 0.5956426441709846  
0.2309020430982314 0.6147263679126184 0.5276640183857785  
0.1705673171380615 0.6256355977002004 0.5257383600911743  
0.2140031562278294 0.5266388088405463 0.6038793755209240  
0.1534203687015891 0.5372044277168544 0.6014681612971911  
0.5900526526317935 0.7256380531726533 0.5660982122431368  
0.5583233607510477 0.7891086575221153 0.6387844960411615  
0.5795953923548318 0.8475685362107992 0.6409642484436220  
0.6368304600413254 0.7614804763150557 0.5537425420566023  
0.6586745729532559 0.8199009901395263 0.5566369084441832  
0.6300925164426409 0.8634293252390635 0.6002799032335591  
0.5866736675941339 0.4006098110367939 0.5754798406658346  
0.3180463760807910 0.5787893041013525 0.6105497722372831  
0.3962112414319322 0.5794634859167913 0.7377711635762334  
0.3675879143042861 0.5360663557918476 0.7890309511658543  
0.5529552450742916 0.3767634948520506 0.7495448826818092  
0.3808956680035208 0.4447953580963332 0.7412636822929779  
0.4222283658428886 0.3925122229682550 0.7535700205719551  
0.4477291892510416 0.6204981581607640 0.7525754369843592  
0.5784615583702845 0.6047264478152641 0.757934064127101  
0.6199532622382765 0.5527122290901891 0.7446626921321070  
0.5050013486758591 0.6377721365984785 0.7022048236293454  
0.5156877691196828 0.6977944062291183 0.7168669245755503  
0.4793025740504767 0.4822696651517628 0.7460582404438330  
0.5323392977747400 0.6744985591023624 0.8474105803778313  
0.5237337905269465 0.6133803282374137 0.8319520689060015  
0.6336979923025055 0.4605037845629983 0.7894264433615129  
0.6926089612693657 0.4522365411371562 0.7720342697374419  
0.5215925253182545 0.5150051264378599 0.7475926400136650

0.6769554041837056 0.4985519663478225 0.6509957273846328  
0.6176735329372897 0.5075487309453739 0.6691369549757507  
0.4791886850935368 0.3820738930715520 0.8286676626613892  
0.4704297450470686 0.3206759169270897 0.8422119167302181  
0.3232343118652051 0.4996610305094820 0.6504367954743950  
0.4827989347975215 0.3004693181404560 0.7100970126203240  
0.4935904434333707 0.3606903100605480 0.6972125934493313  
0.3827674405307511 0.4910145413963929 0.6673827440094223  
0.1243467769639054 0.5394783778486724 0.7436899971008448  
0.4095468186775953 0.1254726974635039 0.7656980264024441  
0.7368433737896982 0.4805262329884285 0.7575992884101924  
0.7836646629229470 0.4762936585215353 0.7964181667152819  
0.8448660774659670 0.4762988480111024 0.7996189411383209  
0.8781068709385520 0.4735749443538655 0.7334338730936386  
0.84897142440029211 0.4710896226808213 0.6642864715025969  
0.7877083332946558 0.4714396988148310 0.6609963059162902  
0.4477055503546650 0.2628729622980837 0.7306399282572060  
0.4145296881984762 0.2223543157209329 0.7043810995378003  
0.3927033098791263 0.1641278487059887 0.7073221772206061  
0.4697410104285502 0.2049398055810835 0.8183782040124864  
0.4484743331663278 0.1463107654090746 0.8207501859908594  
0.2643813703600086 0.5140069411438759 0.7580257907906727  
0.2151219312181140 0.5572914778318141 0.6755604604367871  
0.1545755090033331 0.5647536618629886 0.6829192219798136  
0.2164428881562175 0.4993512476587723 0.7903746855652848  
0.1558310661156099 0.5066390777901555 0.7974966142909879  
0.5520128328465129 0.7349297671755469 0.7375281022223708  
0.5299085208307477 0.7913251046581586 0.8268199127430784  
0.5509657016016538 0.8499732806557856 0.8306035247610757  
0.5851046185333998 0.7759026306369402 0.7123624395724032  
0.6066920459094612 0.8341758559572156 0.7166522617392315  
0.5897815438167174 0.8718222360646248 0.7760354642550420  
0.6046730784908624 0.4180861563969356 0.7371863873765415  
0.3084508437485275 0.5442580460830373 0.7726072132565651  
0.2964912782676749 0.6433675610534793 0.2357265367957299  
0.6586188685071276 0.6971966396705247 0.2712894494173793  
0.5080629722015997 0.4518787983212880 0.2514774274836715  
0.4507390792935524 0.4964918206734127 0.2516520188867638  
0.5535367195890000 0.5090571639479076 0.2525398878843046  
0.4962596600026353 0.5536928201847519 0.2524216704140553  
0.7017257121215522 0.3519226923470561 0.2434818186564101  
0.3447668148493278 0.3088670920989049 0.2637739249036166  
0.276694539431060 0.6100789205085347 0.4088509434107842  
0.6254607985890520 0.7180661359416067 0.4341631317508998  
0.5148735330467606 0.4520574708428684 0.4192414726567645  
0.4505926853732163 0.4853083482293688 0.4191788678793841  
0.5495553078617285 0.5167747108393687 0.4203320579987750  
0.4852131172530224 0.5500846755024044 0.4202897942755517  
0.7235147833687505 0.3918648767316241 0.4078198160719303  
0.3736716485212531 0.2844097019993443 0.4264126567716444  
0.2605679522023506 0.5632049897697184 0.5686495542816304  
0.5846656634406562 0.7380107893961682 0.5935768039224792  
0.5227043048652912 0.4547868147521528 0.5822039480072768  
0.4536772870311320 0.4766296371840456 0.5817883435513467  
0.5460454770704101 0.5246236540627912 0.5835219366775976  
0.4770177963387769 0.5464469950476504 0.5831546871892295  
0.7383625474719698 0.4316193280102090 0.5691735855353628  
0.4143473807519909 0.2633378476183625 0.5861200293538694  
0.2543301726826480 0.5236503456795301 0.7312634031498821  
0.5454300850762294 0.7462071125081671 0.7651812714379893  
0.5319648298209995 0.4588668488793362 0.7472767795093983  
0.4596763049699565 0.4660149451300437 0.7460148900118723  
0.5411797987783946 0.5312952103278776 0.7482879152570769  
0.4688502062510244 0.5385036436077691 0.7476164027949713  
0.7468285413653472 0.4746987390883440 0.7291333340631596  
0.4544516111262642 0.2510286269241044 0.7578480539792293  
0.6895694677569155 0.3572155991786140 0.1728297490274352  
0.3600848380944953 0.3108166515077688 0.3337343363876281  
0.3159249067526124 0.6476118986385597 0.1677079129623021  
0.6411607984938422 0.6947030939708210 0.3404296593481251  
0.7063264488415454 0.3861093501675682 0.3388708831490638  
0.3912593453309073 0.2862484572814358 0.4953614897855573  
0.2939438141597741 0.6175273171284714 0.3402318570678695  
0.6061607866811960 0.7154330508432319 0.5023692209130312  
0.7221123947045087 0.4231447289613480 0.5003302893228474  
0.4304295371761227 0.2697099499720464 0.6553576723311354  
0.2758155370206209 0.5760970671000243 0.5006122011948234

|                    |                    |                    |
|--------------------|--------------------|--------------------|
| 0.5691820292280300 | 0.7301407382665934 | 0.6627916651790305 |
| 0.7320329582838865 | 0.4644747922445742 | 0.6601306116423196 |
| 0.4755082001570801 | 0.2599355872497251 | 0.8243850256862892 |
| 0.2677018767639853 | 0.5344770436207210 | 0.6619168432702918 |
| 0.5253222007986071 | 0.7357794680303408 | 0.8318746619203781 |

C-CENTERED PENTAMER

```

1.0000000000000000
40.3491769999999974      0.0000000000000000      0.0000000000000000
  0.0000000000000000      40.3383690000000001      0.0000000000000000
  0.0000000000000000      0.0000000000000000      36.8000439999999998
  H      C      N      O
  250    360    40    20
Direct
0.4539248376436968  0.6248874837913813  0.2140059453132374
0.4028143854661482  0.5975703339032445  0.2569802781065351
0.4857492466781002  0.3727042398372994  0.2232222384424609
0.3731849157937699  0.5203753436532376  0.2093036924408248
0.3807606270290171  0.4548093790869724  0.2197099631546312
0.5189140849252730  0.6332296314352432  0.2264646052381869
0.6241494231111538  0.5511498208808095  0.2233067437041950
0.6319924941954850  0.4857213091701653  0.2123076698712683
0.5687946023135605  0.6245447449042258  0.1825358293512855
0.6049862484616889  0.6719988926688053  0.1970304188550807
0.4761561262329543  0.4993422711968439  0.2176505641385869
0.6274601999772066  0.6286887696488438  0.3012706745962566
0.5912910520423573  0.5806213201225613  0.2863254813631745
0.5969734501365340  0.4046239168922443  0.2568416920194238
0.6461468339101429  0.3697081925303152  0.24660562929383413
0.5288367425177255  0.5066889658092192  0.2176131923470033
0.6562836730750357  0.4096766251666681  0.1387087192110447
0.6072981166779735  0.4462251966385214  0.1496636441393915
0.4126231567228157  0.4242617251958924  0.2833746105962838
0.3760162508594106  0.3760968337527602  0.2965294457723194
0.3539568831927861  0.5986070626998499  0.1330773270576385
0.3998892849261385  0.3347134477566998  0.1917287753706536
0.4364904762546570  0.3822656783156195  0.1789994667466739
0.4036269783232603  0.5635182662551179  0.1460649831425679
0.1767832458915520  0.6957842318952956  0.1974789653703097
0.2630740848052197  0.2094065831085921  0.2120826659708021
0.6982021635384595  0.3653267920820314  0.2360815267443201
0.7346243528852042  0.3358622619830700  0.2688663879359164
0.7804100476193019  0.2951432098478876  0.2722008484467285
0.8016365246740382  0.2681512426412967  0.2155115614149551
0.7761503822458269  0.2828599321666102  0.1558706678525759
0.7301905371706465  0.3237448229799734  0.1525859295274234
0.3473711522281390  0.3245143710356018  0.2020709181720988
0.3033315235449392  0.3017050419404025  0.1728140143727389
0.2646859015516970  0.2544730910383363  0.1655144421098211
0.3394050837765686  0.2596549343184045  0.2731570036435652
0.3008766993614458  0.2124149047479414  0.2657007635504962
0.3005311206796893  0.6296785779295521  0.2290465690732020
0.2731662347318415  0.6796829121098107  0.1493882637350377
0.2172393108071022  0.7052361211713878  0.1472409303481030
0.2495564635304856  0.6359864638241696  0.2531749510150143
0.1935066810303463  0.6608605732993765  0.2506274924738299
0.6575647446876760  0.6820021305902806  0.2087282627694337
0.6629279377659973  0.7461709564145976  0.2808520011000291
0.7002310586727429  0.7945507546091267  0.2745720552161968
0.7016096235974475  0.7061061211296491  0.1806859048415988
0.7389347701609286  0.7545103636655272  0.1745374515222036
0.7386088907020902  0.7991487565900711  0.22160330013873616
0.5508311858821008  0.3810812718131867  0.2119599257771305
0.3525825469527758  0.6305445534644440  0.2447347605139828
0.4328741328400029  0.6129007893246242  0.3557891462561320
0.3918955643336902  0.5832370491848208  0.3994271319218172
0.5071226641335157  0.3695064306192075  0.3657498568762722
0.3707683272123605  0.4954868273691950  0.3547458963903528
0.3899219292531863  0.4322979732726252  0.3642381042206687
0.4955632621237040  0.6319706192777419  0.3675240791408036
0.6127001772907342  0.5691978587558338  0.3667998505879875
0.6319967025998590  0.5061815894580421  0.3560206591504534
0.5463207231373101  0.6313555002805922  0.3246006277190975
0.5764640149408717  0.6833952184941317  0.3375260817859919
0.4759595121760474  0.4929686112926053  0.3602462719279591
0.6039899106439413  0.6458547961285092  0.4428709973312856
0.5751631455786576  0.5927550766907383  0.4290237024150210
0.6104255869653110  0.4175521735902388  0.3988608790372044
0.6649844619258460  0.3917231993232755  0.3882028120268164
0.5267775958961076  0.5085010896643994  0.3607094533073765
0.6701378727944800  0.4382672605702411  0.2829947345483504
0.6159053227747220  0.4657912947057904  0.2946020434645406
0.4260440007649539  0.4078371922807228  0.4258220755835131

```

|                    |                    |                     |
|--------------------|--------------------|---------------------|
| 0.3964332331915772 | 0.3548061734115988 | 0.4377948138079514  |
| 0.3335217303023345 | 0.5650086075518117 | 0.2822325490382959  |
| 0.4262635015775879 | 0.3186255996279116 | 0.3326293871348831  |
| 0.4571319287523350 | 0.3706058607625605 | 0.3215613877362567  |
| 0.3873549442551340 | 0.5368626049321127 | 0.2940913846742530  |
| 0.1582682603409361 | 0.6643730490080588 | 0.3460220187545278  |
| 0.3000278770614254 | 0.1791198165150977 | 0.3683281714342009  |
| 0.7185210011614568 | 0.4025488208607249 | 0.3787378323375130  |
| 0.7539118651187906 | 0.3669069100337819 | 0.4107219453982918  |
| 0.8085254387084855 | 0.3388307316612181 | 0.4130207798488341  |
| 0.8426567676209308 | 0.3333085305878019 | 0.3566088836032741  |
| 0.8214045005814195 | 0.3568060242775314 | 0.2983323711692309  |
| 0.7668130373954911 | 0.3848108971903247 | 0.2961093006543048  |
| 0.3716541551492167 | 0.3017628396798992 | 0.3428501679414356  |
| 0.3157069127732025 | 0.2805042044564094 | 0.3348589186810834  |
| 0.2808089356681588 | 0.2297447534180278 | 0.3353316606258944  |
| 0.3887973014601678 | 0.2309421891414744 | 0.4007650983248761  |
| 0.3543583966236232 | 0.1800994374039432 | 0.4007355027099437  |
| 0.2817921548374285 | 0.5957193953353517 | 0.3765354295412072  |
| 0.2619756455503949 | 0.6652893088744838 | 0.3173665320206871  |
| 0.2062922352743788 | 0.6910748066792678 | 0.3148326108903907  |
| 0.2229842671308469 | 0.5863700165643201 | 0.3837595762613217  |
| 0.1669685178820518 | 0.6117349666837832 | 0.3805498266305997  |
| 0.6300887084051814 | 0.7010072934533462 | 0.3494530674929275  |
| 0.6107646524649443 | 0.7703379103594735 | 0.4086503706644804  |
| 0.6441457707988124 | 0.8218651597714278 | 0.4102518997348971  |
| 0.6856576025525276 | 0.7235087341037953 | 0.3427863104072454  |
| 0.7194582598124333 | 0.7749726930421491 | 0.3448377515791170  |
| 0.6987690693427371 | 0.8245879782608018 | 0.3785923268955752  |
| 0.5699138950449248 | 0.3887241210100573 | 0.3550043188790215  |
| 0.3375153454477346 | 0.6097134865879947 | 0.3884128380341388  |
| 0.4116546643877556 | 0.5988492475476347 | 0.4940830626100214  |
| 0.3762258191220270 | 0.5631565499244116 | 0.5375931021456416  |
| 0.5275449028563212 | 0.3723214548170249 | 0.5056296596032681  |
| 0.3711970385574864 | 0.4723207415959171 | 0.49437872224000823 |
| 0.4010795499201719 | 0.4135102696994781 | 0.5044406711950663  |
| 0.4698780832212918 | 0.6288643863684861 | 0.5058981639459800  |
| 0.5963503089540848 | 0.5876849721999922 | 0.5062373086639347  |
| 0.6263316785442183 | 0.5289617161989436 | 0.4959716744701269  |
| 0.5195375984716135 | 0.6369967176898068 | 0.4632280264055324  |
| 0.5404219932198995 | 0.6935851343638439 | 0.4751002178171879  |
| 0.4751857754519362 | 0.4882700797606783 | 0.5003166631762626  |
| 0.5755950027858103 | 0.6624419951787047 | 0.5801728606409225  |
| 0.5562003273913398 | 0.6050425514780585 | 0.5674184122463540  |
| 0.6213318553409685 | 0.4378458749455461 | 0.5386322615406858  |
| 0.6793041612879908 | 0.4215618550335456 | 0.5266810884375873  |
| 0.5223153354111827 | 0.5129182532704667 | 0.5011026778565646  |
| 0.6746693210782262 | 0.4685428839558435 | 0.4216678192870254  |
| 0.6168385356226674 | 0.4865033133845048 | 0.4345477489861237  |
| 0.4406810126229942 | 0.3951986810284663 | 0.5656925226125009  |
| 0.4215705301568956 | 0.3374672544607318 | 0.5772188163508658  |
| 0.3229960609794137 | 0.5330842891753033 | 0.4203674306551065  |
| 0.4576727190642255 | 0.3081660178293162 | 0.4718546883154632  |
| 0.4784234163587138 | 0.3650389156955490 | 0.4613117838843557  |
| 0.3808942928421226 | 0.5152021067317890 | 0.4331398756170385  |
| 0.1310516337472822 | 0.5941843896308774 | 0.4871341571455784  |
| 0.3616945037329026 | 0.1461963989268337 | 0.5071580180338472  |
| 0.7302560149119264 | 0.4436404137133255 | 0.5155389175303050  |
| 0.7727750506621214 | 0.4205126854607797 | 0.5488017133026692  |
| 0.8315907709504770 | 0.4029898100014284 | 0.5513511136558077  |
| 0.8643561165629450 | 0.3970233741291262 | 0.4939954192466662  |
| 0.8372554431792161 | 0.4092635686585107 | 0.4344783706224645  |
| 0.7784537098734502 | 0.4266518274665827 | 0.4320347121553846  |
| 0.4072582055531106 | 0.2806571985382413 | 0.4824201766672140  |
| 0.3601230206029292 | 0.2475639751258102 | 0.4694958405232646  |
| 0.3357000522606381 | 0.1910843115853257 | 0.4699583853138070  |
| 0.4359410123775631 | 0.2153722057003782 | 0.5441430528790034  |
| 0.4122462506692083 | 0.1587942321456899 | 0.5437637223715273  |
| 0.2669536911228699 | 0.5545510115788536 | 0.5143024767312934  |
| 0.2305900820268551 | 0.6142447544802674 | 0.4503605637114581  |
| 0.1706776303207319 | 0.6272469851978948 | 0.4496867278907499  |
| 0.2128441897807654 | 0.5359652461810736 | 0.5277726068878323  |
| 0.1526063396210038 | 0.5483143125617407 | 0.5262515925244257  |
| 0.5913107615013710 | 0.7206573903310275 | 0.4866618203886280  |
| 0.5613101351053663 | 0.7851807341944317 | 0.5483035102506302  |
| 0.5855732889604363 | 0.8415068661102006 | 0.55026347050007861 |
| 0.6397262482353911 | 0.7534234378353488 | 0.4767539224781895  |

0.6646443963573412 0.8096715856633525 0.4795076525014277  
0.6376528577949516 0.8541762977599245 0.5163656606024607  
0.5859485243536625 0.4023716551623637 0.4950550858731935  
0.3181161570540320 0.5793016259709008 0.5257436595423929  
0.3960626866159526 0.5816905985773057 0.6344711202509713  
0.3673454752230637 0.5390131774908448 0.6776413636743739  
0.5505577298555706 0.3794309660575504 0.6432527275093697  
0.3789361565278753 0.4500709615927314 0.6334186058387558  
0.4188230916670834 0.3974287758059327 0.6428891610208204  
0.4481730040181737 0.6215840723608729 0.6458235905296179  
0.5798487351827293 0.6035544700702079 0.6446211553763959  
0.6197867816432723 0.5511754376021128 0.6339652414090314  
0.4955518250809529 0.6384820871563234 0.6021761819040259  
0.5067748504876840 0.6978095167926779 0.6138990588323937  
0.4784748180700580 0.4841656647304366 0.6390836374027424  
0.5473343108079648 0.6730758196488072 0.7186838943122864  
0.5378463635277615 0.6131915535228215 0.7060279524089722  
0.6313595045577969 0.4598291844609751 0.6752616891304153  
0.6912540888448672 0.4546402234382987 0.6629093211059816  
0.5202973069502890 0.5168406879170090 0.6390852162666515  
0.6777673235267555 0.5021567848639590 0.5591155534341807  
0.6176393493930914 0.5088196858942449 0.5723698768080631  
0.4614235160930030 0.3860658135504547 0.7037970886151488  
0.4524393978967001 0.3258294027801583 0.7147187879890815  
0.3210658516042477 0.5022824246166661 0.5591105882363832  
0.4922831144808862 0.3040062414156470 0.6088372238026430  
0.5030314600173060 0.3636780610906428 0.5988137448396966  
0.3812071025885662 0.4951687392190292 0.5720175536391768  
0.1211037009268058 0.5227301173969676 0.6253898480653476  
0.4307279293264101 0.1262821073444703 0.6477967193366200  
0.7370818477487812 0.4854228829601202 0.6528059883544781  
0.7830593023148135 0.4656430752390570 0.6846456984487326  
0.8441975820519774 0.4596962866362213 0.6866806445977529  
0.8776016205279337 0.4659752336787475 0.6298559546122120  
0.8488226038354927 0.4785564950520423 0.5714154905664515  
0.7877472146210219 0.4845317603324998 0.5694743295868070  
0.4478963411951534 0.2669918396930381 0.6195382538335128  
0.4059022235282747 0.2248692548842220 0.6110904990286465  
0.3936334954393405 0.1645720017129650 0.6132163111960217  
0.4917891998918573 0.2094747238650744 0.6786671579849457  
0.4800700215890331 0.1492010748476189 0.6801066031514872  
0.2621551567833368 0.5094496474630890 0.6530797563987534  
0.2151266692133917 0.5666886922502998 0.5970240579807995  
0.1537224305182059 0.5678288195812330 0.5957963310212030  
0.2124070781558605 0.4758942159905005 0.6586853683274698  
0.1508407741480491 0.4766139417552908 0.6569103662790285  
0.5514043435168150 0.7338914564540281 0.6251291964412448  
0.5099117211147178 0.7905371783687852 0.6876961870143400  
0.5225160599013199 0.8505713053448979 0.6905141802987622  
0.5926982586945795 0.7759041216738245 0.6154056355201118  
0.6058482282454869 0.8359552174236121 0.6188174705878338  
0.5707918432839769 0.8737520500500838 0.6564989966900174  
0.6026239689132638 0.4194064801454095 0.6322903264370429  
0.3072529964559805 0.5443803223573397 0.6656119559552169  
0.3835987032762727 0.5586389374375598 0.7749686252312459  
0.3625173137388217 0.5120555908045870 0.8189024857375876  
0.5720492768022196 0.3883476911440182 0.7838806788434706  
0.3908996175034417 0.4251842451019590 0.7778693065849605  
0.4404823925593419 0.3816437558067617 0.7885405775863960  
0.4278074376116949 0.6070764973984413 0.7873465578813120  
0.5594966815228826 0.6137341834708397 0.7903717634543869  
0.6089796518797060 0.5703300594434351 0.7784918216477028  
0.4799565093283062 0.6339044994277703 0.7437677035191349  
0.4818465769695233 0.6938724745733749 0.7567400945007468  
0.4815886478937996 0.4785256831919241 0.7817088922149458  
0.5062853230097119 0.6732405688952631 0.8683785803180953  
0.5065025997589143 0.6125637078078746 0.8546714143023013  
0.6380787571157885 0.4823254958756711 0.8165067263262601  
0.6976007591057961 0.4859964641116098 0.8019120384268692  
0.5182513687754707 0.5170290425341201 0.7817900924456060  
0.674039406054449 0.5305785304106674 0.6985917187286396  
0.6140104809080785 0.5274637083757948 0.7137865826427732  
0.4944635444673710 0.3813982591359575 0.8524431394976558  
0.4948504170873664 0.3203820027453562 0.8643860575653084  
0.3244588250891847 0.4679497263025171 0.6998371781054417  
0.5175847836355849 0.3024591628194805 0.7517490061586382  
0.5192887636666862 0.3626898098552813 0.7404975430596897

0.3847012813932962 0.4698984019480884 0.7141539792063982  
0.1219265986999448 0.4687715522239854 0.7794389306789944  
0.4701175302900577 0.1205986971432448 0.7971581212152298  
0.7351429447909598 0.5231275951688499 0.7912860492404258  
0.7809136296459883 0.5279918025444559 0.8261046239002632  
0.8409617717318996 0.5396443248883650 0.8309373531933368  
0.8756088520391176 0.5440535345252792 0.7748381637766008  
0.8490256157856919 0.5367689508811967 0.7141136048477437  
0.7888369275879087 0.5253721324322499 0.7091873249702920  
0.4873588518932485 0.2601951368164585 0.7675650536049541  
0.46284254697985358 0.2152713561603622 0.7430286242342844  
0.4506827368957886 0.1551385909640954 0.7448246060989647  
0.5134802846258077 0.2078725460925603 0.8459467755714313  
0.5018631570437323 0.1474510750746724 0.8473444618758302  
0.2642695435439656 0.4729524672814081 0.7933515733589610  
0.2078529551738504 0.5047158614359692 0.7216660331153648  
0.1469724466787675 0.4995026812391769 0.7273310040740446  
0.2198810363893342 0.4488413333118462 0.8208124351210477  
0.1589455045384744 0.4436094501436845 0.8263777644049700  
0.5129313095399980 0.7359110096841454 0.7736201708140661  
0.4862210188784417 0.7861062943357421 0.8533705704021554  
0.4985722098281481 0.8462751646397830 0.8573515480615989  
0.5385452586959483 0.7813004969919518 0.7512895255451634  
0.5514507594326454 0.8411796150522585 0.7556710949995740  
0.5316078219618676 0.8742627070113305 0.8089352031558505  
0.6161356291652993 0.4370235829923262 0.7719452235496856  
0.3027725238636427 0.5096770160306586 0.8050461350346781  
0.2241371793920518 0.6899738608157797 0.1705628162779083  
0.2422694710544550 0.6511230385485106 0.2298687324625668  
0.2108268186105413 0.6652971603475587 0.2283570023874276  
0.6408931185966297 0.6819591397432757 0.2606495149394917  
0.6797675304392404 0.7230358957431113 0.2311753402257782  
0.6795271107596870 0.7480327656862477 0.2576722983413208  
0.7007391408698895 0.7751509832175396 0.2538867390058859  
0.7013322124471852 0.7256353343176658 0.2013059567461694  
0.7223496266513552 0.7528361468783231 0.1979021456838061  
0.7221841352600130 0.7777913067380596 0.2242455324483382  
0.5377070150130171 0.4358463062760217 0.2135511114200429  
0.4989903259986057 0.3959811113307328 0.2201868616597584  
0.4349520018435379 0.4665724702656724 0.2206565381723285  
0.4285195160452980 0.5218036867654239 0.2123126244292300  
0.3962498913583979 0.5068818590842500 0.2126938686363467  
0.4001364044477452 0.4734138154915785 0.2181439188936709  
0.5765996165431057 0.4842758576649517 0.2133280520775863  
0.5699524675546453 0.5394107587367371 0.2223254602401576  
0.6048114866960237 0.5325921967247008 0.2207795568536975  
0.6088418586493964 0.4991885186581442 0.2150086407390618  
0.4673382155692204 0.5702073514868147 0.2140236170558035  
0.4728455580923426 0.6058393947334904 0.2162991553004840  
0.5058032650861659 0.6099994485212771 0.2224825280363214  
0.4844602192059569 0.4290785663512151 0.2207298096375505  
0.5320292414958551 0.4001857848072201 0.2146586835061539  
0.5204299447833682 0.5769171980757211 0.2223233798389601  
0.5548015131330528 0.5707173639758121 0.2257258925749349  
0.4356389877573827 0.5558917116091063 0.2098391640654169  
0.4500476058558220 0.4352160566296157 0.2237089805812707  
0.5695313630406885 0.4501878821848357 0.2103174270925289  
0.5774041258976118 0.5991396649003431 0.2333750386003544  
0.5818902172014151 0.6251614526832598 0.2084832086682243  
0.6027034953436764 0.6517449871286478 0.2166156162462160  
0.6193943894165416 0.6532434590551833 0.2500821918144517  
0.6149194665784125 0.6273784449172941 0.2750433338418526  
0.5945684111349899 0.6005981296109211 0.2666186429242277  
0.5987150303871425 0.4281041267626101 0.2041327884774879  
0.6100332211957282 0.4060871405818391 0.2309170359109519  
0.6380389505851516 0.3864722542560027 0.2250617925843955  
0.6551197073881446 0.3879173726159048 0.1919174121988093  
0.64341424221887271 0.4093788155240226 0.1647878447501393  
0.6159463068689108 0.4294438867285210 0.1709368383313043  
0.4273000080951216 0.4066811164503622 0.2302981466356700  
0.4096001040137437 0.4046660112648423 0.2631640737520279  
0.3890007732441227 0.3778238281815542 0.2705869343725211  
0.3847870644831788 0.3524573305089362 0.2449652844649602  
0.4019932645649740 0.3545383864609521 0.2118501517985775  
0.4230502365984278 0.3811779046597868 0.2047167657117348  
0.4065290510471726 0.5778704589738096 0.202553799100368  
0.3924273541548165 0.5783699651357651 0.1676356548521920

0.3646093567823477 0.5976063910055588 0.1603151059420722  
0.3493826867698094 0.6161417862309743 0.1879312445330661  
0.3635308070692348 0.6160200811578042 0.2227349184256813  
0.3920316981861465 0.5974142261160745 0.2297789574181556  
0.2014787101959334 0.6847889960228918 0.1986665391816488  
0.6842146146240994 0.3663010798637967 0.1823541660802090  
0.7292880123237601 0.3322565184168942 0.2105121895370244  
0.7437439280719884 0.3240096119378941 0.2441198299133724  
0.7695684054236521 0.3011709172022932 0.2458252275408060  
0.7814425694572350 0.2861170824492564 0.2141706351032839  
0.7671105041720993 0.2943765840629245 0.1808435323506851  
0.7412390271937543 0.3172689621846959 0.1785711379365595  
0.3628364336452265 0.3237570187997227 0.2544439467229607  
0.3238966070631820 0.2837300784023760 0.2234973845669325  
0.3027437895844267 0.2819827783281043 0.1932080021332034  
0.2810069075989557 0.2554281854997776 0.1891530821957791  
0.3230921829934216 0.2584746007165339 0.2496827482052804  
0.3011927715657077 0.2320008340995753 0.2452263791766942  
0.2800829788212643 0.2302444891603359 0.2152150650188851  
0.3190903277308626 0.6356099865411524 0.1773444787751208  
0.2649462169150082 0.6561693927827010 0.2013625621319651  
0.2557409041458262 0.6759067350128588 0.1715177042580882  
0.2096988010259982 0.6679639650389549 0.3298163074318888  
0.2190470086398429 0.6091915520745986 0.3684134373978789  
0.1877017290008749 0.6236925582427242 0.3667124595079446  
0.6102340185428005 0.6993855680002944 0.4009987667304887  
0.6461778683686536 0.7436663534756298 0.3756680289202633  
0.6345345995791369 0.7714220725936248 0.3946975638616769  
0.6535102305742876 0.8003266388797257 0.3955236784062147  
0.6767914727658333 0.7451725916587197 0.3576672275914211  
0.6955812427513930 0.7741783448844332 0.3587724149955119  
0.6840527457792109 0.8018939127247858 0.3777194838142800  
0.5477916255360475 0.4405592620331991 0.3568081020544476  
0.5163219749379699 0.3946812922928711 0.3629710299176229  
0.4412538460788551 0.4532987716726142 0.3637439890367395  
0.4250673397354336 0.5066107508712534 0.3560664877918363  
0.3959379617297983 0.4862671540848037 0.3571800776321770  
0.4057430608014732 0.4539621439511185 0.3620871893191023  
0.5776912883684694 0.4949964088743094 0.3566670189773188  
0.5614171345939226 0.5481441012443747 0.3653462039076470  
0.5969398757562335 0.5475441955594447 0.3640130466790880  
0.6068078560350793 0.5153419159276886 0.3584570023850258  
0.4549294800489565 0.5610405246911615 0.3573568166176675  
0.4545522960905702 0.5971584010989246 0.3586073106862304  
0.4863754505699238 0.6068264298697102 0.3644129060686630  
0.4964453984709734 0.4248528006047820 0.3636154039902325  
0.5481924746358257 0.4044299353256045 0.3576780038584110  
0.5062110790540182 0.5766108393481297 0.3650123920273852  
0.5410994275353911 0.5764065974629564 0.3684943893203035  
0.4260576336309589 0.5414616817989573 0.3537769887485594  
0.4615149839582786 0.4249617665338552 0.3665560233702657  
0.5766918124868402 0.4601776934390244 0.3537531152759203  
0.5586373933896188 0.6082834977821199 0.3758224273445022  
0.5591381910658467 0.6343232688917602 0.3505143248988686  
0.5762432552009462 0.6636399008594820 0.3578202886522298  
0.5926325127965264 0.6679605527220458 0.3911003406312170  
0.5917427227401286 0.6422590161920131 0.4167276763540270  
0.5754370341454287 0.6127032939702420 0.4089646154254206  
0.6092469692902004 0.4435749002630346 0.3475627669290620  
0.6235077904749021 0.4223452472508559 0.3734448892235751  
0.6544309537872278 0.4078769885664319 0.3673942813708111  
0.6715599904799950 0.4136807136577342 0.3348518591934838  
0.6571448296248484 0.4343931216750923 0.3086448765975607  
0.6267208889806253 0.4494951059568781 0.3151248165807684  
0.4437845805524324 0.3929941347226572 0.3728529959684548  
0.4261398897618709 0.3881937521181928 0.4054030220208972  
0.4093819695803285 0.3586748243992699 0.4121072223833950  
0.4089081178024485 0.3333795469411102 0.3859890478879839  
0.4261668166480143 0.3380592104291755 0.3532958346227318  
0.4436878950052064 0.3673418368516648 0.3470456815301416  
0.3935464206634788 0.5581708077814119 0.3475864369111403  
0.3764184862031557 0.5529001097073929 0.3147874684989108  
0.3462061394717726 0.5683660323686242 0.3081592256789744  
0.3316714645540269 0.5888028519671115 0.3345499022627708  
0.3483299520487068 0.5938003434246427 0.3675355431031993  
0.3790738854860255 0.5789782891242612 0.3737376674054992  
0.1828266505515203 0.6530881770037728 0.3473658750946955



0.7038832221249020 0.3974003965351597 0.3255364379315048  
0.7566695514068007 0.3773249511278688 0.3532002867630936  
0.7687429933608766 0.3643737827179087 0.3860682143721854  
0.7995116452557666 0.3487201534013753 0.3872368494111648  
0.8186248907567694 0.3457135403025507 0.3557366930539886  
0.8066804420438161 0.3588137718322172 0.3231335295118975  
0.7759514049683344 0.3746397446500030 0.3215649453058148  
0.3906968244645010 0.3020369463351951 0.3947980047226423  
0.3543612656373581 0.2589334136301381 0.3678471049355633  
0.3239489791188760 0.2583868800433360 0.3493818456616077  
0.3045204407298008 0.2297820917758228 0.3496256412258255  
0.3651820147017260 0.2306134437528779 0.3864564356843627  
0.3455865943056456 0.2021094182329666 0.3863973648510745  
0.3152234887356489 0.2015046734122746 0.3681486315438460  
0.2997601284325091 0.6057934922664021 0.3251989493705704  
0.2458904186847799 0.6240396104560274 0.3504849623685668  
0.2411454470487499 0.6536293587671238 0.3311656331325791  
0.1796789999148094 0.6069504006958855 0.4666465079577273  
0.2033345980744434 0.5556911823482817 0.5103359500408996  
0.1695579500881004 0.5629398078326630 0.5095881437989772  
0.5715691013370041 0.7158583011451689 0.5380267314387536  
0.5992109952443303 0.7656562413977170 0.5126651819668014  
0.5839025361166819 0.7905824682530328 0.5332639973564267  
0.5977943430091203 0.8222397732336695 0.5343110792923800  
0.6282256820694063 0.7728055833772832 0.4931698952267174  
0.6419467294645930 0.8045062767078941 0.4946262536044397  
0.6268753129169110 0.8293741278455316 0.5152450981306618  
0.5550298829898782 0.4494954107298288 0.4972389079750242  
0.5321589442897174 0.3987410624115209 0.5030626191528329  
0.4479219784946684 0.4431953100302738 0.5040036947352076  
0.4227018755634038 0.4928229707671061 0.4958599696968469  
0.3975779242829977 0.4676803638243358 0.4970276874001478  
0.4128543045212003 0.4376120679567540 0.5022304914318017  
0.5748330903069692 0.5084094834972450 0.4970653869529885  
0.5495249029983973 0.5579914335094222 0.5052499175288936  
0.5846037655105606 0.5635895941864787 0.5037865204354498  
0.5999327091782738 0.5335615156019649 0.4984974385074170  
0.4425528795738721 0.5517247880264361 0.4965383120108415  
0.4357600119460066 0.5872183557235425 0.4972182990315233  
0.4653203905399660 0.6024588280696868 0.5030607750224654  
0.5072675635472260 0.4249293032128793 0.5039437864423594  
0.5618046136317569 0.4139957539806001 0.4978342968105359  
0.4902145156873740 0.5762833617325465 0.5042219178226823  
0.5245790207437264 0.5823439954813268 0.5078212520412506  
0.4176136369485950 0.5272983304266960 0.4930459305403158  
0.4728513793209232 0.4188568702510299 0.5067996029839661  
0.5799795950570895 0.4739520937997115 0.4941637077174026  
0.5363199450101296 0.6169123534736388 0.5144559078129161  
0.5319533074368675 0.6423979484213637 0.4888963942878571  
0.5438810937350689 0.6742991702991564 0.4955760723136528  
0.5597841153660830 0.6817378614890218 0.5284619000513585  
0.5637757056728144 0.6565156339633142 0.5543054486259509  
0.5526878167222022 0.6245209408002335 0.5471718572696944  
0.6148885402105926 0.4633376538425634 0.4874757207386471  
0.6329862837318162 0.4448363024477116 0.5129921960334543  
0.6657980145168908 0.4357942899079804 0.5062310900084438  
0.6811166126661911 0.4443758014956521 0.4733362539259135  
0.6629822447471748 0.4624412668644984 0.4475563353002096  
0.6305815848134804 0.4722121762408674 0.4547560941026767  
0.4610902012980616 0.3842020812896366 0.5127392667469290  
0.4444856892361659 0.3760397406129942 0.5451432064796154  
0.4335625000884479 0.3438642695355938 0.5515846224218517  
0.4379117393911230 0.3190787800294052 0.5253000532220444  
0.45398442428214930 0.3271043371830881 0.4926762384917811  
0.4657925086231304 0.3591650827977820 0.4867308390380241  
0.3827335842869282 0.5379745555928177 0.4862691859778290  
0.3670959936340387 0.5293251848604082 0.4534429497662519  
0.3346767004018530 0.5390755916222019 0.4462938265917086  
0.3165057028056686 0.5569024137811887 0.4722362240855976  
0.3317615521707803 0.5653139073591117 0.5052067331480254  
0.3645908421759029 0.5563066207911990 0.5118975868807673  
0.1575063560337003 0.5885424620978812 0.4876933644345114  
0.7155011713841746 0.4335634833157972 0.4633706812470835  
0.7717053034752455 0.4243271053611340 0.4902422566146828  
0.7869979381529596 0.4176567420539933 0.5237684518745038  
0.8201091357138277 0.4079679902002025 0.5250455287564207  
0.8384397677177504 0.4047370084142590 0.4930086539678676

0.8232517145942038 0.4115708977375145 0.4597470818919880  
0.7901132405061803 0.4214031923076019 0.4580212849277784  
0.4263732991458511 0.2847064017733753 0.5340933839128377  
0.3992885761434698 0.2351414853395163 0.5071253106339606  
0.3711514326062940 0.2280404826937295 0.4861098846470521  
0.3577225644422375 0.1961944801263112 0.4862589170740959  
0.4140394556028554 0.2100171664446133 0.5279211697569258  
0.4004468663635355 0.1782112926812456 0.5276472022005658  
0.3722292856025546 0.1711189635266177 0.5070658180102587  
0.2819344566715267 0.5673238001340399 0.4627373573442206  
0.2254679512114184 0.5739916650297712 0.4888049240927280  
0.2135215137115234 0.5998571701905692 0.4669516838482842  
0.1664281072702822 0.5474489083623714 0.6094667517193728  
0.1993151314139724 0.4959168246111667 0.6448127077199090  
0.1647640085759434 0.4965293330346457 0.6438456462913482  
0.5337668340883887 0.7250031918173903 0.6768228866785365  
0.5507693253048368 0.7793823410991187 0.6516840921559317  
0.5309040709656803 0.8005346319780544 0.6726960375516857  
0.5382124219222862 0.8343107373797860 0.6741872609496733  
0.5776143757593466 0.7924004020268309 0.6321194896369985  
0.5847223675560037 0.8261962793824080 0.6339562053254445  
0.5651530084630899 0.8473187259889855 0.6550417917995868  
0.56381424216390832 0.4602733975097749 0.6348365804889189  
0.5503957947953860 0.4062432815983462 0.6406548859177207  
0.4596387971362254 0.4349676678483472 0.6425016302538856  
0.4259834412792251 0.4793745741830961 0.6349335385783494  
0.4057296745861071 0.4501690289507923 0.6359687991234304  
0.4261148327193663 0.4232535668097235 0.6408379847701037  
0.5727651294952527 0.5217730607383443 0.6348988217123513  
0.5390886814762450 0.5659948480858353 0.6435424657252196  
0.5725887651385375 0.5777648533451955 0.6420212463959230  
0.5929971936295487 0.5509765566254994 0.6365251476031684  
0.4349497507656610 0.5408701704067165 0.6359512790041573  
0.4219088583691649 0.5745637946725005 0.6370982461512659  
0.4483365404688510 0.5948123542577444 0.6427028127661195  
0.5212440935947700 0.4275520346723861 0.6417954614172310  
0.5768182232928309 0.4265527178684060 0.6352749745137932  
0.4775065067582707 0.5734920612716258 0.6433019825471579  
0.5102676056371004 0.5855303380673901 0.6465382615633734  
0.4148081648288346 0.5123880782666090 0.6324502959256530  
0.4884974909902565 0.4154155345013645 0.6448905165603438  
0.5839656965491576 0.4888073067243655 0.6317304671047823  
0.5158502630752562 0.6215779308785436 0.6532426334391261  
0.5070567702798514 0.6459295660723281 0.6277424637078768  
0.5135119752138667 0.6793830111014770 0.6343437533215434  
0.5281576978956000 0.6893731053459392 0.6671092464348969  
0.5365179088834926 0.6652077021760785 0.6929121394029757  
0.5309270554280382 0.6318038038873393 0.6858477871661932  
0.6201640844022158 0.4847258718522771 0.6247553686466751  
0.6414424628257852 0.4693365833910347 0.6497969297328260  
0.6753214089139414 0.4665987471030751 0.6428142297124694  
0.6887103628426273 0.4785647890739922 0.6101736903490182  
0.6674737822287461 0.4934664655935456 0.5848268491957759  
0.6338510536881783 0.4969269913689704 0.5922377520061076  
0.4830258848818454 0.3791861828270765 0.6505579977558295  
0.4682649531803045 0.3680295627207653 0.682966263699918  
0.4629453177204352 0.3344142402220142 0.6890681696867700  
0.4712424501310394 0.3109421654359895 0.6624753892061863  
0.4855469189563644 0.3218680701216676 0.6298833500167759  
0.4917355249785174 0.3555282008478677 0.6242408192401249  
0.3785720111936527 0.5166620205706325 0.6257230805252488  
0.3649486303242244 0.5060665541943271 0.5925142616020004  
0.3313130029184719 0.5098004872925210 0.5852857678553138  
0.3100629307205514 0.5233169460730769 0.6115248484678412  
0.3233620284947519 0.5336371965512857 0.6448735123009831  
0.3572688375039266 0.5307009858605114 0.6516706426592253  
0.1481428147226273 0.5222732855149073 0.6261528054094619  
0.7244929125978067 0.4747595253991232 0.6000793149188339  
0.7814346652101171 0.4752933372398564 0.6269193074850646  
0.7976507375287293 0.4683290496148200 0.6598417236563184  
0.8320162538489497 0.4650902885021792 0.6608543607356908  
0.8506900415716075 0.4686340521856888 0.6291016209890126  
0.8345490646259450 0.4756420081329665 0.5964217969489933  
0.8001407444369109 0.4790794764375143 0.5950156646938664  
0.4660586552325914 0.2750219046622810 0.6712540611616015  
0.4493731134224880 0.2210044258342915 0.6450480363861351  
0.4218836277739915 0.2081389329340276 0.6264649546931593

0.4152713496826776 0.1742145475181830 0.6275512195900836  
0.4703281304602638 0.1995880625792103 0.6643822812029531  
0.4635289577534673 0.1656839894465452 0.6651154908905627  
0.4359831235800136 0.1528176552291523 0.6469189036105342  
0.2741302290744024 0.5270041659861123 0.6021985830729525  
0.2175770835171891 0.5211510114642706 0.6278714847897096  
0.2009979334863229 0.5470383653924161 0.6101163305381522  
0.1628340639086931 0.4881808443878554 0.7479145647902745  
0.2037543129940722 0.4599888105780519 0.8002835484295100  
0.1694874194765410 0.4570290638017502 0.8033577564867681  
0.4962800672387169 0.7234810247066314 0.8246920329528242  
0.5116093885535355 0.7798243452328149 0.8021404057249887  
0.5002041406984181 0.7983544781258423 0.8319987685515050  
0.5074974226420986 0.8321388746857254 0.8340023225598039  
0.529901777953276 0.7956731710014011 0.7746198083507013  
0.5369767019973517 0.8293911229740246 0.7771542659270400  
0.5259065601986682 0.8478783420611291 0.8069067551929582  
0.5709110710687578 0.4704542212130424 0.7769204477276600  
0.5673192634964905 0.4148120230248509 0.7820673376452166  
0.4730835842850031 0.4264214335825085 0.7863132452438222  
0.4313604453804020 0.4631352052917484 0.7778448769109644  
0.4171882643067487 0.4305752161721810 0.7798676758718623  
0.44247588195050538 0.4083297897360179 0.7854348511582695  
0.5684719991479363 0.5324463365861896 0.7779096699434592  
0.5268363583701094 0.5690371126114172 0.7874238747327581  
0.5574564390740571 0.5871119992653446 0.7867130037515715  
0.5826915711187816 0.5649464592699704 0.7805299033128930  
0.4289156244297885 0.5251439407220362 0.7782536976270695  
0.4101883136413641 0.5560811772548192 0.7786295450345236  
0.4325431816167273 0.5806687758045456 0.7847754024546144  
0.5349950570699638 0.4307066608270969 0.7847919092795402  
0.5896074073194618 0.4395066910816525 0.7761527490762211  
0.4649152827203149 0.5647645175608456 0.7865181299156391  
0.4948129028648764 0.5825870015070284 0.7904744829007277  
0.4142606397627993 0.4934358192076268 0.7747757006058874  
0.5051338924319305 0.4128366827689500 0.7887674233273149  
0.5855409815531547 0.5022030298100607 0.7740064309031718  
0.4934882088012504 0.6189969905825925 0.7981503209246298  
0.4861071308087572 0.6423664320024246 0.7711219992106074  
0.4872568655756955 0.6763266793892548 0.7785723142368984  
0.4949857300253449 0.6876219180128624 0.8135900933540671  
0.5011734684188357 0.6642292194069935 0.8409871795398458  
0.5009353343381013 0.6304809033862107 0.8332728023056031  
0.6217317483473619 0.5046640673816745 0.7662249339143281  
0.6458629582612464 0.4932410052611492 0.7907366462784611  
0.6795194431452212 0.4957314996310209 0.7825177358503053  
0.6899946860396321 0.5093268240461887 0.7493059351502600  
0.6659833367080642 0.5204555702060969 0.7246294689697657  
0.6324465803631446 0.5185605177592962 0.7331962120437242  
0.5065572998234953 0.3762884954838125 0.7955141153655177  
0.4996729571506963 0.3639915418493956 0.8304372633467471  
0.4995361321051185 0.3300639505525129 0.8371776141463665  
0.5052728928022172 0.3073340878866386 0.8090037637589457  
0.5125123734133029 0.3194596271244603 0.7741912800060098  
0.5135449229811498 0.3535724239914497 0.7677041492771256  
0.3779493777700578 0.4912012166348480 0.7675303671104464  
0.3666361395872944 0.4783736455431360 0.7342079010521568  
0.3329573445405183 0.4771235015439733 0.7261274537712534  
0.3094092886877691 0.4878966803217440 0.7515299127857112  
0.3204945719955756 0.5002580246086231 0.7850876885678094  
0.3542740597780928 0.5020355444147215 0.7928722847719174  
0.1487869717488769 0.4710783730207393 0.7770920804465477  
0.7257066485330086 0.5122698399602622 0.7385755793010731  
0.7809923915739011 0.5258397680358196 0.7672626627116788  
0.7959675886654577 0.5299609208364930 0.8014748251962214  
0.8297513255517376 0.5364898966220762 0.8041661353367703  
0.8491201376917072 0.5389487659961688 0.7727886169599031  
0.8342058137194789 0.5348529755700893 0.7388541772701774  
0.8003372574566602 0.5283792456542409 0.7356884440341408  
0.5039846597142841 0.2712112673935154 0.8190118374138589  
0.4889307943409245 0.2154553894557596 0.7944356954399474  
0.4712952116186395 0.2002701883274917 0.7659630999877887  
0.4646207862254345 0.1664090770826610 0.7670569281563561  
0.5000361137307421 0.1961355108560950 0.8238283127363228  
0.4931740788620948 0.1622161792089929 0.8243614253642463  
0.4754674089101462 0.1471142839083725 0.7962855987687579  
0.2734859255984069 0.4866098674107091 0.7413152855530027

0.2178384515915515 0.4771026273786594 0.7708143040284385  
0.1971418367157713 0.4913510316495076 0.7444670763663959  
0.2962491706095735 0.6408310685943718 0.2045443261185772  
0.6584611004955968 0.6953387424457562 0.2321887095919330  
0.5084646615262797 0.4528984089163393 0.2170352071914422  
0.4509902706319099 0.4964791933465702 0.2170764363268786  
0.5540127626060118 0.5095575180211567 0.2177023337027141  
0.4965609880204659 0.5531396780202086 0.2175756672136468  
0.7028957351185724 0.3551600700965936 0.2111406434795826  
0.3458230367651430 0.3109059777615808 0.2252979615524802  
0.2774984852121842 0.6089067856405435 0.3531648634366717  
0.6274035555065662 0.7140624186982353 0.3731668768611441  
0.5160941604396404 0.4524146912709590 0.3601672649880533  
0.4517169717950400 0.4855959819447993 0.3599860259383542  
0.5510064982499923 0.5159190506426000 0.3608028506382844  
0.4865788188378404 0.5491210234366111 0.3609556230886711  
0.7254361875964025 0.3932804686754936 0.3539078381969121  
0.3737819867178496 0.2881741551731964 0.3662707357235510  
0.2595861291308383 0.5659713447765399 0.4907512328269532  
0.5858040958979119 0.7332737456431440 0.5101189677552445  
0.5217492218127937 0.4555381378713554 0.5007284813679700  
0.4525816002445562 0.4768211877754343 0.5001525224148723  
0.54491576382709614 0.5243777146009880 0.5012287610695959  
0.4757962478245155 0.5456849600692599 0.5005295458749144  
0.7381258679108458 0.4344109892093737 0.4910304511503261  
0.4123768267302623 0.2677029366037920 0.5057427578356873  
0.2526175199467779 0.5200661602708919 0.6300386253521488  
0.5440630643952591 0.7450044233330018 0.6488786652570879  
0.5300145263337204 0.4602672130282299 0.6385597434428545  
0.4582426474654580 0.4689096809858260 0.6389537443268632  
0.5405056182402698 0.5321260785016474 0.6392281438695870  
0.4687614655850714 0.5408382279409587 0.6394908829848076  
0.7465594579052427 0.4788774194408051 0.6279726825749129  
0.4556498080061041 0.2555287108327722 0.6429423330172561  
0.2526750994795104 0.4798042606465522 0.7699646759054600  
0.5057155030621653 0.7455262192808594 0.7980728663081387  
0.5377627544794908 0.4644776648721516 0.7817470172576103  
0.4650401241980914 0.4593329309359658 0.7818291719623589  
0.534823467941780 0.5361994556619836 0.7822039678289983  
0.4621256226782427 0.5310567301855638 0.7826651627028105  
0.7465483897780821 0.5199536983492137 0.7668574964332588  
0.4945283328887377 0.2499001887173288 0.7916962200153316  
0.6899718166986204 0.3593651525821444 0.1501704161716849  
0.3602824429164715 0.3130616456526082 0.2859821257213208  
0.3154448827578906 0.6452160444398003 0.1456409376498820  
0.6425656988664468 0.6922505283302061 0.2924188640306346  
0.7097672112745397 0.3886008189929532 0.2937457838287822  
0.3908332736021621 0.2902528608751585 0.4260593045649891  
0.2945513786600647 0.6159230090359487 0.2937837859216164  
0.6093447893127708 0.7105767812688168 0.4325143839072220  
0.7219853975909939 0.4246242633439066 0.4317249114715382  
0.4293203974522649 0.2732644513584099 0.5653648452706865  
0.2747314468787619 0.5760577020174745 0.4312519672875056  
0.5686483567899582 0.7267626271173885 0.5695230533162250  
0.7326801826958905 0.4683556122745110 0.5681898558010180  
0.4709136813809570 0.2644996236250267 0.7025831355336241  
0.2650843244020904 0.5352473258617689 0.5711525229467789  
0.5293517718653257 0.7348593698764885 0.7084865811002016  
0.7350033094561136 0.5086690860088712 0.7066107702721840  
0.5104207113773985 0.2622708291052526 0.8504124719358317  
0.2638324426832491 0.4909944246774099 0.7096215744504814  
0.4898625902819916 0.7315830637349120 0.8563661193566511

C-CENTERED HEXAMER

```

1.0000000000000000
40.4062059999999974      0.0000000000000000      0.0000000000000000
  0.0000000000000000      40.4090679999999978      0.0000000000000000
  0.0000000000000000      0.0000000000000000      41.8059700000000021
  C      H      N      O
  432    300    48    24
Direct
0.2245560910164219  0.6909821257943695  0.1520573669723204
0.2422596714463161  0.6515981725613192  0.2039691072514266
0.2110765314312004  0.6662477102394206  0.2028386405650975
0.6381506104358576  0.6843057441883292  0.2269185305638640
0.6747223149624333  0.7269395485189507  0.2004700663236336
0.6746256722016871  0.7513372406011568  0.2243404200816292
0.6948344051371015  0.7791208167618753  0.2208698412753247
0.6950543822566028  0.7308645217205707  0.1734481216583092
0.7150765567211687  0.7587220496491902  0.1703255971771725
0.7151180089463869  0.7830427660046090  0.1940919333974083
0.5377126300651794  0.4363295120252786  0.1877440735379836
0.4991177104242256  0.3963933202258057  0.1931063261945287
0.4349443813086414  0.4666689384729026  0.1936874614079070
0.4283403122757876  0.5218351527914422  0.1868035666748830
0.3961708965945681  0.5068195364832712  0.1868944066858701
0.4001599765303790  0.4733833881278023  0.1914099795568163
0.5764118155563970  0.4847838606851138  0.1877109173357688
0.5695855757117860  0.5398409131194977  0.1953810310127172
0.6044122558972003  0.5331689292478267  0.1938827584760087
0.6085515636183649  0.4998056918601081  0.1890052556509111
0.4669296201493124  0.5702413293935182  0.1888165149115849
0.4722732817413406  0.6057957517325815  0.1912172928331971
0.5052070731044906  0.6100344210846886  0.1964207214433815
0.4845134641460417  0.4293948433683298  0.1937163537317186
0.5321307660689817  0.4007086526207992  0.1884810649310086
0.5199692311875995  0.5770785847383677  0.1957808370265377
0.5543584088170983  0.5710406182762782  0.1983612801482613
0.4353251325606574  0.5558996539491671  0.1850021621146091
0.4501100948497394  0.4354028335153429  0.1962080825797195
0.5694760491124243  0.4507267329240802  0.1850649193783391
0.5767805314052805  0.5996777126099144  0.2044566421419112
0.5802899208930756  0.6255214555468239  0.1822389593306587
0.6004996969108481  0.6526430155994016  0.1888323765903195
0.6176080315327257  0.6548512661200290  0.2180094603104586
0.6143327167017423  0.6290190105542508  0.2401704146412783
0.5945625714652450  0.6017134627439494  0.2333216613471631
0.5987106793719412  0.4287508859294936  0.1797589197914795
0.6098967944974318  0.4068113220778476  0.2034258840404393
0.6378594530112849  0.3871907684332992  0.1984219734782688
0.6550764665446814  0.3885671588612506  0.1693331082734863
0.6435643345223093  0.4100173646048119  0.1453886876358828
0.6161068279886384  0.4300707077634599  0.1506352385137254
0.4274415016785071  0.4068038090830698  0.2016351259343309
0.4094917266392026  0.4044904742144501  0.2303919008255336
0.3889948523459862  0.3775442634137199  0.2365456321134565
0.3851633243607867  0.3523422174100548  0.2137975785651250
0.4026170184596105  0.3547390042197928  0.1848183291550383
0.4235339658052082  0.38149955613578916  0.1789032941113017
0.4061738276159290  0.5778154753514013  0.1788691301326825
0.3921606008287605  0.5788254399685976  0.1481116477546323
0.3642892029824720  0.5979955698467871  0.1419603733180184
0.3489464887787087  0.6159873046522510  0.1665493815650740
0.3630109181128240  0.6153562239717408  0.1972058762091665
0.3915355833741559  0.5967890499010132  0.2031342735945523
0.2019535394741680  0.6860242257110714  0.1768556078237140
0.6840133710804158  0.3667539510821858  0.1610572936986102
0.7284376821110959  0.3321887152051688  0.1860822821410613
0.7425747381424302  0.3237295347598452  0.2157414113268450
0.7680654898219885  0.3006101002938035  0.2173883224434289
0.7799112659427342  0.2854497229510216  0.1895895818345243
0.7658754296580972  0.2938864587416340  0.1601831938781560
0.7403475477196367  0.3170717857231419  0.1580416443565069
0.3635018330724746  0.3234162031379598  0.2218793640020678
0.3265879355722565  0.2820749048759840  0.1939135331209781
0.3071222363597647  0.2789608196952537  0.1662061091517094
0.2865392774173037  0.2516522777596966  0.1621106984370059
0.3252177737412847  0.2574185770992711  0.2174972283051961
0.3044838357033883  0.2301767092206347  0.2130420961040035
0.2850684418990861  0.2270588073031933  0.1855729691325013

```

0.3187002850996616 0.6355335477494640 0.1574468140807153  
0.2648939169316324 0.6564566361166944 0.1788357778746483  
0.2558909649160553 0.6764397707856847 0.1526982574642718  
0.2110127406417029 0.6700999126346889 0.2927470638549360  
0.2194422033129498 0.6118116992623164 0.3275614702672417  
0.1885775909781893 0.6272347486009365 0.3265741678157162  
0.6069486391589249 0.7014736468742955 0.3499042450003240  
0.6420891184518774 0.7462219529527694 0.3276540433607401  
0.6294357280377806 0.7738470849216981 0.3438228185281194  
0.6477008088899817 0.8031322108775528 0.3446299040875138  
0.6729696062602594 0.7482272550114714 0.3124495309920222  
0.6910522959628463 0.7776136091632673 0.3135000313023078  
0.6785246537257520 0.8052011655659781 0.3296072435841533  
0.5479492286347556 0.4415745827940133 0.3124686490866857  
0.5168676112819002 0.3954200372935712 0.3168403514402037  
0.4414519673574876 0.4532740959577753 0.3192704602711129  
0.4247289807101929 0.5063999164496724 0.3132871791079305  
0.3958370152543867 0.4858123115313035 0.3143647266757759  
0.4059731084265751 0.4536075697449434 0.318200882155938  
0.5773904540831846 0.4961606505858636 0.3130057096750193  
0.5606556221849659 0.5491267623723052 0.3202498519302205  
0.5961323370737067 0.5488042673530050 0.3193036014428559  
0.6062879011035190 0.5167035076983537 0.31472904572805324  
0.4540966414276259 0.5610043131306978 0.3142394784444265  
0.4533861969816286 0.5970564485081105 0.3153050735971394  
0.4851561542482934 0.6070115261216604 0.3198588219434699  
0.4968124825372048 0.4253709519141195 0.3182000741955366  
0.5486104806853827 0.4054980981381314 0.3123651669205836  
0.5052564955954850 0.5770400168457118 0.3201341431430510  
0.5401280328744716 0.5771805225913069 0.3228112355879961  
0.4253937062512949 0.5412042261004100 0.3114962599700089  
0.4619593087056323 0.4251485128599902 0.3210898667183899  
0.5766850603410858 0.4614089115444575 0.3102643801250052  
0.5573451900014098 0.6092685344228427 0.3287609515313712  
0.5573114766149431 0.6349930825957042 0.3061752199112908  
0.5738601448932293 0.6646505197521999 0.3122310216018463  
0.5902164373773313 0.6695948712130795 0.3414339994337867  
0.5899999205145535 0.6441483022041378 0.3642275459166422  
0.5742466165199351 0.6142691088242160 0.3577781040874122  
0.6093358418100394 0.4450340313555063 0.3050844341747086  
0.6231307783088479 0.4234143874617660 0.3277554977372449  
0.6539959713645261 0.4088632088597512 0.3226445365577036  
0.6715465728253400 0.4149689010510021 0.2943138923003551  
0.6576705058166125 0.4361818667079036 0.2714044523369182  
0.6273038636461578 0.4513627620251761 0.2769167602305204  
0.4446038002270908 0.3930041586503656 0.3263196820245807  
0.4273378975542984 0.3876234137683118 0.3550753996707485  
0.4110039116830637 0.3578936447239687 0.3607472387505463  
0.4105644754664439 0.3329788966378672 0.3374207911629799  
0.4273894316120341 0.3382474437514715 0.3085249573890627  
0.4445203817728909 0.3677398137305038 0.3032536560199244  
0.3927519928032480 0.5576814034625251 0.3065838930844060  
0.3751903662076821 0.5523588649824254 0.2779774568881993  
0.3450117533994216 0.5679091246150767 0.2725026183168522  
0.3309504174578891 0.5884584979725415 0.2958641087825191  
0.3479653435466357 0.5933862353691775 0.3246948918643552  
0.3786734401194676 0.5784760102007274 0.3297915343645381  
0.1841642865266436 0.6563980428010988 0.3091387619017180  
0.7036695162713577 0.3983412246646646 0.2862464514710037  
0.7558913378507083 0.3774310265725731 0.3109094243276656  
0.7677997094808756 0.3648533140363429 0.3400495223502770  
0.7982330007427515 0.3486992220347457 0.3412963488998616  
0.8171829481737698 0.3447979334446358 0.3135812319192193  
0.8054182874088363 0.3575341929070888 0.2846829637949960  
0.7750332046936704 0.3738902030052411 0.2830828115630091  
0.3929061598334554 0.3013555576372939 0.3450184683839132  
0.3560588188754616 0.2586857070529790 0.3213355844885566  
0.3255561809772606 0.2583073803015794 0.30531222446469242  
0.3062344627556159 0.2297062227441412 0.3052622123847706  
0.3670545328850932 0.2302029021153076 0.3372581966678447  
0.3475464229042722 0.2017092438439167 0.3369505628948655  
0.3171140375055875 0.2012602480067893 0.3210777282589863  
0.2992764023559588 0.6058795306107966 0.2879014555681048  
0.2462492556654951 0.6254820625168036 0.3108331169035732  
0.2419756453100291 0.6548443604698327 0.2934222836831606  
0.1807556209057582 0.6086625270895263 0.4141696498234655  
0.2031098855657891 0.5542405592941447 0.4490192431077983

0.1694887876691632 0.5619860366481555 0.4484518749971533  
0.5712068092524766 0.7156869913252528 0.4716325068669888  
0.5972095965157013 0.7660486490658401 0.4487758946725638  
0.5818912242346864 0.7905733428488608 0.4673234594626434  
0.5949958432268111 0.8225109896769373 0.4678080401737582  
0.6254574004434666 0.7738576507823277 0.4307814546066823  
0.6384155490824009 0.8058260292476424 0.4316307877615667  
0.6233117402214522 0.8303120202883617 0.4501660914218258  
0.5552572441774557 0.4496893795570605 0.4362626403281729  
0.5325717991982930 0.3989604093697098 0.4413717973086367  
0.4482787611123903 0.4430575627781048 0.4423154078265074  
0.4229044466800419 0.4925843126848773 0.4357049407970752  
0.3978986607578424 0.4673983903282501 0.4365962743230524  
0.4132700443489979 0.4373878878109091 0.4408105138379101  
0.5748839921991072 0.5085467626525955 0.4359509886980867  
0.5494906707950956 0.5580224477793237 0.4428453427219958  
0.5845062390123954 0.5636811931599867 0.4415551335271670  
0.5998907568981239 0.5337073501393046 0.4371546137193560  
0.4425795911058668 0.5514573645716326 0.4363578601322827  
0.4356969277062182 0.5868710962748094 0.4370749659263849  
0.4652475994566713 0.6021781241613428 0.4417619259825085  
0.5076182111139632 0.4250194085035038 0.4420418164879352  
0.5621404523711071 0.4142812760366161 0.4368709876374833  
0.4901986232261777 0.5761266356227667 0.4424423591408714  
0.5245338759615193 0.5822716294081559 0.4452246338430957  
0.4177082655803918 0.5270004154413470 0.4335463502523934  
0.4732694035799728 0.4188374806907068 0.4445883699114727  
0.5801277472757055 0.4741508841708240 0.4336270003727702  
0.5362134095751085 0.6168052776819732 0.4509967018550407  
0.5314939035315456 0.6422882761709238 0.4286113222027397  
0.5433152174604489 0.6741742900556601 0.4344570941775128  
0.5595116656751810 0.6815917909536116 0.4632546257482392  
0.5638754672142345 0.6563591594310256 0.4858841392406788  
0.5528499348524355 0.6243958735984958 0.4796467010134978  
0.6150705082685735 0.4635906537307549 0.4281619851482237  
0.6328864427224700 0.4452359141641624 0.4508995832250828  
0.6657201574818831 0.4361823657188442 0.4453556709075168  
0.6813548268179587 0.4445948787379724 0.4165286995373462  
0.6635241304743678 0.4625553230438609 0.3935818413402064  
0.6310996634619598 0.4723428054501297 0.3995148004862629  
0.4617095475869860 0.3841734685313932 0.4496970887538637  
0.4449719875939429 0.3758035036197845 0.4780797635698231  
0.4343057762902608 0.3435702105969879 0.4835934294077425  
0.4391145707068430 0.3189010934748763 0.4604656559616918  
0.4553654799346225 0.3271280838827208 0.4319140754388726  
0.4668440373007731 0.3592583736203435 0.4268113119552868  
0.3827691991536920 0.5375861989830852 0.4280841781896551  
0.3667826978068090 0.5290186807027302 0.3993608180872548  
0.3343195334658147 0.5387406857904390 0.3934931655472605  
0.3164546780871693 0.5564260436020537 0.4166079179060544  
0.3320217868404779 0.5646620334649936 0.4455105650832306  
0.3649002557585141 0.5557026776929574 0.4509599050929093  
0.1581038875462683 0.5891795514430106 0.4309964293335852  
0.7157230371648438 0.4336562649882993 0.4080708940237368  
0.7716059023010967 0.4240288650985969 0.4320155220595657  
0.7865270017228823 0.4167175055430210 0.4615469961126014  
0.8194781049846204 0.4066840330596779 0.4628080246096413  
0.8380201791516948 0.4037570760030850 0.4347242598193200  
0.8232138060361914 0.4112418530260837 0.4054253465666288  
0.7902391051536545 0.4214139561903177 0.4037792948658593  
0.4279563290014707 0.2844377088309436 0.4680289636451199  
0.4031872267740096 0.2341018545430791 0.4436971305866539  
0.3756396728658212 0.2260971503697984 0.4247841028394421  
0.3633584792762310 0.1938528702494192 0.4246434915412063  
0.4185116854909149 0.2094985263904750 0.4621428966767934  
0.4060818170917079 0.1772931335381267 0.4616302276483155  
0.378453556965772 0.1692812224088025 0.4430874768641327  
0.2818821776041761 0.5669834075597646 0.4086489928655138  
0.2257233339917978 0.5736669104667821 0.4318220392429132  
0.2144353667895012 0.6010723769771439 0.4143712312527789  
0.1673750738857656 0.5506194055092997 0.5359313774168109  
0.1986285728791107 0.5011733969613070 0.5713208428599642  
0.1641867184657473 0.5032805273323375 0.5709429820844100  
0.5332634306647999 0.7243353132631900 0.5933343008092264  
0.5515587316828976 0.7778780343782958 0.5704993460876918  
0.5314328793667580 0.7998745389822927 0.5876588007868185  
0.5393361167556751 0.8334752062523295 0.5883202933462280

0.5793306592139245 0.7898262124068410 0.5540199537328467  
0.5870664960146377 0.8234414117906078 0.5550200489906809  
0.5671761048743673 0.8454307347775621 0.5722109346980940  
0.5641672625238163 0.4601259801237992 0.5578410868409014  
0.5509900543210865 0.4061182874454710 0.5627440405850824  
0.4601680048164173 0.4343600810218988 0.5639459192691113  
0.4262254002707261 0.4784620459700051 0.5573810204156409  
0.4061946007410966 0.4491758624213635 0.5584347668156294  
0.4267595116239905 0.4224550142988724 0.5626254945431871  
0.5728244559587835 0.5215402492686918 0.5579487683811424  
0.5388888647876108 0.5655056509801358 0.5652170301368525  
0.5722931831016931 0.5774447132524326 0.5640795692825057  
0.5928560364244919 0.5508054223154371 0.5594356251476665  
0.4349261794717157 0.5398711633039199 0.5583177769952953  
0.4217972220319480 0.5734648926902947 0.5592728873740319  
0.4481185398434138 0.5937804339433368 0.5641466397875550  
0.5217629974337689 0.4272507830746504 0.5635960229950131  
0.5773147617391435 0.4265354970382694 0.5582639676312051  
0.4773238086930306 0.5726187902572232 0.5647137660129319  
0.5099642714680290 0.5848224461490338 0.5676595867017544  
0.4148579594939387 0.5113673420591925 0.5553173632551158  
0.4890893363228815 0.4150004660877962 0.5661587644710928  
0.58419588839579007 0.4886922334784401 0.5552934643826377  
0.5152925828509721 0.6208849750067176 0.5734258132665772  
0.5066242725062562 0.6450118513996393 0.5507484899032167  
0.5129374283149098 0.6784671010593665 0.5563779482264969  
0.5273299992829402 0.6887058082499892 0.5852542169927836  
0.5354629349895843 0.6647754488782456 0.6082237761797938  
0.5300117943228401 0.6313670564383747 0.6021905302306915  
0.6204169961809486 0.4848011798768971 0.5494232363693290  
0.6416660847755444 0.4698477638718739 0.5717264029398582  
0.6755579218631070 0.4673134234397723 0.5657653181606452  
0.6889580854762470 0.4789967067660389 0.5369502385869458  
0.6677546018549502 0.4934869403118449 0.5143945299335504  
0.6341381256198215 0.4967937935112470 0.5207498247628208  
0.4837558879956579 0.3788250595279620 0.5712803223475221  
0.4689032639227444 0.3677653993848313 0.5997814496994153  
0.4635965276729163 0.3342266377227679 0.6052559327855181  
0.4720094720476904 0.3107251458501770 0.5819643610844841  
0.4864653372522684 0.3215448730441330 0.5533135743046831  
0.4926306513280481 0.3551271380862992 0.5482557643485061  
0.3785821508806775 0.5155174613171903 0.5498507774754960  
0.3643534033954421 0.5041602844981565 0.5211580623710714  
0.3306897093084393 0.5079946531107534 0.5152458650261150  
0.3099518059563959 0.5223463674255048 0.5382811969172702  
0.3238217833564717 0.5332956857452975 0.5671528185384089  
0.3577593209014713 0.5302808979733628 0.5726491591901635  
0.1483566382076474 0.5279541725152860 0.5532209863632086  
0.7247042420836330 0.4752010223764234 0.5280881441933297  
0.7816644148297676 0.4763958075797561 0.5514678240755345  
0.7981293359337762 0.4713805467565715 0.5806744841709991  
0.8324642213758281 0.4683740880637238 0.5814464899611527  
0.8508695871948518 0.4702821400541365 0.5531977124143364  
0.8344691366529080 0.4754812575513782 0.524229377909713  
0.8000856149516691 0.4786184781744224 0.5230665872176902  
0.4664676004641826 0.2749111532966668 0.5895702422532690  
0.4487187676568985 0.2214569556691092 0.5660246961892497  
0.4213567479930007 0.2094027004069250 0.5489764148894988  
0.4140493789466979 0.1756783160590355 0.5493720105628385  
0.4688462800310983 0.1994491196242545 0.5831777285951157  
0.4613666059154612 0.1657438501660752 0.5832318796679605  
0.4339553785174048 0.1536726676725001 0.5665262382876022  
0.2740667606430440 0.5267131996622660 0.5302985929795901  
0.2176238408977829 0.5237771165008186 0.5536467764777820  
0.2018506499628906 0.5486760485280094 0.5359341910226870  
0.1638273870428114 0.4863020414773143 0.6582719465674668  
0.2051459193691082 0.4420686662973168 0.6902601467248946  
0.1710346225634885 0.4368064142662805 0.6898106491319277  
0.4920723352030976 0.7259798617370502 0.7144292754810648  
0.4995342595862310 0.7822264891961657 0.6918167919223149  
0.4762259590095922 0.7997557125691090 0.7100225630688481  
0.4774046328073910 0.8342566952804898 0.7108219867183769  
0.5236467755666052 0.7995290996596582 0.6743895778966184  
0.5246394952182764 0.8340043099351492 0.6755343316863632  
0.5016170321546225 0.8515596339056589 0.6937994482404337  
0.5704225172451800 0.4711920686745489 0.6795939856197948  
0.5667843948795653 0.4156810682554600 0.6841321530543421



0.4724594769533335 0.4276885166096540 0.6859030487594278  
0.4312501616620207 0.4651173946592850 0.6796007651241730  
0.4167182257252290 0.4327443649265032 0.6803109720397920  
0.4416925281940540 0.4100573674492925 0.6843553845836623  
0.5683016102738332 0.5331521168353566 0.6798952350498646  
0.5271003705503692 0.5704282889243362 0.6871115562974195  
0.5578568577338843 0.5880891426403076 0.6858054308626527  
0.5828226289318579 0.5655073930518613 0.6812401887155113  
0.4290780615465933 0.5270556032905372 0.6808332392767369  
0.4103030050129181 0.5578277477569524 0.6821165935679451  
0.4327296734047827 0.5823995009365260 0.6868890173393764  
0.5343592820173813 0.4314574116366081 0.6853095964532645  
0.5891485289808069 0.4403578194930309 0.6796483167953991  
0.4651915084262145 0.5666469833495286 0.6870585936919562  
0.495236924036756 0.5843808322047931 0.6896137617189901  
0.4143033439695955 0.4955174554474472 0.6776550323296644  
0.5043352586612897 0.4136914187869352 0.6878755970516408  
0.5852285016347295 0.5027943397725788 0.6771520303854303  
0.4941321944605824 0.6208777962523676 0.6950102142755146  
0.4807603616946977 0.6427634430015059 0.6723439573636710  
0.4807765613374736 0.6768673521153949 0.6776882229051485  
0.4934107649986425 0.6898694019175861 0.7062834611817213  
0.5063624581500616 0.6680899995267504 0.7291969061464671  
0.5071917918900412 0.6341989875318786 0.7234304302354547  
0.6215911680427650 0.5051835857024766 0.6712994163988242  
0.6450118323532745 0.4936580588272295 0.6934864379016970  
0.6788575747291278 0.4967845869413569 0.6875897516516827  
0.6902159769282672 0.5109223831141048 0.6589735872645713  
0.6669285668745413 0.5220194057681350 0.6365367727096732  
0.6332037634635480 0.5196338961154153 0.6428110060512451  
0.5054742231773176 0.3771067408647595 0.6926413102505881  
0.4928558479064693 0.3633263395070825 0.7210462166718995  
0.4938503248831354 0.3293573444668920 0.7263094307149682  
0.5065261449608172 0.3079760527245503 0.7029078155340677  
0.5186285737574228 0.3214280485536017 0.6742956694802196  
0.5184744860755205 0.3556039471648996 0.6694417379530669  
0.3779202595407614 0.4932200655755994 0.6718529132286406  
0.3663093921993031 0.4801419627094475 0.6427517521603995  
0.3325731629520904 0.4777207263859754 0.6365263569515458  
0.3093570519296355 0.4873797322817519 0.6596300074458623  
0.3206970484764746 0.5001246426944531 0.6888567384258063  
0.3545475863572901 0.5033588132741469 0.6946957843760295  
0.1501952645952159 0.4588792980883220 0.6738003700401950  
0.7261425088593453 0.5132730305913538 0.6502899927394415  
0.7819944222396481 0.5229653937535484 0.6743311127574012  
0.7990279797307145 0.5185411113855356 0.7033264980113192  
0.8333760707788990 0.5213338686903878 0.7043971678946873  
0.8512479452238806 0.5284580228992993 0.6766089169671621  
0.8342732468196153 0.5329275388868082 0.6478342419079708  
0.7998529483350545 0.5303207896520908 0.6464190657039200  
0.5082586853059462 0.2717940642907242 0.7105905580448665  
0.5020113234535974 0.2157679123719121 0.6872696469496837  
0.4781220441000566 0.1980345551166749 0.6699776969698501  
0.4781356928708228 0.1635295049363873 0.6706842448876157  
0.5260777363134296 0.1986783052985540 0.7049370493219913  
0.5258966025820049 0.1641594627737145 0.7053179312532992  
0.5019389748833024 0.1464033464974294 0.6883891233629591  
0.2733533341689417 0.4845618912331083 0.6515322320971370  
0.2187394601675715 0.4695867030975054 0.6745743622065686  
0.1979164255024009 0.4917777480610358 0.6584767277163112  
0.1706459734293429 0.4314958200215848 0.7824724380514501  
0.2159286839926274 0.4113122237778604 0.8285980697823704  
0.1825126776048227 0.4037954163984991 0.8322454806768957  
0.4542236929516473 0.7190513641811520 0.8441427259070697  
0.4590580540386162 0.7770802191052922 0.8240444400838565  
0.4439218482237107 0.7932472878946002 0.8499947714611025  
0.4444451794518154 0.8277606575593579 0.8514443601048809  
0.4742442537813701 0.7959412594341623 0.7998652668918512  
0.4745720311582132 0.8303491330391352 0.8017914063066084  
0.4597313714816051 0.8465410573886089 0.8276246381073592  
0.5755769387746976 0.4842376656287694 0.8042053064112504  
0.5822413193231650 0.4289597100820056 0.8086142390996295  
0.4875938701857354 0.4230904900708624 0.8121483717782013  
0.4398966719501040 0.4515737138351245 0.8051131135102538  
0.4318904926900665 0.4170600387679297 0.8072002133434795  
0.4607988314297063 0.3998038294481343 0.8118167252895676  
0.5617940436273273 0.5446503786516599 0.8049402528823726

0.5141932459907461 0.5730617244726995 0.8128259699919488  
0.5409855965701681 0.5963544977894605 0.8123357397997300  
0.5698320015710676 0.5791498480711559 0.8071907038554906  
0.4261175619540296 0.5119986856410365 0.8051842083148184  
0.4020583544692648 0.5389305599285704 0.8052594977497919  
0.4195013174769903 0.5672273305160271 0.8102809633735198  
0.5475821773751111 0.4386227702800382 0.8107966532939674  
0.5996292334929023 0.4573099575389541 0.8036681371173309  
0.4541904463317571 0.5575605664250599 0.8118913103032793  
0.4802715867530262 0.5805415422373774 0.8152747724499542  
0.4175275801742702 0.4781652504032451 0.8025065191639309  
0.5215381514490732 0.4156113451771479 0.8142038338329098  
0.5841153697645985 0.5180835268168655 0.8017417434308544  
0.4721642906417255 0.6160642349331688 0.8216963279914463  
0.4611109832837157 0.6374385799470348 0.7975333256388141  
0.4555870651988906 0.6709621333870285 0.8037914568208147  
0.4601536490149002 0.6836302340469779 0.8346980024583395  
0.4700693107791146 0.6620130285155588 0.8591611674798052  
0.4764960184070723 0.6288700101377194 0.8526664592948301  
0.6192743188675224 0.5270713075981512 0.7951546732639183  
0.6448014547768588 0.5207051596764644 0.8171231178143629  
0.6774917768610669 0.5290709201095517 0.8100448523240080  
0.6856317498387171 0.5436078756856837 0.7805590808342501  
0.6602654368965772 0.5497635809808383 0.7584724126981063  
0.6275854521045193 0.5420420292257063 0.7658662017660102  
0.5296590421865268 0.3800063340188854 0.8201832279451396  
0.5261023796962782 0.3669763716565188 0.8511551208418758  
0.5321908944277863 0.3336686188382491 0.8571597547019145  
0.5410316500259411 0.3121508109452452 0.8322370714989271  
0.5449755471898055 0.3250797183785624 0.8013480668758430  
0.5397414595063932 0.3587314991415433 0.7955430057989137  
0.3822009531199396 0.4693663570999053 0.7966151883159375  
0.3730127445509265 0.4543977390745599 0.7675573318895281  
0.3400381605766555 0.4472795842856792 0.7608066226877643  
0.3152358061600418 0.4541022597111768 0.7833072804588459  
0.3242893781223270 0.4684913273677520 0.8126240571777370  
0.3572679664441215 0.4761640161069952 0.8190911857132241  
0.1596246463896878 0.4138283295400907 0.8091328235493426  
0.7203431804450677 0.5523745729232662 0.7711742741514382  
0.7721543345535141 0.5760382605547332 0.7962220082738373  
0.7855435128577521 0.5843595418724241 0.8262113638296565  
0.8177843404567521 0.5962395421599845 0.8286095424602088  
0.8371867113102777 0.5999638143227342 0.8011582173800417  
0.8238159914562931 0.5917472462049145 0.7714070944089555  
0.7914945812817344 0.5798810141135825 0.7685855661264157  
0.5464198402741333 0.2765071795403471 0.8411857806389198  
0.5408233135050396 0.2188791118030995 0.8201331328511768  
0.5258875060375722 0.2006745568925760 0.7953510746929806  
0.5252839692856683 0.1662360006544888 0.7965432632385796  
0.5554062632911621 0.2020324568137546 0.8459824662847665  
0.5546315592686420 0.1674971921339251 0.8466800788136315  
0.5396157579835870 0.1493612799618692 0.8222398734193350  
0.2799764808365874 0.4468470539513574 0.7746921704862213  
0.2269605896206462 0.4290494022870771 0.8017048228856772  
0.2040619772960044 0.4392190308635043 0.7784745046341061  
0.4532684934446296 0.6247398318299275 0.1896057967936562  
0.4022536728940567 0.5965544867579254 0.2271014371612022  
0.4859464342703421 0.3730984548695349 0.1955329043272361  
0.3731069961478730 0.5202506706953344 0.1839526336706443  
0.3808725931012893 0.4547357123781755 0.1925796874570989  
0.5182220567145759 0.6332362776842549 0.2001140008401003  
0.6236555939165010 0.5517839592815135 0.1959143706041565  
0.6317179497565097 0.4864438091407498 0.1866045847541829  
0.5667925151991478 0.6243643753153154 0.1596500529481575  
0.6018972372722716 0.6727588061976890 0.1713964432567599  
0.4759858452457258 0.4995605721368442 0.1914286052139826  
0.6272719912933840 0.6308179539814538 0.2630096671200311  
0.5921458971451566 0.5818307126109820 0.2508614083115763  
0.5967401134067795 0.4053925366864491 0.2261884150324434  
0.6458269766852882 0.3704505115967027 0.2174310705242337  
0.5286449883016687 0.5069687712548537 0.1915323415462186  
0.6565368598898835 0.4102883313256933 0.1224952195425173  
0.6075925110790242 0.4468057743476014 0.1318407758854940  
0.4122574942353806 0.4239200755385146 0.2483523981478163  
0.3758225384790884 0.3755621570459372 0.2592500884586184  
0.3536973432730116 0.5993924780651159 0.1179889701130398  
0.4008897563281159 0.3350486185490291 0.1669626893783624

0.4371922332170338 0.3828191861371711 0.1564132303508577  
0.4034608078323978 0.5644169258218908 0.1288931427273222  
0.1774698586204506 0.6974112384949539 0.1759689181622847  
0.2689620532259837 0.2056343599579002 0.1824071939932149  
0.6978347462865448 0.3657517568030644 0.2083983965954504  
0.7334699000374952 0.3356414059431505 0.2374782870302106  
0.7786732434992981 0.2944588841696648 0.2406662002369986  
0.7998646885105452 0.2672845166753137 0.1908703560581038  
0.7749003029475500 0.2822979931374301 0.1382497837000987  
0.7295514784207442 0.3236786120993935 0.1351039684658836  
0.3494144344681841 0.3232476112103057 0.1753744424199491  
0.3081157771070280 0.2981993502605357 0.1478221302090300  
0.2715550833376515 0.2496402085650011 0.1404711699459497  
0.3402086317416995 0.2596594532239693 0.2389763640919620  
0.3037521376937147 0.2110603407951893 0.2314886658379483  
0.3002214715817164 0.6295003729161657 0.2029746570409678  
0.2732693537640669 0.6800427116486796 0.1331702997091287  
0.2178282464278580 0.7064317055759277 0.1316269768947970  
0.2493758439246520 0.6362872761478245 0.2243938551978155  
0.1937960422816118 0.6619979020412917 0.2224923105226898  
0.6536364416615155 0.6853439586539986 0.1808370470456851  
0.6589391770768391 0.7484772831224478 0.2452810499789877  
0.6944755305796819 0.7980076655437538 0.2395491575444579  
0.6951369829982067 0.7118644500160497 0.1548104502115057  
0.7307463364796536 0.7613738393047816 0.1492136766457420  
0.7308031194290319 0.8048866532855267 0.1916997784346982  
0.5509742089270527 0.3817049986476651 0.1860979650647544  
0.3519928762473981 0.6294422297619515 0.2168139331114164  
0.4315543946120856 0.6125660702526310 0.3131553947443353  
0.3918146018086791 0.5827171289453823 0.3522285744515176  
0.5078674889597042 0.3701687506995160 0.3186650253088834  
0.3705985107759056 0.4948066867361217 0.3125891967844418  
0.3904135640484128 0.4318009314091075 0.3200114175004367  
0.4941489989512965 0.6322001785989484 0.3223976766973596  
0.6116869570298944 0.5705526526798010 0.3217400682820472  
0.6315346635962227 0.5077556245236617 0.3128664628020119  
0.5444262585309795 0.6315400270642892 0.2834734952466335  
0.5736265054149082 0.6841968972410924 0.2941891147263769  
0.4757062343270033 0.4932330956395458 0.3163028177987260  
0.6022666730019542 0.6482058161365926 0.3871470242983675  
0.5744396056835547 0.5945430044688749 0.3756342385876575  
0.6096846855458052 0.4183202937607035 0.3498521663726537  
0.6641561078806497 0.3923366746152115 0.3408296390462289  
0.5264104045537159 0.5092606203543449 0.3162180695714026  
0.6710007455339840 0.4403400786955373 0.2490660117431002  
0.6168867994309618 0.4679805038314303 0.2589416474125125  
0.4272176041510130 0.4069752284745021 0.3733121088347749  
0.3983722502633358 0.3535688428372866 0.3834344294978422  
0.332025955534141 0.5645871353863691 0.2498470275894198  
0.4274765370118546 0.3191053876197100 0.2900809997575457  
0.4576574645680385 0.3714788898165092 0.2807327426091122  
0.3858176948232417 0.5362951067531437 0.2596453269266346  
0.1599742003903213 0.6684017000330904 0.3083557110397163  
0.3019962758405500 0.1788725888217760 0.3210257743414264  
0.7180734817482067 0.4031705106948428 0.3331711746245787  
0.7531189032759109 0.3681283241954222 0.3617393128495305  
0.8071306665077558 0.3391531335225473 0.3641642394006142  
0.8409611946142104 0.3320140191651780 0.3145326412944723  
0.8200207046277724 0.3548412570758067 0.2628597816763154  
0.7660322426461263 0.3837676845581555 0.2605188425581654  
0.3726736940898240 0.3019198684799725 0.2998220205717551  
0.3171802329832200 0.2805549180940603 0.2929061818123536  
0.2824493784136910 0.2298099731295221 0.2928687890430605  
0.3907260658628907 0.2304029601818807 0.3496936889650381  
0.3564428253592146 0.1795728263838262 0.3492107665697864  
0.2815944349394927 0.5961819007109491 0.3332516105469621  
0.2627749685323401 0.6655740647697223 0.2805261750138364  
0.2079679179829787 0.6930029812133667 0.2792041185271172  
0.2230536975609980 0.5892004749522389 0.3414190587949473  
0.1678571346127430 0.6161901006810775 0.3394910515108920  
0.6272484543965328 0.7030774981011992 0.3047010564299219  
0.6054640975665682 0.7723451460429510 0.3556268626136590  
0.6375694534694049 0.8245643686973771 0.3571508128034355  
0.6826139959319798 0.7266428622901623 0.2998131600332120  
0.7151526784695311 0.7788121619873284 0.3017430219156527  
0.6926825821723652 0.8281927472884080 0.3304308074760262  
0.5703969410883952 0.3900378741052279 0.3095598241499437

0.3374893082879687 0.6093592934112314 0.3431715973732025  
0.4115420685094374 0.5983972210274894 0.4347011112529581  
0.3767894530041146 0.5624028293064161 0.4734877090071495  
0.5280636201946314 0.3725756421528025 0.4436638734275796  
0.3715299313969013 0.4719614537534627 0.4344398049029224  
0.4016000189279946 0.4132704158832750 0.4425645038103487  
0.4697529079249127 0.6285516421973764 0.4441848426975554  
0.5961902682241960 0.5877674961553655 0.4435954865346740  
0.6262694231286481 0.5291490492945621 0.4350750602069037  
0.5188492179991935 0.6369076125850593 0.4061371901703821  
0.5395732088107037 0.6934486955323683 0.4165071422493060  
0.4753554693039459 0.4881601985861330 0.4393388229558115  
0.5759556800254060 0.6622532535110804 0.5085226463189655  
0.5566456153754505 0.6049186618420394 0.4973839933848849  
0.6209837958258034 0.4383668208858493 0.4733718291285812  
0.6789958619030170 0.4220854092045499 0.4635800468027386  
0.5224137022665696 0.5129543800356836 0.4393998468608999  
0.6754615458896021 0.4685390171824737 0.3708985169757919  
0.6175892535655024 0.4865349967770554 0.3815204267289831  
0.4408747772742194 0.3948427955606378 0.4961919899093354  
0.4221841742025828 0.3370236746806368 0.5060455710108127  
0.3223797665465372 0.5328426155854048 0.3707872059251805  
0.4594851772008975 0.3082881569084592 0.4136125578075624  
0.4796152862143930 0.3652814178667022 0.4045632471910706  
0.3803474580542485 0.5150048284662180 0.3812768361101787  
0.1317726569591117 0.5952061387151431 0.4305781593201241  
0.3688139237814810 0.1440453479203162 0.4429572729937354  
0.7302450823405610 0.4436581943548875 0.4541044822041972  
0.7721533783009085 0.4193563238259819 0.4835034905366405  
0.8306666245883647 0.4012024871788007 0.4859791395223425  
0.8638161446265948 0.3957941081783299 0.4356985234121620  
0.8374078414584433 0.4092009265936423 0.3832877076471360  
0.7788837016528348 0.4271829495560318 0.3808876122387858  
0.4102795985858196 0.2797511417535418 0.4220519710323408  
0.3641649800442363 0.2452407420391247 0.4100699717887372  
0.3417508887826960 0.1880315487065763 0.4100146250940525  
0.4399489798817114 0.2155732481354226 0.4767633541694952  
0.4182836215196701 0.1583036385633650 0.4759776900693062  
0.2670375778344407 0.5534329112580832 0.4539465104346271  
0.2319215731276079 0.6162948206519769 0.4011192504161659  
0.1722588368868862 0.6301886500482951 0.4006930260228159  
0.2121230573226993 0.5332538795235411 0.4629628138909790  
0.1521494440693325 0.5465295119047192 0.4617834048810502  
0.5894188530803789 0.7211365381629425 0.4258919768105897  
0.5599126986109932 0.7846411164787978 0.4812365087966030  
0.5827823823353240 0.8414527660305792 0.4822059156527223  
0.6369295777081329 0.7547952585296436 0.4159759561749597  
0.6605171415833209 0.8115076695903816 0.4176522208566081  
0.6334776803783935 0.8553350536470834 0.4508017123123162  
0.5863022972828660 0.4027648089783012 0.4345342278128193  
0.3185738437912339 0.5784519989578777 0.4638344660096992  
0.3959735396435060 0.5804931480855536 0.5569026614080681  
0.3682383473897063 0.5390730182732634 0.5951562676994572  
0.5512613115608227 0.3793364123245903 0.5648928692050659  
0.3794240701401417 0.4488925637848562 0.5564005967281547  
0.4196513085998735 0.3966348722922555 0.5645108755422484  
0.4478529060496058 0.6205174068673421 0.5667584026266336  
0.5793997029508595 0.6032314510430813 0.5663495778613986  
0.6196217013011526 0.5511258814876292 0.5573639768066649  
0.4953354661057663 0.6373870253287124 0.5282068550903743  
0.5063213871189144 0.6967017492692843 0.5381888091488851  
0.4785987057766005 0.4836393657098157 0.5608338528075532  
0.5460775418447940 0.6728178691113051 0.6309297546553714  
0.5367972950913106 0.6129352993361675 0.6201332271055343  
0.6315692187048493 0.4605463267794416 0.5942046569696255  
0.6914904264086573 0.4557599643094666 0.5836729286296041  
0.5204544025579926 0.5162910409368209 0.5613549203050996  
0.67807927414790 0.5019620928811150 0.4917113441322886  
0.6179464080635980 0.5083843261014886 0.5030888581379230  
0.4619417752832284 0.3858470616209305 0.6179953224174299  
0.4529303102506360 0.3257440255464843 0.6277914922427187  
0.3200122777065029 0.4999986301418341 0.4925515263152047  
0.4932952184732497 0.3036540481747556 0.5348800889897181  
0.5039990943309171 0.3631917797237375 0.5258957859088170  
0.3801762565728893 0.4926918667954226 0.5031111227703716  
0.1213902179263187 0.5295651590877858 0.5529494175049550  
0.4282090861196170 0.1272774924876937 0.5668073090665550

|                     |                    |                     |
|---------------------|--------------------|---------------------|
| 0.7374276757223948  | 0.4863876855106404 | 0.5743568345232645  |
| 0.7837873959305157  | 0.470258500022768  | 0.6027748608054933  |
| 0.8448268819771800  | 0.4645599429958738 | 0.6043727837510560  |
| 0.8777628901545350  | 0.4678043835006523 | 0.5537897056147053  |
| 0.8485146076564449  | 0.4771524318514236 | 0.5019732264102517  |
| 0.7874950336660861  | 0.4826290480729811 | 0.5004269588957481  |
| 0.4482340945102517  | 0.2675529105807966 | 0.5440361379375054  |
| 0.4061315497992518  | 0.2265879502507254 | 0.5352216535993570  |
| 0.3926039468813049  | 0.1666574221009632 | 0.5360988050613181  |
| 0.4901806132559380  | 0.2086932228285379 | 0.5963233904903555  |
| 0.4773202955359582  | 0.1487999796169399 | 0.5964948040111475  |
| 0.2618163668174192  | 0.5105623936550645 | 0.5755106638414400  |
| 0.2164937502140289  | 0.5663400819306523 | 0.5223048601136614  |
| 0.1553577996354121  | 0.5702052310794063 | 0.5221973895466747  |
| 0.2110684722159016  | 0.4821792375762400 | 0.5854731823341744  |
| 0.1497168237846811  | 0.4853669166194549 | 0.5846000101792578  |
| 0.5514662727294587  | 0.7320985175934003 | 0.5478428537062923  |
| 0.5097854585032620  | 0.7906852253963452 | 0.6003596109836585  |
| 0.5234005981970871  | 0.8504227638786921 | 0.6015990880062414  |
| 0.5945687638419841  | 0.7726519903903993 | 0.5402628198243161  |
| 0.6088494674726430  | 0.8323912710148945 | 0.5422246935709538  |
| 0.5732741647199373  | 0.8717368825554007 | 0.5729848046930559  |
| 0.6031498494097604  | 0.4195696399428698 | 0.5558317567163260  |
| 0.3081484169661666  | 0.5446279676322182 | 0.5854030222369886  |
| 0.3836198839038433  | 0.5602546564043372 | 0.6800642227878504  |
| 0.3630412030336714  | 0.5134554355319955 | 0.7174743437173633  |
| 0.5716994586911250  | 0.3893436404142506 | 0.6861221419391927  |
| 0.3904313944593098  | 0.4277298055894523 | 0.6781213695628613  |
| 0.4393006935617916  | 0.3833634100424014 | 0.6859531818745667  |
| 0.4278287777920791  | 0.6086561303523637 | 0.6897447077108639  |
| 0.5602672247810131  | 0.6147403344046880 | 0.6879269369375447  |
| 0.6090980551265606  | 0.5705981056384748 | 0.6790856300817382  |
| 0.4706832981132972  | 0.6329575690031536 | 0.6500551231972750  |
| 0.4705124734276662  | 0.6933823051654922 | 0.6595431161607527  |
| 0.4818020124836371  | 0.4795364339764999 | 0.6832640387653311  |
| 0.5155897736949437  | 0.6781559183453489 | 0.7517165740858308  |
| 0.5176006849838979  | 0.6175376752191098 | 0.7413758814737419  |
| 0.6365551189153528  | 0.4824822557670561 | 0.7158034452480146  |
| 0.6964359828551988  | 0.4876453803903584 | 0.7053621040929708  |
| 0.5177706932445593  | 0.5186355504164334 | 0.6834573491471313  |
| 0.6757277098758377  | 0.5324065847594022 | 0.61399755545869975 |
| 0.6153555265105837  | 0.5285755053557911 | 0.6252019781566894  |
| 0.4826816236750951  | 0.3796904353632815 | 0.7393721814885261  |
| 0.4850027422510297  | 0.3189057386351341 | 0.7488056286211516  |
| 0.3237527175442740  | 0.4683139488544124 | 0.6135948631726615  |
| 0.5286451507763910  | 0.3052156722728914 | 0.6557707349914724  |
| 0.5281409052855052  | 0.3657851793685455 | 0.6471417408976666  |
| 0.3841614508582604  | 0.4722186074898518 | 0.6246972703886511  |
| 0.1235028720199778  | 0.4547437462999027 | 0.6734212921312170  |
| 0.5018786168369869  | 0.1193948223822755 | 0.6889422152567709  |
| 0.7365221486902329  | 0.5252628439861925 | 0.6969023668033724  |
| 0.7850531541985846  | 0.5130735965269263 | 0.7250420524209682  |
| 0.8461929136796301  | 0.5178447451120174 | 0.7271403219530700  |
| 0.8781662946264915  | 0.5305466960758258 | 0.6774123013171148  |
| 0.8478863668439569  | 0.5386040245270599 | 0.6259503485568713  |
| 0.7868106217168591  | 0.5338502859138430 | 0.6239366345644335  |
| 0.4915867777324137  | 0.2606692648422319 | 0.6651956725449282  |
| 0.4597609197174534  | 0.2114781365151867 | 0.6559018063512544  |
| 0.4592618785945650  | 0.1500320757273498 | 0.6573118866693539  |
| 0.5447368025076246  | 0.2123697779588659 | 0.7182601431012782  |
| 0.5448135272196195  | 0.1510873756705418 | 0.7190371441692386  |
| 0.2646385536346843  | 0.4662605847503740 | 0.6967238960522474  |
| 0.2083973681319634  | 0.5131589744432522 | 0.6462866794999461  |
| 0.1478051101906946  | 0.5038379568666714 | 0.6458325789544231  |
| 0.2215117325095486  | 0.4249105170281289 | 0.7027809222371748  |
| 0.1607836736728884  | 0.4151804552058935 | 0.7019427185714415  |
| 0.5087710469661205  | 0.7374266885671975 | 0.6691363880402904  |
| 0.4573650529404324  | 0.7864327628647562 | 0.7234215230346265  |
| 0.4590762458457705  | 0.8476705980407747 | 0.7249689606391880  |
| 0.5413690005404740  | 0.7857794128857030 | 0.6598316039142266  |
| 0.5436806975458435  | 0.8471319825919997 | 0.6620365115328197  |
| 0.5024932573910814  | 0.8785409343013183 | 0.6947267119059606  |
| 0.6157713415316876  | 0.4379364922713437 | 0.6769844644693995  |
| 0.30303711713133589 | 0.5079355673610739 | 0.7071373478757906  |
| 0.3754805173073025  | 0.5365356528892977 | 0.8021382269605483  |
| 0.3638639710022552  | 0.4877449842133502 | 0.8418036211784867  |
| 0.5917151160138534  | 0.4038466845695095 | 0.8101688939885399  |

0.4070098509550559 0.4070334686212656 0.8058588562902358  
0.4636913469984515 0.3732640640833765 0.8146938842251410  
0.4100306477107415 0.5923079647980197 0.8122520752209457  
0.5381184088032024 0.6228683489730250 0.8154486584284490  
0.5946847951060761 0.5892012655104248 0.8055606655472188  
0.4572694644366821 0.6278329359904373 0.7734200265765213  
0.4474733477800542 0.6870328360776744 0.7842829738035926  
0.4865244248400400 0.4757503904427264 0.8078789607149204  
0.4726924651635312 0.6719293935675336 0.8833078519084598  
0.4848677304983693 0.6124628139120382 0.8717855514201324  
0.6388901466295163 0.5090516095556453 0.8399786190552058  
0.6968365293574459 0.5231648338673807 0.8274227224125665  
0.5151930021676943 0.5204499422915483 0.8080653781249237  
0.6665941705819447 0.5606192625189621 0.7353728303822122  
0.6080420429208776 0.5471074588508923 0.7484963963954080  
0.5185094530721230 0.3833045864042948 0.8706390079266875  
0.5300567221997633 0.3235157847804599 0.8812576642400924  
0.3330504465396247 0.4365137570939540 0.7378411128598431  
0.5523170840737823 0.3091287023706184 0.7814646647541337  
0.5429930016645094 0.3685116012093358 0.7714113116648660  
0.3920921073631033 0.4489789006360580 0.7498068058847812  
0.1334255016012229 0.4079565824194442 0.8119450180154912  
0.5390357951969145 0.1223714472184801 0.8232009715161753  
0.7270716321167658 0.5668210221587281 0.8170730544125981  
0.7704914558669490 0.5814195414588679 0.8477749474573313  
0.8277774956144019 0.6025780868953112 0.8520818560759744  
0.8624710415544522 0.6092578341666930 0.8029865329578787  
0.8386417469587536 0.5946204791129450 0.7497479784692426  
0.7811820937512983 0.5736770837880028 0.7453414134926553  
0.5310563676641550 0.2623684115433770 0.7963048965583680  
0.5147859499601569 0.21378044496059977 0.7751495432139317  
0.5133690475204722 0.1525741356841568 0.7771720292814001  
0.5667696513440705 0.2160761908798249 0.8652363086914010  
0.5659857663054551 0.1546689221317398 0.8668883712822915  
0.2738687987546605 0.4316898728523478 0.8205126122136374  
0.2124269097249743 0.4529432856832716 0.7576246598115660  
0.1530256005116396 0.4396548626246286 0.7643101626657683  
0.2337707742671673 0.4033451870459515 0.8467073907630882  
0.1743662592479694 0.3899931883921937 0.8532640280744894  
0.4693507939701513 0.7341244450620602 0.7994565909221846  
0.4323573864867072 0.7787047555889662 0.8687868411691245  
0.4326746604914965 0.8400565719023843 0.8717415159667304  
0.4857752386749850 0.7833594740659250 0.7795806228939942  
0.4867315779133820 0.8445303337579160 0.7829194740299305  
0.4601345042455143 0.8735048608688801 0.8291695576867368  
0.6261619993383560 0.4597661943314495 0.8002305954891711  
0.3053889825891712 0.4748893566839806 0.8302815020148454  
0.2959746541728562 0.6407443077223062 0.181461698849172  
0.6545107017840641 0.6985169543816923 0.2015705048896403  
0.5084399316790481 0.4532578826117854 0.1907355923435444  
0.4508658349086436 0.4966052030503889 0.1908352194005856  
0.5537711187915582 0.5099481751912079 0.1915489649807788  
0.4961943085899438 0.5532837762518625 0.1915793260801407  
0.7024051674509018 0.3554216255045038 0.1864943608618217  
0.3474985351613669 0.3099263103242093 0.1959501127042204  
0.2773707617709659 0.6094475973766298 0.3127201496910977  
0.6240714644637804 0.7162115905616446 0.3254558301563307  
0.5162070184325923 0.4530960100848585 0.3157063719068224  
0.4515697517778958 0.4856419880148219 0.3162507982030991  
0.5505487125292402 0.5168464823686115 0.3163920615703344  
0.4858603913922748 0.5494039637387910 0.3169168244787740  
0.7249648316339556 0.3938521306419857 0.3113362822605351  
0.3753241422373952 0.2879583131457848 0.3201303551882461  
0.2597302933086295 0.5652748088112710 0.4334107661265619  
0.5845089823960792 0.7334241869186643 0.4468474045962160  
0.5219877789861094 0.4556168765191510 0.4392042661146991  
0.4528131859502598 0.4766670947175135 0.4391944860540379  
0.5449579019561214 0.5244447166698992 0.4394905170030732  
0.4758431102798443 0.5455340062453369 0.4393947954474904  
0.7381513783019883 0.4344013133915153 0.4325581315498208  
0.4152021132183086 0.2670253014586844 0.4427421731891233  
0.2525527394304149 0.5211074906598027 0.5550554703312743  
0.5441954592920057 0.7436365262921109 0.5685591243421767  
0.5303870703609991 0.4599471533096804 0.5608494858061160  
0.4585345973805078 0.4682264002906404 0.5607209112513427  
0.5405227585340499 0.5316989049504448 0.5615030394670770  
0.4687053328920565 0.5399792055265623 0.5613852629130175

0.7468066356525581 0.4796780789706684 0.5524959534103854  
0.4556808009791511 0.2558110166610853 0.5645852300436640  
0.2534090518996772 0.4745564739130967 0.6762556997619021  
0.4991071798496117 0.7472235967313389 0.6897717969052879  
0.5371933594122659 0.4651761619431454 0.6828080842538476  
0.4648434868543415 0.4607596414235246 0.6830576345068434  
0.5347153847513448 0.5374260142412405 0.6835490678911100  
0.4623539916020322 0.5330071107797150 0.6836939090499516  
0.7470720842948436 0.5204599558526387 0.6750848407383238  
0.5015213734450815 0.2507871621154765 0.6856686707031221  
0.2609966225620389 0.4365216946038831 0.8001104115132603  
0.4600134355688681 0.7423272475080930 0.8207534808241217  
0.5441063706781645 0.4722764992183742 0.8081665139934739  
0.4737039999589687 0.4539400162290071 0.8081740443213152  
0.5280290588167107 0.5422496145280844 0.8084457651546224  
0.4576319599469788 0.5239363510048234 0.8088455421439241  
0.7391680046453798 0.5646408712595307 0.7958182736496041  
0.5402062240077736 0.2536854474877726 0.8174907087422112  
0.6898196532301983 0.3597405635315814 0.1327599205762806  
0.3604079055792875 0.3130383440215097 0.2497048023254543  
0.3150196268775428 0.6452838519324609 0.1295977975081476  
0.6400569167556049 0.6945400766806958 0.2548886121218402  
0.7095721063128801 0.3895452302308944 0.2582665047632397  
0.3940566553470314 0.2890101676555710 0.3722741293240246  
0.2940481368325395 0.6160500659610483 0.2602688200306789  
0.6054263672168915 0.7129866892991986 0.3774945958922858  
0.7223590708299856 0.4246567400467010 0.3802710146281390  
0.4301935631721166 0.2731832996064388 0.4956882774481402  
0.2745187076538427 0.5761928710670596 0.3811181615846909  
0.5689826560849810 0.7263220198092742 0.4995268459730152  
0.7327447914947205 0.4684708373348877 0.5000349375287714  
0.4712203745036698 0.2640885731960154 0.6170900019828074  
0.2651871926533826 0.5346124831868669 0.5027995001338631  
0.5287261813894863 0.7348586124403784 0.6209982149897385  
0.7353997322735546 0.5088459322137647 0.6221744812571777  
0.5152610057819011 0.2623788364781586 0.7381070029351755  
0.2629855989596200 0.4904892525485420 0.6240830712475829  
0.4852027972719479 0.7350922742730254 0.7420702934598981  
0.7304798074772503 0.5492017271440076 0.7432668938654873  
0.5551020872680685 0.2690996248493090 0.8686676036622496  
0.2693522448302568 0.4498344798707828 0.7469528423240398  
0.4454800612118104 0.7258830259393583 0.8717455620536428

C-CENTERED HEPTAMER

1.00000000000000

40.406205999999974 0.000000000000000 0.000000000000000  
 0.000000000000000 40.409067999999978 0.000000000000000  
 0.000000000000000 0.000000000000000 46.8059700000000021

C H N O  
 504 350 56 28

Direct

0.2242384090314729 0.6897008748332815 0.1327715294074308  
 0.2412903594384121 0.6505899404612839 0.1794909780066171  
 0.2099445390419383 0.6648131820012971 0.1778683499681965  
 0.6413377899832183 0.6796612758865587 0.2076212425187142  
 0.6819305368456595 0.7194824440906481 0.1853789807368469  
 0.6809147779580472 0.7449391614645237 0.2057282200978448  
 0.7031387524526352 0.7712553833595547 0.2035263897675649  
 0.7051766646669746 0.7208674651649460 0.1630743442218075  
 0.7271806854955453 0.7472966919195470 0.1611496619032023  
 0.7263310212329845 0.7726546749664577 0.1814394506228215  
 0.5367299801560206 0.4356565654409217 0.1689137175055937  
 0.4977729289818582 0.3961969866463682 0.1744125120774159  
 0.4343159034221738 0.4670610459397032 0.1747499319972295  
 0.4280134275667676 0.5220723642458884 0.1674885444084084  
 0.3957544840561455 0.5072504564762632 0.1679525124485650  
 0.3995627345870653 0.4739268013591085 0.1727251297724765  
 0.5756930309802679 0.4838121963160451 0.1686310536567159  
 0.5690760008847686 0.5388160186932330 0.1759396500895124  
 0.60387522296870485 0.5320113535440278 0.1746117739042645  
 0.6078916017736142 0.4986923934275808 0.1699234806376044  
 0.4668698540477121 0.5702372586626908 0.1688671764633794  
 0.4725655323117824 0.6057623282946965 0.1708325265530879  
 0.5054426004257615 0.6096821193839619 0.1760383631099058  
 0.4835576220775849 0.4293594404776390 0.1749629960012163  
 0.5307569684973666 0.4001117170649372 0.1697847670231686  
 0.5198483326899936 0.5765741089938110 0.1759016887908449  
 0.5540903981026319 0.5701182422841343 0.1787695307998273  
 0.4351989535329748 0.5560636740239161 0.1653318613328572  
 0.4492639289113752 0.4357525144205634 0.1774482309533309  
 0.5685823506341925 0.4497902915328766 0.1662064997470104  
 0.5768873367453772 0.5982083957879942 0.1851652680519512  
 0.5821082141859706 0.6241912955382379 0.1657520254752146  
 0.6032783517088777 0.6503183167499665 0.1724796609294716  
 0.6195213393169662 0.6514104359887886 0.1990010707593967  
 0.6143201745439070 0.6255755075399387 0.2184727184634220  
 0.5936792016385698 0.5992114882317695 0.2114870149960904  
 0.5976892235771813 0.4277937037116989 0.1610694111626769  
 0.6090425786034751 0.4054134058974402 0.1817944957061268  
 0.6371426441264991 0.3861070365976553 0.1769389941184484  
 0.6542879242456648 0.3882297148588891 0.1509540245282878  
 0.6425486092434144 0.4100431395334405 0.1299372956098675  
 0.6149827541071827 0.4297952168162471 0.1350356799169413  
 0.4263916029966987 0.4074663417520207 0.1829610820077174  
 0.4094196922625321 0.4054322275766016 0.2091448625800470  
 0.3887348049811907 0.3787911527675842 0.2152108690700236  
 0.3836972857836142 0.3537345422511790 0.1949655513497975  
 0.4001425380876451 0.3558824399605644 0.1685855318076859  
 0.4213164425587037 0.3822862271710599 0.1627519692575186  
 0.4061386144949301 0.5778954910580939 0.1593420214617028  
 0.3920705132990835 0.5780194963091669 0.1318751391940712  
 0.3641214316188925 0.5969212435740862 0.1259855246170509  
 0.3487336826919559 0.6154688051259636 0.1475806120267477  
 0.3627810501460928 0.6156396621364513 0.1749680489457223  
 0.3914199136230598 0.5973906165582745 0.1806223715965326  
 0.2011282213120982 0.6844240604939394 0.1544730509100943  
 0.6835826817625776 0.3670784289017180 0.1431826997717137  
 0.7290822062673501 0.3333674320874080 0.1648208534176402  
 0.7429098609270361 0.3238856978342395 0.1911700467546122  
 0.7692054176876314 0.3016436480170323 0.1921202099787512  
 0.7821956093290185 0.2883950393648437 0.1669073183984688  
 0.7684735775099867 0.2978536666513651 0.1407802892710464  
 0.7421382186862663 0.3201679951331235 0.1393903789026228  
 0.3617586174474184 0.3251847168023428 0.2026015779908797  
 0.3217608752773907 0.2860186423096881 0.1787013277263883  
 0.2989889666998073 0.2854169682373660 0.1560055714844749  
 0.2770409320539631 0.2590711642312049 0.1530331219759000  
 0.3223437332180228 0.2598483822082490 0.1983843577500627  
 0.3001879961399898 0.2336138410703742 0.1951321714826108  
 0.2774847806284641 0.2329941508301799 0.1726406756456597



0.3185051351415454 0.6348121319436465 0.1390776301004131  
0.2644067308052646 0.6556898937318553 0.1574591409970957  
0.2557418597854853 0.6755798107383015 0.1339587305781827  
0.2068948450644829 0.6632174458979588 0.2585011871579900  
0.2177696185031354 0.6043512547877583 0.2881704044093383  
0.1861208596614705 0.6180519549289014 0.2870645849750181  
0.6079214990438325 0.7002573093431302 0.3153627941600709  
0.6447300146307288 0.7439113697190107 0.2960156803614474  
0.6327044031498553 0.7720971753064896 0.3100401508497115  
0.6521358459592291 0.8006107790099019 0.3112154083337887  
0.6761649656689923 0.7445885688477422 0.2833116023090618  
0.6954088912963527 0.7732025145460784 0.2846934978436635  
0.6835059948482851 0.8013452284247771 0.2986634997801624  
0.5470684687230022 0.4412102647951745 0.2811481070195276  
0.5160225683396634 0.3951527417042464 0.2859986803854225  
0.4407377803778073 0.4531770181601265 0.2873294434263543  
0.4244062659942946 0.5062734480711729 0.2808665710896212  
0.3954033204445631 0.4858160337004238 0.2815071786962812  
0.4052958108740496 0.4536513703628377 0.2856922221676870  
0.5766209327793070 0.4957418561022310 0.2808760367875824  
0.5602367456589735 0.5487312668861030 0.2878623688493538  
0.5956858145645815 0.5482839350961040 0.2864559650105106  
0.6056212535354556 0.5161834248028775 0.2819703956287748  
0.4538845184619328 0.5608159734746350 0.2819334110370545  
0.4531893680521939 0.5968632010804045 0.2830304196577960  
0.4848812826129545 0.6067622338789624 0.2876385348527717  
0.4959890062372266 0.4251289099424922 0.2870182107925905  
0.5477034430606312 0.4051331985178409 0.2814870990035026  
0.5049591730566795 0.5767788612734657 0.2879744290829178  
0.5398270249020402 0.5768521823438433 0.2904208395133411  
0.4252242193253544 0.5410575561948820 0.2789320694992363  
0.4611251051603680 0.4249978516478312 0.2895691367134410  
0.5757755108418259 0.4609860499016962 0.2785085620250404  
0.5572015894364201 0.6088152026908918 0.2959240894355622  
0.5570963755371859 0.6348678856115070 0.2760660631799495  
0.5739693528114076 0.6642982943952358 0.2816601922754157  
0.5906753167495425 0.6687056146734913 0.3076487423619662  
0.5904638324026142 0.6429746274667966 0.3277307720945134  
0.5744467444034840 0.6132974337565693 0.3217444216350363  
0.6082543524206904 0.4445291577134061 0.2732161354543496  
0.6225445817121833 0.4228690015824706 0.2931716181935190  
0.6532287955985571 0.4082303924755126 0.2879792907691842  
0.6700747822694898 0.4142984554909911 0.2623212415636643  
0.6556998951256255 0.4355455993082932 0.2421428537782664  
0.6255180576077298 0.4508171272410695 0.2476839529488107  
0.4435910606878042 0.3930308387819429 0.2946821377657002  
0.4258196498673496 0.3884538503123817 0.3202313476259596  
0.4091715823561686 0.3589935880123509 0.3257112344784319  
0.4089335158559567 0.3335063698435562 0.3054002892579216  
0.4263520217629187 0.3379116037225159 0.2797567290664879  
0.4437520240632932 0.3671527597178434 0.2746452742021950  
0.3927545689600851 0.5575181156013784 0.2735448455785146  
0.3762593389378069 0.5521204098479658 0.2474847462024526  
0.3460851288977204 0.5673278756335777 0.2417728505275961  
0.3309502136942818 0.5875556939468560 0.2623053768173096  
0.34699680886635858 0.5927073820462676 0.2884843264305990  
0.3777199264778345 0.5781974815318475 0.2938483021028264  
0.1804906057553472 0.6475141854563140 0.2722140192430738  
0.7020224792967987 0.3977137937418249 0.2545221000779270  
0.7554111242058488 0.3781708296160918 0.2753930297889004  
0.7685510201377000 0.3662394176335205 0.3012007330610067  
0.7994425496305054 0.3509277135776713 0.3016586396610374  
0.8176308587943987 0.3472378359360334 0.2764589201725004  
0.8046273586318373 0.3593283468903086 0.2508631539713913  
0.7737706953330170 0.3748333064279779 0.2500858037564050  
0.3907288714353335 0.3022886652537592 0.3124457255516815  
0.3543953369173899 0.2592050893910708 0.2914316966747444  
0.3241432486428745 0.2586141132520320 0.2767381073667723  
0.3045889735068018 0.2301709992370425 0.2771431820131474  
0.3649537866991298 0.2310993193722406 0.3064269696750497  
0.3452195855165657 0.2027687426497202 0.3066123759028316  
0.3150067599318515 0.2021163966465712 0.2920971880195529  
0.2989527245193117 0.6040952535788539 0.2546608407686354  
0.2441646336524399 0.6200493227816236 0.2741892310039252  
0.2386452171833267 0.6496740688697441 0.2593172731622960  
0.1790518309030530 0.6016102162289454 0.3649724099798997  
0.2024821554381172 0.5483697080134029 0.3970442024035075

0.1686403801121658 0.5550363851909647 0.3959389113449647  
0.5714177920226928 0.7154938509589449 0.4223030348647392  
0.5977550120160120 0.7657699554457394 0.4022770236656198  
0.5816286368322134 0.7905261511311977 0.4179869969572913  
0.5948592540505947 0.8224022076513944 0.4187962603345659  
0.6269675358443508 0.7732624377727756 0.3874405763366485  
0.6400612676696985 0.8051661497911189 0.3885713547532299  
0.6241153268657602 0.8298924756994221 0.4042535929148476  
0.5555355122852316 0.4499426367450322 0.3897992258318879  
0.5329290906269927 0.3992214620338306 0.3948318275278327  
0.4486057308907664 0.4432354223923378 0.3955264122512123  
0.4231038830750198 0.4925828814064893 0.3889429178495144  
0.3981712231058862 0.4673383744617400 0.3899594775559614  
0.4136205426715081 0.4374516846498662 0.3941712406878812  
0.5749864885253891 0.5088244204690131 0.3892210054328081  
0.5494201100557995 0.5581756914531663 0.3957386589485198  
0.5844086385918215 0.5639729348652068 0.3943630283453162  
0.5998893365543393 0.5340950270264488 0.3901625965094090  
0.4425444693862825 0.5514888043889026 0.3895185514121461  
0.4355838973366819 0.5868740356421153 0.3902678470672940  
0.4650552863202491 0.6022043857002370 0.3948070845868208  
0.5079594425787759 0.4252582817387220 0.3954170075024050  
0.5624435757770581 0.4145389712524099 0.3904936249149030  
0.4900695518142393 0.5762030160517534 0.3954434772135599  
0.5243997235254568 0.5823673886749486 0.3980350155181793  
0.4177785972286511 0.5269689462180623 0.3867371321610437  
0.4736292936959785 0.4190704744678420 0.3978162953784298  
0.5803456444425681 0.4744385074110922 0.3871292190983293  
0.5360460665971477 0.6168680025797117 0.4034033105430274  
0.5310941247444787 0.6425977495476605 0.3836830524883776  
0.5430173983861909 0.6744080316204411 0.3890717497450432  
0.5595383328397814 0.6814959850067119 0.4147064718785923  
0.5640921287784041 0.6560415251380906 0.4346721339328631  
0.5529661443001200 0.6241563462388352 0.4289171058761903  
0.6152403863409429 0.4639488158068148 0.3818527321012986  
0.6333575603653846 0.4454280067718317 0.4018539567089375  
0.6660892687937037 0.4363392960505694 0.3964782903436829  
0.6813400069516270 0.4448577764375571 0.3705873437693958  
0.66323422364092756 0.4630188663603585 0.3504072064220508  
0.6309158380873687 0.4728635280312925 0.3561412956263900  
0.4619712283460197 0.3845085103454034 0.4028323844096636  
0.4450655044993180 0.3768153887720218 0.4282606611389718  
0.4339303054574983 0.3448395891063549 0.4336188219317744  
0.4383976222661211 0.3197509295459793 0.4132974854858316  
0.4548731458799740 0.3272519853622408 0.3877403681724657  
0.4668745141200519 0.3591240901134858 0.3827747322702786  
0.3828632182127939 0.5371880550364133 0.3812136670194051  
0.3675010612011917 0.5276231026679404 0.35553066492396578  
0.3349321625310486 0.5364434281781939 0.3496898599116719  
0.3163195162950374 0.5542219593866563 0.3697625875336324  
0.3312981747096152 0.5636156338362066 0.3955408724707806  
0.3642871079329700 0.5555563225981874 0.4010001398226631  
0.1567260178458011 0.5816372651251284 0.3798832356426626  
0.7155996611398789 0.4339174233231168 0.3626394307717725  
0.7718528532094395 0.4245951329441536 0.3833519786044473  
0.7870747787712623 0.4166274807090060 0.4094495549374945  
0.8201437090811585 0.4069281550797055 0.4101352184262282  
0.8385123364915099 0.4050324596990494 0.3848828348632699  
0.8234051319759618 0.4131753170007381 0.3589887802048209  
0.7902989491096155 0.4229905375759998 0.3579655524440901  
0.4264445217523737 0.2856556429812035 0.4204338550452140  
0.3983657075083100 0.2364914837236309 0.3999171962095825  
0.3691972158428992 0.2299824006433648 0.3846580034458746  
0.3552167272703384 0.1984453895301228 0.3853006521076722  
0.4135719997103677 0.2111003755616601 0.4155593249598590  
0.3994157410696288 0.1796047793235789 0.4159048718962827  
0.3701951105574325 0.1731027358788265 0.4009634411075567  
0.2815429404742530 0.5634700643565532 0.3620709063274906  
0.2247836076940927 0.5683079941298315 0.3818268766139879  
0.2129431439054140 0.5951026569539331 0.3657546099113344  
0.1675886408200420 0.5478850422969143 0.4738630097745370  
0.1989499603211579 0.4980764560605034 0.5049965758569801  
0.1644822133479666 0.4994242806070395 0.5038704355805734  
0.5342583719451569 0.7251016700112981 0.5300486231086066  
0.5533583260565786 0.7786478841828223 0.5102176688532533  
0.5339136461320726 0.8007669129150010 0.5260651738020931  
0.5425433367611644 0.8341750870100254 0.5270948360353152

0.5811992603946700 0.7903103839855333 0.4954136723499916  
0.5896673390956763 0.8237285759854186 0.4967417892361764  
0.5704540333014980 0.8458278659881207 0.5126162114480564  
0.5642235797099791 0.4610096373791876 0.4971612205816396  
0.5510777762933117 0.4070358980161812 0.5019659288183124  
0.4603035684896129 0.4354286124214182 0.5028346579023797  
0.4265525672105719 0.4795846913188903 0.4964043482697003  
0.4064335234244407 0.4503622830938201 0.4974550567693593  
0.4268710851292509 0.4236234775660910 0.5015668238875015  
0.5728719912255152 0.5224414952721211 0.4970510783327319  
0.5390664139689700 0.5664996565556776 0.5038022523488397  
0.5724978135925115 0.5783356405741320 0.5026746009235776  
0.5929669744728425 0.5516668545908711 0.4983325213508380  
0.4351974650914607 0.5410334296729878 0.4970393417623305  
0.4220784626425263 0.5746396949957568 0.4976591551830825  
0.4483412088807621 0.5949498743296362 0.5023262857920702  
0.5218511478782956 0.4281681355935413 0.5026724727481836  
0.5773715140855803 0.4274174309775448 0.4976822527235457  
0.4775328666927843 0.5737792125948572 0.5031897724484278  
0.5101915318621247 0.5859227582840619 0.5060063486628519  
0.4152047118052439 0.5124893035325588 0.4942265074775436  
0.4891611529341032 0.4159868519010744 0.5050396136632508  
0.5842300327429025 0.4895762264609177 0.4946669432250818  
0.5156608783775609 0.6219276612802862 0.5113926276252945  
0.5068278036738723 0.6463784527810621 0.4914723591172094  
0.5133383612424751 0.6797423977747933 0.4967727745444169  
0.5280944709835560 0.6895943314116483 0.5225298477692104  
0.5364420743238341 0.6653477797861903 0.5427087834513650  
0.5307846315074406 0.6320361657230459 0.5370315648504329  
0.6204148255709279 0.4856002078458124 0.4892363121002325  
0.6417111203047556 0.4704318393420709 0.5090002079078617  
0.6755335658145609 0.4676146261644184 0.5034759033043712  
0.6888165290632613 0.4791828654177190 0.4776591544991373  
0.6675875066256793 0.4939616008844659 0.4576922885037250  
0.6340451984961147 0.4975945064476136 0.4635870004429830  
0.4837008635303119 0.3799003770893205 0.5099712370267365  
0.4682332591931846 0.3693518711343158 0.5353218264745970  
0.4626798301663289 0.3359374231725241 0.5405910159009726  
0.4714807964806900 0.3120196919334707 0.5202671312789843  
0.4865824430470796 0.3223021281988164 0.4947958554961069  
0.4929804136947002 0.3557739717147007 0.4899087575149174  
0.3790074266587491 0.5163774521771820 0.4887991819977427  
0.3653481768643387 0.5041676037811621 0.4632299669275733  
0.3316957484241546 0.5071946635815359 0.4575473404389386  
0.3103981745523070 0.5216318659997567 0.4776419151277498  
0.3237267880976926 0.5335621351617827 0.5033226954837321  
0.3576458363574664 0.5313363147029487 0.5086356565513250  
0.1486196321616047 0.5242904108104434 0.4882936095166865  
0.7244451645317460 0.4748939901969186 0.4695257170431807  
0.7816181488835614 0.4759867076006233 0.4897370925754813  
0.7984276616963976 0.4698892247805334 0.5154794939227326  
0.8327412932476401 0.4665189284254488 0.5156822167311741  
0.8507689725630371 0.4691252623915663 0.4902949995950153  
0.8340380163872481 0.4754255320795653 0.4647625827680829  
0.7996812345086177 0.4789592425474494 0.4642393619871901  
0.4656104183973803 0.2763701201848728 0.5274294173557577  
0.4475265263823020 0.2227052419502923 0.5072525781837218  
0.4196804302940019 0.2106140385579319 0.4927230199317510  
0.4120200113041352 0.1769892878047400 0.4938123350262511  
0.4677336754261223 0.2008348973081248 0.5226369284248134  
0.4598979023151749 0.1672242926544448 0.5234275159404732  
0.4320277694694648 0.1551189639745953 0.5091772682638783  
0.2744922832188659 0.5248810640853495 0.4701466823503828  
0.2178943820437807 0.5216350638252580 0.4902735045866274  
0.2020797679447805 0.5466743802326335 0.4746679105112542  
0.1640665103036689 0.4836378651841974 0.5817764465338015  
0.2058565793802087 0.4424732900028320 0.6131524972309268  
0.1719816316590847 0.4360221011853886 0.6121190622671004  
0.4956950331831205 0.7277043763359278 0.6382238042230702  
0.5058545424323623 0.7837612579967087 0.6185620682110978  
0.4835828451598029 0.8023844375103729 0.6349814360333264  
0.4867811403183206 0.8367463170818484 0.6360237511715308  
0.5309559589551165 0.7998223091581180 0.6031820015478081  
0.5339979838850845 0.8341521873901434 0.6045534063674579  
0.5119985183543138 0.8527980405442052 0.6210216506634932  
0.5700398494236235 0.4730750974204294 0.6039531881521764  
0.5662160050616684 0.4176628717427751 0.6089000727982053

0.4719846209670118 0.4301584208486861 0.6104239383040225  
0.4310708997830068 0.4677596936089123 0.6039628897633297  
0.4163215159570071 0.4354999677130573 0.6050902003922624  
0.4411016675835227 0.4127292569374640 0.6092333055593143  
0.5681414972542395 0.5350551774841410 0.6039990826947076  
0.5272160857191660 0.5725344260771299 0.6110164578536639  
0.5581108558244120 0.5899835682610026 0.6100721000039154  
0.5828833121597439 0.5672941038942982 0.6055764617266458  
0.4291208758252004 0.5297369013239845 0.6045063770247991  
0.4104755482023631 0.5606144295232706 0.6053107073601726  
0.4329262381599658 0.5850854909144469 0.6099164377044854  
0.5338614139998391 0.4335712663364789 0.6098556724713742  
0.5886431965983382 0.4421689362252820 0.6043660089221153  
0.4653052907186682 0.5691840894994222 0.6105643579249450  
0.4954363788265002 0.5866751837526601 0.6133833927878055  
0.4142483603398540 0.4982252506262059 0.6017976028174395  
0.5037669179389668 0.4159876488263377 0.6125551904312925  
0.5849508574026496 0.5046156394551801 0.6014478877899984  
0.4946883480152755 0.6230252112412310 0.6190137111864304  
0.4818421724883105 0.6457750180756177 0.5992287230483482  
0.4826303902057917 0.6797147774335910 0.6047150487088417  
0.4955179534036008 0.6917121596697989 0.6305338799131628  
0.5078019577321955 0.6690693852042738 0.6505980576820684  
0.5078476793656734 0.6353278853863873 0.6447366601630563  
0.6212694859407146 0.5069581741713933 0.5959336148578737  
0.6449740370091007 0.4951647967747506 0.6153780827118333  
0.6787603639876844 0.4984619922839857 0.6098547755748649  
0.6897764120959907 0.5129264472807928 0.5843297437663272  
0.6662181081387186 0.5243094411528266 0.5646446027175672  
0.6325713776006801 0.5218418152020539 0.5705642187300101  
0.5046110859455234 0.3795100494269671 0.6176774873097909  
0.4916690456342239 0.3666118163362964 0.6432707626920735  
0.4919179903345306 0.3327442215116540 0.6486230880985572  
0.5041508293833915 0.3105352035184220 0.6281717182635127  
0.5168139645882867 0.3231288339571648 0.6024824153070392  
0.5174077455835667 0.3571911837356547 0.5974988471712576  
0.3778932474112359 0.4958608316935922 0.5964758901648564  
0.3665306099988886 0.4817213854487119 0.5708204087647654  
0.3328546331015526 0.4787847548451698 0.5652254169839130  
0.3094245829690899 0.4889635264656339 0.5854911452436014  
0.3205006004683828 0.5028445024471814 0.6112376365135374  
0.3543032594458869 0.5066171039966099 0.6164628093201865  
0.1509086798762334 0.4565169771167564 0.5964023003809277  
0.7256080780003836 0.5151749002169759 0.5761924686251934  
0.7817218055858197 0.5263260105987783 0.5964230719681305  
0.7992445763133231 0.5239960980633890 0.6222779876730280  
0.8335995759172214 0.5268432749478145 0.6225439679208303  
0.8509822099239868 0.5320547563797327 0.5971187974764809  
0.8335062321020257 0.5346018978162279 0.5714735286497216  
0.7990720752291941 0.5318483307119130 0.5708672568503601  
0.5042562687007371 0.2743719170173063 0.6353888422618410  
0.4945598100033207 0.2185431137950686 0.6150643252477687  
0.4691956018358533 0.2024342457729659 0.6000530048205946  
0.4666644187846415 0.1680325043659312 0.6009707627457471  
0.5175490109671750 0.1998966884440980 0.6307035115737231  
0.5148459703308805 0.1654833025185224 0.6313214790590000  
0.4894092765911947 0.1493642986242286 0.6166435921121021  
0.2735188070320143 0.4854450409029794 0.5781131516384918  
0.2190179630767560 0.4695227483939295 0.5981960302490987  
0.1979523227347018 0.4902311452683328 0.5824696082543405  
0.1725673198395687 0.4271209383930764 0.6898551698094082  
0.2210783490243300 0.3920811633350046 0.7195312719237288  
0.1887993370412759 0.3799361984966427 0.7181950124916204  
0.4559192073367119 0.7224186571946986 0.7459211961967753  
0.4539923526256949 0.7793104528756205 0.7263904924441476  
0.4270963297943325 0.7922242436902025 0.7417011465622196  
0.4224463415604025 0.8263992463373734 0.7429978598684608  
0.4758623441639650 0.8008146118842018 0.7123688301780414  
0.4710226415406102 0.8349393243710220 0.7139382314846768  
0.4443698716022195 0.8479248869401148 0.7292947341522934  
0.5745609899534115 0.4843039668149116 0.7122009037239165  
0.5803312915993099 0.4290774824202953 0.7172537105501325  
0.4853585154160036 0.4253245991598262 0.7190766195044515  
0.4387016240617692 0.4554439848393364 0.7125232718912130  
0.4295976550721142 0.4211681008449454 0.7138396877914479  
0.4578613960653889 0.4029158565442417 0.7180490710631180  
0.5621401909376462 0.5450752092850265 0.7122526946580495

0.5155317767718135 0.5751145832058429 0.7193346879803719  
0.5430247594835007 0.5975282624263777 0.7183023625930308  
0.5712654103384659 0.5793341208259386 0.7137712430483205  
0.4262375653727812 0.5162012295882917 0.7128310868102344  
0.4025857954510553 0.5434304864671147 0.7136657175935941  
0.4205203564228240 0.5713641015467444 0.7183446233704951  
0.5457329286884363 0.4392167405408763 0.7182586428578703  
0.5982114192491230 0.4570515778879068 0.7126156487593092  
0.4551415164969097 0.5612330186905553 0.7189354291319394  
0.4818252297838135 0.5836430705050474 0.7217143975847776  
0.4169925280047236 0.4826050041075273 0.7101833168320754  
0.5190838506044405 0.4167807951668229 0.7210874413138414  
0.5838128132324167 0.5179182108834263 0.7096447937462558  
0.4747503030122860 0.6193433203847248 0.7271447225023184  
0.4581849784962932 0.6392410514223016 0.7071350812148123  
0.4527230068917578 0.6727950386718333 0.7124072244473657  
0.4629196163262745 0.6870916871874001 0.7382394050401134  
0.4789819695579780 0.6672231846325202 0.7585027069773292  
0.4852791980957787 0.6340109841819931 0.7528538059134845  
0.6191706140544108 0.5263458935420890 0.7040235847970473  
0.6445087358721416 0.5191135167045436 0.7235980856655896  
0.6772344583081631 0.5279957117093359 0.7179571206765686  
0.6856090776036567 0.5437422569458704 0.6922441504160248  
0.6604776759998686 0.5505680473871778 0.6724475724692176  
0.6277515078015697 0.5424520380051664 0.6784278329773219  
0.5262316798498327 0.3810164921220957 0.7260995773307608  
0.5161030155025943 0.3659886149230827 0.7517750453833391  
0.5226859575500661 0.3327562636070540 0.7570919194918785  
0.5386336294118702 0.3132253525476825 0.7365146643170772  
0.5483120037638506 0.3278538425227548 0.7106685305093005  
0.5425584477596616 0.3614256773749694 0.7057231418022342  
0.3815945607133662 0.4741106338717181 0.7047803049114844  
0.3727849768854556 0.4585092846317274 0.6790092500760099  
0.3400760686294843 0.4500553999733835 0.6733052355078709  
0.3152384659214699 0.4560549473547339 0.6935693794391893  
0.3238220108443398 0.4713342376402751 0.7194414035991891  
0.3565225411584210 0.4806075729882325 0.7247891036923789  
0.1643945925937943 0.3973622207864516 0.7033263952275118  
0.7204220108373002 0.5524553273667289 0.6841506193478437  
0.7737709053361496 0.5726521896677619 0.7046258489954756  
0.7926240399963856 0.5697075398342325 0.7297075934037816  
0.8258534965252442 0.5789526473763853 0.7298687461218307  
0.8407348393161493 0.5911651741097260 0.7050618442887325  
0.8219326764643143 0.5941075699462510 0.6801497066522009  
0.7886093933891803 0.5850177330295490 0.6797015447471171  
0.5461807712466441 0.2779066287664143 0.7438191798319290  
0.5483025679659197 0.2212742717331970 0.7235311129945134  
0.5270862273196436 0.1999141651216079 0.7086058509245199  
0.5323276982145773 0.1658161949966184 0.7094791133144341  
0.5749918607769187 0.2082295987869059 0.7390393555260159  
0.5800579454622455 0.1740811248230361 0.7396111405212322  
0.5587696404393450 0.1526965635665396 0.7250242239526696  
0.2804552114078052 0.4466253524627345 0.6860711039201391  
0.2292231030209102 0.4218969772794450 0.7058781159198687  
0.2047881249764268 0.4394651420773694 0.6909887986633556  
0.1876860190212841 0.3751176943378397 0.8003329645793148  
0.2363534211102572 0.3608252575132833 0.8405047403983696  
0.2052126468699186 0.3463255374122072 0.8428512647264238  
0.4188932720893989 0.7097444018118200 0.8613564259494014  
0.4134807137064019 0.7676608714952277 0.8433560120724665  
0.3954878615446052 0.7809109229255311 0.8663954660177221  
0.3898930027325117 0.8149726941628391 0.8676355582753781  
0.4254058508479516 0.7888988556335617 0.8218889360535915  
0.4196611963407525 0.8228285699126759 0.8235560877973712  
0.4018893807556954 0.8361476547985253 0.8464554584206377  
0.5762196545074076 0.4975844310467648 0.8250546791191965  
0.5915406500766437 0.4441600353555686 0.8298608484120303  
0.4990218485992622 0.4233514425283852 0.8322892252322840  
0.4475671294573956 0.4438330243192553 0.8250891954409351  
0.4451132498143113 0.4084882766873097 0.8268989604992932  
0.4762944284558738 0.3960820183465193 0.8316335669942070  
0.5530643925061729 0.5550369029959378 0.8252945676253551  
0.5015957078914393 0.5755023996440558 0.8326014321958991  
0.5243392879016812 0.6027678660824241 0.8320404170839304  
0.5555222024882610 0.5903780937847543 0.8272417516067850  
0.4243912279514595 0.5012656642227185 0.8251576176591744  
0.3963363693990882 0.5239814635745190 0.8254528594328895

0.4090332081250411 0.5546291411230490 0.8303082098407929  
0.5557684273212428 0.4482235198766002 0.8314706819308276  
0.6042357503235047 0.4748124790951371 0.8250578525940245  
0.4448298234849436 0.5506324398145812 0.8316940544373678  
0.4669138879818457 0.5774570054226567 0.8348936774908229  
0.4213207027775920 0.4665412752052316 0.8224591951379038  
0.5336882434183304 0.4213983668013881 0.8345783525559585  
0.5793025840727756 0.5323216209828033 0.8224750851432281  
0.4532028971425032 0.6111565710378597 0.8408495730260185  
0.4385866683832676 0.6305171905181873 0.8194255318957444  
0.4277089587806771 0.6626532106215517 0.8251926796723645  
0.4304128963042592 0.6757903983933558 0.8528141836744407  
0.4438918458753320 0.6560000182805781 0.8745323505818687  
0.4556018957580699 0.6243730321123103 0.8685483445823815  
0.6125747806246451 0.5466135165849877 0.8162763974736943  
0.6390162675483805 0.5443409388449981 0.8356704095484956  
0.6700536543048988 0.5572887273122672 0.8289142407738094  
0.6756572592435551 0.5725499788859694 0.8023862644987978  
0.6493436708434493 0.5747872491076710 0.7829544772468952  
0.6182315478295342 0.5624310133063019 0.7899590957363474  
0.5473703865758655 0.3876865150521023 0.8404167974037300  
0.5446426633056222 0.3742318053597040 0.8680021373870787  
0.55625369425238650 0.3425502405455663 0.8738610758247739  
0.5699656596990442 0.3229582767745732 0.8521202865681599  
0.5730187889297496 0.3363514150754029 0.8246173196034098  
0.5622174999656986 0.3685334000795530 0.8189776099090241  
0.3880245549829349 0.4521204423403230 0.8165414917160065  
0.3819851330523494 0.4366378360155111 0.7901337060031806  
0.3509009139846720 0.4239181260418051 0.7835159807330538  
0.3250704707428902 0.4254552229502100 0.8034627654613615  
0.3310555092457151 0.4403711458667879 0.8300803917963154  
0.3620397534395098 0.4537117065853016 0.8364319201009630  
0.1806652651082006 0.3533701123668486 0.8227129113912925  
0.7086380302159849 0.5861019462137613 0.7934600147177215  
0.7573312777028001 0.6165401190172306 0.8148294891627103  
0.7712570219841771 0.6249552762971534 0.8413887267616542  
0.8014742003918238 0.6414378020891369 0.8427176497095167  
0.8182781954578049 0.6497430107104260 0.8176167507519136  
0.8043897543375053 0.6413966064709669 0.7912750237508264  
0.7740822613420217 0.6249319631737955 0.7895811130120809  
0.5813474034174664 0.2889132009314011 0.8605183066644339  
0.5875363079921431 0.2313098433373309 0.8418728441171361  
0.5765072015802518 0.2104296988078150 0.8197881187251453  
0.5824506042236941 0.1765137366624036 0.8211040916837147  
0.6048968298586483 0.2177324581921984 0.8651286841880093  
0.6107060215402431 0.1836931788793521 0.8660020712094020  
0.599545485771439 0.1628613090934727 0.8442431634010643  
0.2918447001734510 0.4120491508214000 0.7952286892958397  
0.2433895056181093 0.3826313694417143 0.8179056480775846  
0.2187865724856716 0.3898389270088169 0.7976953071560120  
0.4537962959532238 0.6248936826832512 0.1689367214920636  
0.4021066743700624 0.5977230065694895 0.2020368156045314  
0.4843672761135194 0.3730740343957103 0.1768713126940557  
0.3727613853233647 0.5207363836670051 0.1651062613023885  
0.3801749775064006 0.4554291091400327 0.1742773680816335  
0.5186622961430357 0.6327670566166252 0.1793744573661256  
0.6231885369752341 0.5505299362836011 0.1765973929066950  
0.6310097671144598 0.4852725961785146 0.1676530958117175  
0.5693823411470232 0.6238539575247511 0.1451834690296756  
0.6062264631918305 0.6705496127542283 0.1571865060532455  
0.4755226623886825 0.4997521282121808 0.1720135167324395  
0.6265603509411302 0.6265462530390050 0.2392369404457744  
0.5898986009484638 0.5792040076301458 0.2268322049576589  
0.5960103516729205 0.4034943492310345 0.2021522396261779  
0.6453395034259922 0.3691343786653039 0.1936601104146399  
0.5280325798628959 0.5060385303821793 0.1722171601219379  
0.6554912040134317 0.4109034805032956 0.1094839789826914  
0.6063260599275578 0.4468947750310683 0.1185847026848167  
0.4130418555826627 0.4248273816428595 0.2250934606595285  
0.3763125702932584 0.3769852251580256 0.2358542332052729  
0.3534853701004879 0.5976300483796266 0.1045657121913396  
0.3973546487944558 0.3362792763949819 0.1526715855386127  
0.4342091333645101 0.3834520463202000 0.1422815487250251  
0.4033561446691769 0.5630918139195695 0.1150377536695221  
0.1764960128817058 0.6954257439506730 0.1531781628106943  
0.2602718196621219 0.2123560612013817 0.1703656639266712  
0.6973794344350538 0.3653116462748016 0.1854674978707345

0.7329480932458862 0.3343358205836992 0.2108927140876252  
0.7795864766577487 0.2946897815771192 0.2128077645465721  
0.8027818520558698 0.2709149694422759 0.1676430798276128  
0.7783894188766211 0.2877922014921143 0.1208802462022945  
0.7315665092737423 0.3275485630373408 0.1190195499406969  
0.3447468055952379 0.3270597269054815 0.1619127060494787  
0.2984639384751149 0.3058612325684012 0.1406957940256477  
0.2594602780400829 0.2590074268040412 0.1353209498510158  
0.3399176049837708 0.2601376340066558 0.2159717547846865  
0.3009338451006964 0.2133146423715980 0.2105141444982912  
0.2995992183882917 0.6291921937208695 0.1796543581972600  
0.2734956069001133 0.6794193713235195 0.1168426575062617  
0.2177724886162852 0.7050508173896652 0.1143895888319750  
0.2481264642509149 0.6353435937951948 0.1978556044188528  
0.1922730956853961 0.6603169904166030 0.1950828826847725  
0.6594065246672111 0.6789335268185863 0.1672476238144170  
0.6629584760004481 0.7440519873815982 0.2230045808932019  
0.7020653904596005 0.7909794880883151 0.2194406168108067  
0.7060224385006884 0.7009746808634225 0.1472442167200602  
0.7451199051830905 0.7479923688115949 0.1437250220426361  
0.7435948187656150 0.7933522752642862 0.1799961697074046  
0.5493542346197087 0.3808923761962808 0.1674700006939936  
0.3516262547022530 0.6300694091730885 0.1922026565025689  
0.4314029111130442 0.6124003818379427 0.2809051063379416  
0.3900260590941782 0.5825333734557206 0.3142600715535355  
0.5070473130626174 0.3699337098975086 0.2880370142656274  
0.3702605001464530 0.4948781647839697 0.2792271039736344  
0.3896002155346892 0.4319466006851822 0.2873367880359614  
0.4938454422101978 0.6319275477737673 0.2901817007636279  
0.6113651221710467 0.5699621122896401 0.2884873412363542  
0.6307906092670468 0.5071589577050803 0.2797969812730901  
0.5439770036377762 0.6318230317676512 0.2558553191163667  
0.5737820015850780 0.6840720942327143 0.2657580712483567  
0.4752635499843364 0.4928498897560468 0.2846658928044237  
0.6029884012884916 0.6466255221257831 0.3481450043841731  
0.5746853403835462 0.5933281531021325 0.3374601877067440  
0.6096413467150816 0.4178422145402433 0.3131871601748946  
0.6638136835198032 0.3917097773198371 0.3040192207693060  
0.52574567666692221 0.5091040685401506 0.2845166146493011  
0.6684899217153392 0.4396697618228927 0.2219255795764989  
0.6147200252704023 0.4674685999691304 0.2318383404666995  
0.4255469064240244 0.4082527009081339 0.3361029714498163  
0.3961062712969223 0.3553563104620510 0.3458726738259793  
0.3338848364402197 0.5638213413790010 0.2211951112266827  
0.4266253515025413 0.3183033890199705 0.2637039912491899  
0.4572535266879678 0.3702156794654931 0.2546248292698007  
0.3876359386196684 0.5361661723429518 0.2314104990588428  
0.1557011694760857 0.6582101553646970 0.2713800200039674  
0.2996909746873510 0.1798651025904066 0.2924177868640548  
0.7177124435131641 0.4033409033570730 0.2960034786815114  
0.7544849363770078 0.3693820234452158 0.3209235003929963  
0.809300645359536 0.3418797954297897 0.3219223484951387  
0.8417826866181948 0.3351352810814516 0.2768028306457088  
0.8185993559514088 0.3567718056472688 0.2310186215738294  
0.7638278839051972 0.3842128989981591 0.2300881636649530  
0.3717580763372531 0.3018513249239170 0.2716234925709909  
0.3161308517126306 0.2805463129832486 0.2650069985754917  
0.2809809606949590 0.2300867632179858 0.2657914057086212  
0.3884428108703732 0.2314866029363994 0.3178171213045374  
0.3537364165453264 0.1809519202897576 0.3182307606109526  
0.2804590461315620 0.5921458249806079 0.2944011895848992  
0.2591013253345011 0.6619716239731230 0.2485331484880920  
0.2028803135753431 0.6863767734919625 0.2469944445805171  
0.2223216119820989 0.5815363506751269 0.3000310848417094  
0.1657683219191014 0.6054583527918254 0.2978866147321182  
0.6288997245054454 0.7012370380684467 0.2752600119121289  
0.6083295011484333 0.7716226631092329 0.3199550215577800  
0.6425274434948919 0.8224691329257672 0.32212405272850007  
0.6853367348032705 0.7225653358586177 0.2723712921760388  
0.7199229755221355 0.7733443836244112 0.2748803623475009  
0.6985811569114055 0.8237292970479689 0.2997557336596176  
0.5694291291313135 0.3896059626311167 0.2788873397689333  
0.3356592813206124 0.6084340031868456 0.3047408670209672  
0.4114308109179732 0.5983641709340352 0.3879824622977973  
0.3756402277787666 0.5630350419342314 0.4211414613022269  
0.5284524732927449 0.3728471439694120 0.3970500477698389  
0.3717996229246222 0.4717745291545646 0.3878750543438687

0.4020077063053645 0.4133395372719590 0.3960551707525778  
0.4694636884013818 0.6285732727622947 0.3971597620695584  
0.5960135777048713 0.5880964567827140 0.3961945009393550  
0.6262681836305785 0.5296760918764132 0.3880664629898383  
0.5182477506723040 0.6374536309857974 0.3636611765635472  
0.5391431721802562 0.6938820743261471 0.3732443159803123  
0.4755270400631973 0.4884199993159219 0.3924174055664481  
0.5763877541398663 0.6617014216640366 0.4548426432670745  
0.5569182980960702 0.6045012388297452 0.4445571904211666  
0.6217788088975317 0.4384882346214404 0.4220439325907078  
0.6795990553795908 0.4221696778899918 0.4125593136720084  
0.5225555415573289 0.5129587534182632 0.3926841907110241  
0.6748514780115287 0.4691087122032796 0.3300304000396381  
0.6172049066003049 0.4871959101760874 0.3402937885333024  
0.4411458582416961 0.3962168915158236 0.4441449657734172  
0.4216273177490791 0.3388642058651259 0.4537217115963372  
0.3234538733268091 0.5296679305403690 0.3294146118492352  
0.4586542323535834 0.3080449906373599 0.3716543945120880  
0.4797264489380297 0.3645980468204308 0.3628219943746639  
0.3816241824698977 0.5134178384230950 0.3398711045842371  
0.1302274948408620 0.5868291759755769 0.3790423153989015  
0.3592133325709088 0.1484252771180388 0.4014656607125046  
0.7306050426495583 0.4437485956784032 0.4036611076592356  
0.7728425670535644 0.4184937671902741 0.4292049019942665  
0.8315776960659161 0.4009287951384318 0.4306253019057003  
0.8644132175670831 0.3973683804513905 0.3854151608138485  
0.8374653430002874 0.4119408525601747 0.3390942458047854  
0.7787130034833502 0.4292790050860035 0.3377251171294959  
0.4069043361856866 0.2815722756874415 0.3799251905184525  
0.3578033869339448 0.2497382871320075 0.3721549673938011  
0.3324047754676542 0.1937997958622835 0.3734639307194718  
0.4362572601040324 0.2160158583381200 0.4273562168463234  
0.4115244795773862 0.1599641526864798 0.4280369404051136  
0.2663920190964723 0.5497442285048936 0.4024186813576131  
0.2301784195031889 0.6106895506848006 0.3539994476582580  
0.1701346522216483 0.6226534075640939 0.3525276148567774  
0.2118903606105887 0.5278731677602556 0.4098861247953893  
0.1515459796441290 0.5392352527904025 0.4077768426178707  
0.5899607321548720 0.7209529911530336 0.3815284257241322  
0.5588788323435411 0.7848142817305633 0.4294281149274818  
0.5820391359085454 0.8415348305807118 0.4309884865025619  
0.6391123525133342 0.7539976416696292 0.3749055644122781  
0.6629211703146553 0.8106148724884188 0.3770647238178635  
0.6343956020188333 0.8548601520650425 0.4051020261480498  
0.5865879269678714 0.4030223465678426 0.3882771624557783  
0.3172338824887951 0.5774997882421998 0.4114510202434792  
0.3963029867471566 0.5816912932576969 0.4951782037164492  
0.3676505639083533 0.5407322681932097 0.5287146879363173  
0.5513913162659736 0.3802744287654425 0.5040832652274891  
0.3796814175894267 0.4501187252832039 0.4954975394877191  
0.4196389427951475 0.3978577362033207 0.5034508889504902  
0.4480418662468646 0.6216926257157617 0.5046086606526841  
0.5796934692647520 0.6040939772684732 0.5047439518825153  
0.6197211624072234 0.5519411236692185 0.4963352454039879  
0.4953310066961586 0.6390817001979918 0.4713381820209758  
0.5066609812816267 0.6982090755236433 0.4807404441501047  
0.4789505818444479 0.4845688088742952 0.4997672857252510  
0.5474067916710961 0.6730438456588910 0.5629510926574761  
0.5377301000756266 0.6133713483630266 0.5528067596423255  
0.6316972969537702 0.4612020918672427 0.5291315641271518  
0.6915132214825593 0.4559669869417869 0.5193780945888512  
0.5204708520394588 0.5173766578168859 0.5003069613235492  
0.6777982154924146 0.5023808078852153 0.4373706566538142  
0.6178368601909693 0.5093879868647659 0.4479381087490460  
0.4609472570871495 0.3877532578442296 0.5512086791383719  
0.4514803305259209 0.3278968003976436 0.5606374301700778  
0.3214371906010007 0.4984499858906918 0.4373487852521630  
0.4936738311302238 0.3040787051024661 0.4786940479288856  
0.5047857505838483 0.3634185343221271 0.4700040790583727  
0.3816002149639072 0.4925649562436717 0.4475104679709838  
0.1216399506806247 0.5253157888771217 0.4874299123952005  
0.4259849670974377 0.1288022446390609 0.5099970082223650  
0.7377331125115654 0.4868241288527271 0.5106021823045664  
0.7843866831642391 0.4681675238403743 0.5353442991991580  
0.8453994817062943 0.4619108764569965 0.5358965129781421  
0.8776451963635773 0.4663693272166691 0.4904340896743861  
0.8477925466767509 0.4776728769882558 0.4447765233759984



0.7868322678274291 0.4838417662192251 0.4442801962515477  
0.4475392584044173 0.2683873577266671 0.4867631372250358  
0.4043186138224849 0.2276730554753572 0.4804384342181157  
0.3901671312937364 0.1679279030794195 0.4825516929527344  
0.4893790795529344 0.2101401416311043 0.5339145347119344  
0.4758542226714652 0.1503967090759313 0.5353887543511990  
0.2619727008754127 0.5100151939398698 0.5108991759864651  
0.2167266013246477 0.5650415492476052 0.4632758517927084  
0.1555148065618215 0.5675681352894929 0.4617565448048511  
0.2114316560433672 0.4789314833001821 0.5174308943686922  
0.1500318004126719 0.4807872416784745 0.5152508112674272  
0.5523576065764754 0.7331682690171768 0.4894518764993107  
0.5122333087742752 0.7918184986635197 0.5375046755084049  
0.5271663246383715 0.8511993098414349 0.5394184553452893  
0.5959026502680507 0.7730636722217995 0.4827276469257744  
0.6114783446383595 0.8324423859294000 0.4852171274433493  
0.5771260877241378 0.8719781770259833 0.5136523727875614  
0.6031855180979973 0.4204139089124374 0.4954313396432289  
0.3076061835088855 0.5449282829904903 0.5192692066905142  
0.3838528500357876 0.5631534165886204 0.6029953987207375  
0.3625877631325694 0.5174619650553522 0.6365830061333471  
0.5710370379222783 0.3913424991887117 0.6110362839778524  
0.3900125295501366 0.4306263977332154 0.6031258767654348  
0.4384697352295000 0.3860981010933551 0.6111293424505935  
0.4280824519550980 0.6113745776779853 0.6123107070073029  
0.5607570234500264 0.6165685411843058 0.6124053735152098  
0.6091897224371982 0.5722149996034087 0.6036876972393329  
0.4717295825126631 0.6367960720167823 0.5790496290834560  
0.4729542758385942 0.6969214249875083 0.5887796616512005  
0.4817429324780421 0.4818458915230681 0.6072366620759847  
0.5172505678629571 0.6783492643347009 0.6709150921718522  
0.5177999591019836 0.6179738819779218 0.6604231328033104  
0.6368098102923661 0.4837813402042084 0.6353090336824332  
0.6965702549760610 0.4893156663745767 0.6255282779762131  
0.5174621178043686 0.5209186496095939 0.6071109129179100  
0.6747231759957429 0.5349930101613073 0.5445287090247849  
0.6145345530743505 0.5310977039330469 0.5551391416955901  
0.4817308120265599 0.3835751529676552 0.6592826586938797  
0.4826480763632750 0.3230047633448608 0.6688393432744890  
0.3242272732848001 0.4685215909006447 0.5449906201115318  
0.5265249914874736 0.3063173256051272 0.5862510350012514  
0.5273802817258306 0.3666200788594541 0.5774196848993101  
0.3845265146951409 0.4733183125402464 0.5549972744548750  
0.1243866381390106 0.4514482128088041 0.5956302109188576  
0.4873972307162346 0.1224361529990660 0.6173445508581358  
0.7366565484429132 0.5287714175216830 0.6173564896510109  
0.7856307406686798 0.5203143470241161 0.6421671308705473  
0.8467917160259901 0.5250328483927661 0.6428383079019993  
0.8779093739294151 0.5342323623107001 0.5973293540342776  
0.8467248252059871 0.5387861301465240 0.5514458903566015  
0.7856641378430824 0.5338016204310022 0.5508116769749345  
0.4876518840572254 0.2636879412195366 0.5947118327614610  
0.4517545311346833 0.2170434271137241 0.5874870155980633  
0.4467179384213684 0.1558454914465320 0.5892785001085062  
0.537378988736115 0.2122860012754385 0.6422501837705831  
0.5329746908357849 0.1511985736320046 0.6434431222490693  
0.2646088919435809 0.4674838592982697 0.6186024082447905  
0.2080633348803574 0.5113102496833526 0.5709205585592262  
0.1478433156988957 0.5000266669251063 0.5696227771340433  
0.2223331024080224 0.4267621383812842 0.6257055752138718  
0.1621050345547784 0.4147724955935541 0.6237245102656451  
0.5122480427838667 0.7388422238103863 0.5976917077943420  
0.4639685068389764 0.7900447565379602 0.6468335126335522  
0.4692228140037139 0.8510317857206837 0.6487536671235448  
0.5478118779737888 0.7852211759566375 0.5900212692107052  
0.5537886411194864 0.8462936114373870 0.5926270458775836  
0.5144467628094360 0.8796721410935724 0.6220933440193648  
0.6152338300551616 0.4395945274217086 0.6018747968866104  
0.3026788487047916 0.5109783670969436 0.6273142679506973  
0.3759173046126002 0.5414034552309755 0.7113959946366208  
0.3628447018850560 0.4925695190244644 0.7449746125865229  
0.5895984588851618 0.4039847362020672 0.7194772614732228  
0.4044911849297130 0.4119209795702269 0.7118982821435683  
0.4597950329733529 0.3762359171142112 0.7200677904621960  
0.4112694267015154 0.5964253226925922 0.7208775376705140  
0.5411359362523691 0.6241867121804541 0.7205742410238740  
0.5963666052751658 0.5886092531331502 0.7117784938064068

0.4500142510899713 0.6283904809039037 0.6869849476577645  
0.4401498129507795 0.6878195615269387 0.6963364113753541  
0.4863162151192059 0.4778665994602176 0.7156379283081801  
0.4862901401946375 0.6782133644296242 0.7788409410687174  
0.4980951862261700 0.6188965576408252 0.7687303866297792  
0.6383759318807750 0.5068352545903415 0.7436800828742056  
0.6963180389632845 0.5222259546002905 0.7337091837803115  
0.5145537219017147 0.5226218578577081 0.7154901520145182  
0.6670689076695918 0.5622616540074687 0.6522223639198266  
0.6083982911519576 0.5481680499283600 0.6629090961304449  
0.5033866131719610 0.3808421406577054 0.7678915119313188  
0.5156961897480278 0.3215091804666192 0.7774109167378154  
0.3333302031302474 0.4386491074030193 0.6529933417580087  
0.5607563784561215 0.3130848773462613 0.6943466821751964  
0.5503696129548683 0.3725415681804041 0.6855720527941878  
0.3919632238527977 0.4533581145377119 0.6631848284227233  
0.1391577918611826 0.3878080830453390 0.7022268894176713  
0.5628138846030318 0.1260004356987378 0.7257162222986575  
0.7291909973553384 0.5659947747072379 0.7257394586131902  
0.7809580615429316 0.5602294710404692 0.7490908930545915  
0.8401530048699246 0.5765067452274043 0.7495460826425007  
0.8667782102018425 0.5983538014036537 0.7051670597056372  
0.8332332865835729 0.6036476770208125 0.6606269205120036  
0.7741380213469801 0.5873506461356288 0.6602225888620580  
0.5308580737283366 0.2637926588568107 0.7036046846019030  
0.5066461589715726 0.2102452411136727 0.6962289929651757  
0.5154672090401489 0.1494707943957003 0.6979448468108042  
0.5916019713915620 0.2247529859895885 0.7505171227390591  
0.6010075622368418 0.1641907125702209 0.7516172634048768  
0.2741900013493030 0.4281953649342823 0.7267705021535226  
0.2110454913563463 0.4626230494864285 0.6803964896172957  
0.1537049418916334 0.4410376940453482 0.6782624232295020  
0.2402046432174077 0.3785463496492052 0.7311379247958709  
0.1828259440545900 0.3565752790676874 0.7287262283070369  
0.4704860504159489 0.7369489723116115 0.7055386961661065  
0.4100165406185988 0.7755592655039519 0.7524986281347308  
0.4013785003840925 0.8361999716963413 0.7548981661227836  
0.4964894666457078 0.7905836210101835 0.7001647360412844  
0.4883628839654575 0.8514153766777033 0.7030933967991136  
0.4406588106580168 0.8746465627041998 0.7305402877929229  
0.6248509127343503 0.4590665536472171 0.7100764931651483  
0.3048703724418750 0.4763395034676884 0.7355052803367983  
0.3704831519866782 0.5173773488340747 0.8226124769192336  
0.3662106957245903 0.4656220692047452 0.8570538711076648  
0.6048816550610984 0.4209187134868795 0.8317182946436473  
0.4221871196905099 0.3946255929323336 0.8252572989047352  
0.4833263652430950 0.3703522405351045 0.8343604328052340  
0.3956575807181877 0.5778283811068347 0.8323691609658759  
0.5173254534289902 0.6284916768988638 0.8348678343006699  
0.5784526755406871 0.6042486717195977 0.8256446637001864  
0.4361764216570684 0.6205069467500982 0.7978692980554901  
0.4168925631822453 0.6772492535556442 0.8078966347210348  
0.4896695765006683 0.4751542500178587 0.8281730689544291  
0.4450320994969487 0.6660986204910133 0.8961364373547599  
0.4666562578677843 0.6094517101440510 0.8855073720384269  
0.6351573875277045 0.5321783841879327 0.856228853975689  
0.6902350484357616 0.5543718523858875 0.8442745358627604  
0.5109546018815030 0.5237146704989228 0.8283048289733125  
0.6537270433856120 0.5862517694445236 0.7621933988455630  
0.5979725227581838 0.5643925067043116 0.7746079471613306  
0.5333783944267380 0.3889994183952246 0.8849544357510960  
0.5548441174608134 0.3322182300369140 0.8953656251863344  
0.3462309310194857 0.4127728049947775 0.7626728437498546  
0.5840244669828860 0.3219348644127036 0.8073014960538044  
0.5648549606994256 0.3787473903745341 0.7975130215673494  
0.4019308348209235 0.4352391329096035 0.7744300863657712  
0.1562496659367116 0.3420233019051001 0.8245155865375909  
0.6040531833974353 0.1362523264210937 0.8453019119273437  
0.7148288377311092 0.6005063016778479 0.8345776606464124  
0.7582680799550344 0.6184356947177087 0.8611042770957854  
0.8119451867534757 0.647783535345248 0.8635048711761016  
0.8419597156655337 0.6626765781672329 0.8186276752106759  
0.8171926032034036 0.6477848841358306 0.7714853562051541  
0.7633493068319713 0.6186172699220075 0.7690099307357988  
0.5703118597988179 0.2721350170850498 0.8201279051385447  
0.5632377679815685 0.2210519548041742 0.8016169609477750  
0.5734186123885862 0.1606839023975996 0.8038828202874032

0.6132600690955213 0.2338112844318904 0.8822795134081285  
0.6241604693298191 0.1734005518611640 0.8841850390093283  
0.2887820698487091 0.3935604357374068 0.8353816236880907  
0.2240521782593821 0.4066793599031697 0.7801667731726349  
0.1686937974960416 0.3809625261770516 0.7845256974665366  
0.2555332390977704 0.3551768220337833 0.8562537339315576  
0.2001623103895924 0.3293979853690751 0.8604929961169685  
0.4309912171330171 0.7271115795038335 0.8213647096166490  
0.3864728684329586 0.7645653208419837 0.8831100584912096  
0.3758928197073325 0.8250015636070643 0.8856255560489988  
0.4392011182739972 0.7785328004149334 0.8039063775429270  
0.4293538916630494 0.8389190280322112 0.8067863676694850  
0.3974753911023024 0.8627559114909199 0.8477677824080867  
0.6300706062279803 0.4813647003315253 0.8220573670140656  
0.3111286790698364 0.4426384818109868 0.8457553517745021  
0.2955770298577358 0.6402748732713626 0.1603260000004617  
0.6597980893428612 0.6924858697189334 0.1855727401240773  
0.5076995701365116 0.4529312716312902 0.1718662829593673  
0.4504001662726438 0.4968239256454131 0.1715434919308447  
0.5531511210253411 0.5090376287971607 0.1722055208896154  
0.4959097027320317 0.5530128171062774 0.1718670719018293  
0.7022827724589871 0.3556943328759261 0.1656878153262210  
0.3438870773178037 0.3129781640428699 0.1799235138780418  
0.2760693618823462 0.6056987937681214 0.2762524742069110  
0.6256330347059375 0.7145904158015084 0.2936869007820870  
0.5153874741626489 0.4527996761750526 0.2843057005258330  
0.4510684375789791 0.4854487137891372 0.2843753320435904  
0.5499365839431459 0.5165118973856945 0.2844424989758548  
0.4855780469489120 0.5491741785918512 0.2847924472607133  
0.7241289112200231 0.3938725170942524 0.2764281344326990  
0.3739018300752265 0.2883146770495858 0.2900553414806640  
0.2590200900162513 0.5610847640472177 0.3838449579039830  
0.5848624026441384 0.7332227888847974 0.4002405465199617  
0.5222818144109193 0.4558495168758133 0.3926076807926967  
0.4530452700837159 0.4768119541804481 0.3923501570627729  
0.5450211668765030 0.5245916686626053 0.3925707059587970  
0.4757905685248797 0.5456101216667518 0.3924785512332348  
0.7383215143237611 0.4346956193549354 0.3842775904371544  
0.4119929788868031 0.2687616578686953 0.3983531730472286  
0.2528625831631769 0.5198420036181888 0.4922548951009955  
0.5452932759850201 0.7445876080303916 0.5080891550224702  
0.5304618967558440 0.4608459308238423 0.4999942390695882  
0.4587983611578263 0.4692753537134399 0.4997072083606344  
0.5406090382561354 0.5326881616619098 0.5004009364254662  
0.4689295139360826 0.5411436141480497 0.5001747232672537  
0.7468029366152843 0.4796228608939319 0.4910681459102929  
0.4548624353006668 0.2569597150505409 0.5053276877914380  
0.2535142491056694 0.4754345569556455 0.6000988618583175  
0.5034677504466927 0.7488615655581223 0.6163742869589385  
0.5368081972786632 0.4672325543562593 0.6070454581860026  
0.4646217581945817 0.4632184919226877 0.6072124662021124  
0.5345857948550932 0.5395421203918591 0.6073175084786683  
0.4623703556638016 0.5355775874722820 0.6074606005917889  
0.7468178375838288 0.5236314732116030 0.5977488356104030  
0.4965481816579509 0.2535127893831519 0.6132953175554323  
0.2621556711558610 0.4337666916534951 0.7080894809627764  
0.4593709160093253 0.7447594019868053 0.7240755671276030  
0.5428462174273786 0.4728662749735727 0.7153846714669422  
0.4725268777595650 0.4566527892327940 0.7157663780887771  
0.5283391275193835 0.5438302284157513 0.7156725583519626  
0.4579957899360249 0.5276203061259184 0.7157851453716915  
0.7399455102807587 0.5636415945470971 0.7060075679489294  
0.5424632303187499 0.2557799364593308 0.7218313378473292  
0.2752022305330021 0.3969810830957891 0.8173047388401313  
0.4204129461892022 0.7336026432704008 0.8403991851450677  
0.5470112782775971 0.4808445288058521 0.8286400543851286  
0.4804873209716686 0.4515794067116688 0.8283844624841320  
0.5201423461228715 0.5472864149622495 0.8286129599662662  
0.4536023530239566 0.5180318913433229 0.8286536926921610  
0.7263288482351239 0.6004744318576699 0.8152278713148012  
0.5803949036769143 0.2653566755423735 0.8392801603752382  
0.6894803160961668 0.3607145133176251 0.1177983774590061  
0.3599702720579540 0.3140171499155173 0.2272815317012154  
0.3150246274711257 0.6442358723791920 0.1140924978874026  
0.6425348493809211 0.6901311510961220 0.2325613055806024  
0.7070944920908515 0.3884748739223636 0.2295138554708022  
0.3907702645011354 0.2906732818476269 0.3370869605370844

|                    |                    |                    |
|--------------------|--------------------|--------------------|
| 0.2942337731704087 | 0.6150892187698160 | 0.2301715597918485 |
| 0.6063402937952720 | 0.7118086713262106 | 0.3399906281604481 |
| 0.7219056648017976 | 0.4249235315913503 | 0.3377412205186203 |
| 0.4293951891324782 | 0.2743272641530118 | 0.4450662259297072 |
| 0.2743783983413625 | 0.5721556272759096 | 0.3372925951804896 |
| 0.5692380665556044 | 0.7260818151902158 | 0.4472414725589200 |
| 0.7321462360713177 | 0.4675271096795990 | 0.4445157064591881 |
| 0.4700844916475123 | 0.2659000755211802 | 0.5521794033898022 |
| 0.2656418053058236 | 0.5314230375323190 | 0.4452764984085374 |
| 0.5298495362659352 | 0.7353449968995793 | 0.5548734548016561 |
| 0.7344956949430071 | 0.5095801005110560 | 0.5511328265407799 |
| 0.5105502619152564 | 0.2647966173255369 | 0.6600983551599906 |
| 0.2633884979748656 | 0.4908735731162124 | 0.5534096190896529 |
| 0.4895835722788106 | 0.7369226899467276 | 0.6630711875487092 |
| 0.7301068255164055 | 0.5495584276661294 | 0.6589929598370750 |
| 0.5549703660085371 | 0.2700692128990501 | 0.7683746901444231 |
| 0.2697263935174689 | 0.4498884633655063 | 0.6612881477067357 |
| 0.4478454149682772 | 0.7300774725010482 | 0.7707054813084641 |
| 0.7184219516454773 | 0.5847264862467830 | 0.7683067289773194 |
| 0.5901602007288602 | 0.2832263476720455 | 0.8853675578406754 |
| 0.2807978573187545 | 0.4143065582503206 | 0.7705310061706857 |
| 0.4095346034177681 | 0.7151076123825892 | 0.8861091868335759 |

N-CENTERED MONOMER

|                      |                     |                     |
|----------------------|---------------------|---------------------|
| 1.0000000000000000   |                     |                     |
| 39.43803900000000034 | 0.0000000000000000  | 0.0000000000000000  |
| 0.0000000000000000   | 40.0849740000000025 | 0.0000000000000000  |
| 0.0000000000000000   | 0.0000000000000000  | 18.2582340000000016 |
| C                    | H                   | N                   |
| 72                   | 50                  | 8                   |
| O                    |                     | 4                   |
| Direct               |                     |                     |
| 0.1741121512254819   | 0.5914715349394526  | 0.5050388142100388  |
| 0.1911877210129885   | 0.5550880491533632  | 0.6302460798666618  |
| 0.1578014491854570   | 0.5652455230037546  | 0.6190261952450525  |
| 0.5523254805482469   | 0.7425589320845406  | 0.3854776439768315  |
| 0.5534097952501078   | 0.7797340489017996  | 0.3964052649771111  |
| 0.5330493038396116   | 0.7969215209883934  | 0.4470020081779580  |
| 0.5352187053197651   | 0.8315579891330939  | 0.4533685755015595  |
| 0.5756111460451330   | 0.7979734289738281  | 0.3516359739067098  |
| 0.5779357340559300   | 0.8325244843328242  | 0.3584072243956085  |
| 0.5578087200184397   | 0.8494168150152300  | 0.4093961714786605  |
| 0.5463342019395289   | 0.4033534171917689  | 0.4994953367615559  |
| 0.4551924411389654   | 0.4370232007810753  | 0.4954837226496313  |
| 0.4231398527942608   | 0.4836782787832988  | 0.5040324560251369  |
| 0.4007747528145429   | 0.4554833206228843  | 0.5025622577129220  |
| 0.4202213912679051   | 0.4271616125479514  | 0.4966759646801006  |
| 0.5768192390718219   | 0.5178564314336747  | 0.5096390030521801  |
| 0.5447581869431416   | 0.5641991071836011  | 0.4939322565923399  |
| 0.5794878617864238   | 0.5743687457124813  | 0.5002260238074039  |
| 0.5988797897537892   | 0.5463090316012662  | 0.5109139985507158  |
| 0.4365250060769562   | 0.5446676364917041  | 0.5033335048970158  |
| 0.4252093081939921   | 0.5792023801500602  | 0.4986483454121819  |
| 0.4536390137394953   | 0.5980411474275387  | 0.4908151869577533  |
| 0.5632889904664230   | 0.4567852373121861  | 0.5125192180017490  |
| 0.5177547440169389   | 0.4263876055782214  | 0.5003193293441883  |
| 0.5746770786703842   | 0.4222534911727910  | 0.5080031127115309  |
| 0.4821798242583819   | 0.5749037433296437  | 0.4926589496266251  |
| 0.5163541343147620   | 0.5852735973322297  | 0.4881520942670937  |
| 0.4138629402089051   | 0.5174775379822719  | 0.5073685179047338  |
| 0.4836659553206650   | 0.4158856690633224  | 0.4938359784195659  |
| 0.5860320936772034   | 0.4840674439120502  | 0.5166617667178296  |
| 0.5234206218041914   | 0.6215324495813875  | 0.4771568529670855  |
| 0.5352819786818331   | 0.6332606064898580  | 0.4094403221732782  |
| 0.5414088777801338   | 0.6670207410460627  | 0.3965227526975005  |
| 0.5358060439733994   | 0.6902051941257100  | 0.4529525335488198  |
| 0.5242690681125405   | 0.6787160250186310  | 0.5213605513198381  |
| 0.5181136042646538   | 0.6449749015622013  | 0.5331214468983623  |
| 0.6226101649924143   | 0.4765313393143757  | 0.5286805839561062  |
| 0.6332205838459869   | 0.4606264941971980  | 0.5932837589639206  |
| 0.6670824796584948   | 0.4527318600045162  | 0.6064175390478800  |
| 0.6916978394802507   | 0.4606098748503499  | 0.5535337093301518  |
| 0.6814717491594244   | 0.4766011187049860  | 0.4885853587176922  |
| 0.6475643605447099   | 0.4844650695032895  | 0.4765487029059299  |
| 0.4768078980153895   | 0.3795093706223593  | 0.4849935539644593  |
| 0.4829854374442055   | 0.3567951593376394  | 0.5420309931508099  |
| 0.4770084290751928   | 0.3228811123472464  | 0.5326986823876004  |
| 0.4647950395875008   | 0.3104471546838881  | 0.4656585932608396  |
| 0.4582254711367172   | 0.3328829128121242  | 0.4082630632319238  |
| 0.4641869549395420   | 0.3668379181183423  | 0.4187424111304404  |
| 0.3768197234600796   | 0.5248388799947861  | 0.5147714413225344  |
| 0.3554170006347407   | 0.5263785616096254  | 0.4534843686659146  |
| 0.3210897623368697   | 0.5336015190927307  | 0.4612911340067815  |
| 0.3070277385364761   | 0.5393643226391560  | 0.5309296750692921  |
| 0.3281214521086064   | 0.5376541656890758  | 0.5928326442427152  |
| 0.3625017991471996   | 0.5305794820905643  | 0.5839207461249000  |
| 0.1491631155942313   | 0.5834216498394013  | 0.5563657555458776  |
| 0.7427136005681028   | 0.4372883373155819  | 0.6186833956881722  |
| 0.7799644072528282   | 0.4314751527760109  | 0.6069341266287196  |
| 0.8001700544524913   | 0.4280074374773548  | 0.6697479505682395  |
| 0.8348461184580401   | 0.4220343106949151  | 0.6635009923274157  |
| 0.8497611522518850   | 0.4189930616090863  | 0.59433742287904304 |
| 0.8297709423810464   | 0.4218508147214244  | 0.5314931570740864  |
| 0.7950667355703155   | 0.4281340482006893  | 0.5376800374102464  |
| 0.4487355874755778   | 0.2571485082317482  | 0.4014449008054929  |
| 0.4489622372262227   | 0.2200750272375012  | 0.4138788219792721  |
| 0.4268242816677482   | 0.2007626230546089  | 0.3711937754385853  |
| 0.4257095194897692   | 0.1662283665462729  | 0.3795714401020168  |
| 0.4705432550847568   | 0.2040015760721473  | 0.4638590019123273  |
| 0.4695680600159676   | 0.1693903039308790  | 0.4718718226488231  |
| 0.4469983143457927   | 0.1504478047557906  | 0.4300837936130356  |

0.2518747642880108 0.5514333876113442 0.5950818749730779  
0.2163329336280914 0.5626041679419859 0.5784288594222066  
0.2075177197136338 0.5810797073141266 0.5159344734788668  
0.3990130055923836 0.5875840671781443 0.4999443376780796  
0.3787439014732106 0.5295308191446029 0.6323135666723411  
0.5448608034520602 0.3764912796533487 0.4923696928492031  
0.3733326831591218 0.4571286469183501 0.5055546111805467  
0.4114610924527352 0.4015172775056448 0.4942518313608120  
0.4553093170775595 0.6249261792107497 0.4842084450373770  
0.5880541040059667 0.6000869611068239 0.4984186830696661  
0.6260718707354705 0.5451481088385429 0.5195738937425736  
0.5394792991848251 0.6154458525524875 0.3650933863537467  
0.5503152214822774 0.6756755539370144 0.3434613032984267  
0.4771299281245946 0.4855397088245287 0.5015261372895824  
0.5200331018715871 0.6965033786499932 0.5658922834971477  
0.5091319356013680 0.6365763240530642 0.5865918337242106  
0.6143284287694178 0.4543602525671848 0.6347795315272632  
0.6748142571456079 0.4406185206069541 0.6570062310287361  
0.5230751596985546 0.5155070770752729 0.4991523167222365  
0.7003183448666942 0.4826753195466329 0.4466751616403115  
0.6401922151359355 0.4964387314601232 0.4252467804182413  
0.4924919614318097 0.3659305273115394 0.5944690429245978  
0.4819253815762468 0.3056929570731587 0.5780151783968110  
0.3049172644241355 0.5348697502853825 0.4126736725424651  
0.4487414257939151 0.3234749947498072 0.3563039636394694  
0.4593009531008808 0.3840246289346618 0.3735349155814863  
0.3658663887577714 0.5220696240923259 0.3989220512296318  
0.1230367547166000 0.5915483443485807 0.5478278630694822  
0.4461653415142906 0.1233852745910950 0.4365510244718643  
0.7413791477329171 0.4610164285189066 0.5198247707083683  
0.7879358111623892 0.4299723488344438 0.7231822837151256  
0.8503409717855211 0.4196141949344197 0.7127960909297938  
0.876896950013722 0.4140938571907177 0.5894172880990183  
0.8411585246503154 0.4188487908557603 0.4773995881514075  
0.7797586956966607 0.4292261270660749 0.4878000741128573  
0.4653531967772552 0.2627886932280398 0.5064821478892297  
0.4107145726951099 0.2135186374767877 0.3314727503311487  
0.4081898154451131 0.1514884327031058 0.3464405509487327  
0.4891315265587225 0.2181712755016656 0.4955777858836232  
0.4866490801312375 0.1571946346650638 0.5105620229163860  
0.2605346021480602 0.5490780260691873 0.4850138094723772  
0.2268393648920119 0.5885506953485973 0.4762647198884565  
0.1676441618973784 0.6061389093932984 0.4566308573209304  
0.1985434800715869 0.5413243273154724 0.6793123037018751  
0.1383943204107841 0.5590843103282835 0.6594771249287160  
0.5363740038372961 0.7382641069673821 0.4913074437644816  
0.5144714854853162 0.7836389393633313 0.4805462520201254  
0.5190403407234960 0.8446297576775432 0.4924841707107914  
0.5908083538985911 0.7843539228495801 0.3116174372931167  
0.5955107139978243 0.8463984985853952 0.3236679678664171  
0.5595615787142845 0.8764942725888203 0.4145448141128485  
0.6008532266858497 0.4138583492627307 0.5091861645272335  
0.3173949759220537 0.5418219861802247 0.6469166261748925  
0.2723161430892448 0.5471878046937541 0.5343997864571122  
0.5408672200579496 0.7247247567665194 0.4452012127574144  
0.5286560877959785 0.4587338470983603 0.5077368236129913  
0.4556373736985249 0.4712928651759467 0.4997537746997545  
0.5444610068065997 0.5299420368808851 0.4994923579226141  
0.4712024206642788 0.5426268928397927 0.4999120587573072  
0.7263135497318812 0.4531096721938727 0.5615866421969118  
0.4601162394238757 0.2758050793039917 0.4600161310778121  
0.7284873945548220 0.4285417979112902 0.6758460136086667  
0.4387624460342592 0.2694283019635949 0.3432250001894006  
0.2614536393493734 0.5464782425901198 0.6585614695865157  
0.5614225401862986 0.7295165385577843 0.3273899413991409

N-CENTERED DIMER

```

1.0000000000000000
40.3870999999999967      0.0000000000000000      0.0000000000000000
  0.0000000000000000      40.3914600000000021      0.0000000000000000
  0.0000000000000000      0.0000000000000000      23.2582340000000016
  C      H      N      O
  144    100    16      8
Direct
0.1795528866418027      0.5829462129667711      0.3703338232841665
0.1958398485088437      0.5345082638554278      0.4513987427944288
0.1627379889981889      0.5413389723262051      0.4392331175535288
0.5445587104691790      0.7440207165038660      0.3097695500590288
0.5442746061631518      0.7804492353386999      0.3231131182664971
0.5266498992156780      0.7944751771257604      0.3690759018691129
0.5264619758822286      0.8287562156839514      0.3769904639362829
0.5615959173346448      0.8013139310895130      0.2853436542631680
0.5617505801865345      0.8354525774750785      0.2938184069368471
0.5441020948991230      0.8492911205111776      0.3396341642934508
0.5437928887986934      0.4022320999039996      0.3803517386079402
0.4558881320577414      0.4379474918486094      0.3712529413118792
0.4250413362851705      0.4846983486477910      0.3730081714030176
0.4029054006702474      0.4569050289297403      0.3731901251548280
0.4216431790834097      0.4285412501612610      0.3714246276820443
0.5768205897072382      0.5150437126627467      0.3799757434399714
0.5461821854159752      0.5616442958119048      0.3703076165601522
0.5804010221202599      0.5710581729204083      0.3727425324736304
0.5989795065252342      0.5428103083355208      0.3792571399720673
0.4395413050676596      0.5448785864145278      0.3722643589799928
0.4296879169304111      0.5795545520840306      0.3696344020556521
0.4581651702566312      0.5973918889861157      0.3661187409201712
0.5622035916167148      0.4549143833691388      0.3836668711184629
0.5167742482429020      0.4260747415805782      0.3762899544167161
0.5721014209776306      0.4202172076849097      0.3852854404396456
0.4852192282663313      0.5734727061783466      0.3670306212874940
0.5188724064039285      0.5830473435144948      0.3659990395064612
0.4166175220357768      0.5184895465890684      0.3742250151591317
0.4832267966478501      0.4164576325847963      0.3721481349881020
0.5850929613005388      0.4813577901510636      0.3853399873105671
0.5260740291693909      0.6193143859108540      0.3619197514652895
0.5252256847766392      0.6358957985340323      0.3089813781596526
0.5300276156195567      0.6700291899919981      0.3049756117650977
0.5354533924392174      0.6885981426746766      0.3552056715842029
0.5369738641975491      0.6721561421465454      0.4084118432865436
0.5325276625396440      0.6380363735550453      0.4114725924472206
0.6209392377495235      0.4733520291051816      0.3935269973299840
0.6329032179538046      0.4634453150496195      0.4475278969915792
0.66631411120810337      0.4564324107233121      0.4567014191941989
0.6887383985149663      0.4590206421697015      0.4109059710920885
0.6770620448023212      0.4684356992354303      0.3564476165040910
0.6436708480016277      0.4755985773974279      0.3480301520596967
0.4758810778437240      0.3801540267357847      0.3694963253394829
0.4697506908951161      0.3618232114396785      0.4195923150303327
0.4645495632061556      0.3277843642725374      0.4172505650793945
0.4650631247692402      0.3110383629729248      0.3642691312740335
0.4702433653972476      0.3292346282132345      0.3135471279945883
0.4757292614138591      0.3632836757880640      0.3168239733238368
0.3805548256234320      0.5264037914845127      0.3782092511636115
0.3591100108599471      0.5211119334813381      0.3315957129113537
0.3253293467405223      0.5274086236568777      0.3364431776759444
0.3119599485083361      0.5390139017112614      0.3883931429947961
0.3330964670615135      0.5449188982270378      0.4350881997994013
0.3669247478507803      0.5387397245522374      0.4294595416068210
0.1545068207356456      0.5655459109836191      0.3986873433237796
0.7426030345830996      0.4527908865824549      0.4643411865379077
0.7780485297270001      0.4432009449989909      0.4541682412016448
0.7953714242053016      0.4288118985129522      0.5000980996869693
0.8282897055103015      0.4192103850278351      0.4934224338675517
0.8444918581222500      0.4243334304486519      0.4410653849568088
0.8276453189016810      0.4392028541498112      0.3953925005808049
0.7945685571898822      0.4484873350436093      0.4018081999648083
0.4550179703680500      0.2555245094486811      0.3197983404098922
0.4546366118489262      0.2191532455679472      0.3335917566407171
0.4378497252896995      0.1984187423417338      0.2948940814717121
0.4371961420816043      0.1642935305381204      0.3033924194542795
0.4712070803059624      0.2050054288309299      0.3806080759915557
0.4709154456482895      0.1707243408281033      0.3885799439684605
0.4538327114073936      0.1503238470108479      0.3502263805189653

```

0.2563960915800435 0.5432652175937821 0.4368416423919489  
0.2211270554821021 0.5514824744454963 0.4224462717081378  
0.2127167871230685 0.5758788953179655 0.3819497144438186  
0.1731480503285394 0.5483595577271744 0.6045637667858019  
0.1904213360673301 0.5059860456822820 0.6944128611694702  
0.1573690763373631 0.5145051060694940 0.6858042485304282  
0.5088415003779090 0.7471038542387474 0.5485698043620396  
0.5083149563221501 0.7835497574822844 0.5610073896757577  
0.4854730257733930 0.7979413294657656 0.5990670456143088  
0.4856575477152950 0.8320745575367774 0.6085497551180600  
0.5311907598374948 0.8038545277966086 0.5324694169397355  
0.5316389963899649 0.8378599011072497 0.5426548259648847  
0.5088671620530133 0.8520573574382913 0.5806438490997429  
0.5620819280000712 0.4134820642711257 0.6307718096635416  
0.4684946089887177 0.4294471429052005 0.6251884839429878  
0.4293046883890245 0.4694782087883649 0.6269099083274647  
0.4128713274846900 0.4380144446568908 0.6251841577639957  
0.4366557968275606 0.4137152217401001 0.6234971875877765  
0.5696982520246138 0.5310353298173837 0.6330076011173552  
0.5306989813272858 0.5709797557167755 0.6243537064213409  
0.5625335195155592 0.5867163306833032 0.6258992413859780  
0.5861661562553260 0.5624906270337424 0.6318471430555295  
0.4307975679004036 0.5315173565262312 0.6246441337565463  
0.4133693825583630 0.5630963878877943 0.6218635488736659  
0.4370790536142106 0.5869134646474132 0.6186242591739480  
0.5682175758004814 0.4689585118588196 0.6350812846463467  
0.5303923508076116 0.4306708607414357 0.6282447470853111  
0.5856860454287975 0.4373490201523134 0.6351134149504017  
0.4688121310362792 0.5697239775292343 0.6198209924281717  
0.4995788823780751 0.5863695097834450 0.6192688113265398  
0.4141462591867400 0.5007795688629866 0.6268229975739461  
0.4997094574873107 0.4140209026234319 0.6246835357043250  
0.5848177625922154 0.4997604546938799 0.6367146339543913  
0.4995796647237237 0.6231892202083685 0.6129845634907111  
0.4913703682564483 0.6380776826492230 0.5603219231799353  
0.4920776929485320 0.6723507950958431 0.5529725893326087  
0.5009143668510231 0.6927110835727409 0.5993198424733364  
0.5086177061820377 0.6782092902359262 0.6525125056187739  
0.5080420983571724 0.6439531985646862 0.6590979467691216  
0.6217841638230741 0.4990879991128669 0.6400436918318035  
0.6383074433053364 0.4912661655303493 0.6912851198462950  
0.6727310770231771 0.4885711680912724 0.6938226792216350  
0.6915933396786084 0.4933695688054260 0.6437215952616372  
0.6753199860876999 0.5020101883594095 0.5924370618505267  
0.6410326241090752 0.5049722639944846 0.5908581586861875  
0.4998646242366946 0.3771251560224506 0.6196492642505304  
0.4906984858121912 0.3568623493701800 0.6660078504758216  
0.4901837295255821 0.3225414156876020 0.6604395975526077  
0.4986264976522231 0.3075050090220038 0.6080415417332619  
0.5081856492287307 0.3273689318208270 0.5614876065771525  
0.5088588851838212 0.3617105547890504 0.5678416419066915  
0.3770915465753584 0.5014847936567206 0.6279534378834568  
0.3585980663362677 0.4993938106928565 0.5770399790497349  
0.3242326795473299 0.5020487435002419 0.5778032872125257  
0.3072518793536763 0.5066772375765539 0.6299486604944288  
0.3253961970882476 0.5077858638546561 0.6814820950943041  
0.3598399649254977 0.5053790413987793 0.6798185663588047  
0.1486376966231573 0.5358337256812302 0.6409141794507659  
0.7482064641493100 0.4883064401051923 0.6863530349311820  
0.7841927709667537 0.4854490744691922 0.6702009602088413  
0.8059067457590883 0.4742803102164023 0.7131662455509590  
0.8397463502950656 0.4717076158134611 0.7024485587447153  
0.8524928540787670 0.4806808416598894 0.6487552956133555  
0.8311403795273963 0.4921440402274158 0.6059154712502069  
0.7971746184939049 0.4944413428688487 0.6164436498773238  
0.4911456450967173 0.2525056524971105 0.5589569241772099  
0.4919637249354463 0.2162297346052791 0.5728598259138304  
0.4695056885103215 0.1952342900940479 0.5448246726472534  
0.4694125975808962 0.1613821426805756 0.5564842469356479  
0.5147326986814924 0.2026662580707605 0.6119706523873850  
0.5148754009237314 0.1686905712759605 0.6230092409440453  
0.4921028885598925 0.1480157619561706 0.5955321953259161  
0.2503320771563919 0.5089831451493457 0.6718971010017317  
0.2151936398158711 0.5182061572986343 0.6577442995933734  
0.2062672942580023 0.5394854180876891 0.6126248438327716  
0.4044168734237349 0.5887867308782025 0.3699124982384491  
0.3832091100606133 0.5433848472429199 0.4660677764673441



0.5411865732536989 0.3754652072286641 0.3793876780430493  
0.3761080155276880 0.4587284381221334 0.3745523884624117  
0.4129281770700039 0.4031195354164060 0.3709548206725153  
0.4608413302768084 0.6240976859566223 0.3631688655431042  
0.5891916672772703 0.5964147751499094 0.3702516516595304  
0.6257012640698334 0.5410220717237558 0.3831559350422939  
0.5203829209902825 0.6217927392732732 0.2698019555963708  
0.5294766807207385 0.6824280874693287 0.2634911378551800  
0.4776037333947962 0.4862666034411184 0.3724779837532641  
0.5409914563505318 0.6864612259712325 0.4476668025507385  
0.5335549663165779 0.6257430670975093 0.4532515596289077  
0.6156066539970952 0.4611869423335466 0.4834125023221028  
0.6750183337226887 0.4491217098923859 0.4991005491371706  
0.5243473917706706 0.5134406601029698 0.3744614923428939  
0.6943592345423270 0.4703748347230668 0.3204314902291437  
0.6350248730575739 0.4829472277416780 0.3054300506331478  
0.4693244414962071 0.3743739386214814 0.4611559311206204  
0.4606021289007153 0.3137848358182661 0.4568615678253587  
0.3090344750123262 0.5229999402686051 0.2996755891375587  
0.4700544753588701 0.3165962896489518 0.2722828204326874  
0.4803024535053120 0.3770883298713659 0.2772300985697930  
0.3690847203073666 0.5119159648800806 0.2909954767857173  
0.1285682219665987 0.5709846465775199 0.3894313867787905  
0.4536693496493950 0.1235306502918308 0.3565906887121683  
0.7342695276840874 0.4447962379317199 0.3792431549428454  
0.7825511057328348 0.4253102865904501 0.5409268415103413  
0.8414061403433594 0.4077968076497110 0.5293545041313230  
0.8703223784910271 0.4169293052285150 0.4359367290659055  
0.8403426233361639 0.4437773204569443 0.3547199558176285  
0.7821265040415226 0.4608902273232840 0.3660369605087679  
0.4627337976514183 0.2660572777844618 0.4053338933761605  
0.4256202817123821 0.2098124587797796 0.2580334130221512  
0.4238544690635614 0.1484512932196113 0.2732193771432619  
0.4851089499848668 0.2203903787051584 0.4108183469758973  
0.4843206097408463 0.1599565766205988 0.4248062443165954  
0.2663227652355170 0.5474370325369313 0.3515848213446235  
0.2321036542176011 0.5901932105792856 0.3605896591729346  
0.1732674557249812 0.6022405916109490 0.3393279247626641  
0.2025230267726064 0.5158884145071315 0.4833404599918539  
0.1432444925827747 0.5277192060487279 0.4615823646219220  
0.5368065949018134 0.7338634315070500 0.3954451675413193  
0.5123050458277443 0.7789301209404714 0.3984010301553625  
0.5122696742288364 0.8394104448643931 0.4123963424925548  
0.5746579080103378 0.7900386086697938 0.2492345406608590  
0.5755277971138618 0.8514063424939855 0.2644183307790367  
0.5439295518369305 0.8760822243104220 0.3459696745715792  
0.5973112850016294 0.4110820653772608 0.3891150696897501  
0.3230802920783150 0.5540445391896579 0.4755314386151771  
0.3866654082707082 0.5663445839829324 0.6224862281665989  
0.3737327464826194 0.5069135477962241 0.7200251357650475  
0.5656011264905803 0.3868217617174218 0.6295913054792334  
0.3861740376581529 0.4348942055559486 0.6247201749689654  
0.4328116618386872 0.3871509617640075 0.6213069699176772  
0.4336163126132150 0.6135571749942600 0.6161922188868467  
0.5665031701846889 0.6132364151251847 0.6228873012036090  
0.6127925123395487 0.5656938518823728 0.6348534776232558  
0.4843860079440686 0.6223953212057585 0.5240423896387628  
0.4859927356782347 0.6832546296883458 0.5115129187149653  
0.4810965395258106 0.4805051169834765 0.6277872190168189  
0.5153567492506436 0.6939334842629638 0.6889559473996453  
0.5141863132349335 0.6330693822686823 0.7007148071135914  
0.6238624246007061 0.4868479088774407 0.7302428928842911  
0.6851690749310514 0.4825780670262844 0.7339538651777917  
0.5180037258357266 0.5199519610752750 0.6279784191451910  
0.6897910871537057 0.5057404985096436 0.5533276680418593  
0.6288582719258262 0.5113784769168908 0.5504401723601025  
0.4839450841914252 0.3681821675723343 0.7069846293727465  
0.4829383381262897 0.3071762218162045 0.6970574063473096  
0.3102884988723406 0.5012168475478912 0.5375791352435032  
0.5149430650803054 0.3160165866050522 0.5206976499576063  
0.5165200313639495 0.3770124948745532 0.5314916555215952  
0.3713617725641497 0.4960242527595444 0.5360646196040660  
0.1227778271900946 0.5428567551432322 0.6345604641630377  
0.4921221246303096 0.1214703367774427 0.6043651801324667  
0.7353090926516000 0.4853797840297154 0.6007814916802502  
0.7954920639544844 0.4679593190780248 0.7550406293048009  
0.8563222231247745 0.4628392742020309 0.7361789509421874

0.8790453306447628 0.4789269232209664 0.6404183030366100  
0.8409362936287944 0.4994612324818836 0.5640571919636330  
0.7810788568036907 0.5038775316658417 0.5824515255411521  
0.4983018779041645 0.2609141355685619 0.6441048225499431  
0.4521103710615998 0.2058639537315142 0.5140474474135250  
0.4515304114567596 0.1453281513005898 0.5349731272213575  
0.5331618476922014 0.2185019173502937 0.6326423857037018  
0.5329645293416454 0.1583329712214778 0.6528992794382273  
0.2636131810731346 0.5158380340877954 0.5871439544509901  
0.2250486507919164 0.5498891999607844 0.5840281604845940  
0.1665652751139848 0.5653160343324817 0.5698440260877182  
0.1978774611401141 0.4899670822907019 0.7299050035322893  
0.1383196129619456 0.5047063416488261 0.7144663380374159  
0.5011867392057479 0.7396920095936335 0.6338993317375554  
0.4667284194478548 0.7826291473585452 0.6201029862958417  
0.4674711202826347 0.8431006834217479 0.6375176702600934  
0.5486121197340739 0.7925660442818546 0.5024472932942096  
0.5498037347642609 0.8533772266242905 0.5206964554466162  
0.5090995259593744 0.8787228229245697 0.5882774354088591  
0.6123384248473968 0.4341157834600475 0.6379411835076133  
0.3124594833186731 0.5106350006667825 0.7221721468674531  
0.2775761988851935 0.5452098395327474 0.3905456441254695  
0.5385085996252169 0.7233141180350353 0.3556901552627558  
0.5285273822451425 0.4579064906866513 0.3782578516935530  
0.4566589574631852 0.4720237800524134 0.3718256034231728  
0.5453193093270298 0.5276481679645176 0.3744361035353616  
0.4733372854757679 0.5417430809187745 0.3706058393590519  
0.7227705576704886 0.4514402172515533 0.4164033852195300  
0.4612165408106385 0.2764051969143149 0.3654069593979284  
0.2726969286221497 0.5111536863076993 0.6272949303944059  
0.5016057376839952 0.7276013588957264 0.5955079417315242  
0.5346713866905735 0.4643083396694342 0.6310802116520757  
0.4627833221246985 0.4630129779317945 0.6272185126652974  
0.5363003578804577 0.5374619248636244 0.6287596925995761  
0.4644327242828421 0.5361380558037265 0.6235276375012863  
0.7262060970387053 0.4893693459590006 0.6411988598230773  
0.4980263766921860 0.2725857351795588 0.6053307015180893  
0.7324109698512332 0.4607328441848621 0.5127535580631725  
0.4499401789963831 0.2653834559211315 0.2701933849765792  
0.2651653689951684 0.5351454981531369 0.4859636161274735  
0.5500571066828143 0.7339680036920621 0.2604354040885479  
0.7397400963416244 0.4897127260341234 0.7374658089376103  
0.4844555041903212 0.2629829336985463 0.5102259980351854  
0.2580251221422452 0.5001488800469293 0.7210679088008622  
0.5156340061991149 0.7360009086306500 0.5002896604887669

N-CENTERED TRIMER

```

1.000000000000000
39.6180019999999971    0.000000000000000    0.000000000000000
  0.000000000000000    40.8536920000000023    0.000000000000000
  0.000000000000000    0.000000000000000    28.1856720000000003
  C      H      N      O
  216    150    24    12
Direct
0.5225955588454354  0.3931686757142159  0.3005520483042070
0.4418399211824061  0.4448237548708620  0.2954912248028873
0.4204905904522644  0.4961253435564936  0.2996214023497222
0.3927643112076374  0.4735119468447412  0.2992068133035753
0.4057385471986433  0.4423897515074318  0.2963128499448139
0.5777835037177613  0.4963578614725297  0.3080541858466862
0.5568234960592485  0.5477876969349915  0.3030783112528432
0.5929310393411509  0.5499911148585532  0.3045167976920453
0.6056546664127386  0.5187878858977915  0.3079065318216760
0.4470181755455946  0.5516946810303038  0.3026691574551822
0.4439022524159193  0.5872337352735018  0.3025821491656966
0.4758633191031069  0.5992664523818845  0.3008045697620310
0.5514851364410694  0.4406771418065110  0.3044824486759856
0.5003606859078265  0.4215540005368175  0.2975975537463714
0.5544336636170910  0.4051039226473952  0.3053519912812533
0.4983094119450793  0.5709728543101061  0.3002331530331750
0.5338659311224755  0.5739387668903853  0.3002566311682689
0.4188706667078486  0.5304564163540110  0.3027219768904273
0.4648734514759317  0.4187066314555637  0.2949972557137969
0.5794306993037599  0.4619516429364616  0.3089459128198166
0.5482116707720512  0.6077732456665652  0.2976918657605054
0.5489972893969587  0.6248682937097455  0.2545558970748192
0.5603377571084969  0.6571139648706869  0.2516808471478565
0.5708280405741216  0.6734276914937862  0.2930488787530238
0.5707135806015337  0.6563778259138052  0.3363742615072164
0.5598239249883724  0.6239944916376299  0.3384333957728576
0.6135205924613818  0.4472868016054443  0.3167013426033348
0.6290464270756397  0.4499506887825255  0.3612589984503413
0.6606201122172525  0.4363870038458086  0.3706558798724150
0.6777660734294326  0.4196002176700205  0.3345765774013816
0.6625573943708463  0.4166707643419345  0.2896980537603761
0.6309152057112967  0.4302557547366362  0.2809878681184232
0.4505453881309208  0.3848164048872221  0.2938808480693720
0.4430648537808858  0.3682611790307926  0.3362085963522525
0.4325173903750321  0.3357863705695222  0.3358145779837956
0.4287761888430544  0.3189236047368147  0.2926368626803308
0.4349359711557901  0.3355772543878648  0.2498501576738161
0.4458859311011307  0.3680370709174905  0.2510319545018440
0.3844174508984770  0.5450780888937415  0.3068793690140608
0.3621053858770047  0.5456824347499973  0.2681924732208251
0.3297276970401921  0.5585709240189721  0.2728270961349785
0.3186505723416378  0.5710156996046610  0.3165657179655763
0.3407248769986903  0.5709001754875246  0.3554194545176086
0.3731868040252135  0.5581817007022303  0.3501445790334357
0.1671082650877589  0.6285727968800352  0.3270817981303996
0.7313746224184826  0.4059964640510576  0.3788764497126636
0.7631428280930858  0.3864426988091338  0.3725222020603197
0.7781074024507487  0.3730366240948520  0.4132396031537881
0.8075582020862760  0.3545320091292958  0.4096853947107281
0.8227234557428473  0.3495664893475173  0.3654880473781285
0.8083378018183980  0.3632816355529359  0.3248318388380341
0.7786619301985908  0.3815486041022738  0.3282701537843637
0.4112319901027063  0.2649996563812893  0.2584514231151365
0.4061568665190960  0.2296722161533050  0.2716155729569553
0.3873588967308119  0.2104880575350430  0.2398344797330753
0.3822849011725192  0.1772824081731279  0.2484621756206478
0.4201977138590813  0.2148562454866138  0.3119973556314087
0.4154205046152659  0.1814599358901141  0.3202409886288906
0.3963944250381973  0.1626380689667603  0.2886803499320680
0.2638264282976385  0.5851786688206982  0.3567871256732007
0.2304867218455975  0.6007550413908783  0.3455456399579627
0.2273965839478441  0.6270248233347078  0.3136885483169540
0.1958656242697925  0.6409503856021820  0.3047049787160467
0.2015719434809628  0.5888297829192282  0.3684551659201810
0.1700472023393587  0.6024866474455617  0.3589380144142691
0.5896211235325143  0.7257454306870791  0.2554768791925321
0.5967455335010495  0.7611235176851379  0.2661885285465070
0.5842143716121089  0.7777755140477698  0.3060381885598799
0.5906869993182937  0.8111579092835709  0.3117912544989224

```

0.6158643325678691 0.7784061543890355 0.2325323211582417  
0.6226815689065497 0.8115738438592864 0.2387512576333650  
0.6099867827624034 0.8280928369203187 0.2783738343871899  
0.5484537881203901 0.4069613531979338 0.4961464325523033  
0.4572957813686334 0.4388672766463045 0.4969422791605241  
0.4245005061416445 0.4841848781518296 0.4992492424391516  
0.4027726448987060 0.4561149942639174 0.4996775211290203  
0.4226661522937121 0.4286164309146921 0.4976141665084384  
0.5776628143689705 0.5197042709745844 0.5040661897145681  
0.5449194221381650 0.5649302840892395 0.4984066503830847  
0.5794233182159926 0.5752812445010625 0.5016158663295476  
0.5992459522340420 0.5478690891039247 0.5059056297033673  
0.4371676379754830 0.5442123290150512 0.4977837510915016  
0.4256531353505462 0.5780440063732674 0.4948651715231695  
0.4538851132959056 0.5968703197162132 0.4927712950885401  
0.5651144481943142 0.4596097180813732 0.5019390901876225  
0.5198659890758591 0.4293986482372269 0.4965361344019212  
0.5766464064254118 0.4257701522222752 0.4992079418616255  
0.4824478583276172 0.5743954470088961 0.4942245840092988  
0.5163364644775336 0.5851613421054705 0.4945343865026179  
0.4147832019539340 0.5172955251849257 0.4997227444929139  
0.4859759621953572 0.4185845300234662 0.4954373625511590  
0.5874389279292641 0.4865882493369689 0.5052597480456070  
0.5226030636878636 0.6211122791714422 0.4915024417954767  
0.5155818564172301 0.6385007018641891 0.4496730097358003  
0.5207021860505622 0.6721892954800958 0.4467054628871002  
0.5326830755521543 0.6893546950900700 0.4863103661416355  
0.5399184317311647 0.6723130416209275 0.5282453992393336  
0.5350722182647190 0.6385976888486928 0.5306017912838572  
0.6242463299543154 0.4796610562696333 0.5093897585325090  
0.6370836214958959 0.4616983384325929 0.5479297902168900  
0.6712362746479661 0.4538883231642705 0.5512076659564382  
0.6935072191265749 0.4637938774045303 0.5153897169125103  
0.6812815411563886 0.4823539255757742 0.4773229120913483  
0.6471252238999520 0.4902291962676609 0.4745235102441588  
0.4796499967999740 0.3825451264781345 0.4937647274057095  
0.4664382227778913 0.3660558101588738 0.5333047693427366  
0.4612956810613923 0.3323393585418285 0.5324979705688532  
0.4689310131829961 0.3141828550958358 0.4916723131109364  
0.4817241020362708 0.3303302248890422 0.4516374767400368  
0.4871297166257146 0.3640570435155949 0.4530872156444732  
0.3779005229081331 0.5244631842197484 0.5017894750195718  
0.3564030930649078 0.5166331875690774 0.4638581972945184  
0.3222340565686413 0.5246142061662257 0.4652461132329613  
0.3085976382747046 0.5403568824049874 0.5050610172101765  
0.3296117573244362 0.5479178795975695 0.5435163889742127  
0.3638310033025419 0.5401619127029557 0.5414914414151650  
0.1499980623932119 0.5784665188442830 0.5166317506938287  
0.7491724566139580 0.4545900354590173 0.5532859702770366  
0.7840811664407379 0.4415054545404786 0.5446817999616825  
0.8020051592867583 0.4295932829476860 0.5840047544871165  
0.8345753188588343 0.4172405394602581 0.5786096820315210  
0.8498565687307756 0.4170418510567727 0.5339051755487724  
0.8323677443272639 0.4292141769318689 0.4946416948577999  
0.7996104936570921 0.4412645666283926 0.4998904157868383  
0.4528929355657560 0.2602563672394482 0.4572521768950721  
0.4515793761436765 0.2243775368568668 0.4686338797008293  
0.4248444690562696 0.2058749911260224 0.4500093468511386  
0.4230542371451848 0.1723021733425444 0.4584282525925147  
0.4767285254768658 0.2086746266105558 0.4952708817060187  
0.4752697371752376 0.1748999558419819 0.5027415736807428  
0.4483909913421824 0.1566841034894396 0.4845557445046478  
0.2519313487694644 0.5464362652069714 0.5416278922950054  
0.2166863576350677 0.5578449184603582 0.5313759717504299  
0.2099255563823572 0.5852778524996561 0.5029562078139667  
0.1767056037032624 0.5956868380701159 0.4960447256240439  
0.1897712241290474 0.5409240347446778 0.5524664354089432  
0.1566018990772808 0.5509546203987250 0.544670362541322  
0.5496091669527428 0.7421561697300947 0.4496802008595482  
0.5500994604640425 0.7783811030283999 0.4586045081534799  
0.5236532309201195 0.7945813010050208 0.4819576180753774  
0.5245331184784672 0.8285360578202786 0.4876104237861594  
0.5774757882537930 0.7966036891839204 0.4413053571686077  
0.5786378209796665 0.8303958545680603 0.4479202504646221  
0.5520723203341483 0.8464762623012319 0.4708576462804533  
0.5638081176881463 0.4166001420310338 0.6994756441023431  
0.4683555500448764 0.4325103443196248 0.6967351473076993

0.4285473216788901 0.4722256579165524 0.6986483031005041  
0.4116747380032921 0.4411821966110852 0.6975593880213107  
0.4358289472989844 0.4170748839006485 0.6959048376080856  
0.5718147969987782 0.5327958023636686 0.7013521638055552  
0.5321199432148060 0.5725151012361408 0.6960195666133520  
0.5646903539978330 0.5878803552907612 0.6957983788685480  
0.5887526586108586 0.5637883144496548 0.6995069879154080  
0.4302085044738841 0.5335590534714206 0.6976761750815694  
0.4124494589500357 0.5648023570843014 0.6960709808272137  
0.4366129361873211 0.5883544398387826 0.6935118568210140  
0.5701704960657610 0.4714454751127886 0.7023521808912302  
0.5314911645391061 0.4336200143453583 0.6979067112338038  
0.5879399355859941 0.4401730746899230 0.7023044744250292  
0.4689727223885783 0.5713501615366702 0.6937620874192065  
0.5003608770159198 0.5878096029068238 0.6927704771971293  
0.4131713798730412 0.5031969102128537 0.6991231756365612  
0.5001501431930128 0.4171881430697889 0.6958169029006617  
0.5871920028305042 0.5018333103443268 0.7033676933950892  
0.5002399527439257 0.6241931671947202 0.6874362917817245  
0.4902264601541943 0.6387964832365857 0.6445588335115739  
0.4905611021519924 0.6726654925669014 0.6382595347152965  
0.5008511755924879 0.6929582948783539 0.6756656306243709  
0.5104244845371724 0.6787656098122101 0.7189967460146751  
0.5102219574879070 0.6449041921132939 0.7246509632164613  
0.6249748749347626 0.5009255105678186 0.7042494921594046  
0.6430108755377626 0.4964018504369188 0.7465189020415274  
0.6781128276485643 0.4932211167787903 0.7469594292045255  
0.6961071129568317 0.4942499292999993 0.7039640160139838  
0.6782908213372497 0.4995189789779251 0.6614713138720554  
0.6433754719205528 0.5029434055502515 0.6618069663617043  
0.5001777754618800 0.3807011349960886 0.6919001622127836  
0.4904449028647610 0.3607874900706063 0.7301212424354554  
0.4897399514148888 0.3268397416932996 0.7257113767245090  
0.4985801200326770 0.3118279623647356 0.6826721006451268  
0.5086680114204336 0.3313300696871294 0.6442981076924374  
0.5094972278336382 0.3652878735071688 0.6493321576504500  
0.3754058294422072 0.5040622548425193 0.7005083575184542  
0.3562163464012865 0.5016859658781255 0.6588242245105262  
0.3212465222441124 0.5050048723690054 0.6597875817226991  
0.3043329855465743 0.5104673476644996 0.7029314910994759  
0.3231410163488074 0.5116635136496754 0.7452075283930245  
0.3581886740240630 0.5087004041909090 0.7434254678772304  
0.1438880599022606 0.5450959448105519 0.7125603721112876  
0.7546255809278755 0.4887711204232713 0.7364210634505292  
0.7909467083424939 0.4861488103589766 0.7212013028961300  
0.813905524065595 0.4742697693457523 0.7550241796497248  
0.8481774476641479 0.4719932881977136 0.7444579696554432  
0.8601064798759831 0.4820094083822991 0.7000717352807897  
0.8375117597551062 0.4941562213968176 0.6663563016430886  
0.8030915809281771 0.4961158060208932 0.6767076220554638  
0.4913167456169371 0.2573619558455701 0.6422534492661753  
0.4925728744886682 0.2214819218326143 0.6534469820864276  
0.4708612617219014 0.2004133099410407 0.6287012321357522  
0.4711483140745156 0.1668942322959223 0.6379315681266517  
0.5150620592454815 0.2082971446045206 0.6869102345772706  
0.5155639391660282 0.1746795248768752 0.6957175102908434  
0.4934776889188678 0.1539328899182508 0.6714543690684477  
0.2468413339596561 0.5163412168337215 0.7384918016476354  
0.2112155606743397 0.5260140010848839 0.7266232893263563  
0.2021561592447411 0.5443093675139763 0.6864405912030851  
0.1686601403202209 0.5539359555152432 0.6797145058315172  
0.1861901867585947 0.5174669377730041 0.7596701831863022  
0.1527345784683952 0.5266929163130847 0.7525119494974019  
0.5063385947953383 0.7469223502743716 0.6331788718157737  
0.5048592295349340 0.7829485733473800 0.6432803351839934  
0.4831878541607588 0.7964073424949342 0.6775696962074736  
0.4824757124240523 0.8301533908863851 0.6852415870497153  
0.5255272208636149 0.8038579301591806 0.6165759216868726  
0.5250636648292428 0.8375090327004282 0.6246869354028624  
0.5035604090127199 0.8507491907577560 0.6590316509208278  
0.5776855424834526 0.3912970608532130 0.3094671946316345  
0.3324366984325340 0.5804313134474512 0.3895386648582135  
0.4204035274477123 0.6009364708536629 0.3033877908851010  
0.3902127569520820 0.5581782148469410 0.3806162052876793  
0.5146514999630823 0.3677204765650374 0.2995462417944963  
0.3663645852851717 0.4804932880014219 0.3010451304753413  
0.3919348192236910 0.4194445785721458 0.2953375680636052

0.4837356402915823 0.6247377475096288 0.3000359472682025  
0.6069482153665128 0.5727970716387960 0.3029091446371164  
0.6319992018802484 0.5115537625663544 0.3093386064694400  
0.5402586611886309 0.6126914524002400 0.2223145187244369  
0.5610362650445914 0.6698407788006862 0.2178271311883062  
0.4733534948806683 0.4872575574731647 0.2976844798958339  
0.5785988126987683 0.6689148604760533 0.3687900366137527  
0.5596933372980011 0.6112835562795674 0.3725079787399246  
0.6156755273338336 0.4625071879008389 0.3898058202729353  
0.6718614835809019 0.4385018003082650 0.4056798391567870  
0.5249886033206534 0.5056161517103663 0.3042395385242543  
0.6757397069127686 0.4037216882283599 0.2612063467804864  
0.6195677755894667 0.4277741427857163 0.2458740347245819  
0.4461476418549801 0.3808535925087250 0.3700928819785847  
0.4279415253447369 0.3229757900285699 0.3692571941475941  
0.3127102517261572 0.5587506761537220 0.2422726501420903  
0.4314376071916372 0.3228811131286795 0.2163155880427585  
0.4514050885879638 0.3804800898604175 0.2176152601041253  
0.3702793090992469 0.5359122112581982 0.2340187132399522  
0.1424276779090553 0.6393670201601546 0.3198760192351011  
0.3927299283261291 0.1365339905849035 0.2952710690432961  
0.7170922148423281 0.3901736163163128 0.3137296734325939  
0.7661795591613834 0.3772802883675821 0.4475792681807249  
0.8187573169355968 0.3440025901521893 0.4416198131735379  
0.8458653434207536 0.3351737643878526 0.3627392113620146  
0.820370709999837 0.3599407984391987 0.2903252740100986  
0.7683190090221719 0.3928180539663576 0.2962226751806691  
0.4202775927232745 0.2759635707602866 0.3284984068507242  
0.3771511041707388 0.2223303051039508 0.2082376868734233  
0.3674272332322005 0.1626845040921941 0.2236202958400849  
0.4355743039078205 0.2288735744745278 0.3370055726546620  
0.4268939868617978 0.1701199880596955 0.3513839905479431  
0.2752724587688878 0.5899075660259224 0.2869635649452686  
0.2498172362235243 0.6374180565127053 0.2968510370951161  
0.1937914677111823 0.6616375578464251 0.2803667346086625  
0.2041804103402526 0.5687024983179984 0.3936242623701692  
0.1476427216000642 0.5927457236407936 0.3765204468121653  
0.5817660810349655 0.7169248454172554 0.3265771898305972  
0.5688171882666473 0.7652218415445463 0.3325959572589602  
0.5803186921578595 0.8239869572014851 0.3424841757726795  
0.6249017193038706 0.7651387552333728 0.2014254287344129  
0.6377703864356048 0.8246827267846196 0.2124726767985045  
0.6149668904633863 0.8541904726583747 0.2830363865650711  
0.6027237099080005 0.4175865208182485 0.4992893721331033  
0.3192172028518963 0.5600047137493954 0.5747017331802092  
0.3995516615316866 0.5861701329533788 0.4943891453219286  
0.3801285531414060 0.5465927225243968 0.5713074570286324  
0.547039393296393 0.3804658190571847 0.4936478794865312  
0.3754237674332697 0.4571709675425035 0.5011460650734680  
0.4143905731074926 0.4033023188564435 0.4968509728407551  
0.4553560699439022 0.6233718623480536 0.4904943748875684  
0.5876922012344563 0.6005961809254011 0.5010773631344347  
0.6264635988362904 0.5470056806511785 0.5098844878696575  
0.5057416924344901 0.6253680399211130 0.4189002183415456  
0.5152451832134446 0.6851957179750380 0.4138607786475071  
0.47812444929625128 0.4870647353104914 0.4978055315765138  
0.5487660349026154 0.6857546527245767 0.5593004587165737  
0.5405490525459014 0.6256471698737525 0.5635975833318919  
0.6198559951899445 0.4535285513932010 0.5757462716855078  
0.6806461278782748 0.4398678173246599 0.5813039496483215  
0.5241847111632266 0.5166881399339842 0.4986096047342323  
0.6986509559814367 0.4901827611253414 0.4494742670329486  
0.6378961465119140 0.5043651456371767 0.4443203733272924  
0.4605095915033945 0.3798159284189910 0.5654519036524640  
0.4518013620413290 0.3197542377900202 0.5639445397409912  
0.3059911682014564 0.5191392628038468 0.4349880734426234  
0.4876102503499676 0.3165229136585688 0.4196363993432131  
0.4976008964414414 0.3763325864015414 0.4219663092099383  
0.3667519472613867 0.5046453941386061 0.4324376524942771  
0.1240290930067081 0.5865614575196452 0.5110333526076782  
0.4472450107171310 0.1302886528476197 0.4904947738831482  
0.7361665182521717 0.4443302804994136 0.4836763464525390  
0.7899370578374298 0.4303131508647383 0.6187738135338948  
0.8481507741162919 0.4079146648852972 0.6094885719780253  
0.8754635651057540 0.4075867404446427 0.5297065488184597  
0.8442740847872610 0.4294123880356412 0.4597115417267408  
0.7865465248690111 0.4509469621177102 0.4687817074438317

0.4676993048084804 0.2694482576975356 0.5260573528763706  
0.4055964284183481 0.2182415632222943 0.4288899659919900  
0.4018897446792595 0.1581956654934327 0.4443442516366299  
0.4978783819635970 0.2227262730325565 0.5094997534005834  
0.4952758635817526 0.1628188910071163 0.5228020269950958  
0.2646179656143656 0.5554091769114159 0.4718134853276513  
0.2306605498588206 0.5989542251318992 0.4868353605693994  
0.1717372014305572 0.6173791284956749 0.4745217386146677  
0.1952999069713088 0.5198741429985044 0.5749987646734633  
0.1358032222760922 0.5373694531961068 0.5607584166409010  
0.5320697892248528 0.7351067555022709 0.5178424828499580  
0.5019570203829739 0.7807404039593164 0.4949721430368005  
0.5035645969213768 0.8409795534900325 0.5051110196740989  
0.5977319591619997 0.7838310174684527 0.4226991003486539  
0.6002853665698094 0.8443214987621680 0.4349506810903627  
0.5527945178549515 0.8730086582142115 0.4754338077081937  
0.6151283877552001 0.4369789560540494 0.7042533064770781  
0.3102056898070614 0.5151219028660512 0.7788488674142801  
0.3852324836742230 0.5680184220282052 0.6969270554956879  
0.3725985733845706 0.5103948283917581 0.7763783725601850  
0.5673584114425162 0.3902306480146393 0.6988538664686545  
0.3844446785289512 0.4382035626511540 0.6976992585977932  
0.4317700905629959 0.3908214541698661 0.6943254341516365  
0.4330476553720707 0.6147055673438668 0.6920724527273678  
0.5688498938356138 0.6140698426570107 0.6930635761461543  
0.6159732225757590 0.5667405651254961 0.7005393857896038  
0.4821342367407485 0.6231928515294721 0.6152255809652497  
0.4831455266976786 0.6833064168210702 0.6044360642404085  
0.4813975273486164 0.4829404343231455 0.6984104738977451  
0.5182733025329757 0.6944263123676939 0.7484795465154112  
0.5177825120774328 0.6342885662750803 0.7585729485932938  
0.6292651117954722 0.4948773280169186 0.7800457226467865  
0.6917288450183865 0.4896081544086863 0.7800342091885119  
0.5189414272481448 0.5221596695356787 0.6993532757545303  
0.6920652499398684 0.5001720043694604 0.6279206047327378  
0.6300144926262347 0.5066268410573340 0.6283544975044085  
0.4833639301078442 0.3721032918014577 0.7637718045132428  
0.4819996648978039 0.3117866502937139 0.7559033881041883  
0.3068298437082024 0.5041619016316264 0.6267477667429445  
0.5155223672134127 0.3200118696967633 0.6106973201882347  
0.5173923302648357 0.3802875679813237 0.6192432012520453  
0.3689167507569789 0.4977759549650911 0.6249215564092675  
0.1177344832352532 0.5526895565807750 0.7071772902760747  
0.4937736663569408 0.1276529363519124 0.6784963915116285  
0.7397686638226216 0.4859551767113466 0.6665257748367556  
0.8041029288691135 0.4671766477249047 0.7897106150624211  
0.8657172188353404 0.4625446186885087 0.7710212128757947  
0.8870057280078192 0.4805185462824466 0.6918866030499713  
0.8466790516529424 0.5021959398840721 0.6317406786563168  
0.7859722423855947 0.5058869547914481 0.6498439751121027  
0.4982349216879122 0.2657595616700278 0.7125490128103641  
0.4537915011194670 0.2107023211504215 0.6022498203258256  
0.4539002396926993 0.1507827418781560 0.6187705666714022  
0.5330593207042169 0.2241558358220642 0.7052223429309067  
0.5334167330327857 0.1646415151018699 0.7213861613221941  
0.2597051639283222 0.5189093276936049 0.6677463868119392  
0.2210796565963185 0.5517869774136939 0.6603875081046457  
0.1620033681283793 0.5685507144722709 0.6486742368106938  
0.1938318672999861 0.5037230920567296 0.7910761972584156  
0.1334757213787574 0.5197270146685298 0.7783294000094030  
0.5012604333126738 0.7394684187449032 0.7039985474958347  
0.4659190826360527 0.7806613051478588 0.6974040954739247  
0.4652205771442997 0.8403964540613824 0.7115433455175083  
0.5419672725149925 0.7933507397444375 0.5895205197196905  
0.5415222593168335 0.8534930729271700 0.6039836099466337  
0.5030942552767663 0.8771294719024789 0.6651982501467812  
0.5184585991259754 0.4501329532867835 0.2997034765192404  
0.4494994135745730 0.4776812922206329 0.2971047947521093  
0.5489209367574538 0.5149900390889995 0.3051971563791595  
0.4802447190830516 0.5423264313385946 0.3012210250901260  
0.7096031162468140 0.4047876524768478 0.3410058677238803  
0.4199124898189503 0.2856226423972467 0.2951276537478893  
0.2856933920092082 0.5841317815469662 0.3188855921362432  
0.5806109088633183 0.7065521292992669 0.2936829888232737  
0.5305847694514301 0.4612645145306030 0.4997798854545910  
0.4570849952619683 0.4725451292753897 0.4978782461747125  
0.5451617511314527 0.5312615601691006 0.5000263179829821

|                    |                    |                    |
|--------------------|--------------------|--------------------|
| 0.4717162415992791 | 0.5425603762356009 | 0.4971226838911463 |
| 0.7278752682991441 | 0.4540177481133668 | 0.5150921101398643 |
| 0.4646667120748995 | 0.2798012028083099 | 0.4932486227566860 |
| 0.2740675373746503 | 0.5492410503589988 | 0.5044005719117524 |
| 0.5364797004765877 | 0.7237964956303667 | 0.4860333729162710 |
| 0.5359197608931727 | 0.4668795689765612 | 0.6998878821557197 |
| 0.4626532577233793 | 0.4657160509821610 | 0.6983528365614533 |
| 0.5377243699094002 | 0.5393482488209043 | 0.6995085784264871 |
| 0.4645035724746000 | 0.5381218982921180 | 0.6964483579128632 |
| 0.7312679690609686 | 0.4899680013434552 | 0.7003097520409595 |
| 0.4978879492516835 | 0.2772678073794394 | 0.6805260739946818 |
| 0.2692167839375413 | 0.5155680528255441 | 0.7010636198528926 |
| 0.5010541101012963 | 0.7274790040324350 | 0.6723502821472741 |
| 0.7255797733806413 | 0.4214009488282555 | 0.4160169376677742 |
| 0.4076359273808595 | 0.2743114572423188 | 0.2169560494255799 |
| 0.2704938537044790 | 0.5740286298362911 | 0.3966510414964466 |
| 0.5919375925559710 | 0.7150902229346564 | 0.2144998877573080 |
| 0.7405637892946182 | 0.4650803224696341 | 0.5929366643011252 |
| 0.4436262294959929 | 0.2707370307023524 | 0.4179769990731800 |
| 0.2597682838740878 | 0.5350789128332514 | 0.5810418542155176 |
| 0.5606257158192255 | 0.7303464281408444 | 0.4121170055927860 |
| 0.7471181334593336 | 0.4898808434667475 | 0.7790501479898931 |
| 0.4845383797155981 | 0.2677532655157529 | 0.6019829782087164 |
| 0.2549195810336899 | 0.5097501643205886 | 0.7798379222226248 |
| 0.5122539312841753 | 0.7360477200547191 | 0.5929068417870742 |



N-CENTERED TETRAMER

```

1.0000000000000000
40.5026200000000003 0.0000000000000000 0.0000000000000000
0.0000000000000000 39.8320900000000009 0.0000000000000000
0.0000000000000000 0.0000000000000000 31.4138799999999989
  C      O      N      H
 288    16     32    200
Direct
0.6368161204216226 0.5098200486584024 0.2956634508040954
0.4262085813003783 0.7913489818933147 0.2492592283045894
0.4065207105137811 0.5523380990221585 0.2431689779042318
0.4272992687624930 0.5790951816424854 0.2412580590169092
0.7926737776022428 0.5533162402368083 0.2592683054295341
0.6754542861149507 0.5308690004452615 0.2277000732418196
0.6416972012504971 0.5258352377930130 0.2220968818404260
0.5399113087988644 0.2506768371065514 0.2101684466775011
0.5306898399677209 0.3075080694580481 0.2413684215858711
0.5292602168343742 0.3258499457043905 0.2031682461679551
0.8267519561334543 0.5557751665643351 0.2534669811655698
0.1702328414880111 0.4676964895287718 0.2399508038793090
0.3260424986407296 0.4670035716160074 0.2172480239589022
0.5725592903360093 0.4777249378421078 0.2495825822309372
0.3093450204017810 0.4737187428257116 0.2554701634858222
0.5162295815480805 0.3769966503069116 0.2426737690748052
0.4142621908730640 0.8239890577068703 0.2545349161991581
0.8014849971721343 0.5318027419763233 0.3304237663407553
0.5166327547079202 0.3581546815710389 0.2803924795089033
0.5529005961990907 0.2162303573321201 0.2202591759751465
0.5443421990336000 0.1904097130236709 0.1918832746500823
0.5562989844821246 0.1579608485259692 0.1977871878905715
0.5739626920777576 0.2090020273953219 0.2545283384430823
0.3780452303841353 0.4849246838193557 0.2486610622220031
0.5862865245582921 0.1765295637162796 0.2600332588768783
0.1688346607488476 0.4231496005304831 0.2922616075258279
0.5774445208413803 0.1509507173209811 0.2318453582755475
0.4555803587190763 0.8091793601872687 0.1860530259805981
0.7797164538630894 0.5411062194184161 0.2977477119211607
0.2555585514302902 0.4583719429912492 0.2905500434484242
0.2198479129639733 0.4534322834051627 0.2794996291024137
0.4469530798591022 0.7836570029371408 0.2148226823724284
0.3269792218158044 0.4866874673214768 0.2901415526748712
0.3599074533802014 0.4724334884579165 0.2140153512680767
0.2036086679472631 0.4730033921183193 0.2487466654591838
0.3608601442992442 0.4922598833527017 0.2863517785749207
0.5393582217679500 0.4347760025933308 0.2453309490415475
0.6901214779624072 0.5257567836481526 0.2676787393263106
0.4595035918859458 0.7489905753425322 0.2050483404535769
0.1528354592079562 0.4426332846933368 0.2615136599971262
0.7433663798632981 0.5378988265541080 0.3062644273803444
0.8355175228846874 0.5339285816280595 0.3244166299558471
0.5239360571766519 0.3239974025656647 0.2799613720147086
0.5223184767732079 0.3601390430958533 0.2042992935015278
0.5934318846422590 0.4479077101338469 0.2499623180019424
0.2020585244690319 0.4286760860739889 0.3014589541613569
0.4607093665108856 0.5654392282164400 0.2416927652776063
0.4440053266569500 0.8417979902958875 0.1917341547064418
0.4891409204892789 0.5860231914246874 0.2414044352810356
0.4146061671881943 0.4895385580816841 0.2459894526889792
0.5109673591904995 0.4142006350123024 0.2436106298170581
0.8482373260298541 0.5458662448352941 0.2859187852794335
0.4774760848560210 0.6768455525115147 0.2758018730591840
0.4231739357086672 0.8492700136755137 0.2259530563462497
0.5727435086176507 0.4211216922407151 0.2471324265806943
0.4781505811688294 0.4255970465124403 0.2437046374515318
0.4337168476768934 0.4600412178375478 0.2452173853341391
0.4849608036813757 0.6427355720541695 0.2767767588088437
0.6216857167688218 0.5153462260842128 0.2560804510872861
0.5852594362203591 0.5107370326562360 0.25094289800705919
0.6705376183831899 0.5150068262569280 0.3018441572007887
0.4838587101148821 0.6231798324502377 0.2396581256152925
0.4760813866565394 0.6392917044598315 0.2012575583138259
0.4690251818625392 0.6735360195867687 0.1995603786689511
0.4691210928769173 0.6925894086994623 0.2372414860576645
0.4220644349108160 0.4260179744900016 0.2458645666711755
0.4490325775353396 0.4051285836911003 0.2445188592532651
0.5662308506988831 0.5402086487459491 0.2483402323848839
0.5219284349915333 0.5746482510398273 0.2436675525049735

```

0.5510559766171552 0.5950915495237820 0.2450192802239428  
0.5779342806266555 0.5742104259122437 0.2482745651415420  
0.4273652008486045 0.5225318320460201 0.2446822973599616  
0.6352884286120815 0.5322995848388169 0.4641042374946874  
0.3751987695260570 0.7745743700389773 0.4101101046289455  
0.3984981072509358 0.5329372281750878 0.4160980517353340  
0.4133163424551264 0.5635298606084936 0.4149034061274615  
0.7829884293586037 0.5953183774081848 0.4173681396306033  
0.6645520025923359 0.5665498285355373 0.3968340872377289  
0.6314527854381664 0.5572918553985314 0.3944947002839995  
0.5791108440721749 0.2615467337793685 0.3818623164259357  
0.5657539894196092 0.3169389514934295 0.4133422278580394  
0.5703997026044766 0.3383763344931507 0.3784904664004663  
0.8163512234309691 0.6028753403908684 0.4116674942236635  
0.1770190843059802 0.4293501076932070 0.4162087741527294  
0.3366964606779173 0.4354199395074971 0.3851534986650727  
0.5753708261042400 0.4932966929109976 0.4229253177747034  
0.3172088059672835 0.4415963012731979 0.4211627891334624  
0.5403034641807505 0.3829005607305465 0.4151499608168125  
0.3595563767215187 0.8054949486310908 0.4158357342449416  
0.7932935289235233 0.5838238818071986 0.4918464487742740  
0.5353459197566725 0.3608917114877652 0.4494598119820990  
0.5968220685386035 0.2291974126435239 0.3906254425002608  
0.5833486919350931 0.1993584302724431 0.3744778371029523  
0.5994518538333795 0.1688488283457842 0.3808911401993772  
0.6269038277377491 0.2281082605908703 0.4127213382082142  
0.3840069842858680 0.4616878781922654 0.4194309393281718  
0.6433733260640404 0.1976051967536451 0.4182190763188861  
0.1818789108938669 0.3766707208719991 0.4539954069354561  
0.6296167126915940 0.1679248984030860 0.4025520232114762  
0.4183636803653122 0.8019943154258058 0.3696311307027913  
0.7711495956760888 0.5856886498817860 0.4575614034080465  
0.2662709847777366 0.4173430137573190 0.4523344727411227  
0.2302344506336788 0.4117165406954672 0.4438583889360366  
0.4046683738049658 0.7726019764677833 0.3867770055656168  
0.3312354844014236 0.4575615770288090 0.4565280815479964  
0.3697152706718406 0.4452372798063392 0.3844728306355396  
0.2107857090937015 0.4350394680097481 0.4216640556957458  
0.3641789678875417 0.4675767531693708 0.4553534235463840  
0.5516727514793592 0.4442503184654810 0.4184734695138049  
0.6833163299131046 0.5586415737445214 0.4329561846210824  
0.4216466531562986 0.7398533931446512 0.3779504515851639  
0.1625445782889518 0.4000951713274722 0.4321142354216735  
0.7354306626996315 0.5783743515900537 0.4664676793960685  
0.8266674010315020 0.5909784902716645 0.4859768880358733  
0.5480569699603194 0.3284002019860650 0.4487957827096410  
0.5579733525508060 0.3709826243218329 0.3797410266190310  
0.6018853273046821 0.4685262065376319 0.4225507087789889  
0.2154339567993025 0.3826277607573010 0.4602891140230724  
0.4487952004909552 0.5572786933546283 0.4153128243139017  
0.4030965237517889 0.8329216120267502 0.3762376995381354  
0.4725372894410932 0.5833523929672605 0.4153688565608882  
0.4190760875311770 0.4732038703292379 0.4183750195291350  
0.5279834504365787 0.4181938463489111 0.4166723954671477  
0.8382804200209958 0.6005944258881860 0.4458721657952728  
0.4516283985108224 0.6731835679217441 0.4464170927306581  
0.3735325950949351 0.8347208041921997 0.3991426929019666  
0.5871063879507847 0.4379690767019787 0.4200276000153624  
0.4935311747791294 0.4227619139170825 0.4168835178462978  
0.4434856185833614 0.4480661474183489 0.4178795498113235  
0.4643337437308574 0.6407116736368104 0.4476856799756210  
0.6162588226488739 0.5396819762668058 0.4279011274517768  
0.5812595118706235 0.5282877291864015 0.4246004420782807  
0.6683669629767353 0.5416924798455383 0.4669414182240856  
0.4603083130155903 0.6186469732664011 0.4132146795307937  
0.4435766682525433 0.6305419812967598 0.3770372896619273  
0.4311508919329216 0.6631343551451112 0.3751852723804264  
0.4348649814797139 0.6846285879171893 0.4101880562775209  
0.4383470226523784 0.4124367209502144 0.4173501939577834  
0.4687051233600346 0.3970944701067406 0.4161601551698116  
0.55688609255537327 0.5534375992335562 0.4226821059603827  
0.5069372216737759 0.5787548293318806 0.4180994310071404  
0.5317513667657144 0.6044139207684969 0.4195105325111104  
0.5620075792836750 0.5890715131678048 0.4229160989031244  
0.4249942964012349 0.5081862759357340 0.4175757665475020  
0.6264805955743097 0.5575268627741936 0.6249257547793593  
0.3290029974124447 0.7468861087289709 0.5714138097394459

0.3928238187131047 0.5133804100490583 0.5787561356267490  
0.4021213521408196 0.5461399861783537 0.5774338491876290  
0.7610213781977097 0.6444753710385560 0.5744474831487720  
0.6486220692819548 0.5948960511133419 0.5557913964019661  
0.6176625479591926 0.5797119857785729 0.5545700138780801  
0.6191149496333290 0.2805108323954962 0.5422692965460360  
0.5956428583664719 0.3320619288245530 0.5748663378004402  
0.5960090235298514 0.3542233353562266 0.5402427195042240  
0.7927747704650681 0.6572337036116828 0.5683615995099391  
0.1939678015414619 0.3679281805516846 0.5731269104047007  
0.3498482722408539 0.4052885797059062 0.5476662134028109  
0.5740489759787268 0.5071998790793714 0.5858429380846695  
0.3287462380237137 0.4087109130934624 0.5827470148807403  
0.5589929631905732 0.3923053547355327 0.5780621055004697  
0.3075974867416096 0.7740175088007182 0.5769722059892055  
0.7733828614832682 0.6351899721397022 0.6488903984293399  
0.5584897380842471 0.3695831224767630 0.6122197210951189  
0.6422366448999576 0.2518623046063779 0.5507640101200186  
0.63542364216096390 0.2207600884823152 0.5317425624906068  
0.6565760371859183 0.1935903490575450 0.5379015566937577  
0.6708629084814485 0.2554995757720341 0.5755156449324897  
0.3910382158236145 0.4405651378762527 0.5821495770496490  
0.6923542160967754 0.2284108181803770 0.5809334189175592  
0.2084074858927163 0.3184194670240845 0.6136590396251379  
0.6851880256003707 0.1973890924686230 0.5623672497448909  
0.3652983433873421 0.7819986463231149 0.5292813634543369  
0.7510217325970384 0.6333357357969122 0.6148414601880839  
0.2823662250902830 0.3764093477071139 0.6138070279932011  
0.2486674824106472 0.3628511469266218 0.6039565414109557  
0.3579965898115655 0.7506825644786959 0.5474262846809933  
0.3388903703372033 0.4279576557128855 0.6177230612410938  
0.3806412979407311 0.4208519013092742 0.5476049269776222  
0.2256068802168751 0.3808664820544632 0.5797015891205092  
0.3695696072072292 0.4437877293157840 0.6170532186810619  
0.5592370324634374 0.4546543267693509 0.5819815538619324  
0.6687892011111795 0.5915133641227672 0.5917936313666570  
0.3809365120252883 0.7219006545194706 0.5388921060737838  
0.1853648205746027 0.3366417931834293 0.5898607970901264  
0.7169441357339631 0.6204032497460016 0.6241987215493358  
0.8052047671060845 0.6475573832714591 0.6426354974274973  
0.5766783202980036 0.3399097398694247 0.6108352517690661  
0.5780041395225385 0.3840008057843336 0.5421706993188969  
0.6044407515153907 0.4875887254723986 0.5860332247503860  
0.2397416992210883 0.3316330291683657 0.6211338908885464  
0.4381099799957811 0.5463556449525040 0.5779633362866604  
0.3442144870257703 0.8092070718577755 0.5355973621527562  
0.4568918029526491 0.5762860824799915 0.5776350509190721  
0.4234917118380692 0.4582712727731799 0.5814257219350013  
0.5405323716634571 0.4247185711503842 0.5800031471737906  
0.8149682737005549 0.6586953920902868 0.6023574459724902  
0.4216434493576351 0.6614759219716146 0.6078573164864632  
0.3152271181220600 0.8052421560574514 0.5592800870129061  
0.5952001248926264 0.4548467657881120 0.5838723101464828  
0.5058470930272555 0.4227491250207653 0.5800766613912923  
0.4520297955091067 0.4381080687795397 0.5810368250099539  
0.4391741986651040 0.6314413950161669 0.6095395126927892  
0.6061235884803815 0.5604400262677262 0.5889092951556060  
0.5737260322869230 0.5427090358730077 0.5866133408181667  
0.6573473208872012 0.5729286752267033 0.6266942221676761  
0.4387473938946252 0.6088254311046013 0.57526210331258346  
0.4204535487702575 0.6176180162667819 0.5389382810597332  
0.4030595528755538 0.6477594471504075 0.5367349199438505  
0.4033705811547156 0.6698017133497041 0.5714788993679477  
0.4535037060679226 0.4021401072825317 0.5807951671088635  
0.4861457762282865 0.3928278605207778 0.5795812687143487  
0.5452319847113302 0.5628331598492075 0.5843897204217774  
0.4915407130884503 0.5782212981014418 0.5800412146850228  
0.5112649115201351 0.6081352854296107 0.5807374789610861  
0.5438038890758886 0.5987917142185072 0.5839595366218082  
0.4231999330990858 0.4937791679133720 0.5805165710668259  
0.6145865511282970 0.5818637811080500 0.7998280124768827  
0.3005571432964234 0.7235114511223385 0.7441577905609736  
0.3936374750323884 0.4946299948716564 0.7544348126789379  
0.3970545012385834 0.5285487577124430 0.7528794465696846  
0.7357612988918053 0.6834126760237065 0.7381243904782887  
0.6350161737425922 0.6133625701479900 0.7254862841787272  
0.6062164947153484 0.5943475371483078 0.7257738286195050

0.6501392267675374 0.3006775816193272 0.7063514764224111  
0.6199230551010633 0.3479580450111312 0.7426316370414761  
0.6149961658999427 0.3697104105363022 0.70814431114746460  
0.7627655117375745 0.7041508472359050 0.7295852531656386  
0.2217760022683886 0.3189646190515757 0.7355872461230042  
0.3639619693034879 0.3886814118072639 0.7185938587271679  
0.5729333180091388 0.5198298436991425 0.7609256160900109  
0.3477398190058718 0.3810925417745289 0.7569610893451121  
0.5774002678532656 0.4037849565597587 0.7510446136121637  
0.2783818964687125 0.7496055336689561 0.7520636122284874  
0.7544833248832358 0.6772113127882834 0.8107998550836775  
0.5828308568778928 0.3819242869511343 0.7853895616347160  
0.6743460163079379 0.2733606112272738 0.7166160870378470  
0.6720423489751360 0.2429392536267949 0.6943451207624349  
0.6941107089226748 0.2169342552229060 0.7028241162859995  
0.6995290727317698 0.2775378316703926 0.7469146540313251  
0.4043191019206424 0.4227249174463569 0.7564258960293011  
0.7218380768656321 0.2515996029458434 0.7549845276886894  
0.2312795994881633 0.2857019822529517 0.7987955974083759  
0.7190422115954851 0.2211848437121434 0.7331442896225774  
0.3282386002177079 0.7578010228758946 0.6914389985612442  
0.7313411733807705 0.6696926192197550 0.7788991995145050  
0.303586615338432 0.3447059126188246 0.7876150372110142  
0.2717538818638090 0.3272625524183541 0.7768616968942161  
0.3257565673974877 0.7274545732888245 0.7138417875637835  
0.3603713288841048 0.3940084464037667 0.7953005228721922  
0.3919341393014790 0.4090050194352798 0.7185325543800546  
0.2518650612610748 0.3354101105820842 0.7417656672290255  
0.3881575256326273 0.4146788061479227 0.7945412445412361  
0.5674772906259761 0.4654803668387582 0.7568620543150459  
0.6541439571519267 0.6167624990787234 0.7626007411653756  
0.3497945776932930 0.6999583046648710 0.7036606500542069  
0.2114646533613796 0.2940547823811374 0.7639082910832886  
0.7024779523290301 0.6481628501936978 0.7919144281638384  
0.7815264940461288 0.6977162941281514 0.8021643285791139  
0.6038404365114429 0.3544309323124171 0.7813595290047242  
0.5940493364785873 0.3972665770994259 0.7127324815364208  
0.6062758101901748 0.5059757369060113 0.7605226485202772  
0.2610638420565307 0.3023803764969035 0.8053750985217323  
0.4324499071032098 0.5352522025285543 0.7530819301381255  
0.3063391237494081 0.7839792481248217 0.6997967376282503  
0.4458276030155227 0.5680229957448669 0.7526617967948959  
0.4333482462238055 0.4459727309607359 0.7561083179673672  
0.5541331021546814 0.4327752963272184 0.7546146288335884  
0.7857243382283540 0.7113239481840826 0.7614851318224836  
0.3962518891393532 0.6465619359365692 0.7788429867544355  
0.2813580237063500 0.7799460293386353 0.7300906511083475  
0.6028494694071496 0.4720935924394009 0.7580293105014015  
0.5202965837752006 0.4248750751533651 0.7548936977462888  
0.4647735948176153 0.4310801939887934 0.7558128863552644  
0.4173251094727119 0.6191389455020567 0.7829966992832962  
0.5957381244610148 0.5776843328792090 0.7627575991698031  
0.5665459938407009 0.5547321292559778 0.7616531189565441  
0.6433058769771802 0.6012214593970557 0.8002976141764017  
0.4226126072190370 0.5970087517779132 0.7488696716980879  
0.4056798796929476 0.6032247427751896 0.7106623304667172  
0.3846782295855559 0.6307289713888901 0.7059390344669372  
0.3799506809137226 0.6527523464988856 0.7401934831374557  
0.4719583797546589 0.3958488935431262 0.7544082397493597  
0.5056611561933146 0.3920771335325349 0.7534412468191983  
0.5351217832548034 0.5696378685076744 0.7596787497652776  
0.4796464016218838 0.5759048216444310 0.7552931395096236  
0.4943291529597816 0.6087006861301123 0.7557043742441970  
0.5279529940028161 0.6048766095759082 0.7588145204482303  
0.4269707367241279 0.4808370122349913 0.7554988968174985  
0.7318243390708008 0.5410399392546452 0.3427067726677373  
0.4685888364260991 0.7415103050593728 0.1686319296854949  
0.5301862594106350 0.2575872604208815 0.1738444657153520  
0.2663108103469233 0.4537970805875844 0.3271045839092062  
0.7235926298550103 0.5827712630739376 0.5026498287265641  
0.4353747241845747 0.7343977148826042 0.3432084088518865  
0.5649723664121939 0.2665500126478311 0.3472813268741097  
0.2792216511361053 0.4082838503160415 0.4863893345136657  
0.7047208369748882 0.6231312365676100 0.6604152767153070  
0.3954836677733286 0.7190014708129550 0.5041845429208200  
0.6047876942887193 0.2834755519283300 0.5074132752467561  
0.2954194534854807 0.3719094433256695 0.6491922473291117

0.6965089834940715 0.6429556603167824 0.83002422427206508  
0.3608369687111243 0.6955824553008499 0.6672069357533970  
0.6389795350187284 0.3048645444077378 0.6699150138962149  
0.3148640364562583 0.3436527534635212 0.8242294799027895  
0.4601564303157534 0.7267302947793407 0.2386500275394659  
0.5398418598099456 0.4691855546288332 0.2466483467699005  
0.4676427994880810 0.4584802531654130 0.2439405197526619  
0.5323643892642375 0.5417754494761450 0.2455092437046948  
0.4601585589676245 0.5310465987542361 0.2436113417391055  
0.7246134402074993 0.5307231128616364 0.2710763942001166  
0.2749372802793308 0.4678328212548195 0.2566671155876641  
0.5396642638697154 0.2733870859471669 0.2432761309710806  
0.4209921673657736 0.7172496891759748 0.4108588367966358  
0.5451181297680174 0.4779970797807039 0.4202788047546017  
0.4771159966479132 0.4530212687531827 0.4177482009539326  
0.5233124578995627 0.5484931128160904 0.4199653395182777  
0.4553021945838238 0.5235225090941511 0.4169830856403374  
0.7173958974124991 0.5668350977073303 0.4327441587898411  
0.2833198134174585 0.4326818639119774 0.4200983556368626  
0.5797203364149119 0.2843445107245269 0.4145294553828611  
0.3844838917547059 0.6997348676079035 0.5719090793125925  
0.5469125763940773 0.4866907808407479 0.5833839878567212  
0.4841635235113401 0.4493609620241790 0.5807830644728657  
0.5131399883756081 0.5515993272738536 0.5821566520586137  
0.4503765813081226 0.5143116844574093 0.5799262131114955  
0.7008239929498425 0.6057822775603297 0.5907196430744345  
0.2971882913350002 0.3934827102790289 0.5810794591199516  
0.6150423137608846 0.3024520563893260 0.5754267112485343  
0.3584755122793664 0.6806624907450508 0.7381857845053049  
0.5497609422976278 0.4947777450876448 0.7588490066509769  
0.4946738622700950 0.4475192303987444 0.7562811807557045  
0.5052221478993654 0.5532278310657545 0.7577380110057639  
0.4501509290893881 0.5059532542477674 0.7548480985817964  
0.6835599302991007 0.6354143723384433 0.7593081833314957  
0.3188546623901393 0.3615121974140248 0.7546953634654795  
0.6414401645574401 0.3200721214043318 0.7407695583781072  
0.3796938935243421 0.5525654780780533 0.2432480081501018  
0.3744320612144825 0.5022213079846514 0.3135994563997434  
0.5791782870712211 0.3946503383492994 0.2462412775783892  
0.3962493683702794 0.4187779333933901 0.2471453120237381  
0.4492428596962296 0.3778760931005063 0.2444115029595534  
0.4208813108578635 0.6055474075627758 0.2396425037654729  
0.5509206155333705 0.6223273081266111 0.2438272546085369  
0.6037293824028096 0.5814210074964459 0.2502795945953453  
0.4752201829008916 0.6246135866376904 0.1719048954444362  
0.4633188616312287 0.6856224851370767 0.1694199779083794  
0.4827228841184046 0.4790844491000863 0.2440547848631546  
0.4773222688711898 0.6913990098346187 0.3052903794031719  
0.4911063220601382 0.6309076933718883 0.3071087840353777  
0.6217577555056594 0.5014451440114688 0.3224744284863519  
0.6816025315834385 0.5110284575352593 0.3329882869822247  
0.5172555024640912 0.5211948774801125 0.2455256619487454  
0.6905845514937775 0.5391133342267906 0.2008250902401966  
0.6306355045918788 0.5300894676892817 0.1908661282272115  
0.5116888911585356 0.3705597962778914 0.3107131372518858  
0.5251898807825993 0.3099791107346396 0.3098224780026655  
0.3124131389637083 0.4571234863069832 0.1899305102855594  
0.5337078586137300 0.3131730071631133 0.1730679266625822  
0.5219690763746915 0.3742426460828758 0.1744801837184048  
0.3725732975127122 0.4668725433480152 0.1841622492819999  
0.1267650103681501 0.4384056192743501 0.2545077681708595  
0.5871597002614055 0.1256078116303987 0.2362704781619943  
0.7372403462260719 0.5289211824310943 0.2431749560072024  
0.7912212837333403 0.5227939913166216 0.3604302253459957  
0.8521860854439254 0.5262959924525742 0.3499528970570774  
0.8748931119428524 0.5476133191857484 0.2812611838362093  
0.8365395785922477 0.5656177500259301 0.2235926783812592  
0.7762791370821135 0.5620028205857353 0.2339102100865457  
0.5454164265441134 0.2647892316430759 0.2730032265646539  
0.5283599831655541 0.1966461189514010 0.1650616527403025  
0.5493059803212966 0.1380740965735152 0.1756176217667031  
0.5814457783468896 0.2285849663440383 0.2769137314233112  
0.6030390014387017 0.1713323095171517 0.2864434785385209  
0.2638873037954091 0.4660527785071212 0.2276580283620160  
0.2167392208645152 0.4932292348236567 0.2324329830049132  
0.1577392372583576 0.4833327530699705 0.2163904442941186  
0.2146714020650008 0.4138422281562879 0.3256979744577962

0.1553349218991629 0.4035812754615788 0.3092739017082289  
0.4550090430961982 0.7357884922527205 0.2683381022593109  
0.4186658958789934 0.7719892782447573 0.2719245634022466  
0.3977359192427201 0.8295504088783201 0.2810635061421278  
0.4713242908042668 0.8026012452351882 0.1591298205354981  
0.4510637829159265 0.8614597797253527 0.1692809290210520  
0.4137640212771080 0.8747463620365533 0.2302165380425868  
0.6202206528757878 0.4477092226758251 0.2518322633752126  
0.3143461743560137 0.4919710897846217 0.3199705055442384  
0.3722084908209380 0.5275609667967248 0.4160715641949427  
0.3748433055443701 0.4803002557909464 0.4829011166306488  
0.5989661863867173 0.4135234632147908 0.4192082699638410  
0.4143198138676639 0.4003843667306186 0.4175090974119123  
0.4737658954890392 0.3703566645997395 0.4150391140964468  
0.4014779850910257 0.5879814380472599 0.4138797724973898  
0.5267496771323029 0.6311558624171922 0.4182247675229811  
0.5859570923737594 0.6011544574593637 0.4250846147184943  
0.4401056712796438 0.6138325407767248 0.3498516244758680  
0.4183673717798437 0.6718597315632789 0.3467602955713102  
0.4884110292209720 0.4759906776576290 0.4182488665783242  
0.4540033318441907 0.6896790809225757 0.4739890050927859  
0.4769622618111664 0.6320094849614974 0.4763348435488950  
0.6239143031292135 0.5187898937391296 0.4905555653475905  
0.6826316044638517 0.5358162783401029 0.4953513604884120  
0.5120235571923366 0.5255221368262368 0.4193604742751257  
0.6762597186727302 0.5794305232718688 0.3701502672736481  
0.6172823050132535 0.5631962753619763 0.3658965818550908  
0.5219531836915360 0.3696394921621316 0.4775060394199495  
0.5449203907434167 0.3119087453257472 0.4762378663770350  
0.3256747900215756 0.4233624644911450 0.3573805701996193  
0.5839270891555810 0.3295909835883845 0.3506641867378538  
0.5622056572402964 0.3876926780081368 0.3527336101482261  
0.3845669755084234 0.4405363574213138 0.3560852536978905  
0.1361676651704784 0.3956141918297350 0.4276616299461579  
0.6424428171787494 0.1440651900168380 0.4070287652652571  
0.7290041158858420 0.5631071242172970 0.4041460542965684  
0.7837832484770423 0.5767946158690817 0.5230892305919526  
0.8436510719741012 0.5892388745283452 0.5128761599210674  
0.8643832062700695 0.6064495446508839 0.4413159939859927  
0.8252068731890363 0.6106200872149867 0.3803474982240159  
0.7661917789688871 0.5975761962521969 0.3903241279800803  
0.5883599922260916 0.2767678115640472 0.4436825598189297  
0.5601474731628319 0.2005023169601443 0.3568769110864056  
0.5885414331480288 0.1456843715319716 0.3687300085946685  
0.6377883929700984 0.2512205673995342 0.4250808805250040  
0.6670379746429954 0.1971061910570856 0.4348413497579188  
0.2719031222806811 0.4355460909873554 0.3912154570903581  
0.2218844970727689 0.4580109019932760 0.4091952160641968  
0.1620059243508087 0.4478908981062191 0.3994639037811137  
0.2306287806422082 0.3648661703188510 0.4780472423607978  
0.1707041992381468 0.3537327295555967 0.4664340615812876  
0.4126414131194688 0.7251923966664882 0.4399829782370508  
0.3641361447066999 0.7518519258324160 0.4233424980187990  
0.3363731175823044 0.8066852723132284 0.4334948693819654  
0.4410969920889583 0.8001612495353903 0.3511330909479656  
0.4142183292117524 0.8557200500541234 0.36331242968746399  
0.3613592282772460 0.8589063528451165 0.4038255689862836  
0.6281583710905728 0.4738442825183594 0.4240188015596515  
0.3163475001141169 0.4621908205716429 0.4848018918659319  
0.3678780188096586 0.5033815584494353 0.5785922660762606  
0.3770586098791441 0.4591195028391404 0.6441964587099505  
0.6111150284907467 0.4329020804651179 0.5835180836995262  
0.4321127527043937 0.3857456213326160 0.5813444112743534  
0.4960092015289810 0.3675063871601417 0.5788095808161029  
0.3862286434516861 0.5680801601477139 0.5761985012075309  
0.5014979578988391 0.6334682474642950 0.5791946057269719  
0.5651840514589450 0.6151472556482530 0.5857082523439403  
0.4198880745142123 0.6004617045735205 0.5118389132903702  
0.3891902878989693 0.6541749728425394 0.5081656491178143  
0.4908864129910103 0.4741178703728230 0.5810583025350018  
0.4214828966419529 0.6783917697590433 0.6351791134036227  
0.4530528002874604 0.6251256524840094 0.6382298080544818  
0.6180337162985117 0.5426892142872149 0.6520462191798556  
0.6726857590999753 0.5703788831486063 0.6549603005219351  
0.5063882659808904 0.5268502161285828 0.5819672646241713  
0.6576531779199739 0.6089293087184647 0.5283196128599820  
0.6024494851273980 0.5821636920613971 0.5260548935365719

0.5440767628754428 0.3755334109231288 0.6406042971290798  
0.5767343103011032 0.3228904021308505 0.6380588761726378  
0.3416864387490670 0.3908711594569980 0.5200606688144180  
0.6104135079063675 0.3481964197408082 0.5119837495950733  
0.5787194612656487 0.4012988948172713 0.5152215856810478  
0.3966766870071482 0.4182626881803234 0.5198644137522797  
0.1606667508107660 0.3264816844050845 0.5845096769286162  
0.7019549765961711 0.1761964322638284 0.5667861822788990  
0.7128153781618793 0.6036537079206085 0.5620874239869508  
0.7652783677307952 0.6268697116752787 0.6802741719657149  
0.8223839026473855 0.6486711109835617 0.6693859441720919  
0.8398268642012737 0.6686100981281509 0.5974927747920321  
0.8001800578782320 0.6660522192051105 0.5368766582830281  
0.7440120412114103 0.6437023692151468 0.5474989832845333  
0.6245579255044800 0.2960349408762911 0.6045300595861587  
0.6133630327559010 0.2182875481860535 0.5120627775199401  
0.6508184521930953 0.1694016350215983 0.5233295894536100  
0.6767343707044223 0.2796743079771520 0.5900704527016760  
0.7147890189550175 0.2316207533442808 0.5997621980763744  
0.2864649465734102 0.3926600172653689 0.5515286994448869  
0.2321656415653602 0.4053304755193569 0.5664759014111602  
0.1760285127194947 0.3824011256758637 0.5548078415956094  
0.2577205506108332 0.3179929597474123 0.56403753766674058  
0.2018614562335136 0.2938731682175960 0.6266471447234789  
0.3748463951499720 0.7061536088606953 0.6009357738505244  
0.3227878818139782 0.7225147894557128 0.5851842164404020  
0.2848763284211864 0.7706855468852073 0.5951853090387361  
0.3876479344854490 0.7846198591385936 0.5101783973720113  
0.3503331960061216 0.8335882160128142 0.5218027045691135  
0.2985263133892875 0.8264735257630519 0.5637853321746589  
0.6293627560344702 0.4975715268581349 0.5876116372863148  
0.3227272438972041 0.4306493521269328 0.6452230279115547  
0.3709237069288853 0.4801178208081739 0.7549868546846676  
0.3974463682636538 0.4249701246557115 0.8244643947620910  
0.6222678337417561 0.4532856690999639 0.7570827946504155  
0.4533339158529235 0.3762555462759831 0.7539111713170735  
0.5194691965972147 0.3687546275844242 0.7519856068479928  
0.3776140227869631 0.5473343896166343 0.7520495628542970  
0.4806321198327238 0.6320755572335350 0.7539348340967162  
0.5465355746999709 0.6244792933002377 0.7602439369325887  
0.4092556283697384 0.5862266114936884 0.6837837704828187  
0.3722768889661080 0.6352917284688789 0.6757626257100467  
0.4975789891506450 0.4730256379715771 0.7568021300080032  
0.3925446794478412 0.6635229679180797 0.8058022933824839  
0.4298903581292964 0.6147194116548700 0.8132244658854679  
0.6068266143550340 0.5693130664330445 0.8290824514156435  
0.6575870070008322 0.6042577780886725 0.8293437054488230  
0.5023001506225577 0.5277204563489271 0.7573284793883635  
0.6433463472424558 0.6251702429437110 0.6960026198976483  
0.5919859920441363 0.5916836518793654 0.6964509214014271  
0.5704002314310951 0.3865808843325596 0.8156545543927448  
0.6076711013712482 0.3376544889005703 0.8084803683797910  
0.3541378186552701 0.3789753394008997 0.6886142317097291  
0.6272284720501203 0.3649029608081619 0.6779170372093798  
0.5903411612291697 0.4140831334877700 0.6856944164806247  
0.4041667511851106 0.4146619483374032 0.6884089648182549  
0.1879271956512515 0.2812618441047351 0.7589137983433727  
0.7364012769008925 0.2008451255172435 0.7395975562157643  
0.6916395630957609 0.6390003030223136 0.7288135919897801  
0.7504139034718962 0.6666794469025424 0.8424364055981566  
0.7993593592730109 0.7032391583049975 0.8272851861289465  
0.8067889041557006 0.7275857246476531 0.7546996560069847  
0.7658152580927068 0.7147250791881463 0.6977635849217706  
0.7182547712279714 0.6783734378556464 0.7124657904176788  
0.6488735664195479 0.3110654037324916 0.7695291014843569  
0.6527518867819093 0.2399948299884174 0.6703985413078321  
0.6919054178444707 0.1932448015143940 0.6855751064979294  
0.7024466269436214 0.3015134021420610 0.7634047976474552  
0.7415727855145769 0.2552527483308060 0.7781984245326899  
0.3093858631316894 0.3585893261535561 0.7247891839440941  
0.2592413825366536 0.3548981602103553 0.7191847545168646  
0.2063091693424957 0.3258353018877445 0.7085006924269874  
0.2766507322541273 0.2967918649135433 0.8328091894572255  
0.2233597166654446 0.2662495595962831 0.8210638734862276  
0.3511889223604945 0.6898653569861437 0.7669134798638273  
0.2975200858578645 0.6996075046215552 0.7607897965176507  
0.2586094523996797 0.7461314261495916 0.7752670699537101

|                    |                    |                    |
|--------------------|--------------------|--------------------|
| 0.3475778916397098 | 0.7605603915498977 | 0.6675222790817575 |
| 0.3087485411436432 | 0.8076243973344116 | 0.6824988350866948 |
| 0.2640924725911246 | 0.8003913502676366 | 0.7364339033640710 |
| 0.6290186713814986 | 0.5203889667419079 | 0.7618584992489555 |
| 0.3483793257448435 | 0.3877669328851605 | 0.8252263175096053 |



N-CENTERED PENTAMER

|                     |                     |                     |
|---------------------|---------------------|---------------------|
| 1.0000000000000000  |                     |                     |
| 40.4128619999999970 | 0.0000000000000000  | 0.0000000000000000  |
| 0.0000000000000000  | 40.3914600000000021 | 0.0000000000000000  |
| 0.0000000000000000  | 0.0000000000000000  | 38.2582340000000016 |
| C                   | H                   | N                   |
| 360                 | 250                 | 40                  |
| O                   | 20                  |                     |
| Direct              |                     |                     |
| 0.1801304699407043  | 0.5808475462299890  | 0.2187421507456912  |
| 0.1971060956837054  | 0.5326360105819103  | 0.2680067218237177  |
| 0.1639378794854923  | 0.5388637344531066  | 0.2604716372826625  |
| 0.5451109140031845  | 0.7454166106122665  | 0.1916129168574217  |
| 0.5446625500698596  | 0.7817662265910520  | 0.2000648980716093  |
| 0.5285294513776245  | 0.7954544609156952  | 0.2291634697337226  |
| 0.5278325166215853  | 0.8297510979240166  | 0.2338580158632993  |
| 0.5601225973702845  | 0.8029634422827738  | 0.1759828437639821  |
| 0.5598071032690499  | 0.8371142088105769  | 0.1810134670539685  |
| 0.5435204905437375  | 0.8506287270224707  | 0.2099404592043053  |
| 0.5443120906350478  | 0.4021955639110999  | 0.2251410086066438  |
| 0.4565983066769437  | 0.4383271008433643  | 0.2199918509977980  |
| 0.4261407920961035  | 0.4853459539359749  | 0.2206353050697306  |
| 0.4038080927123011  | 0.4577174339667490  | 0.2208473900247377  |
| 0.4223074871296159  | 0.4291906664086080  | 0.2202085483384150  |
| 0.5776806856110720  | 0.5149789325324063  | 0.2273086885350920  |
| 0.5474285218402044  | 0.5620082123252426  | 0.2231711976781423  |
| 0.5817080348737939  | 0.5710807304243487  | 0.2247565510531756  |
| 0.6000549008708967  | 0.5425642712414602  | 0.2276032290895065  |
| 0.4409082898949435  | 0.5455218028136252  | 0.2215822081545118  |
| 0.4311095058274867  | 0.5802342230706534  | 0.2210236489395879  |
| 0.4596009959416003  | 0.5981038930336275  | 0.2201763689477370  |
| 0.5628654647150761  | 0.4548034133265668  | 0.2278064158266359  |
| 0.5173248643618467  | 0.4261309401067241  | 0.2236391612859417  |
| 0.5726936586940756  | 0.4200731692786127  | 0.2278826898035741  |
| 0.4866298879446666  | 0.5741654842810743  | 0.2203600111294470  |
| 0.5203020232680449  | 0.5836890512282482  | 0.2208684441904555  |
| 0.4179190804519223  | 0.5191764283185868  | 0.2217852641135807  |
| 0.4837466179384431  | 0.4166249185992621  | 0.2211754022495277  |
| 0.5858034079691780  | 0.4811623585782475  | 0.2292931971377327  |
| 0.5276766383248925  | 0.6199732468500421  | 0.2196240330568929  |
| 0.5250619389005032  | 0.6377743999852645  | 0.1882657330240885  |
| 0.5298039088174570  | 0.6719521607647753  | 0.1869551889527408  |
| 0.5368393350940613  | 0.6894479193464136  | 0.2178527647335348  |
| 0.5401580882513194  | 0.6717981978147991  | 0.2493251251627880  |
| 0.5358965619493921  | 0.6375913998172071  | 0.2500219097083784  |
| 0.6217054755503097  | 0.4730014457789827  | 0.2335435742952079  |
| 0.6342396830363041  | 0.4630702635452070  | 0.2661111770318881  |
| 0.6677561637195776  | 0.4562122954574989  | 0.2710628806247615  |
| 0.6896845042818338  | 0.4589621334501384  | 0.2428344174842035  |
| 0.6774324373430037  | 0.4683154397171182  | 0.2099404912126123  |
| 0.6439480113967970  | 0.4753392793170746  | 0.2054591830428643  |
| 0.4760906803520366  | 0.3803735946968601  | 0.2209447234692093  |
| 0.4758285890219351  | 0.3622196474848469  | 0.25221442039000884 |
| 0.4703286753324716  | 0.3282291424294760  | 0.2522931410516935  |
| 0.4647895490634618  | 0.3112244522014816  | 0.2207472598386181  |
| 0.4640066927931558  | 0.3292259905289704  | 0.1892860153944619  |
| 0.4696958259158872  | 0.3633136649612887  | 0.1897752383260504  |
| 0.3818574418026353  | 0.5271017356085225  | 0.2240896472487982  |
| 0.3606095533037439  | 0.5223278900270805  | 0.1954894613151774  |
| 0.3267989691466208  | 0.5283628450981257  | 0.1983937263286895  |
| 0.3132130246546982  | 0.5391412416887392  | 0.2301914830405917  |
| 0.3341400561872103  | 0.5445318522367539  | 0.2588394243817925  |
| 0.3680045754356937  | 0.5386489355921024  | 0.2554666391544829  |
| 0.1553652035833081  | 0.5629466268524961  | 0.2358294982746345  |
| 0.74425906624617152 | 0.4530096108359208  | 0.2741365640332702  |
| 0.7796135196663529  | 0.4437285531140318  | 0.2669861868045793  |
| 0.7975756207424062  | 0.4287973575371323  | 0.2941213083891458  |
| 0.8304212495855228  | 0.4194200139203723  | 0.2890474448526829  |
| 0.8459307786606041  | 0.4253146705480940  | 0.2569876548731115  |
| 0.8284411328936222  | 0.4407271843270346  | 0.2300132879025601  |
| 0.7954422316710622  | 0.4497802553150442  | 0.2349241466465656  |
| 0.4528149934972723  | 0.2550597926338584  | 0.1962165917448020  |
| 0.4544775525791833  | 0.2188133972391322  | 0.2050551089580303  |
| 0.4369487278566406  | 0.1971710465209035  | 0.1830873989728295  |
| 0.4382216250492117  | 0.1630836048278325  | 0.1884059869778650  |
| 0.4736037542410558  | 0.2056136460528223  | 0.2323290761605448  |
| 0.4751974934924248  | 0.1713848640925115  | 0.2373093416835896  |
| 0.4574862464323626  | 0.1500701487892399  | 0.2154878495682546  |

0.2574605528946441 0.5423953922595627 0.2593454871800514  
0.2221282258390335 0.5500658323174235 0.2505088372080639  
0.2133672607066678 0.5743582528330555 0.2259099516390719  
0.1739409613499267 0.5447228397168206 0.3612398921493041  
0.1931549549698195 0.4887196212197074 0.3989888968520232  
0.1596865904440065 0.4951875686483491 0.3934299025182659  
0.5092784697838119 0.7493204577996199 0.3339626851106815  
0.5054956177770628 0.7855610023113389 0.3415899488811199  
0.4787879530434034 0.7982296201729721 0.3608253149070642  
0.4756122699404832 0.8323362346638633 0.3658296514711059  
0.5290696902877374 0.8074398962242684 0.3277609713361908  
0.5262610653439830 0.8413992555234187 0.3335092301263241  
0.4994005633497443 0.8539479505825870 0.3523834120488323  
0.5631608814303146 0.4133001478818017 0.3697282541306744  
0.46977666424547671 0.4304888133834499 0.3658376603658618  
0.4308667757730330 0.4708185448441762 0.3656097974355153  
0.4142585444454949 0.4394330095778879 0.3652786162514954  
0.4378673752483098 0.4149774663022806 0.3649175545006237  
0.5726077129946033 0.5307779670126352 0.3695070610879022  
0.5337560571807292 0.5709917287014759 0.3656561658939929  
0.5656102952074701 0.5865709267896816 0.3668523237786119  
0.5891524850422702 0.5621961346030158 0.3696613365237386  
0.433195772637910940 0.5328754697231874 0.3646254669390960  
0.4163294852199593 0.5647444403307624 0.3629436534605353  
0.4404086997341525 0.5882056363042802 0.3621375844807997  
0.5703038181778444 0.4686912402807404 0.3706043266659020  
0.5317678246540815 0.4309678997703628 0.3677544737112037  
0.5871809067522656 0.4367942896529684 0.3711897292619430  
0.4718378061881734 0.5705149295444026 0.3629865740677263  
0.5028082682620145 0.5867958746151433 0.3633138897937863  
0.4160852157569623 0.5023575701618074 0.3654436713039418  
0.5008140418895450 0.4146651055939422 0.3663022209504793  
0.5873761795449863 0.4992694243671253 0.3713859650547439  
0.5030033531283339 0.6237182102763130 0.3618808689812394  
0.4919046096177683 0.6407634957173038 0.3320920428889104  
0.4914219412273045 0.6752503934016421 0.3308547068126990  
0.5017431447831315 0.6935910230385198 0.3599845567376164  
0.5128496160851478 0.6769438496483202 0.3899047433477302  
0.5136574551877242 0.6424872437842049 0.3906431743806407  
0.6241970112863420 0.4982301496801330 0.3739479531613337  
0.6398957484749638 0.4850224640651797 0.4035965883902876  
0.6742447602132416 0.4828172157869804 0.4058216991948568  
0.6938377009263590 0.4937198696964605 0.3778944699265255  
0.6785700520827548 0.5073240366912712 0.3482984261608941  
0.6442340809009685 0.5096476325910021 0.3464831813829677  
0.5007789074487445 0.3777438191137480 0.3655997061687477  
0.4873192799206127 0.3592984257562052 0.3932636691987280  
0.4882588073489895 0.3248234455897602 0.3930996775625847  
0.5023671637711602 0.3078521705995725 0.3648650371002236  
0.5156196679128970 0.3258684788994465 0.3368682772513925  
0.5149516153068542 0.3603486167457334 0.3375139438531918  
0.3791552051419800 0.5034070236886754 0.3660552788180153  
0.3603564512128055 0.4924487749654794 0.3374493820328405  
0.3259274955329523 0.4942755148966383 0.3378395257618079  
0.3094028576915130 0.5068956938898159 0.3671532785502822  
0.3277798822809894 0.5175477512885321 0.3960817719283210  
0.3622137952320221 0.5159276917554788 0.3952701216365882  
0.1499862085737718 0.5232892876039447 0.3746763201016130  
0.7495822121722310 0.4940996388521011 0.4054155931692411  
0.7856930445563215 0.4889088730498996 0.3979332922688436  
0.8058216931664390 0.4779726415755260 0.4255052723242805  
0.8396414143090793 0.4732195349862980 0.4204385094378358  
0.8538909464950527 0.4798629163612669 0.3878817922052150  
0.8341052434625637 0.4911238972641589 0.3603969517542787  
0.8001557649318226 0.4954794758499573 0.3653004886846024  
0.4959542204966023 0.2521728787623718 0.3388497042163218  
0.5002673090567654 0.2159343403454704 0.3461422997778102  
0.4775527248800793 0.1937089103660683 0.3313582579984331  
0.4810529088731666 0.1597495638879501 0.3366484381148322  
0.5268126484061988 0.2036191074645845 0.3658726633699871  
0.5306989585886354 0.1695312643575649 0.3704315023229375  
0.507758638826154 0.1475593631118277 0.3560300320406566  
0.2530358660466028 0.5024544828429595 0.3925800520960190  
0.2173507756891780 0.5098968872855031 0.3851505656993423  
0.2075056783280531 0.5379398722849873 0.3661601570807401  
0.1679722536983171 0.4817240625340091 0.4918934719693803  
0.1986089557712341 0.4324016658053422 0.5315148259386141

0.1646274331379571 0.4310870368003274 0.5254658785251219  
0.4637416141538229 0.7474417929005225 0.4676023819236843  
0.4516471307466172 0.7819316786428935 0.4745805225774232  
0.4235571062938959 0.7884105240527695 0.4950325540761657  
0.4123524978285051 0.8208669571831220 0.4993280865886895  
0.4684290393999884 0.8083884616721623 0.4587596593326698  
0.4575853449494373 0.8408103656778769 0.4636875142492371  
0.4293978013431519 0.8471247604476420 0.4838315330046474  
0.5741012987892479 0.4250781182762349 0.5025782014227573  
0.4791295208775602 0.4272041607780599 0.5010671630966737  
0.4341250150442553 0.4605903010230352 0.5013485050113258  
0.4228893194306713 0.4269107035179315 0.5015112793931206  
0.4501897768086696 0.4066644543365550 0.5008891667338075  
0.5648416076670382 0.5424627437888375 0.5032684651096097  
0.51981993025493546 0.5757392447644909 0.4999835968568639  
0.5487403073770843 0.5963198409209721 0.5005876816889375  
0.5760100468874075 0.5761553136866729 0.5030695421028685  
0.4263359076874289 0.5221405825483231 0.5003379429232913  
0.4046630665956252 0.5509567338517255 0.4989449421325824  
0.4247630506397471 0.5779134510821813 0.4979346529161331  
0.5725068504355457 0.4808915190517527 0.5041006241862106  
0.5402946276206566 0.4376189004285426 0.5016063437431637  
0.5941745532217163 0.4520279021817191 0.5038873103551466  
0.4586086022922342 0.5653840415616482 0.4983083124922419  
0.4866759315085471 0.5863326722722438 0.4980940957081346  
0.4143353205139729 0.4892674085597987 0.5011655375635046  
0.5122997353493993 0.4166226688082776 0.5007302259197588  
0.5845734594483041 0.5137733769006101 0.5048300701410423  
0.4809246581841944 0.6228024359869619 0.4963669420421363  
0.4664448008949115 0.6374492765034562 0.4667723672880019  
0.4601064944955013 0.6713336749936052 0.4653356190734197  
0.4678379355864110 0.6914596358944641 0.4940274989740245  
0.4824720676747878 0.6772669435002280 0.5236585132200484  
0.4890875495283649 0.6434379593222125 0.5246164703171206  
0.6211475258886007 0.5185199611207905 0.5068551392915088  
0.6391085806856914 0.5076223724484015 0.5361293064604444  
0.6734199178103070 0.5106664919934344 0.5378151257185849  
0.6907663134493671 0.5245741110436275 0.5097047667481109  
0.6731866392169695 0.5358286087336276 0.4804463752752182  
0.6388519557108594 0.5329841227726014 0.4792056161383520  
0.5182323297053134 0.3801576700885537 0.4995779922500179  
0.5097705080108194 0.3596706597872724 0.5278414103567237  
0.5166569527424136 0.3258721121369070 0.5272276812705005  
0.5318765965369207 0.3116224040162224 0.4979611976293080  
0.5399486320552032 0.3316294035206469 0.4692827836078111  
0.5333121767279586 0.3654528557809489 0.4703557573233175  
0.3777671112976073 0.4840258154214382 0.5011795516709444  
0.3618959911271463 0.4694789263892484 0.4723676966572752  
0.3277331401582234 0.4649416156332462 0.4719357035681538  
0.3085593323387743 0.4745201517746296 0.5007201825874734  
0.3240288859189638 0.4888260565717821 0.5298080495310069  
0.3581790245506213 0.4936410921680141 0.5297664010202250  
0.1491836465020844 0.4558592644254871 0.5058053329356694  
0.7457187012100316 0.5345508777119279 0.5366551113562555  
0.7822476853924920 0.5351144645788160 0.5294168196052258  
0.8036540286515622 0.5300367379154548 0.5578075821940659  
0.8378436530956027 0.5309010757659210 0.5531393575226459  
0.8511181214426248 0.5373613163749115 0.5200876757327723  
0.8299992540364339 0.5427424829724923 0.4917375865469934  
0.7957461145826527 0.5414648967434504 0.4962725718554848  
0.5362564455135684 0.2557231303074197 0.4716760468273392  
0.5483014342713365 0.2212211192850003 0.4785070927521082  
0.5314324743510679 0.1948571090344073 0.4626179556245757  
0.5422777129212557 0.1624103377543342 0.4673008017034173  
0.5764821111861331 0.2146495346750931 0.4987780396200724  
0.5876965829788476 0.1821736894636940 0.5028077780378790  
0.5705599926431061 0.1560015958967293 0.4872576319142009  
0.2540070600761192 0.4589024643788695 0.5253155924169841  
0.2176910370611128 0.4580799362416920 0.5172523491286110  
0.2021429541372279 0.4826976362356810 0.4972548397307406  
0.1757757117049292 0.4234970354277398 0.6232576300907261  
0.2143550077588709 0.3806730446838409 0.6635482252122784  
0.1812613335500425 0.3731689824511978 0.6570365578800689  
0.4210991776972998 0.7359160537624023 0.6003025626445350  
0.4036498429279552 0.7679741371421653 0.6075465207505479  
0.3746447738354930 0.7696246010522677 0.6276506766600127  
0.3585311640365014 0.7998689641533442 0.6324698102257578

0.4162858639908134 0.7970095177065476 0.5924817114790562  
0.4004967561100815 0.8272622345232908 0.5978801362589820  
0.3714964254133672 0.8287494489500354 0.6177787149497790  
0.5864234719525840 0.4384093196240220 0.6349454407246751  
0.4926189332889718 0.4231182756209282 0.6327490889136393  
0.4422691065850963 0.4476991823456559 0.6329834977977890  
0.4373645873054334 0.4125393081276203 0.6328767273797712  
0.4679039482644593 0.3976275381266030 0.6323035333224957  
0.5558280747887753 0.5521178493174561 0.6350665630088204  
0.5055253548674602 0.5766515230327212 0.6321589009076111  
0.5302236268039545 0.6021542783553613 0.6327300165439272  
0.5607096000675040 0.5872787384919810 0.6349612441221224  
0.4234473570291023 0.5068178266103535 0.6326466514175016  
0.3968750728121218 0.5312049135538015 0.6316202843203872  
0.4117049355571704 0.5613846803392669 0.6307387871065189  
0.5746470145680509 0.4929914970849904 0.6361058480850210  
0.5508952724369990 0.4445595976158302 0.6337518703239634  
0.6012358990490445 0.4685855261161715 0.6361305912198285  
0.4472582234784024 0.5552419695832189 0.6308682321905429  
0.4709980310909049 0.5809692490400601 0.6305581848938027  
0.4176073781667692 0.4722987176440352 0.6331211006507539  
0.5271785922427881 0.4188274553726820 0.6326884902896838  
0.5804642507895069 0.5275301900734652 0.6365801244744236  
0.4587073077136796 0.6157760559487280 0.6289452109824308  
0.4420793433275578 0.6277474074259345 0.5992733808208975  
0.4300239755666718 0.6600507850211332 0.5978118006517912  
0.4341129124475023 0.6811672785524802 0.6265381794323636  
0.4507729725549044 0.6696368042356284 0.6562739872640255  
0.4629967524927414 0.6374179757182761 0.6573040903114462  
0.6154977945710995 0.5390481738549278 0.6381046180881911  
0.6354659943619637 0.5322193023916933 0.6672924355119187  
0.6685753240132690 0.5417781304690247 0.6684109288433314  
0.6826443127661606 0.5582802250026240 0.6398228162793794  
0.6629690661114335 0.5655149252802606 0.6106563533111217  
0.6298033785511141 0.5561812397688823 0.6099749109175513  
0.5396090737517200 0.3840646925681410 0.6316273350365593  
0.5344884387095308 0.3623620570101216 0.6597717939737545  
0.5469777747133504 0.3302233795261453 0.6591569407779448  
0.5647692338624898 0.3189116123581058 0.6300775749895610  
0.5696851020709028 0.3401004744205623 0.6015599446332226  
0.5573272434465762 0.3722829196354074 0.6025789782430842  
0.3825460180920336 0.4606630057518442 0.6333043676900265  
0.3689985047851256 0.4442440177806761 0.6042972456439940  
0.3360065419892350 0.4342708825563003 0.6040001886468414  
0.3157362356193832 0.4401193614569301 0.6330810466622095  
0.3289826781302052 0.4561379014114804 0.6624210784302154  
0.3619136389577344 0.4663918534283066 0.6622297091546038  
0.1618230289973011 0.3946921800028369 0.6370628120096711  
0.7345567112870708 0.5795121642625172 0.6659444062844243  
0.7702692265707397 0.5869319315000217 0.6583483777663893  
0.7923251232212067 0.5871166400523925 0.6866847501119620  
0.8256721070546387 0.5944913863273554 0.6816257033461104  
0.8373515866978851 0.6022553109172760 0.6482198860535755  
0.8155202745077544 0.6024185605499064 0.6199038218460423  
0.7821849695897631 0.5946439132305311 0.6248462657663103  
0.5786964054982727 0.2644318724946241 0.6040623248271231  
0.5965124848126840 0.2326007949557318 0.6113598761624434  
0.5842474328648184 0.2034023751357207 0.5963179696019114  
0.6004654391069293 0.1733788420646018 0.6016953290928020  
0.6255531914833172 0.2313664967575533 0.6314339645586953  
0.6421236973801974 0.2013603853316440 0.6361855326706394  
0.6295445670062629 0.1723072555009552 0.6214977876564406  
0.2641052923488239 0.4167123709788059 0.6579679531160753  
0.2286263629317246 0.4093532254035145 0.6493755190540341  
0.2091448825075074 0.4306639265331505 0.6290055178877825  
0.1911995543771536 0.3748940631614868 0.7571775996068855  
0.2249811839027976 0.3535759295467214 0.8166199648841104  
0.1929170061473279 0.3424562287751257 0.8102631581654099  
0.3871646149030916 0.7215643884902082 0.7351687528793955  
0.3700920871132595 0.7534811518886777 0.7439069269512000  
0.3452772906990699 0.7556363448990944 0.7695242680512270  
0.3299237668406089 0.7858767039459275 0.7765195284747990  
0.3790501781314559 0.7820058668572540 0.7252683222453437  
0.3639732499935248 0.8122533028090165 0.7326081834221360  
0.3393867720564735 0.8142728419714518 0.7582306505106248  
0.5941056906704344 0.4533314559976268 0.7786661622262869  
0.5042622107843742 0.4224557424003993 0.7781004397718828

0.4506684987335914 0.4387473085671555 0.7788030816609171  
0.4513736240115697 0.4032610009242416 0.7783080368752523  
0.4838857151222933 0.3933571099437098 0.7775385422009156  
0.5447311067846869 0.5602867746854552 0.7788686362414032  
0.4911621386100322 0.5765328151011659 0.7762609111870067  
0.5115301947139035 0.6056343909398062 0.7759995094953266  
0.5440112231453547 0.5957648243542987 0.7779193100495002  
0.4223213072095209 0.4939422769667468 0.7777633940624782  
0.3919164527234741 0.5133356413260467 0.7763711480872751  
0.4013014353023708 0.5456147700382457 0.7748358340340036  
0.5730920042054214 0.5050722115398432 0.7801283801223109  
0.5580434672824167 0.4532598281313188 0.7782875698921090  
0.6034982294619443 0.4856215714578451 0.7797207570801771  
0.4373726329313543 0.5457310129096260 0.7752670394737392  
0.4563963205324900 0.5750824859658662 0.7745985116245189  
0.4223703977929358 0.4589600627320459 0.7786998971351223  
0.5390445955153887 0.4239075006661328 0.7774392438981504  
0.5730477921435631 0.5400880511885550 0.7800999228738320  
0.4387484357912969 0.6074814912763399 0.7716476835433594  
0.4232813572640078 0.6169099965353250 0.7403241227060869  
0.4077468001886819 0.6475617023267075 0.7366309484068478  
0.4072210093599247 0.6696576759182042 0.7648700738271604  
0.4219865353729564 0.6603141556645902 0.7965931441109891  
0.4375799192206088 0.6297309286619748 0.7998335316865000  
0.6058741115547912 0.5571719511496325 0.7800096792349794  
0.6257941729626940 0.5584202887038645 0.8099994997165763  
0.6572673759912048 0.5726414888340776 0.8095820699204720  
0.6698407917482110 0.5858403251691591 0.7782560873078891  
0.6498583458751881 0.5851803798844435 0.7481655060184138  
0.6183679215954714 0.5713103062878219 0.7491937481455617  
0.5567728582071904 0.3915330162260154 0.7749033399199667  
0.5574779259756268 0.3691846067087209 0.8030077672069578  
0.5731769864963061 0.3386318817782603 0.7999135214156802  
0.5885129575978635 0.3294760463840699 0.7684379023514183  
0.5884180832217335 0.3516698089134207 0.740282328404563  
0.5727772084514211 0.3822642168622493 0.7438266129090573  
0.3895561245901881 0.4417928837113653 0.7787726794409436  
0.3760148086567041 0.4290217861837784 0.7478076284254808  
0.3446775706685078 0.4146954671799883 0.7474066813051602  
0.3260276266932164 0.4123157644895970 0.7783188043209497  
0.3396511239513142 0.4242293691326585 0.8097165891408308  
0.3708962030064143 0.4389002978774815 0.8095189277813497  
0.1758700422844429 0.3532136191361711 0.7805524723379125  
0.7226881235265720 0.6094196290750139 0.8012310649140786  
0.7538723697886721 0.6267243002689444 0.7898642857751577  
0.7793732396371318 0.6289625487339277 0.8146915822470330  
0.8086879867820830 0.6455286568516657 0.8068771431021919  
0.8128248734669247 0.6604770570775941 0.7741924015614015  
0.7875117067749106 0.6586102601118595 0.7494196263436188  
0.7582163002931976 0.6417732796739820 0.7571121802801591  
0.6091615184277904 0.2778254096195388 0.7387889680342532  
0.6267714273958835 0.2461853023702792 0.7474171662458603  
0.6184533994249206 0.2175949111037926 0.7285664680755736  
0.6340955275357093 0.1876103774289294 0.7357931843848177  
0.6515449098149253 0.2443949882805012 0.7731109720566373  
0.6674505155934253 0.2144255316262210 0.7800052723033021  
0.6585941500141864 0.1859350582753500 0.7615343784579328  
0.2747842211419850 0.3868061016815736 0.8028682646258217  
0.2407018577456592 0.3751299018584817 0.7930822052123726  
0.2235523376591527 0.3856655391300294 0.7631819247707281  
0.4058612419831468 0.5894909317117546 0.2210725393248018  
0.3841079246339155 0.5427485613544570 0.2779773042545456  
0.5416286091810174 0.3754544716510373 0.2239443489289106  
0.3770387622650251 0.4597478274862788 0.2215683768542097  
0.4134267775883634 0.4038277056410519 0.2203554783012267  
0.4623166739933952 0.6248556062914939 0.2195397428280667  
0.5906889490138212 0.5963959351094570 0.2238944823595478  
0.6267719706510761 0.5404866653403705 0.2295401710614133  
0.5188815852758417 0.6245793560625255 0.1642119200218093  
0.5279532488205709 0.6852376991343528 0.1623219850351157  
0.4787195200512591 0.4864022105985089 0.2206814416145512  
0.5453278452204822 0.6852166132435833 0.2735180106454649  
0.5382537000554969 0.6244081148636138 0.2748102841427698  
0.6173494533137770 0.4607830726033293 0.2882631965193114  
0.6769360959383449 0.4489883468639206 0.2966781095081117  
0.5251543670550143 0.5140166020012985 0.2242724553486590  
0.6943294695921333 0.4703466862136894 0.1877108714700802

|                     |                    |                    |
|---------------------|--------------------|--------------------|
| 0.6348475725220463  | 0.4827371343712596 | 0.1797502123299842 |
| 0.4801283213047081  | 0.3749652629031668 | 0.2769465490282167 |
| 0.4707889239103555  | 0.3144624334841776 | 0.2768994406045979 |
| 0.3106568208646893  | 0.5243332817076779 | 0.1758436197939963 |
| 0.4591814156781010  | 0.3163538361673179 | 0.1648602051619056 |
| 0.4695822285176783  | 0.3768989332067282 | 0.1650817684588182 |
| 0.3707589352934471  | 0.5136839240666665 | 0.1706696681916250 |
| 0.1293725351086834  | 0.5679001164119816 | 0.2300750573470321 |
| 0.4588329962299850  | 0.1233259944872269 | 0.2194578934759874 |
| 0.7349339640527011  | 0.4450889434510406 | 0.2226833720855687 |
| 0.7852854867356996  | 0.4246014966065277 | 0.3191228831566512 |
| 0.8440088865346799  | 0.4075057664784414 | 0.3102599483794647 |
| 0.8716854828833988  | 0.4180541939898597 | 0.2530595608846387 |
| 0.8405672679766784  | 0.4458918915208765 | 0.2051068733536733 |
| 0.7824678404086972  | 0.4625651544279736 | 0.2137867542555118 |
| 0.4653665554038714  | 0.2668040011558439 | 0.2468790908566658 |
| 0.4226576276329881  | 0.2078584651774666 | 0.1616801540279524 |
| 0.4243286611873691  | 0.1465467438526806 | 0.1712417620959337 |
| 0.4879091581542310  | 0.2216756403263922 | 0.2496589950754731 |
| 0.4905227653582510  | 0.1614107810638442 | 0.2583106299592226 |
| 0.2676102548522870  | 0.5474185290272764 | 0.2077243218609953 |
| 0.2325162838592036  | 0.5890628347954582 | 0.2130269049137671 |
| 0.1735659394216566  | 0.600075077230075  | 0.1999272288228856 |
| 0.2040383373507094  | 0.5141444814711318 | 0.2874564013473397 |
| 0.1446709118403548  | 0.5248823456770920 | 0.2739715587181236 |
| 0.5384616221289630  | 0.7341063705331274 | 0.2437492924604098 |
| 0.5158871343083931  | 0.7796959926154434 | 0.2481694465855391 |
| 0.5147994315863118  | 0.8401280361070096 | 0.2563186782383977 |
| 0.5720615364074754  | 0.7918950324438985 | 0.1532265988928574 |
| 0.5721006848189835  | 0.8533015121548007 | 0.1621941255021820 |
| 0.5429091009437926  | 0.8774233348514565 | 0.2137317131547243 |
| 0.5979079595027957  | 0.4108371281461779 | 0.2294363939430346 |
| 0.3239317564063701  | 0.5528529003783976 | 0.2836474821875851 |
| 0.3897284275557266  | 0.5685558852354957 | 0.3625313186068070 |
| 0.3763578212884226  | 0.5245884387546034 | 0.4178000835915183 |
| 0.5663412939267193  | 0.3866062697749879 | 0.3699552785767522 |
| 0.3875942004898982  | 0.4362913256310068 | 0.3649982424286767 |
| 0.4338143156720192  | 0.3884363267940724 | 0.3640968241156813 |
| 0.4373149429533225  | 0.6148956057712865 | 0.3610843146840400 |
| 0.5696494982645665  | 0.6131092041702885 | 0.3658229071772792 |
| 0.6157486385616097  | 0.5654242003759434 | 0.3715014175805087 |
| 0.4834115826886767  | 0.6266989365710051 | 0.3094313508873346 |
| 0.48292802029183062 | 0.6879522638473314 | 0.3074067919006681 |
| 0.4825175672861336  | 0.4816574717218772 | 0.3664957348265802 |
| 0.5202421150503707  | 0.6911911563808825 | 0.4128572513584133 |
| 0.5220942191983898  | 0.6298551243954362 | 0.4142388324548479 |
| 0.6248104248985176  | 0.4761751795270429 | 0.4253505723246502 |
| 0.6858758840293278  | 0.4725765712756739 | 0.4290950091651953 |
| 0.5210387707054793  | 0.5198186587192019 | 0.3667683513484447 |
| 0.6937640507431236  | 0.5154915315958130 | 0.3263493348405413 |
| 0.6326844909570435  | 0.5198675181163835 | 0.3230529940170043 |
| 0.4765910864573863  | 0.3722064234417013 | 0.4156254463449656 |
| 0.4785954710372737  | 0.3108295492597680 | 0.4152608886118441 |
| 0.3116599271701131  | 0.4864030924384877 | 0.3150918485010509 |
| 0.5266529380802109  | 0.3128556198611280 | 0.3148116512922746 |
| 0.5258476936686310  | 0.3741851169771006 | 0.3158664030874083 |
| 0.3729360211523692  | 0.4828029812420708 | 0.3143370296652436 |
| 0.1237471471830810  | 0.5285443259740946 | 0.3706864384906677 |
| 0.5107329094289660  | 0.1209168737625715 | 0.3597618497747140 |
| 0.7385117385781910  | 0.4829371282995967 | 0.3540817461564056 |
| 0.7944519134996098  | 0.4733375292918758 | 0.4508977092765942 |
| 0.8549748914796732  | 0.4644583920523983 | 0.4420395730938325 |
| 0.8804309593579146  | 0.4763826578374299 | 0.3839627391073589 |
| 0.8451171891732177  | 0.4965953743573416 | 0.3349893865506670 |
| 0.7851242299531349  | 0.5045744457494901 | 0.3436083948187960 |
| 0.5083233509067169  | 0.2627694627986051 | 0.3901853687503907 |
| 0.4572256611810968  | 0.2034949748982612 | 0.3156816180858336 |
| 0.4629812789505605  | 0.1426869721879428 | 0.3254300319319180 |
| 0.5448288509373957  | 0.2206347793151247 | 0.3772704318006391 |
| 0.5517453025200958  | 0.1601861631785378 | 0.3853462849034641 |
| 0.2648041425298559  | 0.5160738918961417 | 0.3421028948560975 |
| 0.2260769954464200  | 0.5548656805764604 | 0.3556400601603354 |
| 0.1665360871100592  | 0.5668476362570903 | 0.3468371492306750 |
| 0.2010099443666080  | 0.4672356523167596 | 0.4141563416838893 |
| 0.1410642758217260  | 0.4783128653851025 | 0.4039353410640098 |
| 0.4953457046471456  | 0.7388116011146622 | 0.3846901458759738 |
| 0.4601032923914792  | 0.7815134072418566 | 0.3714965530353977 |

0.4544455268413731 0.8419817194809955 0.3803390236020152  
0.5495360322459653 0.7973807963720796 0.3124824662621786  
0.5449985506650569 0.8581725093160731 0.3230498958777021  
0.4969747184952902 0.8805941851832885 0.3564903990784982  
0.6137381622461038 0.4329312407906086 0.3725932588276178  
0.3151407198241613 0.5271633319085745 0.4190900600644319  
0.3777887573575880 0.5505155671509672 0.4988740235613076  
0.3699953311522025 0.5049631381636979 0.5524786270603373  
0.5814103916616299 0.3992077285103279 0.5022099688608290  
0.3971018329614512 0.4194379201650099 0.5017983589183047  
0.4505578117591887 0.3798049831267866 0.5005087332634053  
0.4174727020745314 0.6037779280976977 0.4969980784637602  
0.5483812942657708 0.6231575295370427 0.4994555592338206  
0.6017488474606821 0.5836948971308765 0.5044290560668044  
0.4599543054989411 0.6219193419469244 0.4444442279034762  
0.4490269436239187 0.6821817112408060 0.4420502551000418  
0.4832028438148893 0.4798476391817457 0.5012808317065535  
0.4878989574576560 0.6927786258751967 0.5462991453762914  
0.5000951129733119 0.6326530741602402 0.5480518166150199  
0.6258675425136883 0.4964198492933439 0.5580146340182058  
0.6868016727551076 0.5021935791706840 0.5608325321433645  
0.5158557834543402 0.5230775512013661 0.5013971087554244  
0.6866697310743256 0.5461980777327706 0.4582872889518489  
0.6255798389091396 0.5413790620086667 0.4559873450805931  
0.4982809844277241 0.3705267797186274 0.5509852840335537  
0.5108737795245806 0.3104217187616919 0.5498224835195441  
0.3156293108489857 0.4544527214628906 0.4489641390708400  
0.5514923641707720 0.3207254780242006 0.4462807491644562  
0.5400418604680987 0.3809096073443738 0.4480484615086745  
0.3765343226072158 0.4620782396482906 0.4496960908244506  
0.1224859036712322 0.4550484168964111 0.5014569242501009  
0.5793005408311176 0.1306078694347652 0.4905716407294617  
0.7364730973407198 0.5208700847195826 0.4854505419409977  
0.7929436251280030 0.5254936933150388 0.5835350930548839  
0.8541909547640247 0.5266901692446556 0.5754235513386472  
0.8779034654445144 0.5382977642201798 0.5164368789856045  
0.8401815784158088 0.5479315496930568 0.4658830075576976  
0.7797074920000253 0.5458067271295899 0.4737678407155822  
0.5468790636439966 0.2684298290532726 0.5227738910864975  
0.5097994973847157 0.2002458426418141 0.4465371623006513  
0.5287105632466761 0.1420429591573293 0.4551823410869323  
0.5900411535212011 0.2349364486119681 0.5110569941715545  
0.6099254557023739 0.1773697051357875 0.51820335504401929  
0.2635088913772647 0.4738958432953901 0.4746677171287044  
0.2166286583453579 0.5030158483337580 0.4862801801194501  
0.1560581908208181 0.5012863349351819 0.4767547226335251  
0.2108312460087774 0.4136112092783750 0.5474204605383899  
0.1500883821634449 0.4107497051290478 0.5363216275074068  
0.4528851087171889 0.7346549990879921 0.5186203086017337  
0.4100166365530367 0.7680592923138513 0.5072255861861242  
0.3901934206143543 0.8255741160706795 0.5148685646430101  
0.4900020178602408 0.8030863129610336 0.4425548286916823  
0.4710936516508107 0.8612513344189251 0.4516264668351993  
0.4206727893782474 0.8725007402971520 0.4873291719684579  
0.6210310877560271 0.4523935961138251 0.5046605325322098  
0.3093373031839578 0.4961382867440855 0.5523944702357521  
0.3705354648509676 0.5258580738820213 0.6316562036746852  
0.3718698433125107 0.4792381588076606 0.6850324567687766  
0.5983356799141314 0.4143090320722548 0.6348235967257660  
0.4133587559901123 0.4005071591555289 0.6330894542887820  
0.4731492966521170 0.3712841470327731 0.6318383921160357  
0.3998121258779795 0.5854882766752549 0.6300473943370632  
0.5250067384102814 0.6284906717622867 0.6317985847966223  
0.5846612954798899 0.5993494775988195 0.6363106390765034  
0.4385332949625851 0.6113733097375412 0.5768754628228761  
0.4173878715820043 0.6688737231879632 0.5744558479745364  
0.4870124434534535 0.4756144180247354 0.6331713802019051  
0.4535523383425889 0.6859016575797682 0.6788608425276008  
0.4756485692861492 0.6286638280440160 0.6807628565923406  
0.6248495328785936 0.5190041241673368 0.6895161535764202  
0.6836037600755217 0.5363089173792825 0.6913108946970170  
0.5111514224132309 0.5241600316630713 0.6332739477434893  
0.6740151920419276 0.5779173097931680 0.5881605925051445  
0.6149006031968015 0.5615389770532232 0.5868592105344617  
0.5209682748702120 0.3709954806003151 0.6827365388277200  
0.5435330832988295 0.3138772384862524 0.6815726371816559  
0.3255529294868982 0.4224198385736072 0.5808582549811592

0.5832289229231569 0.3314083085741112 0.5787184493285089  
0.5615039275581074 0.3887331227196754 0.5803702105700276  
0.3844190792815371 0.4398006252744046 0.5813380035605465  
0.1357716926036748 0.3890360686793723 0.6323697888445171  
0.6424600211407315 0.1488366480889742 0.6253394538412147  
0.7281443893601643 0.5624960054910634 0.6152671067107852  
0.7827649635237685 0.5815344628997722 0.7126854010172483  
0.8425623454699116 0.5943974500317655 0.7038998124209525  
0.8634263839972116 0.6082990107303876 0.6442658517069548  
0.8244240956666969 0.6086137475706177 0.5937692404373127  
0.7655423871642933 0.5950457246065339 0.6023641346529398  
0.5865146820218428 0.2789001133637020 0.6551423863397265  
0.5619080126798194 0.2046750961249056 0.5803604710144407  
0.5904837054325746 0.1507240183110292 0.5902296721162392  
0.6356160002280057 0.2539880365397695 0.6428969192054890  
0.6649496671674092 0.2007239657364219 0.6514284930843159  
0.2714861578184081 0.4319581936406291 0.6070096892762039  
0.2198853738272576 0.4531660128563679 0.6179768520307837  
0.1606951899192851 0.4405033238690125 0.6078324569142015  
0.2296150697888161 0.3644673361420932 0.6797050785979292  
0.1705151873195088 0.3505349586694864 0.6677571470803171  
0.4122566009743578 0.7213190080190520 0.6511063344956142  
0.3642459377243460 0.7471574121658959 0.6391221518317144  
0.3357455674378175 0.8008153547595259 0.6477651402797886  
0.4385880980967861 0.7954372177818774 0.5764953331466763  
0.4107663324744084 0.8497662160330560 0.5863682392623989  
0.3589388837607871 0.8524039157571415 0.6216913779168183  
0.6275680665044433 0.4738866409121965 0.6369840264415220  
0.3134863724176978 0.4606756381280623 0.6852073266318287  
0.3669441982970230 0.5033763450690232 0.7765963785094679  
0.3809791296745315 0.4485459504811601 0.8339753104420400  
0.6099398681431847 0.4315965936908646 0.7782594753636847  
0.4294793428019874 0.3876938962896223 0.7783038279507348  
0.4932172296576152 0.3681737305705713 0.7766724947593403  
0.3854656261443574 0.5673266297819347 0.7736802965717055  
0.5022194475028070 0.6308014797046834 0.7745805307866817  
0.5658740658149548 0.6113631839612406 0.7784962247115397  
0.4236811941919110 0.5999240645389569 0.7181216476199831  
0.3964262360592986 0.6544653384300642 0.7118772830840896  
0.4906743125167620 0.4733293216072906 0.7787872288001444  
0.4214738962235792 0.6772978268998040 0.8188552980517438  
0.4490781457570839 0.6229209220141908 0.8246343432876675  
0.6165631609726622 0.5477534103607551 0.8343586932442598  
0.6723128124696791 0.5735304066220170 0.8331171059305668  
0.5047494175143875 0.5256806352782653 0.7781086405516662  
0.6595153108544655 0.5951235145545817 0.7236546332957644  
0.6034203501605232 0.5707964606509566 0.7254257571405794  
0.5455439471561786 0.3758677228930212 0.8276157125060005  
0.5733371742202961 0.3215407812001488 0.8220880785152593  
0.3341712226401936 0.4057579889404703 0.7228301015040992  
0.6001769510321525 0.3448888745211319 0.7157220656509138  
0.5727085356647333 0.3993446723487104 0.7217044685724231  
0.3900517345093455 0.4307762075108973 0.7234953398180344  
0.1505842348882328 0.3448362190460177 0.7757180836499243  
0.6709159863278010 0.1624596849782887 0.7670757749492827  
0.7099588777423033 0.6016505359391137 0.7496831202922000  
0.7753499577886844 0.6175995328693821 0.8402167030403862  
0.8283642444950184 0.6469432078901672 0.8263881235617254  
0.8356944203546299 0.6736721979289695 0.7680838761612319  
0.7905149304378459 0.6703019558838210 0.7238892071004187  
0.7388205192942547 0.6408141036019420 0.7372766704388476  
0.6092320857994326 0.2878875430712313 0.7907092297724273  
0.5995383884903538 0.2192418495617292 0.7082987866392946  
0.6271660465944298 0.1654446677728591 0.7211986463515258  
0.6592675097823479 0.2666858119048912 0.7871072738741326  
0.6869577680377081 0.2133757404167398 0.7997125159949244  
0.2850906826535267 0.3963718312558829 0.7510499278241711  
0.2349035304882444 0.4027319020592254 0.7445293284897635  
0.1779353984705422 0.3836515110117736 0.7341083668573792  
0.2385312084247050 0.3460941025357920 0.8399926238847959  
0.1810656186993709 0.3254992945063420 0.8286401971847820  
0.3867611002109343 0.7113714505608272 0.7870437364116455  
0.3370892054389982 0.7334412246609302 0.7833923734533076  
0.3103693772122034 0.7872024802142867 0.7961577389705200  
0.3980102777340450 0.7801088039083800 0.7050729233138605  
0.3713983692116232 0.8343650591785643 0.7181900223274923  
0.3274800169128005 0.8379487127051615 0.7638228403707178



0.6284814695326513 0.4955304692465350 0.7801681491582233  
0.3256932878295118 0.4219273863281158 0.8338818338554742  
0.2787439448171056 0.5449226535400284 0.2314390130431276  
0.5396897517207477 0.7241663427842774 0.2192328216772715  
0.5291707961405795 0.4579209908105234 0.2251220750226062  
0.4576319468948808 0.4724084881355159 0.2199095577133378  
0.5462885126794453 0.5279520841268182 0.2246475189494840  
0.4746943372344810 0.5423845511488884 0.2210795135897408  
0.7238461239809549 0.4516493362250912 0.2455295198633624  
0.4611726782511751 0.2766245520518870 0.2226837703269524  
0.2744674528402265 0.5099397141402743 0.3660073262750675  
0.5002723492916593 0.7285981236365316 0.3607224480853686  
0.5366949497791552 0.4645542977231889 0.3683973634197661  
0.4642585574762825 0.4641201466547182 0.3660725103407074  
0.5392680360191069 0.5373870907903573 0.3672094197845359  
0.4668732261720793 0.5369634120023902 0.3644985077280127  
0.7287488321230534 0.4900933033385300 0.3776268932464075  
0.5039930463095917 0.2728329031870813 0.3659866386628131  
0.2737486104374861 0.4705260769060195 0.4989374604959599  
0.4598999647704357 0.7256141560140524 0.4947006441899429  
0.5399175975603117 0.4715596804409463 0.5025790292055652  
0.4681675418014792 0.4594737084911100 0.5013251086876455  
0.5308219776392510 0.5435031115344581 0.5015450342561083  
0.4589565085710151 0.5314817419127372 0.4998587431647581  
0.7258265236024443 0.5263611123741856 0.5090961101855478  
0.5399517503777821 0.2774909281963462 0.4988230298314584  
0.2820583847938550 0.4306435719531742 0.6313372682451670  
0.4205955646073066 0.7135381010743072 0.6271877695107950  
0.5443114950458674 0.4778455264757670 0.6345896133314748  
0.4759467506283976 0.4528361660393718 0.6330577329320234  
0.5221884132203169 0.5469520874358041 0.6334788555101286  
0.4538179997339244 0.5219668037326196 0.6321597987270534  
0.7166644581611827 0.5667132170051241 0.6387661781378872  
0.5785811191123466 0.2866770820960802 0.6310531873543082  
0.2939985761978162 0.3987840212803856 0.7759027152641463  
0.3916292394823057 0.7009450541204407 0.7633761342146268  
0.5457850912136463 0.4849066769271160 0.7793667139992719  
0.4831183826419311 0.4491566774320734 0.7789043211458913  
0.5122930448921771 0.5498576687334856 0.7780422905607723  
0.4496284525519654 0.5141206348240118 0.7771600825944392  
0.7016779743198711 0.5996099461927046 0.7748661754968575  
0.6042931387483264 0.2982771741481027 0.7670418494238955  
0.7347103678451425 0.4607139075750958 0.3039260030307869  
0.4444994066659069 0.2642462887490115 0.1666094703665237  
0.2662015205336437 0.5341505359070318 0.2892174396562069  
0.5501168678427971 0.7357844402187672 0.1613505041257924  
0.7399176542911557 0.5015439078347250 0.4353408408081136  
0.4855676930055807 0.2620729083854151 0.3100749339257934  
0.2618497860879551 0.4902476557276443 0.4209751959866215  
0.5201629889620942 0.7394863775662325 0.3053749348191238  
0.7348126590358468 0.5412500856220276 0.5663109372324647  
0.5237257741673464 0.2634073368218894 0.4430540968289413  
0.2648292953768497 0.4494026589589733 0.5540964925674980  
0.4763986563726290 0.7398682607721662 0.4390237617819477  
0.7225253026223142 0.5849351107909444 0.6953723782114913  
0.5650913679158959 0.2696092573990982 0.5753753752237812  
0.2757695284080838 0.4100922450518527 0.6872364851339927  
0.4350008996294735 0.7306901227682364 0.5717878928081019  
0.7168021060094562 0.6049972844887066 0.8326643078904382  
0.5996206031381305 0.2844147889055444 0.7087227920632069  
0.2844240989014272 0.3854375844215130 0.8335494091238320  
0.3966501980522759 0.7149479319739805 0.7050996212889187

N-CENTERED HEXAMER

```

1.0000000000000000
40.5026200000000003 0.0000000000000000 0.0000000000000000
0.0000000000000000 39.8320900000000009 0.0000000000000000
0.0000000000000000 0.0000000000000000 41.4138799999999989
  C      O      N      H
432     24     48     300
Direct
0.6379679088595792 0.5089851263698211 0.2237029021041858
0.4259564488036727 0.7909335284543211 0.1886305029048140
0.4071085671856401 0.5525521500390136 0.1847206264673526
0.4279398155290929 0.5792554718497975 0.1831491540892382
0.7926150011874333 0.5556705751607161 0.1944993710534109
0.6757076431288707 0.5314301706757513 0.1720474847710135
0.6419177945931074 0.5263486706268850 0.1682001979036792
0.5401199508568912 0.2507043259189738 0.1602212873171021
0.5309041786756482 0.3075566273073240 0.1839305321398568
0.5286162132064411 0.3257726846612997 0.1549289886663288
0.8265272095227453 0.5590838375218802 0.1895097543839023
0.1708647155561109 0.4673544364266286 0.1817579957861099
0.3265435161528527 0.4672958184205412 0.1650011178259868
0.5730769807567040 0.4776649595546149 0.1898615386670208
0.3098160192379234 0.4740912093291773 0.1939574620712313
0.5165206330722301 0.3770612235271552 0.1850547037334626
0.4136788577631172 0.8234545160992272 0.1925884353724882
0.8030468219457048 0.5327240593564315 0.2476498030274603
0.5177854795454678 0.3583516795209509 0.2137174749012317
0.5536282946434063 0.2164537274991569 0.1678115364620726
0.5449276642067081 0.1903948673774990 0.1466179428830591
0.5574095403718339 0.1581377678761459 0.1510197050583313
0.5753742088942246 0.2096732130390333 0.1933785365283808
0.3785092547329290 0.4852011669808488 0.1889004511651820
0.5882395147300985 0.1774019386315377 0.1974542902282825
0.1696760617218752 0.4224132598092434 0.2210256394931598
0.5792434803803315 0.1515772029734934 0.1764109066833975
0.4554626035114370 0.8091025065941491 0.1408794401100015
0.7805614456173838 0.5422892087016639 0.2235838390938210
0.2560561392972519 0.4584919126178230 0.2204574908963091
0.2204105059998413 0.4533586171486359 0.2119563926967930
0.4469381825487292 0.7834778999636974 0.1626307746341353
0.3273989906827955 0.4870743033116394 0.2202834437342528
0.3604136324927598 0.4726855098965830 0.1626032662190775
0.2041233020430097 0.4729915398879954 0.1887116107179288
0.3612924486798475 0.4926009438633120 0.2174549962477979
0.5397381891609603 0.4347975399064056 0.1870403502257589
0.6908618870434154 0.5257212903521795 0.2020442368851053
0.4598569958929071 0.7489393059377232 0.1552713161093904
0.1536386919828743 0.4419181200580908 0.1977456839317187
0.7444173788142897 0.5382083541335662 0.2306729420963072
0.8369194284033167 0.5357646656102125 0.2424651890854777
0.5250355012731154 0.3241865204185649 0.2133141430081769
0.5217003265937434 0.3600680137277055 0.1558542774386255
0.5938645261850318 0.4477813188579078 0.1902808719568718
0.2027832388141244 0.4282570575298758 0.2282879040628032
0.4613268463895192 0.5655222975377988 0.1833674732328169
0.4435715214741620 0.8416065882245654 0.1451600612885139
0.4898049132696806 0.5860378900335901 0.1829958441770159
0.4150740583587721 0.4897435953306248 0.1869253467432334
0.5113149708774121 0.4142749614582501 0.1857347733851046
0.8487457103711532 0.5489228556039699 0.2133931958691334
0.4780084179461561 0.6768662802832798 0.2089499213986740
0.4225065474584177 0.8488471559521559 0.1709954412036299
0.5730800880775080 0.4210528654848110 0.1884123571904258
0.4785171638110561 0.4257157809044526 0.1856249425108605
0.4341200505612698 0.4602027515573726 0.1864693089213608
0.4855815845340171 0.6427820171006604 0.2097239587484264
0.6223301672591329 0.5152088957685746 0.1940502975698828
0.5858693585827622 0.5106606031732175 0.1905156639509203
0.6717499370315436 0.5142172100429852 0.2279906266468836
0.4845661725516338 0.6232026878775778 0.1815814757279374
0.4768820135311047 0.6392870333615842 0.1524156887511532
0.4697721760353266 0.6735170075445792 0.1510922115283277
0.4696752489925489 0.6925703931325343 0.1796747852765927
0.4224240515371901 0.4261924541371227 0.1870920594894584
0.4493806808732054 0.4052761230436935 0.1862643830547691
0.5668740523276150 0.5401582696305831 0.1883774630918185
0.5225787910383664 0.5746163413689523 0.1847042519998869

```

0.5517155765751697 0.5950459006454055 0.1856974195642576  
0.5785840773627590 0.5741582535943465 0.1882399718741592  
0.4278968425866125 0.5227040511876591 0.1858385554670673  
0.6357493628559635 0.5317683017326977 0.3510081762427855  
0.3744863672456202 0.7735054768748416 0.3107978303906364  
0.3990337537380855 0.5329268958218395 0.3155447378965931  
0.4138800270600083 0.5634962252276133 0.3144619084122637  
0.7841209464023343 0.5933245931143135 0.3158380347314989  
0.6651347251152153 0.5657858547688112 0.2999125287914503  
0.6320054748519086 0.5566096577593568 0.2981480768806872  
0.5787599022893078 0.2607297844768698 0.2909612139519008  
0.5655798354386756 0.3161749142097352 0.3146892421283188  
0.5712530087411659 0.3376848925778355 0.2884892883724165  
0.8176293047802365 0.6003198685165969 0.3117344126904122  
0.1775697696516663 0.4297828232136030 0.3147641892772537  
0.3371068285557119 0.4355257610148335 0.2921888331018316  
0.5757679572004384 0.4928221448091442 0.3201176258284263  
0.3176302361496384 0.4417563967153338 0.3194975593408393  
0.540496672395900 0.3823548184911989 0.3154070386529274  
0.3581505661261800 0.8040893440420273 0.3148910586833732  
0.7937377492093164 0.5823720209830852 0.3725452206502176  
0.5345758301007777 0.3602922981479478 0.3412089615867921  
0.5957952589900195 0.2280420343145351 0.2977704692282541  
0.5824741206464561 0.1986492820362651 0.2844018687895868  
0.5979378295985607 0.1678090195337866 0.2893235576699516  
0.6250856074994895 0.2261665333521916 0.3157615289865117  
0.3844706430628363 0.4617447850990410 0.3181559712706581  
0.6409486863415447 0.1953428120688791 0.3199975434998434  
0.1818436229205850 0.3775684256760374 0.3443050824862210  
0.6273418759220724 0.1661096916991368 0.3069688132706589  
0.4168738088038987 0.8016009912412848 0.2796300206770623  
0.7718566985129971 0.5842782188988995 0.3463283511531581  
0.2665245329635819 0.4176320021233274 0.3430415014608032  
0.2304961112430286 0.4121541178081066 0.3364374856327118  
0.4039153254931628 0.7720382839687540 0.2929875469234910  
0.3316708664474491 0.4577667689291304 0.3462892190574577  
0.3701377448669718 0.4452807035358527 0.2916701404381823  
0.2113343533752787 0.4353251577240739 0.3190966019671641  
0.3646364695009500 0.4677370949314005 0.3453816567711525  
0.5520271900112443 0.4437418070391519 0.3173286405644016  
0.6838521281072936 0.5579566216600448 0.3273622224181678  
0.4214645247142668 0.7395846232146767 0.2863763409653658  
0.1627997577874324 0.4008412559222777 0.3271835755513517  
0.7359862437797356 0.5775199327967598 0.3528583092025103  
0.8272546354698321 0.5889645331401648 0.3683252790503577  
0.5470947311253239 0.3277167070348054 0.3410370234509826  
0.5590107996893708 0.3703699349622855 0.2891113805442884  
0.6022537298569076 0.4680165765416973 0.3201750003638894  
0.2154065480990578 0.3833676898492985 0.3492206159269337  
0.4493445228778642 0.5572040533776310 0.3145816605021824  
0.4009081000753013 0.8322087519546361 0.2843733457889149  
0.4731106905007312 0.5832443319701837 0.3143756939009901  
0.4195720504961231 0.4731759556938036 0.3172943352206599  
0.5282972260886122 0.4176947079019547 0.3162089032169821  
0.8392782699736091 0.5980491618652168 0.3379112151842941  
0.4519966950681323 0.6729476621843119 0.3382045292919461  
0.3713856484281313 0.8334946884332908 0.3018571519321897  
0.5874507773909217 0.4374486015835616 0.3186811232926505  
0.4938522155578145 0.4224116489624397 0.3163023138006822  
0.4439189898664577 0.4479678685867093 0.3169429345201811  
0.4648211520724925 0.6405146578315346 0.3390346820688228  
0.6167406339693311 0.5391300544963867 0.3235252547441708  
0.5817015547146532 0.5278240738163925 0.3210767683799149  
0.6688416989562312 0.5410949394823323 0.3531586265741959  
0.4608663712482798 0.6185426730136416 0.3128089581512555  
0.4440883838119677 0.6304899654221178 0.2854167721455239  
0.4315732790103321 0.6630548465870679 0.2841254381619099  
0.4352076530671512 0.6844571898779813 0.3107627886223868  
0.4386286909634078 0.4123614078402451 0.3166007160061045  
0.4689112488822866 0.3968676796900697 0.3157633139252763  
0.5573846367157055 0.5530405102035020 0.3195069553033213  
0.5075108615748265 0.5785580609596813 0.3162057236381368  
0.5324115709167764 0.6041264210729790 0.3170816504939312  
0.5626222016554042 0.5886642381989138 0.3195518103528996  
0.4255132734878498 0.5081496388255839 0.3165911946677409  
0.6269540008793478 0.5554530400098170 0.4718458219201266  
0.3303101008945800 0.7488197162404586 0.4338122512899347

0.3925227491564373 0.5143070605678014 0.4383621233029654  
0.4021129203322746 0.5469722063498825 0.4371985757340063  
0.7610873450477604 0.6435883732691199 0.4340885803892744  
0.6487761018710284 0.5941196279346159 0.4201364908075043  
0.6177401500019606 0.5790927862984321 0.4191078229651195  
0.6183197078182404 0.2795497228756443 0.4126817529624150  
0.5943376778336641 0.3312189270171705 0.4364622990690487  
0.5947397325493209 0.3530150516506865 0.4099096971252593  
0.7927381776474699 0.6566634879255782 0.4296311996596433  
0.1929355322648956 0.3694900059044657 0.4350345875861596  
0.3492916534322409 0.4055240236329719 0.4151062885389052  
0.5737168674719348 0.5062898372941240 0.4423787286514494  
0.3280352695609270 0.4091324355634464 0.4415664135242384  
0.5575515122806829 0.3914348529713379 0.4379445920320573  
0.3093602962737251 0.7764024337930584 0.4375274344095614  
0.7730011420443899 0.6351264063964162 0.4907877754697111  
0.5568435320909906 0.3689731473469590 0.4640568339491197  
0.6422101599211881 0.2515863037453862 0.4191976462861823  
0.6357987489137545 0.2200085385383889 0.4055627889048341  
0.6578071469334602 0.1935377525903037 0.4101546780777029  
0.6712186257357174 0.2563793674617927 0.4371339115131518  
0.3901434187075332 0.4413533543898662 0.4411485758540563  
0.6935797913614756 0.2300095826704299 0.4410878193543364  
0.2064816396619424 0.3204377101708339 0.4668115454673259  
0.6868624040155873 0.1985287005339123 0.4277693202264672  
0.3667763401032737 0.7825121602513668 0.4006694888604571  
0.7509266559703118 0.6327032203108549 0.4647634312785928  
0.2817794978861694 0.3765945272046722 0.4650432209379008  
0.2477244821882220 0.3636802325728872 0.4580944505151237  
0.3591378483830622 0.7516647637586982 0.4152179630910411  
0.3379170589332888 0.4287409454666580 0.4679327608404734  
0.3799911103627688 0.4212880981944961 0.4150902518477335  
0.2248971639502006 0.3817999304398523 0.4395019823436890  
0.3685131011220628 0.4447387517805417 0.4674820740769038  
0.5583920964113240 0.4538422794959083 0.4399370251857023  
0.6691462945946213 0.5899271921153743 0.4471862444630956  
0.3815904159036251 0.7224413783828095 0.4089632125213593  
0.1837159005756632 0.3387395383305819 0.4485044398359982  
0.7169146267973836 0.6195101804283294 0.4716749868912450  
0.8047391585068465 0.6477645180597269 0.4861947441746973  
0.5751185837252922 0.3393421724942663 0.4634884134491839  
0.5767018125885490 0.3827811017144068 0.4109008001931062  
0.6039248359393671 0.4863853015892863 0.4421441447623907  
0.2381653309135588 0.3330175553201301 0.4719015786955756  
0.4381068468251909 0.5468476892597897 0.4374920599080883  
0.3461825500394603 0.8101803279033678 0.4049777343602329  
0.4571644591632336 0.5766051773243895 0.4371196754592601  
0.4226891789883754 0.4589148441316732 0.4406269877148032  
0.5394048811252151 0.4240425152615144 0.4391372618878934  
0.8146633731521618 0.6586617403265675 0.4556020474856944  
0.4220540939863824 0.6616626158265548 0.4608752246588749  
0.3173138422552705 0.8071427048294152 0.4232815276190180  
0.5943742235916426 0.4537208197689684 0.4408089004890150  
0.5047004741341136 0.4224770074088730 0.4397050975638076  
0.4510512244641117 0.4384753557104049 0.4405122516509857  
0.4397371806921096 0.6316879055218551 0.4617438133021999  
0.6063384835182277 0.5591967566013568 0.4447866018786257  
0.5737538347517965 0.5418103198524143 0.4430364035655682  
0.6579070248108037 0.5706697315626773 0.4732683251346078  
0.4392259345156530 0.6092945905608824 0.4355656958858556  
0.4207494110469766 0.6182980209890696 0.4081902182018630  
0.4032997426349010 0.6484206453532970 0.4068858131670270  
0.4036521750268168 0.6702326327890114 0.4334344731395573  
0.4521501995934624 0.4024881280281354 0.4406807956511033  
0.4846786781999640 0.3927826934884946 0.4397502642159335  
0.5454422528462851 0.5622562482627557 0.4416059597270965  
0.4918471565219334 0.5781653034665520 0.4387204345399082  
0.5118357187159384 0.6078840097745458 0.4392118146157992  
0.5443124423545893 0.5982336556223474 0.4414108545350623  
0.4227112099455861 0.4944192505054453 0.4397089786997112  
0.6153772030033506 0.5797076760278250 0.5918851154959400  
0.2887320095739816 0.7141090813482373 0.5554919267679637  
0.3925765061093826 0.4951545279063901 0.5599737047757540  
0.3959267399145086 0.5290846898617916 0.5592077722235511  
0.7324495001731488 0.6895787385592203 0.5533119983533578  
0.6299626608903178 0.62133412808086947 0.5398919657739251  
0.6020909558285948 0.6008738000856927 0.5390082691834635

0.6538611954860900 0.3045168328800582 0.5333221838631649  
0.6230756019604629 0.3520492390931428 0.5573266876437446  
0.6204437347843377 0.3738360233246912 0.5308913849931246  
0.7613644312176611 0.7080650266016341 0.5487662115211980  
0.2221758051335631 0.3173214450830176 0.5577979626322669  
0.3692769368322790 0.3810654031061048 0.5351622163504915  
0.5721171870289075 0.5213038720481967 0.5626131254211738  
0.3484975450104627 0.3798428222510533 0.5621695552534458  
0.5771283390221034 0.4053014936374505 0.5584484571006179  
0.2629972336307541 0.7371225424453728 0.5592496956373374  
0.7446857724618526 0.6853128299463793 0.6103637408964603  
0.5797793069326143 0.3829736673602939 0.5845517787915872  
0.6809281080170460 0.2797267052002226 0.5397317868055352  
0.6780638542293532 0.2474232334440680 0.5265298660738593  
0.7030838067351312 0.2238691468364692 0.5310738111720793  
0.7094291125671528 0.2882655852065448 0.5571425681921672  
0.4037246961735418 0.4230574727445161 0.5614860647330019  
0.7347987067829168 0.2648590872245751 0.5609960796712830  
0.2445595679959336 0.2705118058617379 0.5878982310050472  
0.7316079288505837 0.2325945706105141 0.5481590302695715  
0.3188235412264573 0.7547738076614878 0.5235010916264347  
0.7238306671808439 0.6780228851293132 0.5842169741428156  
0.3094680159990148 0.3387462835462658 0.5856916763939995  
0.2778120603969267 0.3203851808743313 0.5793242190031935  
0.3168126272709764 0.7227481441769240 0.5374673626013126  
0.3554725195717165 0.4000967433257248 0.5889737349192085  
0.3966343500392435 0.4022678205292433 0.5350036432944498  
0.2517731885935305 0.3348099523854018 0.5618069811615766  
0.3826558775059833 0.4215187508785247 0.5884001034922235  
0.5667662223412528 0.4668735915841360 0.5602402693244937  
0.6507522156553419 0.6211604007681263 0.5669357204303545  
0.3443666144717194 0.6984205600818656 0.5312676507479428  
0.2185645431563629 0.2851068322205051 0.5706526015233822  
0.6926828171003852 0.6588843459188377 0.5912292610088723  
0.7737311062836196 0.7034334785601790 0.6057162327404343  
0.6025659974680057 0.3567808027382193 0.5841796121613686  
0.5978329533473891 0.4001825834022032 0.5316765626018687  
0.6054776214971797 0.5075185081169372 0.5624822059493214  
0.2738647815892026 0.2882037209776259 0.5925394121827986  
0.4313072933203354 0.5358590474911703 0.5589248331801787  
0.2934144245395194 0.7779323918480416 0.5278542642037934  
0.4445652927065423 0.5687211980840535 0.5585899883559344  
0.4324783287457534 0.4465072641997156 0.5608613179819980  
0.5535164469784004 0.4340426516368777 0.5593477001625546  
0.7821165174119364 0.7149344095125484 0.5748910564016002  
0.3953447144716565 0.6461947795502002 0.5826563803994573  
0.2653430296241222 0.7690999819459309 0.5456003221440220  
0.6021279351642167 0.4736076493709770 0.5612238222168680  
0.5196772098234360 0.4260317978431649 0.5596321762460904  
0.4640600293727821 0.4317794480683054 0.5603619204988344  
0.4180443570191668 0.6199321384114970 0.5833819489977827  
0.5944312730050040 0.5794103755834377 0.5648409922691338  
0.5655614769120206 0.5561867385352711 0.5632460446901659  
0.6431164297801747 0.6003657340512827 0.5931820112581716  
0.4209875885579857 0.5975049348262298 0.5573733788687437  
0.4006031208914075 0.6026373566847514 0.5303583341024048  
0.3780948986863326 0.6290720613284790 0.5292109647239255  
0.3751855469432158 0.6509384257611033 0.5555485658510508  
0.4716054022070048 0.3966018679744664 0.5602581569178670  
0.5053292174560722 0.3931191237660335 0.5594145694970383  
0.5340028098238460 0.5709408271748070 0.5619921391386221  
0.4784085358650449 0.5767140892919900 0.5597244579180770  
0.4927734283832272 0.6096249089787383 0.5600992295324918  
0.5264587203953391 0.6061152717083990 0.5619174084269000  
0.4259243059592984 0.4813879515414026 0.5605145268655011  
0.6009598232077089 0.5987630464337048 0.7133160737305682  
0.2556807216362286 0.6716447188476237 0.6785653247292875  
0.3958947119198407 0.4752953168328290 0.6824855570803444  
0.3933653700578234 0.5092977669639825 0.6817721476079668  
0.6944876659835162 0.7296021619038493 0.6738640803250161  
0.606996539462509 0.6420961583462785 0.6609700694797112  
0.5833182313266218 0.6167428172303809 0.6605703848432622  
0.6855261953075944 0.3339539512560603 0.6546602310924602  
0.6470425914595758 0.3751640645320911 0.6791531859859430  
0.6403857941660152 0.3961587784777721 0.6528166561342845  
0.7193101565262401 0.7534322601703509 0.6691684390546598  
0.2600168466854209 0.2675387246537427 0.6773887380610307

0.3929992413690091 0.3588780978174679 0.6570740452818320  
0.5681413012755340 0.5331292348900787 0.6849620857778724  
0.3723121849474286 0.3538829360955870 0.6837611116223530  
0.5929725641414139 0.4198048434915008 0.6811887746358294  
0.2264274349666942 0.6896770422712640 0.6828214694779029  
0.7088448659178808 0.7264879207637867 0.7305196771952444  
0.5997586408860456 0.3983159957219701 0.7072257119428947  
0.7169060882368535 0.3150334550195354 0.6608251984107718  
0.7205884493860383 0.2831603319303805 0.6468704244618593  
0.7496675192552789 0.2650230210533281 0.6512927136019225  
0.7429737897233901 0.3287099962319206 0.6788621559870034  
0.4192536699622640 0.4062966395674584 0.6838907934733131  
0.7723289242784249 0.3107585975598937 0.6827116121347496  
0.2913450385579713 0.2258430986944036 0.7067873017572430  
0.7756707715355121 0.2788481006472526 0.6691088074647051  
0.2774922436088957 0.7168624783264942 0.6458034393967086  
0.6890357406470100 0.7158984017581466 0.7046439700306950  
0.3406292158946894 0.3065253365831671 0.7069465401974163  
0.3135902940558837 0.2819144182452005 0.6996748640111227  
0.2814317220559488 0.6851056509714130 0.6599450786900236  
0.3751982046326159 0.3750721509982126 0.7106318448469540  
0.4162787950492230 0.3846221113347558 0.6573163284092660  
0.2853328638518224 0.2908467455341007 0.6820760463285011  
0.3982755482851003 0.4010164805834359 0.7104303674093582  
0.5721876373014690 0.4785698889978839 0.6830251880292841  
0.6278045918274237 0.6460381305079929 0.6877366700237735  
0.3127499588204664 0.6661894565516588 0.6533321043461429  
0.2630354570968413 0.2349826645030212 0.6895532149891858  
0.6621819847340765 0.6909938033820888 0.7118477538847716  
0.7338795619319373 0.7499615780434403 0.7256922385612768  
0.6265151733693484 0.3763548953913182 0.7063588584844341  
0.6137519488431951 0.4182532303439180 0.6540668211233163  
0.6033412571329693 0.5254733566849210 0.6844829039814010  
0.3162864965504127 0.2492962359667656 0.7121864346719909  
0.4270406153177112 0.5222400991493806 0.6817921884130697  
0.2485211535360352 0.7350724696040284 0.6506023738482842  
0.4344524183913908 0.5569353312768223 0.6814884196441068  
0.4435207795979885 0.4344829882661841 0.6836862210726735  
0.5647886702008024 0.4438962379112429 0.6823434926921779  
0.7391254454029987 0.7635690352313325 0.6949991324458371  
0.3722033357808311 0.6241389787121643 0.7051027865588424  
0.2228416822316849 0.7214644368622349 0.6690121595635578  
0.6058553400185578 0.4914789864264434 0.6835422288853071  
0.5328849982526821 0.4299365455735015 0.6827652651470754  
0.4771581092140857 0.4256384386297430 0.6833978772518542  
0.3990592827026950 0.6023230794573038 0.7061297171443984  
0.5800244477120546 0.5944031945919426 0.6865981467082415  
0.5557015997771384 0.5663082871413262 0.6855327191762214  
0.6244719296400941 0.6242834876608477 0.7141372256074757  
0.4062880903228694 0.5810487526176527 0.6800362675153065  
0.3858829012017206 0.5827859528177950 0.6526484271529787  
0.3591323803402703 0.6047489246239762 0.6512298160881774  
0.3519717705672830 0.6254214710491205 0.6776786151051500  
0.4906607653101344 0.3923561292377650 0.6833498758752626  
0.5244582830608546 0.3949640788187317 0.6825637383927733  
0.5220757997190439 0.5751600912366823 0.6846579805923526  
0.4663615650356977 0.5708715004970392 0.6826955965550066  
0.4747965392643052 0.6058396127841715 0.6831269446255039  
0.5085640523800872 0.6084352726042328 0.6847497184731492  
0.4310850286330979 0.4676560080259649 0.6833242036947301  
0.5786840110655826 0.6179948003121479 0.8462953871653024  
0.2379980612640386 0.6411878597154012 0.8096827908013433  
0.4031871989431338 0.4557544480258041 0.8140556368467280  
0.3944649622832009 0.4886834789689024 0.8129300969776390  
0.6544240992482370 0.7567693733315932 0.7972151911676990  
0.5879728536816538 0.6526346140806117 0.7888176130170849  
0.5677331579098573 0.6244336857281777 0.7896152274438836  
0.7098243672874783 0.3650882637296982 0.7780040533617449  
0.6659144050787733 0.3995816443587210 0.8053890613154729  
0.6543232049673324 0.4187218646232357 0.7793564854217392  
0.6719204779878000 0.7860596742155175 0.7900821045397469  
0.3015526164595418 0.2316064460905878 0.7988301710386636  
0.4126873274923553 0.3460368158787943 0.7867338301029199  
0.5620460525175313 0.5438500615409247 0.8177327482512893  
0.3993423023226804 0.3335046957846081 0.8156533233112061  
0.6068757790701399 0.4368675608103613 0.8114561347287301  
0.2093336268974131 0.6593309825971945 0.8164383352393009

0.6780989899389378 0.7564972476137871 0.8508389391662823  
0.6190697738909768 0.4179082475081097 0.8374342839416471  
0.7408509773343974 0.3462922985866231 0.7860564609462889  
0.7478418159773720 0.3167977055155548 0.7688705232309656  
0.7763191699438344 0.2984396765075176 0.7755999306744590  
0.7632237389024812 0.3574538211160739 0.8096550782868704  
0.4382581583700246 0.3924990440287231 0.8155970848189320  
0.7919281780197266 0.3392404726785914 0.8160805204027768  
0.3209985452541632 0.2038954815347195 0.8471679579347298  
0.7984140581705311 0.3095861950239716 0.7992201040482687  
0.2528920980908693 0.6819907944114638 0.7688685257577814  
0.6573533703452775 0.7416683489115523 0.8277082519746961  
0.3695278160286504 0.2842267971149892 0.8387373595794545  
0.3455224293967927 0.2567739660962086 0.8304249578244572  
0.2601152857647677 0.6524671980774713 0.7859144831113847  
0.4061536198435292 0.3503321322688644 0.8447510985943339  
0.4320050230434235 0.3749548847451994 0.7868654427706444  
0.3244044727207024 0.2574201499751326 0.8035630483168608  
0.4251782405785597 0.3795147072433546 0.8443412856316237  
0.5760522010435678 0.4910589948241491 0.8152662262506462  
0.6040295553070248 0.6638573720626875 0.8169319388459030  
0.2911272087135222 0.6338064163111314 0.7775509983848455  
0.2998505084575880 0.2047881943207510 0.8204897320204162  
0.6383833591658847 0.7110629398562170 0.8382444520432697  
0.6957486808529639 0.7855577055853783 0.8436012325630757  
0.6482108880787796 0.3996085026796858 0.8345342882311474  
0.6252189746539174 0.4371335053286618 0.7826882716031931  
0.5980457384825165 0.5430246982140001 0.8173691262439136  
0.3434577102061768 0.2298415096247556 0.8522170484941630  
0.4251877867548746 0.5077661957032494 0.8131505960430859  
0.2244592721043333 0.7002885536424905 0.7759368893480972  
0.4262354807646598 0.5432326201771699 0.8128479091102984  
0.4573478249080115 0.4246712188239586 0.8154171061571446  
0.5750249852365240 0.4556286999514731 0.8139547247762604  
0.6926501989262502 0.8004892776070489 0.8131826630150634  
0.3529663519829332 0.5989622319615669 0.8337474345254791  
0.2026180124400641 0.6890275123860695 0.7997306134702133  
0.6067687880822765 0.5101154373986817 0.8158875509982609  
0.5460975212347778 0.4360675876070661 0.8143859263713875  
0.4919414456854115 0.4220432526731350 0.8152079046308626  
0.3821049736101625 0.5806588821608036 0.8365176626742570  
0.5631469532378984 0.6061789763366289 0.8182576276427254  
0.5438629491847959 0.5741539026854775 0.8180980132295093  
0.5987392959851252 0.6464954962982762 0.8460548530389106  
0.3944193539207646 0.5620390922090465 0.8103593814718149  
0.3761545425149255 0.5621231623893452 0.7815351500699814  
0.3470277605716907 0.5805330332794515 0.7783392314077178  
0.3353416527356229 0.5993376947469180 0.8045571972925504  
0.5108548413176158 0.3916278274513411 0.8142831968467680  
0.5437170946284495 0.4001276693273326 0.8134691090323862  
0.5092714828154232 0.5767796522864529 0.8170039898988567  
0.4551470965682980 0.5627681724956528 0.8145029257922861  
0.4575265873032014 0.5987116378143388 0.8144412266833095  
0.4903536902590412 0.6071977329147484 0.8162516887538469  
0.4391678541063933 0.4549439676710337 0.8149243095187739  
0.7333443230439164 0.5408051083309892 0.2585513212625025  
0.4691919391860043 0.7415560710013768 0.1277094822025998  
0.5300263560116953 0.2574339960723382 0.1327549182274583  
0.2667842607088078 0.4538303333573587 0.2481801637587082  
0.7240201167853236 0.5822360551434871 0.3802203242826717  
0.4352036298011691 0.7342840205127390 0.2599951098354910  
0.5652194473683717 0.2660987520432062 0.2644875749740633  
0.2793028430144534 0.4085488376308890 0.3689577260886503  
0.7043303115943392 0.6227450178044073 0.4989840553483152  
0.3961525333235727 0.7192835106280479 0.3826451830023964  
0.6035795564955230 0.2816447704340990 0.3863540460984518  
0.2952602794495214 0.3715591111441811 0.4916439000681201  
0.6798515223189553 0.6596337622444836 0.6185987597987888  
0.3595524313629727 0.6983659059536199 0.5051048600285195  
0.6390408155806175 0.3049304420904269 0.5069587421356525  
0.3246097976170207 0.3352796936834185 0.6116624348499746  
0.6498444230560868 0.6889800558272849 0.7393367649223274  
0.3272231901466188 0.6687016322452863 0.6269174544762174  
0.6705662478975866 0.3313948853081078 0.6285030506577901  
0.3548831073322206 0.3065561059392483 0.7335624662916395  
0.6352429663528121 0.7043417131333646 0.8672859099529746  
0.3023770687880857 0.6331378532953450 0.7496684065900022

0.6983244956248478 0.3659184161595637 0.7502176012522681  
0.3798718715214668 0.2874484517864002 0.8666985148540175  
0.4605177432306830 0.7266551472910877 0.1807411596280605  
0.5403289766549265 0.4692140123021040 0.1878200489272190  
0.4680398559241887 0.4586082565673740 0.1856085033091160  
0.5330032648899997 0.5417389846406523 0.1862082710765444  
0.4607071129182277 0.5311362476558258 0.1848919819981606  
0.7253507500166558 0.5309598286220057 0.2042188115529888  
0.2754099039201735 0.4681863532182915 0.1948256643229029  
0.5399092996857221 0.2734498432832517 0.1853094094267073  
0.4211865609172574 0.7170077211265277 0.3113772286138538  
0.5455073248822141 0.4775162500133967 0.3182443458091670  
0.4775744219348119 0.4527565438370474 0.3168552339583827  
0.5237842716244462 0.5482278025054351 0.3175752234381669  
0.4558305198824409 0.5234461005951663 0.3159331604627285  
0.7179635172141300 0.5660783375239477 0.3272474199556938  
0.2837326877431559 0.4328612503469526 0.3186532890334159  
0.5791934854693243 0.2834353940327658 0.3158327953160919  
0.3848169477477573 0.7002054491404283 0.4339816354793099  
0.5463789429158712 0.4860163392554888 0.4409317640399026  
0.4833074101916586 0.4493440282399369 0.4401310874331393  
0.5132329634228514 0.5513380831560537 0.4400897206980753  
0.4500741195383851 0.5146874155856174 0.4390754671204297  
0.7012779182391241 0.6041396595541227 0.4464842539357132  
0.2964737611962435 0.3937808288041014 0.4403043617749326  
0.6141152056044454 0.3018730334108932 0.4374621051257172  
0.3513271086091861 0.6769795093069950 0.5561779440537498  
0.5490283256506798 0.4961807203684374 0.5611610646837274  
0.4938226999335991 0.4484640222018330 0.5600734319406553  
0.5042477827708783 0.5542712743130987 0.5607247243215946  
0.4490326543695193 0.5065451652649464 0.5598323458195087  
0.6797960785829682 0.6410339247281153 0.5660481744318789  
0.3201463595024833 0.3590038474052018 0.5611231270954619  
0.6468826729424381 0.3259605385833190 0.5581993848756092  
0.3238721712177841 0.6466398332744153 0.6782464841329482  
0.5496971774844698 0.5042800392353654 0.6839727282977832  
0.5035662747247025 0.4473969407742167 0.6832000244864906  
0.4956773434705936 0.5534072056363365 0.6835621611217598  
0.4495258642305499 0.4965279821266088 0.6828607606009923  
0.6525732515401149 0.6711385593052981 0.6865768879101031  
0.3481984412228290 0.3281816052114710 0.6823121153349482  
0.6749256060484404 0.3536594325985362 0.6796606454403259  
0.3058336096897983 0.6182389970912288 0.8034500635777008  
0.5492087502114074 0.5120120474838944 0.8165871476999862  
0.5142776819439767 0.4481183329678247 0.8154182649861463  
0.4869414465239539 0.5507024035483301 0.8161029858829967  
0.4520086637043850 0.4868047759926967 0.8144723499980292  
0.6248878590143214 0.6919474199797927 0.8138922370029490  
0.3788770743250328 0.3050034657502025 0.8137327544555858  
0.6953873736355840 0.3806337743443944 0.8040632554157514  
0.3802826747064219 0.5528526977277505 0.1849302478308842  
0.3748550336303453 0.5025698858379837 0.2381303365951769  
0.5794266080402091 0.3945552327957814 0.1878779661953973  
0.3966009803637703 0.4189783431177957 0.1880107682585910  
0.4495820066939730 0.3780228292648614 0.1863541524733941  
0.4215891544270241 0.6057245698443087 0.1819243895197716  
0.5515923367021773 0.6222788152449522 0.1847324483980341  
0.6043735621640147 0.5813822618171378 0.1898142957639374  
0.4761437662709463 0.6245990878187150 0.1301532680700138  
0.4641509854839524 0.6855945373543774 0.1282047793352299  
0.4831067596130512 0.4792219173988844 0.1856568944203230  
0.4777396800061280 0.6914301096517460 0.2313106074180761  
0.4916869374181771 0.6309811640954595 0.2327546086479961  
0.6232575731318182 0.5000670145057391 0.2440710332137792  
0.6832047302283643 0.5097244849142315 0.2513517843369323  
0.5179052209153714 0.5211489470581513 0.1863174259187527  
0.6904882384193185 0.5402024885374570 0.1516178401008534  
0.6304653702806420 0.5310761665500127 0.1447752078204430  
0.5135508871541367 0.3708524735068882 0.2368034940654740  
0.5269316987239060 0.3102536670737547 0.2359755878259355  
0.3129355358041517 0.4573572785475428 0.1442888122238485  
0.5323946506720220 0.3129936250854502 0.1320326068843544  
0.5206787383474508 0.3740702043366034 0.1331949361487270  
0.3731295905232181 0.4670541070309811 0.1400005703131038  
0.1276703310816394 0.4373930313558783 0.1921671137106544  
0.5893624484798606 0.1263892786278111 0.1796883693540173  
0.7376569809964745 0.5296885343569590 0.1828373262773500



0.7934849467380422 0.5228131677433154 0.2703577889397670  
0.8541746638336417 0.5279076546153192 0.2612527683996024  
0.8752740576380464 0.5514182951821681 0.2093886960748647  
0.8356023895095569 0.5698809861926478 0.1669685411163353  
0.7756030326866604 0.5645369577742452 0.1758580931007130  
0.5459371246282364 0.2648877460938540 0.2078032177075057  
0.5284235834640695 0.1962902034715731 0.1265775358059592  
0.5502853856073030 0.1380526858754626 0.1344770058858954  
0.5829586100165967 0.2294623795332580 0.2100876487408651  
0.6054938110195465 0.1725531112743958 0.2171577262596968  
0.2643907435965278 0.4664280958588935 0.1728040033718296  
0.2171207355595259 0.4934891638510863 0.1766179811821263  
0.1583231177665713 0.4830124828759927 0.1639370420708697  
0.2154274146583670 0.4134015730224069 0.2466363829177750  
0.1563088213052463 0.4025499262494545 0.2336376388569051  
0.4552019891070671 0.7356589805237590 0.2032422656314895  
0.4184917182963737 0.7714832864166676 0.2057600595719074  
0.3969776223921838 0.8288325636975368 0.2126161169357976  
0.47136823368198045 0.8026825099968643 0.1205295411095964  
0.4505492143655027 0.8613512191866477 0.1281850580287569  
0.4128366643799165 0.8742292536996009 0.1741861508917064  
0.6206604332193427 0.4474846785213744 0.1915440328546837  
0.3147279608198045 0.4924101842293989 0.2428778596164799  
0.3727352102539552 0.5275943536999705 0.3157184637522048  
0.3752957932917015 0.4805053070055891 0.3662528873900959  
0.5993005848361581 0.4129939511974779 0.3185069822357610  
0.4145545783877913 0.4004075528743732 0.3166903690887209  
0.4738420759352644 0.3701084237026111 0.3149013076294818  
0.4020692974305700 0.5879609984806838 0.3136910859240855  
0.5274850683110841 0.6308826730018355 0.3160969622609064  
0.5866263267158844 0.6006580567678730 0.3210630398257350  
0.4406327066355237 0.6138455165521962 0.2647439637494663  
0.4187815042279756 0.6718254947289218 0.2625878262911748  
0.4890445298327992 0.4756385741161914 0.3171654722960250  
0.4542658568005601 0.6893392910274512 0.3592052782705913  
0.4774395671045996 0.6317562429975959 0.3607504137010125  
0.6243479528396846 0.5183146854801669 0.3710898505742006  
0.6830705805046100 0.5352261710536177 0.3747346310420026  
0.5123422236964634 0.5253316849396441 0.3172785501384429  
0.6768761127009566 0.5785788243639169 0.2796375480100092  
0.6178708649036895 0.5624720011561232 0.2764207483902977  
0.5205730281082642 0.3690670229970978 0.3620907687673429  
0.5431795694986745 0.3112166174874974 0.3617229358552892  
0.3260698186455535 0.4234517397235081 0.2711397771470948  
0.5854289536332677 0.3288713868137491 0.2678009729004013  
0.5639994087880833 0.3870770895125349 0.2687868777208750  
0.3849758517083786 0.4405166433967673 0.2701408722191443  
0.1364245139288060 0.3964726959711347 0.3236603716478310  
0.6396855974490427 0.1420023084285370 0.3104516906421580  
0.7296432564622304 0.5622232356913690 0.3056117634882985  
0.7839140762056421 0.5757193666389068 0.3962175275481717  
0.8440356847288929 0.5871677310079425 0.3888860322242165  
0.8654925889292912 0.6034821678759912 0.3346308205113475  
0.8268205125970590 0.6076324278906315 0.2879746833535805  
0.7675691010914998 0.5955285750243123 0.2951293508795171  
0.5872690455955418 0.2756947136060617 0.3381086755082571  
0.5599080090322511 0.2004220476442563 0.2701084932330855  
0.5871229508526478 0.1450144464307651 0.2791874898740687  
0.6358548392770303 0.2488885066930153 0.3260923319611550  
0.6640140450042354 0.1942491095345253 0.3335918554200525  
0.2723862071653705 0.4357130156534593 0.2967069630158954  
0.2226510352817858 0.4580642865473183 0.3093729993126976  
0.1627902773324058 0.4481884341566930 0.3016253528982493  
0.2303941960615991 0.3657165050740471 0.3630419591034912  
0.1704455941540290 0.3548682804372021 0.3540170864701768  
0.4128723936159138 0.7248866404634015 0.3335089504006735  
0.3639869619932041 0.7506459862498074 0.3211171524415536  
0.3350160186197907 0.8048773377242061 0.3283874463571251  
0.4395604000887507 0.8001482228986899 0.2654867535654353  
0.4114363578749698 0.8551500018657207 0.2742497263616509  
0.3586476116433393 0.8574129951707994 0.3051976558243504  
0.6285328224924814 0.4732947455250084 0.3212775110505747  
0.3167873876883425 0.4624717083889316 0.3677257464242509  
0.3674814048576558 0.5045545903291819 0.4383589758844281  
0.3759154945896484 0.4601285948875468 0.4880608710902392  
0.6100883690163661 0.4316321006687348 0.4403930309396208  
0.4305927186324071 0.3863254852464033 0.4411960920748434

0.4942758374418818 0.3673494415388509 0.4393341636935145  
0.3864188070640567 0.5690546330008208 0.4361799971640855  
0.5022598864676533 0.6333022833592648 0.4382104839306749  
0.5658214748805553 0.6144244800017158 0.4426064261000425  
0.4200461197352269 0.6013171360375551 0.3875037484798410  
0.3893287484008855 0.6550063089747421 0.3853293431747945  
0.4903460040927984 0.4740121115714739 0.4400522419380852  
0.4217985195901666 0.6782859387648188 0.4818214574912766  
0.4536545328963665 0.6251530560110885 0.4834219860357014  
0.6185505333176337 0.5402180562913124 0.4921674214730513  
0.6734237968325640 0.5675680695968767 0.4945290050287441  
0.5062539275676682 0.5266526220341170 0.4400302901392383  
0.6576935345337653 0.6086619280104846 0.3995786996325233  
0.6023603065818696 0.5821397221697407 0.3976619726605150  
0.5423937392565801 0.3752248360657354 0.4854811628817052  
0.5752587011462732 0.3226924309471795 0.4844128187159273  
0.3413424853706326 0.3908334924908769 0.3942662759308840  
0.6093205909941790 0.3467491844373861 0.3886453356430907  
0.5775527508831695 0.3998368838249383 0.3902772544454350  
0.3961908003238749 0.4185210428091738 0.3941919538762220  
0.1587632487062461 0.3290713893325570 0.4448450130409687  
0.7042978396592656 0.1778877920265643 0.4310258187731330  
0.7134310474151102 0.6017884451299697 0.4248510122418442  
0.7647690400354390 0.6269715683515474 0.5146084115779296  
0.8217478252103820 0.6492680026115967 0.5065987261201448  
0.8394456715241031 0.6688034208560234 0.4520244550661521  
0.8002716098823393 0.6652919609801563 0.4057231179066342  
0.7442788614841293 0.6423179910837882 0.4135143356531060  
0.6240591104315395 0.2962557526699877 0.4596194117096267  
0.6133853454219599 0.2166101528860585 0.3913179642117318  
0.6523629098236762 0.1689394707017141 0.3998005327896182  
0.6766321550315885 0.2808832869730366 0.4476999566510920  
0.7162818919856832 0.2341292770801841 0.4547285528459901  
0.2855592407050652 0.3934001660130753 0.4179529022371875  
0.2318808376267834 0.4058674105309241 0.4288771677628349  
0.1752286980891767 0.3840305169111271 0.4209196130750681  
0.2559323235997245 0.3192982212144085 0.4866663065997993  
0.1994567120552167 0.2963226100182985 0.4773075237471883  
0.3752456429607262 0.7066012644804147 0.4560730485345500  
0.3238758500375010 0.7249000384451301 0.4450547100085913  
0.2867567078240049 0.7737834449162301 0.4516584276911355  
0.3890244660801959 0.7843797229377875 0.3859279262331127  
0.3525866229235626 0.8341721162623246 0.3938612060901321  
0.3009770141220827 0.8287264396877329 0.4263400752555798  
0.6289611505028141 0.4961118360841477 0.4429331542445604  
0.3216525576524629 0.4314530617516167 0.4887189916881944  
0.3698030014985916 0.4807626922951426 0.5602293191880096  
0.3877510697783121 0.4374040652327741 0.6093005377432279  
0.6216405867780603 0.4549095654931024 0.5609041813942428  
0.4532968551223693 0.3767186958205681 0.5605838684397884  
0.5193197455675728 0.3698915339280102 0.5589132074020906  
0.3764045769610112 0.5477733754048748 0.5588131456947567  
0.4788224660130870 0.6328676214662147 0.5593085998668113  
0.5447581252554485 0.6259814045838255 0.5629385135000206  
0.4024729825376060 0.5855498112926764 0.5098242443240171  
0.3627152316142703 0.6327325417359467 0.5079221413309761  
0.4964025489118003 0.4740101905592627 0.5601960278917835  
0.3926272435306374 0.6627872753954220 0.6034533592588951  
0.4333363718733294 0.6163071369799342 0.6048044241410045  
0.6098356004220017 0.5633053658450736 0.6122984459498905  
0.6589234621112052 0.6003266513737725 0.6144415951350979  
0.5016668952586546 0.5287229994383034 0.5606183946641129  
0.6361978109683722 0.6370689907987667 0.5192002799802621  
0.5864253968721755 0.6008904727397810 0.5175579624153335  
0.5641778421425981 0.3866165207641687 0.6057608050220922  
0.6050399450919995 0.3402044199803801 0.6050208552572356  
0.3635124771162945 0.3657684756469842 0.5140371204168828  
0.6361060237533911 0.3701592560773444 0.5098052778845158  
0.5961244138855646 0.4171996381481859 0.5110737860903524  
0.4124785161539400 0.4032198003370238 0.5136975135124888  
0.1954617997413333 0.2713966894323546 0.5673278053169440  
0.7513946399749907 0.2142624198507079 0.5513519698678853  
0.6919170703481997 0.6410112690428112 0.5442863491554586  
0.7376226745799465 0.6765346944985408 0.6343338299335710  
0.7898116180785794 0.7087262728169452 0.6262602779871959  
0.8047670529386471 0.7293205874928674 0.5712418938036689  
0.7676872984581877 0.7170584755110160 0.5246470077946788

0.7165784669632900 0.6845738300812728 0.5325540155157126  
0.6573379664381628 0.3214764114841888 0.5803624011588853  
0.6560200412984125 0.2411439535215647 0.5126469590729644  
0.7004153481472808 0.1986611756283742 0.5210482130780597  
0.7120836322454372 0.3134225892198987 0.5672903197689385  
0.7570984093596240 0.2719188649900248 0.5741447619688460  
0.3085997984286293 0.3574615495032407 0.5391173274722453  
0.2543978197293171 0.3599464707635190 0.5516014348779926  
0.2019118422307674 0.3289567683216664 0.5445085028991588  
0.2940849228876069 0.2773711455430707 0.6064772888215120  
0.2419265027423376 0.2452934200365203 0.5979052242998686  
0.3405220846282356 0.6812040190651607 0.5782041146449836  
0.2866558463995605 0.6891594317083742 0.5662381572965486  
0.2410677422174705 0.7299642739173888 0.5729387085619094  
0.3405571625824010 0.7611403218840316 0.5091941170017321  
0.2954403112597228 0.8029374928394105 0.5172245552622363  
0.2452668413609904 0.7871212331254663 0.5486869893922108  
0.6282635620913237 0.5218599524030285 0.5632923879493911  
0.3395923902105245 0.3990924162858510 0.6101769266093587  
0.3759409438443470 0.4570812857809968 0.6824945679087753  
0.4000668737262521 0.4176346089003869 0.7313224471016122  
0.6282836804867067 0.4765445178784196 0.6831444411722211  
0.4760743402365690 0.3695130915989707 0.6837626456021569  
0.5422409554279457 0.3745952745229491 0.6820961104903819  
0.3709332490863680 0.5242277025770992 0.6812102336914017  
0.4570308287602245 0.6262183593483371 0.6824929192756705  
0.5231259807893123 0.6312715719357518 0.6858145806740908  
0.3910980728074426 0.5665377095111941 0.6320360481801081  
0.3437587804038971 0.6058029213180619 0.6296765896011092  
0.5016626668589775 0.4730052419939248 0.6832566899010295  
0.3663794584461231 0.6398823740618214 0.7259021095116627  
0.4144067609262947 0.6013376679548185 0.7277808935185285  
0.5988491622299524 0.5817007935390092 0.7338428473686975  
0.6403605238602388 0.6272869916756929 0.7351414071695724  
0.4975945273883778 0.5278008001855863 0.6833590218912472  
0.6099355674838494 0.6586261788028868 0.6401523989966423  
0.5675855241353962 0.6136992420243076 0.6393736348179037  
0.5841097610961326 0.3991883846797649 0.7286736919563478  
0.6319536407250510 0.3603347150760204 0.7270632300476304  
0.3902930821678757 0.3428367514987241 0.6358723570864818  
0.6560523961545276 0.3952133345263869 0.6314573875014866  
0.6088678528712582 0.4346985738043849 0.6335231955601810  
0.4320338620988926 0.3884199022779824 0.636240001876727  
0.2432950042949087 0.2167383335358196 0.6857105321274130  
0.7985971961719441 0.2647873825479150 0.6722506656619618  
0.6640628728081163 0.6737917339082794 0.6646474046808666  
0.7041167595833491 0.7160631848081751 0.7544320290736178  
0.7492108579065119 0.7578170155730727 0.7460227857545954  
0.7585746616743928 0.7821481334042089 0.6912284671654794  
0.7231680463400939 0.7640628724026475 0.6451642732017125  
0.6792360486375508 0.7221200385462342 0.6533479384068495  
0.6864254569422075 0.3513807634155517 0.7015910097493770  
0.7003604615530583 0.2729363404541426 0.6325199619412513  
0.7521296939057390 0.2400636894827312 0.6406565119740868  
0.7406142845381128 0.3536824701601040 0.6895009777790654  
0.7926423992937002 0.3217863484078001 0.6964117983661656  
0.3380798794702993 0.3239868435211358 0.6599549535270822  
0.2828420963747798 0.3162135325229530 0.6723754038449852  
0.2379048764289401 0.2749095814125030 0.6640931486133828  
0.3381718530035400 0.2426911438229217 0.7261844486551221  
0.2939051293147049 0.2003781572347980 0.7162346950506663  
0.3126183258973103 0.6489011966123092 0.7002926917123085  
0.2581985935497228 0.6467520822879123 0.6893490695836216  
0.2063785327797162 0.6787846422445555 0.6969865353161188  
0.2974566062142060 0.7269559916159214 0.6310164467955308  
0.2458958810453135 0.7599437023136371 0.6398093185233571  
0.200006970145403 0.7355859823223422 0.6724658312062044  
0.6233133300453498 0.5436578644457859 0.6848543254015673  
0.3593194127491788 0.3712984689803339 0.7315435088688410  
0.3870674959936652 0.4339531579394704 0.8143451982608879  
0.4298327536556878 0.3926697194831459 0.8670340294835484  
0.6315249215144528 0.4996221010922621 0.8153381558039990  
0.5001825951680273 0.3666307902960650 0.8140825386865610  
0.5646828308980149 0.3831907660672665 0.8123906932278206  
0.3697127963037559 0.4991792443752581 0.8122351611084595  
0.4365859690889404 0.6156631046595250 0.8131999515493672  
0.5009907076653840 0.6322033214480333 0.8168706709768505

0.3851548963487918 0.5476528866714331 0.7609384103816705  
0.3336457115501388 0.5806432093239084 0.7555589137517090  
0.5082987600671666 0.4730686338928299 0.8156469095279424  
0.3438667325977791 0.6133753043999590 0.8543884713682087  
0.3955889544857285 0.5807534961155858 0.8593423822773784  
0.5753246543298774 0.6043472210210531 0.8689385489700797  
0.6105738665210882 0.6553435862396237 0.8680241902784798  
0.4929297263252576 0.5257526055154614 0.8159338441952179  
0.5920772390103343 0.6658444308768402 0.7660551950750957  
0.5558338224833459 0.6159389747547150 0.7674112677228572  
0.6054929349689669 0.4175220214876904 0.8602024569837194  
0.6572183664534863 0.3849047199479753 0.8550281278489998  
0.4072759076125730 0.3332783159428110 0.7639752795667509  
0.6677607503887255 0.4188653194635917 0.7566073411537939  
0.6162929784409217 0.4518664420761118 0.7622403922237514  
0.4420444060077279 0.3843688743059125 0.7641393173836760  
0.2819525723193433 0.1846635617797907 0.8166678202443676  
0.8207820763145391 0.2952627915020427 0.8043728265334349  
0.6311632128473421 0.6978314191553572 0.7906485003248966  
0.6796690543821102 0.7447144830512681 0.8745766153850880  
0.7118633712534022 0.7967580738254753 0.8617974803614987  
0.7062565152079597 0.8234238199882988 0.8075379857265133  
0.6693006028474308 0.7976102819629093 0.7663147258303480  
0.6383188343445858 0.7461557284924464 0.7787033594851078  
0.7048793877651803 0.3741053312313295 0.8259350420363891  
0.7306183957419695 0.3084782406686568 0.7502689478395131  
0.7813079190616111 0.2753257503101613 0.7622946182577172  
0.7588156620528781 0.3810422815157699 0.8224326682344827  
0.8093595807736844 0.3483513270256906 0.8341741232555200  
0.3713791893991901 0.2988051763648913 0.7909494172832556  
0.3251013912658529 0.2781699655092315 0.7863020239898518  
0.2849354542564835 0.2326177166404339 0.7781049574052706  
0.3597357830086630 0.2300701607330847 0.8732110567868201  
0.3198035637734264 0.1829947928424329 0.8641943302842543  
0.2964465993670764 0.6246181627072948 0.8254057473678069  
0.2425733646964849 0.6175706346552498 0.8223570854285676  
0.1920995115093139 0.6501201664045179 0.8346667844083850  
0.2699259406484905 0.6904163073486204 0.7501458008561332  
0.2193095117810843 0.7234447479581569 0.7627665554308550  
0.1802816199054121 0.7033011757767502 0.8051515670749835  
0.6142088938135655 0.5647734816353431 0.8181422352697963  
0.3964994911221536 0.3404687056190852 0.8673279644623579

N-CENTERED HEPTAMER

|                     |                    |                    |    |
|---------------------|--------------------|--------------------|----|
| 1.000000000000000   |                    |                    |    |
| 40.412861999999970  | 0.000000000000000  | 0.000000000000000  |    |
| 0.000000000000000   | 40.391460000000021 | 0.000000000000000  |    |
| 0.000000000000000   | 0.000000000000000  | 48.258234000000016 |    |
| C                   | H                  | N                  | O  |
| 504                 | 350                | 56                 | 28 |
| Direct              |                    |                    |    |
| 0.1811139292801284  | 0.5891279518328386 | 0.1834321275890624 |    |
| 0.1968179390489108  | 0.5374730087476757 | 0.2196444111801652 |    |
| 0.1638242131257844  | 0.5455186000791796 | 0.2145830486033017 |    |
| 0.5454741064942147  | 0.7434167414954751 | 0.1486258811602092 |    |
| 0.5458563675462950  | 0.7799812991885454 | 0.1543269415130873 |    |
| 0.5293249069487731  | 0.7949650381978425 | 0.1766152712340389 |    |
| 0.5295829863792535  | 0.8293810951450125 | 0.1794842731500585 |    |
| 0.5626631776359421  | 0.7999637728707161 | 0.1351223033635497 |    |
| 0.5633343883614549  | 0.8342276576476432 | 0.1382950027275361 |    |
| 0.5466445206319560  | 0.8490534483574530 | 0.1604502954902996 |    |
| 0.5430033317142741  | 0.4020064166235324 | 0.1820441640767407 |    |
| 0.4555757931126302  | 0.4389041301387048 | 0.1785477301320461 |    |
| 0.4251924642204994  | 0.4859365207965496 | 0.1801890066239608 |    |
| 0.4028124269821650  | 0.4583442826176956 | 0.1802549318892986 |    |
| 0.4212650293265107  | 0.4298185311124064 | 0.1789641468779559 |    |
| 0.5774736353829981  | 0.5143304648433913 | 0.1827013028315603 |    |
| 0.5472987967505888  | 0.5612979508817986 | 0.1786198543033316 |    |
| 0.5816257446933289  | 0.5702992701868178 | 0.1792411631459787 |    |
| 0.5999307187822760  | 0.5418316745477579 | 0.1820552051141428 |    |
| 0.4404458633528106  | 0.5459146257957551 | 0.1802827933086502 |    |
| 0.4310718446706984  | 0.5807380076003502 | 0.1795535962467653 |    |
| 0.4597451913538539  | 0.5981956683681710 | 0.1776887731948360 |    |
| 0.5621673365735905  | 0.4543855674089885 | 0.1841275960588076 |    |
| 0.5163188927434962  | 0.4262555284953002 | 0.1805218143881523 |    |
| 0.5715708844180973  | 0.4195448223268576 | 0.1844751060321020 |    |
| 0.4864700376227918  | 0.5739104942900987 | 0.1774848056648255 |    |
| 0.52024442985278379 | 0.5830580492874979 | 0.1767811393074018 |    |
| 0.4171901340340736  | 0.5198124117448789 | 0.1812176889997743 |    |
| 0.4826471041717190  | 0.4170851179221806 | 0.1786244340950038 |    |
| 0.5853826099360797  | 0.4805216167650376 | 0.1849910727776817 |    |
| 0.5278338026858657  | 0.6192021919039862 | 0.1745984512026374 |    |
| 0.5242390019053140  | 0.6360282818340217 | 0.1493496856097921 |    |
| 0.5289755659368204  | 0.6701296213953658 | 0.1472800024991269 |    |
| 0.5370024695243476  | 0.6884919486664572 | 0.1710969040894229 |    |
| 0.5413676640308206  | 0.6718242582109816 | 0.1963918808739054 |    |
| 0.5371113571524733  | 0.6376722234228597 | 0.1979649581247165 |    |
| 0.6211614187005137  | 0.4722093010269404 | 0.1887722017999974 |    |
| 0.6330666475163267  | 0.4619268017878426 | 0.2147101252945343 |    |
| 0.6664786292533518  | 0.4550168139477411 | 0.2191264951652041 |    |
| 0.6889449652392954  | 0.4580613580496732 | 0.1971566500411076 |    |
| 0.6773474038700994  | 0.4677636628542509 | 0.1709692842771390 |    |
| 0.6439475991233066  | 0.4748369635465469 | 0.1669141577946830 |    |
| 0.4748318054156971  | 0.3808667560764410 | 0.1775574019034636 |    |
| 0.4706343721666835  | 0.3626230271428199 | 0.2020277379618152 |    |
| 0.4653455213858659  | 0.3285878109105632 | 0.2013380560136991 |    |
| 0.4637084598667077  | 0.3117645807513638 | 0.1758852600506336 |    |
| 0.4668577008206423  | 0.3298887107612132 | 0.1511508111419121 |    |
| 0.4725152385503016  | 0.3639426855830064 | 0.1522732659833458 |    |
| 0.3812511142426793  | 0.5281695998643208 | 0.1836032475185703 |    |
| 0.3595697346209469  | 0.5241392276902940 | 0.1611174992857271 |    |
| 0.3259475955286972  | 0.5310157524422807 | 0.1637929304120460 |    |
| 0.3129866257771226  | 0.5419107011318748 | 0.1891863521709909 |    |
| 0.3343365223928399  | 0.5463887161115260 | 0.2117515176011623 |    |
| 0.3680142249071426  | 0.5396797703090611 | 0.2087260058698649 |    |
| 0.1558845110748602  | 0.5713581723898854 | 0.1964843462917402 |    |
| 0.7427919388850653  | 0.4517397343611079 | 0.2229290746879002 |    |
| 0.7779543217709191  | 0.4411038427815555 | 0.2182377296163707 |    |
| 0.7945052582090348  | 0.4258426483169159 | 0.2403686396968516 |    |
| 0.8270877634342059  | 0.4151380422450727 | 0.2373250380014383 |    |
| 0.84374422945494825 | 0.4200154113380294 | 0.2122735069138468 |    |
| 0.8276655082616576  | 0.4357354287409710 | 0.1902760086245651 |    |
| 0.7949130589502594  | 0.4461215661689941 | 0.1931849438093082 |    |
| 0.4500362034732349  | 0.2567506830068209 | 0.1553372618012637 |    |
| 0.4510340818743506  | 0.2201916680791625 | 0.1610939870342581 |    |
| 0.4316357788380553  | 0.1998649649510311 | 0.1439678236173807 |    |
| 0.4321794001836242  | 0.1655900153254080 | 0.1470933886954050 |    |
| 0.4712875320935210  | 0.2055147067728274 | 0.1812716232920320 |    |
| 0.4721406058040621  | 0.1711053462325251 | 0.1841012923970575 |    |
| 0.4525677336438807  | 0.1510925608342233 | 0.1671231617686289 |    |

0.2574060593983938 0.5453831739738640 0.2125177232015610  
0.2222916638707789 0.5548508182457289 0.2062931044829200  
0.2141592871816800 0.5808502451975255 0.1882014029079985  
0.1732665853153083 0.5463935939644404 0.2939059490493333  
0.1928837820650307 0.4895585671045670 0.3224939868466745  
0.1593494681408976 0.4963568594180016 0.3188675958688671  
0.5083868265350672 0.7474981939388868 0.2605375496068909  
0.5030780424289297 0.7837825589126381 0.2654544901053061  
0.4753009371460125 0.7959497569826963 0.2796002136028915  
0.4704938983510848 0.8300329522408503 0.2823334722427993  
0.5260944173454792 0.8061572722514830 0.2543634368053861  
0.5216325293434783 0.8401412055826507 0.2576887214165807  
0.4936935524806677 0.8521726853579419 0.2715289268146998  
0.5624733673470855 0.4126711555295289 0.2934288710526476  
0.4691277961163777 0.4297310921170813 0.2896599437446434  
0.4299743229339841 0.4698044053300454 0.2907553549555156  
0.4135601519073565 0.4383129973751416 0.2904835112699204  
0.4373033967355250 0.4140246484408101 0.2893220177803999  
0.5718050506823613 0.5300500949509608 0.2941763231841995  
0.5328504137281018 0.5699545901739793 0.2896201077719915  
0.5646136132960724 0.5857171700386534 0.2907882617031853  
0.5881907758571208 0.5615444784510681 0.2940362719060619  
0.4322032594410491 0.5318374394787519 0.2901710090364040  
0.4153681529538145 0.5637176895478253 0.2887939085773493  
0.4394717721393043 0.5871028813558918 0.2871586200969075  
0.5695953608979140 0.4680311344065499 0.2951762568887783  
0.5311344936990910 0.4303843462936313 0.2915082193526110  
0.5864445209933760 0.4361202760787884 0.2955911527652347  
0.4708826236714070 0.5693624753763605 0.2875149685741958  
0.5018767495569524 0.5856181012701753 0.2872585129982320  
0.4150990790708752 0.5013062308541720 0.2912935603292329  
0.5002336388007873 0.4140452619466582 0.2897625828765355  
0.5866230460751406 0.4986181811900098 0.2963145696012184  
0.5021241924690917 0.6224812568990911 0.2852662205839142  
0.4910794503388388 0.6387613128609775 0.2612577071492276  
0.4907821072371663 0.6732110749013114 0.2594847611327056  
0.5011688421105535 0.6922496907784674 0.2821547955997277  
0.5122849376522769 0.6763520718095136 0.3062220780962453  
0.5129325529599691 0.6419384862748051 0.3076008692133094  
0.6233425530521390 0.4976801049694841 0.2993439685955143  
0.6382039638857689 0.4843396907401152 0.3231813111641066  
0.6724915888786248 0.4821354883480700 0.3257844606517125  
0.6928333644653034 0.4931835910879714 0.3041839526655646  
0.6784085152818984 0.5070197150385062 0.2804494648089791  
0.6441527755153393 0.5093170805306997 0.2781648895645198  
0.5003574967789670 0.3771251803955504 0.2885641413084435  
0.4873176691279171 0.3580455917963782 0.3102945434381629  
0.4884766111106976 0.3235922076955305 0.3095476834206908  
0.5024174843383310 0.3072888718805399 0.2867502209462397  
0.5151257231093176 0.3259403522059612 0.2647044314009206  
0.5142594347728549 0.3604015499107070 0.2658256705436259  
0.3782198655003573 0.5023592587919107 0.2928347937188849  
0.3585151617874585 0.4909744797358179 0.2708516271511943  
0.3241369552857909 0.4931317240488982 0.2719748089464069  
0.3085592335713000 0.5065411923052207 0.2953575902608158  
0.3278202895547739 0.5174483928408057 0.3176864929125839  
0.3622082405219133 0.5154735168889550 0.3162410273024498  
0.1494453416930670 0.5248827296101344 0.3046774149256382  
0.7481294859280131 0.4928489924417359 0.3269264588734209  
0.7842075929599311 0.4866134032529192 0.3215865615196679  
0.8035569985124987 0.4754067292401192 0.3438406629286028  
0.8372917000422537 0.4695592057803195 0.3403708142881894  
0.8522579306223954 0.4753523658347407 0.3147024655487943  
0.8332689087906893 0.4869206127675503 0.2925305321023925  
0.7993893432731011 0.4923656275970398 0.2958718428749910  
0.4965563917756881 0.2518450631924435 0.2655582562039006  
0.5024799488003330 0.2156727144081504 0.2705705221627696  
0.4801414539649557 0.1928340100809446 0.2591746189708710  
0.4852430696223966 0.1589467388592500 0.2625630849150506  
0.5302288751418770 0.2040717163337522 0.2850887716031484  
0.5356863091127955 0.1700968621800305 0.2878942508512639  
0.5131450272248252 0.1474916481984450 0.2767890641463000  
0.2526846000639844 0.5029064369749385 0.3165174384839734  
0.2169268969167049 0.5108062210948571 0.3113933920525399  
0.2068849495951463 0.5392693760721886 0.2969935659778055  
0.1685967746269221 0.4875105915256724 0.3959973231517364  
0.1975946381119131 0.4368486645442389 0.4269907496651921

0.1634142165043872 0.4374393273701705 0.4231549319049826  
0.4629578109748178 0.7446163748644011 0.3650054012131323  
0.4500501200694006 0.7790121519115210 0.3694833412513441  
0.4215190617537513 0.7854591190000036 0.3851527403770630  
0.4095181153574490 0.8177574429480573 0.3875256273854353  
0.4664583989989698 0.8053550860564449 0.3564261829098276  
0.4548342432129974 0.8376511803732356 0.3593238208852690  
0.4262148510827568 0.8439144364831099 0.3747597519885369  
0.5747241941476039 0.4237942408365051 0.3982094694068329  
0.4797623337485405 0.4256994689631133 0.3958967443496563  
0.4345520330740684 0.4587743921570128 0.3973302984820937  
0.4235380145694477 0.4250229861514050 0.3970138583607730  
0.4509446070369318 0.4049809573801908 0.3956685530490859  
0.5650526365536009 0.5410725055663367 0.3998643851709281  
0.5200403797325276 0.5740990537139765 0.3956186000266839  
0.5488788319146632 0.5947843483282456 0.3962529853013276  
0.5761168754272156 0.5747919428089258 0.3993232066166567  
0.4266527546400098 0.5202957925543485 0.3967412154903150  
0.4049497298758521 0.5490660914562374 0.3953292315538790  
0.4250035629383894 0.5760139278015307 0.3937894371837087  
0.5728963226371139 0.4795504165397950 0.4006882874995765  
0.5409078806246496 0.4362642990503187 0.3969589313981000  
0.5946528751116218 0.4507575733585658 0.4004718054233771  
0.4588676869329947 0.5635448366583116 0.3940825934385301  
0.4868955982614332 0.5845591646505164 0.3934831063942267  
0.4146735313562182 0.4874025849934776 0.3977176776686099  
0.5129782594532756 0.4152362987895440 0.3953841318731143  
0.5848296428240031 0.5124673580048547 0.4017900547792531  
0.4810980870179219 0.6209329896871493 0.3910496066330416  
0.4661073573750875 0.6344938292856548 0.3673466017662321  
0.4596216212697243 0.6682874374107108 0.3652539875628255  
0.4677275846503359 0.6894294635418656 0.3872498919433525  
0.4830287584660864 0.6763606078160596 0.4108938097929209  
0.4897492686528974 0.6426131120818533 0.4126153590770394  
0.6212952301999932 0.5174494628023922 0.4043046157739175  
0.6386335011951589 0.5064981829045571 0.4278294559150390  
0.6728756123347978 0.5098881271331673 0.4299338502568336  
0.6907472433192160 0.5241964632847533 0.4081286332061311  
0.6737681570434012 0.5355837026353897 0.3846690764117097  
0.6395276553176100 0.5323814775837572 0.3829100563893043  
0.5189399197896263 0.3788119450142747 0.3936461725975772  
0.5100904589949062 0.3576586840012303 0.4155086575013252  
0.5169854855150552 0.3239001255330216 0.4144169680785530  
0.5326086829883958 0.3103506317345544 0.3911152938510803  
0.5409373843395352 0.3309894189294968 0.3688461280120183  
0.5343053257159323 0.3647953592111867 0.3703106075147772  
0.3781101486196819 0.4822600055919751 0.3985679792464371  
0.3614102170137994 0.4669622699957410 0.3764935181623713  
0.3271945022092770 0.4628450230770080 0.3769627043824013  
0.3087679615522733 0.4736764105244722 0.3998191220489017  
0.3250695677160682 0.4886292418157874 0.4221702908625483  
0.3592656440874233 0.4929636776770966 0.4213481300618879  
0.1488053685059865 0.4628907379786530 0.4077679460812982  
0.7454661665668896 0.5339037883209924 0.4302242455424162  
0.7820806211473854 0.5339693616724980 0.4247998077459915  
0.8031157320359227 0.5278190716905609 0.4473635968498196  
0.8373559302716375 0.5279897631352687 0.4439348136450508  
0.8510681044192289 0.5348407435911638 0.4179610764465599  
0.8303298719718905 0.5413512301100768 0.3954470905826208  
0.7960130175768848 0.5407530883911378 0.3987626724152471  
0.5376060711075556 0.2548519741978354 0.3696395856803522  
0.5504840276056084 0.2205395830838356 0.3745074627848481  
0.5342045588733852 0.1940086237835447 0.3616147701488305  
0.5458256034090975 0.1617621455954655 0.3649057047865624  
0.5788706633291781 0.2143384656721128 0.3904251670027697  
0.5908441406391803 0.1820820305525887 0.3932215805362499  
0.5742735595322425 0.1557325162413750 0.3806242973396334  
0.2541755819885714 0.4602047530331930 0.4204140392440068  
0.2176566802772458 0.4612571983147892 0.4149298857603888  
0.2029124165919077 0.4865631621070254 0.3993012127618533  
0.1751256679017899 0.4338591606315824 0.5008561148468816  
0.2125202958928616 0.3890708376048256 0.5318770267266236  
0.1786997034404501 0.3838711414108331 0.5283031212986473  
0.4207819525227142 0.7352451086217229 0.4693106441137691  
0.4022375394825891 0.7669199922019881 0.4739668009963960  
0.3725284422203479 0.7681419941153608 0.4889759054863813  
0.3553131447969852 0.7979654446490991 0.4915524095621125

0.4145216326539257 0.7959569635619141 0.4617669014746966  
0.3976590468690472 0.8258209476646651 0.4648811339022333  
0.3679092788419360 0.8268645288615915 0.4796673526770679  
0.5868526540227162 0.4383593608251014 0.5008142049588787  
0.4929914957306689 0.4237327724056933 0.4982225618032699  
0.4427527881241628 0.4485546298865773 0.4997419925849687  
0.4377043600485940 0.4134118375058695 0.4995501741533322  
0.4681458127126335 0.3983722540892937 0.4981522862564687  
0.5570927948172352 0.5522863653435900 0.5023433203637993  
0.5070439355004589 0.5771074357872094 0.4982003644283615  
0.5318773157518952 0.6024510878843066 0.4991466734246000  
0.5621555877779751 0.5874257570280035 0.5021586346611420  
0.4244120223649154 0.5078242255302604 0.4993001195025679  
0.3980423256139535 0.5324120549219633 0.4980847390398567  
0.4131219010364278 0.5624197268161628 0.4964842848365876  
0.5754337148322297 0.4929899130189008 0.5030664961927879  
0.5513937082151803 0.4447920780724868 0.4994180811960145  
0.6018301890887215 0.4683677158797128 0.5030078360884549  
0.4486404622152632 0.5560115128157572 0.4966044406793609  
0.4725671639144577 0.5816197598114029 0.4961302590862911  
0.4182668211151892 0.4733554206430086 0.5004012650040274  
0.5275350130337405 0.4192037019054948 0.4978852803840393  
0.5815056168336179 0.5274950632576983 0.5042443337973007  
0.4603615652819188 0.6164134793486404 0.4940761317311900  
0.4431871839282794 0.6274065427429713 0.4704812352138537  
0.4306446184707864 0.6594798651581427 0.4687535373666099  
0.4347074935138854 0.6813774961005654 0.4910083959499134  
0.4519970043671095 0.6708921066899223 0.5145931656820222  
0.4647797632090978 0.6389100984517402 0.5159549749506068  
0.6165447916284751 0.5387138539352085 0.5069863676058814  
0.6353122100832697 0.5308234017846030 0.5306048760052255  
0.6684518086172108 0.5400006280787900 0.5329044764240625  
0.6837810836105073 0.5571992087745833 0.5112118492050537  
0.6652821049588462 0.5656715850815519 0.4876992109601996  
0.6321076787839027 0.5566656514104915 0.4857351551090073  
0.5397886841223403 0.3843594877935643 0.4964788386165506  
0.5345559942175570 0.3621970090205474 0.5184607232845440  
0.5472084337244384 0.3301263214131820 0.5176682636613925  
0.5651812237657819 0.3192608460323586 0.4945712115667933  
0.5700547553752672 0.3408430085669787 0.4722135203336524  
0.5576369495328496 0.3730002171461833 0.4733598681041389  
0.3831042731432692 0.4621485334632825 0.5017984909634308  
0.3686326834255001 0.4444694901147039 0.4798705831208794  
0.3354713168122038 0.4351298805635361 0.4806894588409920  
0.3159478802646196 0.4429437677063492 0.5037706901312989  
0.3301389689315480 0.4600504559444048 0.5260567108637703  
0.3632351775379811 0.4696321227157482 0.5248694540083487  
0.1598712354423227 0.4063864468583802 0.5129284223883112  
0.7359382076715882 0.5758593095749972 0.5335868704418000  
0.7719895730263443 0.5823245103209815 0.5282772517158451  
0.7936883675434004 0.5801577211479171 0.5509144751791704  
0.8273416197625506 0.5865555678007891 0.5475647576495405  
0.8396909915135332 0.5956633201225260 0.5215947210492163  
0.8182273026029673 0.5981552774710194 0.4989949862018708  
0.7845812217587640 0.5913706014158652 0.5022420149207486  
0.5792840433936118 0.2650226090256674 0.4736731475151431  
0.5980844529259055 0.2335751685386681 0.4787070659970553  
0.5860514075201535 0.2041428024288386 0.4670069271359302  
0.6034286379254619 0.1745992571472328 0.4703041198488799  
0.6279988257922592 0.2330455474179014 0.4934609152686164  
0.6457376717258488 0.2035549665007875 0.4961931860033136  
0.6334337745306305 0.1742747848363050 0.4847542559223009  
0.2642665512626133 0.4215460915044264 0.5248704698462411  
0.2280606117528405 0.4164252608403454 0.5195608255067271  
0.2091427450405906 0.4387316022435100 0.5038855180612359  
0.1912159946680744 0.3776343179642303 0.6053137573461230  
0.2364051781209194 0.3395278643687262 0.6353094448036943  
0.2040774957624527 0.3283368630155422 0.6316572200685880  
0.3811289343067173 0.7186825929593870 0.5732270308654511  
0.3580065120753184 0.7471464477710168 0.5781123205457085  
0.3287696043554377 0.7438659102588663 0.5935593777496231  
0.3071969929363129 0.7706769580106912 0.5963042164905268  
0.3654071937512922 0.7776649743465586 0.5656817338785939  
0.3441898683727909 0.8045820454799029 0.5689703105942155  
0.3149223290440533 0.8011025358477430 0.5841642235035754  
0.5953099378008075 0.4545968205556020 0.6049260646184444  
0.5055268433373603 0.4236870221167067 0.6024521011243874



0.4518016861865643 0.4395305435839972 0.6040103905925528  
0.4528503613616849 0.4040349001892353 0.6038147219287829  
0.4854173155468918 0.3944309860761784 0.6024172758177994  
0.5460350841131328 0.5615161240754742 0.6064422578588859  
0.4925071656332939 0.5773798906459130 0.6023542087417073  
0.5126396897717889 0.6066209217258317 0.6030799450656438  
0.5450435374011430 0.5969980831005574 0.6060367069068892  
0.4234144856784497 0.4947490938231722 0.6037044798140997  
0.3931098109183362 0.5142889202098669 0.6025941132385556  
0.4026405141692976 0.5464935349886197 0.6009780708925055  
0.5743877099592564 0.5063099883223620 0.6072330789286645  
0.5592705268496770 0.4546363775746930 0.6035874156061520  
0.6047332392071613 0.4867837933952196 0.6071200555351012  
0.4387175940971049 0.5464499369363435 0.6009792054144985  
0.4577827129216016 0.5758332316850494 0.6003731531615213  
0.4234254436201834 0.4597363333939117 0.6047046873882496  
0.5403147945646517 0.4252532902776847 0.6020433114263015  
0.5743373927893444 0.5413280153975876 0.6083595432711814  
0.4398226618933712 0.6080069017455287 0.5982563313084472  
0.4211717423473285 0.6159841826010186 0.5746041940183229  
0.4035819822362533 0.6455876014734395 0.5727827703941358  
0.4039516014390919 0.6678968032254161 0.5950101901163083  
0.4226505973781395 0.6604301107204861 0.6186506634263054  
0.4404622756752121 0.6309709684740443 0.6200977246089728  
0.6069558180344859 0.5583942999148127 0.6109401895430244  
0.6265757831368113 0.5544949366571358 0.6347597087454612  
0.6577026217367150 0.5691509782649664 0.6369120926130459  
0.6701209011870035 0.5879621686567178 0.6148427252573498  
0.6506924842094676 0.5923699735343649 0.5910756329443857  
0.6194718791678643 0.5779456616043623 0.5892868493228590  
0.5585337821371305 0.3931444582492047 0.6005174285008604  
0.5576058919521527 0.3704151385378950 0.6225181971599529  
0.5757852145623812 0.3411331235309987 0.6215734301153577  
0.5951028690062664 0.3336540353093481 0.5982998510212443  
0.5958440790134995 0.3557731176601858 0.5759576765693826  
0.5779003884789745 0.3851938396826030 0.5772635319434459  
0.3907529490747668 0.4425715902070430 0.6060132411308258  
0.3794423385946952 0.4230604306655287 0.5838757603082492  
0.3483968536335846 0.4081045185076048 0.5846367263793987  
0.3279707896297646 0.4120051378672951 0.6078567965599635  
0.3391133776612158 0.4308909169146641 0.6303423851761804  
0.3700419729466085 0.4460833970102556 0.6292250928278115  
0.1813421360630154 0.3474554832111570 0.6167708064605915  
0.7180942237596262 0.6160003353423801 0.6369206280260173  
0.7526127279132246 0.6282312432752788 0.6315677803097256  
0.7742938386807823 0.6300198396465726 0.6542411358332288  
0.8064972431642856 0.6416818130220542 0.6508217813411149  
0.8172984559947838 0.6522517213751879 0.6247561697310874  
0.7957873433321342 0.6508655837380874 0.6021256188938321  
0.7636704588538631 0.6387645138404726 0.6054348131981290  
0.6179743349870346 0.2826961773109532 0.5771050084281414  
0.6412369560874374 0.2543903551109613 0.5820582847736276  
0.6336775093740333 0.2236477038934099 0.5700960146538149  
0.6550759962623600 0.1968741864109053 0.5733524097169537  
0.6707703242655160 0.2580481329305427 0.5970295697065009  
0.6925207989481010 0.2313729733576944 0.5997323475760931  
0.6846559069410871 0.2007287810740966 0.5880499789145923  
0.2813542945302886 0.3810166745960459 0.6287625219455698  
0.2465978799044880 0.3696144537959854 0.6235564230305439  
0.2237865074148448 0.3885656411381165 0.6084271264913002  
0.2173517757324159 0.3266576025216214 0.7087686735006249  
0.2683228413683780 0.2959756327056743 0.7382335170760860  
0.2383579193672405 0.2795643837752254 0.7342572204583835  
0.3444840076788919 0.6942978713704976 0.6773069236599009  
0.3161586969172737 0.7176437058883861 0.6820131953408286  
0.2876697083726458 0.7083747503947171 0.6967239650715997  
0.2612391246645739 0.7304395310318889 0.6993399569083054  
0.3178524785715433 0.7493029750646520 0.6701398260701922  
0.2917215449016736 0.7715060413937869 0.6732727134790180  
0.2632696776487728 0.7620699138570747 0.6877656422921955  
0.6022084181386587 0.4729932612946394 0.7099526742674362  
0.5193083149233693 0.4266432140963569 0.7072149445688078  
0.4636105279892476 0.4324415403978946 0.7089330900448908  
0.4710613057737634 0.3977348479076697 0.7084693985378545  
0.5048134080409536 0.3942258044689894 0.7069554965946618  
0.5347141627789433 0.5693705302711536 0.7112060454260134  
0.4791849182060005 0.5752471932114024 0.7072366065086736

0.4937099674380487 0.6076450906534077 0.7077265198724049  
0.5273300484019827 0.6040793729467682 0.7106187720497874  
0.4258144708097110 0.4816145307879294 0.7088607168968135  
0.3925359302865098 0.4954816904011222 0.7077526816506480  
0.3962315462215215 0.5288606994476641 0.7061308669932669  
0.5725085885604431 0.5202139357122301 0.7121607396351473  
0.5667211315847168 0.4666992776768393 0.7085589566697843  
0.6058218157486921 0.5063395393967082 0.7121180960314991  
0.4317502207171994 0.5352007610650471 0.7061264660062856  
0.4453022868264424 0.5674838732756400 0.7053407854043634  
0.4320545612902171 0.4471568883120741 0.7096924811727432  
0.5532376178671704 0.4344640215139704 0.7068015593941553  
0.5662042266297921 0.5546551268575165 0.7130796672088224  
0.4218822442190215 0.5959090792779309 0.7029709413077564  
0.4023363827468450 0.6002983060695203 0.6791638358184612  
0.3797177181019392 0.6262384320707326 0.6770966170624976  
0.3759075791921865 0.6483549781164579 0.6992163896737318  
0.3954547726578412 0.6445319752970908 0.7229820343857565  
0.4182061952645021 0.6187262236426420 0.7247076238665293  
0.5952311732360039 0.5773187222411150 0.7153179854903963  
0.6154994176220476 0.5771472103349145 0.7389755397079487  
0.6434865021937564 0.5971952769151638 0.7408397083967926  
0.6521155569871193 0.6177678141027090 0.7185987862123470  
0.6319697467797281 0.6184362450475741 0.6949722602616739  
0.6038245640244730 0.5986313044933176 0.6934913826327935  
0.5768754628044418 0.4061636244567658 0.7048915895830951  
0.5801775973568200 0.383366377335980 0.7266737904889279  
0.6031572659181794 0.3577120917152307 0.7253004303601647  
0.6232649899995160 0.3540737018678126 0.7018483404538315  
0.6198599635005154 0.3762412711859804 0.6797128938852457  
0.5970311218276834 0.4020252950141492 0.6814155910563739  
0.4029768857514924 0.4244089470263999 0.7107392961220745  
0.3953894291177086 0.4034462660734114 0.6884160618906959  
0.3674394498499749 0.3832694796182012 0.6889141115838693  
0.3465015327787834 0.3832309150283311 0.7120544010878198  
0.3540656651419780 0.4035307637826435 0.7347379569020546  
0.3818364774275478 0.4239584958662539 0.7338602069400915  
0.2127108767549855 0.2949681101457811 0.7196667495622899  
0.6945091427746970 0.6538171385491993 0.7404393349527358  
0.7265000930183858 0.6716367407269046 0.7349915485792481  
0.7476470745678528 0.6770122100446549 0.7576213630808215  
0.7774395543690713 0.6938957395254920 0.7541501726810326  
0.7862912748096902 0.7060645938019567 0.7280573641275169  
0.7652687441259406 0.7010711722499130 0.7054634139138471  
0.7356107398032783 0.6838039536026733 0.7088304239266708  
0.6549125707724180 0.3081841381469613 0.6802058448145402  
0.6831636397120938 0.2848277951207671 0.6850787587157069  
0.6815287264645328 0.2530730683094637 0.6733855898293203  
0.7076612672677747 0.2309176645897189 0.6767486815783809  
0.7115689833002572 0.2942530060307437 0.6998210721009348  
0.7379987024022987 0.2722464208455521 0.7026519734411115  
0.7360349003315781 0.2405093290290278 0.6912765904025665  
0.3055726779674954 0.3447345606338999 0.7326476699048581  
0.2732727929059772 0.3276547802729018 0.7270574552685307  
0.2476161476704589 0.3428506373350741 0.7121733684797540  
0.2552093912390576 0.2770387530165411 0.8127662553696957  
0.2996929475590808 0.2658511349285719 0.8559608638999008  
0.2727623220985060 0.2447777214555804 0.8523439316314910  
0.3153133527410676 0.6654437856770286 0.7826411203290693  
0.2857177680297724 0.6867875612125899 0.7884170681145575  
0.2605415915414304 0.6772353985445386 0.8068360743665098  
0.2332214905404622 0.6977235482329612 0.8112102091977348  
0.2828888613319910 0.7170059968247979 0.7742959028040407  
0.2557745657267690 0.7376010571753402 0.7789428032367922  
0.2308915170389567 0.7280411660516042 0.7974153103448125  
0.6059541943976858 0.4921706640596697 0.8208972972889278  
0.5338603823705300 0.4304595715321086 0.8184804785619982  
0.4780407551077423 0.4262867607022168 0.8198575213083832  
0.4915173868682772 0.3934419771664013 0.8190800439546783  
0.5253890436623887 0.3959740749701738 0.8179042793346717  
0.5205574113982274 0.5733414929050189 0.8230848160518329  
0.4648830957807157 0.5692730682602035 0.8190519543106614  
0.4733586810020741 0.6037559778925828 0.8199319767291680  
0.5071126369787458 0.6062030069727010 0.8227112949651320  
0.4314118520076140 0.4673073629202101 0.8194059630536015  
0.3959974345097017 0.4740845614975983 0.8181309831778167  
0.3927899080155665 0.5075225313651307 0.8164611738502388

0.5672019953386080 0.5322953311418601 0.8234529791715404  
0.5725023641065833 0.4787658835653528 0.8197601572908351  
0.6026685749376128 0.5255350527214969 0.8232852633551683  
0.4262604257987311 0.5209711434832635 0.8169500701798580  
0.4331252119963453 0.5552752042574851 0.8166530407398090  
0.4443451191596124 0.4348142783263793 0.8203402314242132  
0.5656880858483634 0.4445275633217820 0.8180789913785967  
0.5542018432757531 0.5647595836955306 0.8246742654544049  
0.4048530659718763 0.5788550872528497 0.8135924739088317  
0.3883074423038225 0.5821948236527725 0.7881501737321684  
0.3625178823064250 0.6047635343103316 0.7845583308531958  
0.3524241294488953 0.6245241809152888 0.8068730880328272  
0.3683329083580099 0.6210695582958662 0.8325713354479790  
0.3942254707334832 0.5986412536956087 0.8358056878937802  
0.5786048087070911 0.5924886627475172 0.8266416009212570  
0.5944376296102105 0.6001512141449223 0.8516828246012833  
0.6191286401684640 0.6242368583226062 0.8532501427729099  
0.6289381808948342 0.6410839230233568 0.8291026862387140  
0.6127436726941468 0.6340393496814947 0.8039990233479257  
0.5878176245661242 0.6103355693820239 0.8029271692960265  
0.5941192218061331 0.4210407865898798 0.8155544887420989  
0.6038719146968951 0.4008291952094915 0.8377708943996000  
0.6299058465877774 0.3784701182750244 0.8349378199479870  
0.6468001594034885 0.3756063279209926 0.8096453130574092  
0.6375973835387480 0.3958349566246519 0.7873558528328067  
0.6116514273949599 0.4182773558756083 0.7905393384214129  
0.4200554444454879 0.4068901148782207 0.8213694758827788  
0.4108423932886640 0.3898539995509619 0.7972523382288756  
0.3865338146445855 0.3654396191714141 0.7979173514213396  
0.3710501090675876 0.3569923658815295 0.8230036447089802  
0.3808275641704088 0.3731046048817568 0.8474904771247428  
0.4048379634219020 0.3978558268549278 0.8463638475119477  
0.2503426965362908 0.2504110924143599 0.8307716878782286  
0.66901516221139298 0.6807887365719874 0.8502829942378775  
0.6949142881414830 0.7062818324924716 0.8432185772752919  
0.7119860661480822 0.7202985392294823 0.8656918364070619  
0.7358797455737945 0.7446330316148332 0.8614641836641945  
0.7430146293731047 0.7555220328048068 0.8346215840439524  
0.7262075430823278 0.7417428194902157 0.8121108516117818  
0.7023332305645853 0.7172422106574666 0.8163062527179498  
0.6840756668875181 0.3349123138938551 0.7855728444969332  
0.7137284324682398 0.3136382671644375 0.7912108590854524  
0.7164374300879316 0.2833314929691731 0.7772115817610933  
0.7437564520662930 0.2629265842004612 0.7815981971493443  
0.7391434412127706 0.3234468799369389 0.8092970648682378  
0.7666912199047728 0.3031687905545469 0.8133687855804229  
0.7689485818881271 0.2727922582922759 0.7996596633488127  
0.3338017793286487 0.3147032108626002 0.8439908598083288  
0.3049252267293245 0.2924945379108004 0.8377942975089683  
0.2824834508156819 0.2979161351470579 0.8160812795285206  
0.4059635110361351 0.5903441882453103 0.1801674779773667  
0.3844553840369795 0.5431713007142870 0.2264488637712755  
0.5399870330812138 0.3752933011984244 0.1812554817065912  
0.3760514258417544 0.4603875585737328 0.1811499665175436  
0.4123432622717523 0.4044740996026015 0.1786448080291394  
0.4627775279636834 0.6248879169993589 0.1766247699318084  
0.5906459861701883 0.5955542176593210 0.1778272697938979  
0.6266598029351458 0.5397437767058002 0.1833922813932699  
0.5172714473501456 0.6221330016213017 0.1308324059810978  
0.5263474455195223 0.6826856675462911 0.1274746359386285  
0.4776671445789980 0.4871005841756718 0.1793600552085932  
0.5471641227486929 0.6860099387459849 0.2150445796123833  
0.5401944375234111 0.6252508511853612 0.2178910964640565  
0.6157521747356586 0.4594120491470236 0.2319564550298413  
0.6751544896757059 0.4475458754674497 0.2395289356218115  
0.5250166456812262 0.5132651977129619 0.1808179092565483  
0.6946800408811293 0.4700140385744074 0.1536680040092490  
0.6353377785814337 0.4824703863301282 0.1464423343387112  
0.4719281540419796 0.3752278844362986 0.2220008059691126  
0.4631533086064520 0.3146361674927819 0.2206510187583786  
0.3094780563125666 0.5276242646873802 0.1460377345900438  
0.4649867643538304 0.3172214552193792 0.1313351203637389  
0.4755667191649803 0.3776227312059046 0.1329145719594432  
0.3692344706636279 0.5154926494214542 0.1412717924305084  
0.1300355316057212 0.5777672949462223 0.1926754270597805  
0.4533478808558125 0.1241966353538342 0.1693743478865816  
0.7344082147502009 0.4432758380623538 0.1820653023808596

0.7813287287267987 0.4224331955434468 0.2598895987564224  
0.8395589105992155 0.4029755529392378 0.2546177921280259  
0.8692965847582166 0.4117037142607763 0.2099100973902238  
0.8407165052961709 0.4400831649570253 0.1708098471746675  
0.7830568721139883 0.4590930002271199 0.1759569848959593  
0.4641742750987964 0.2665886186139935 0.1956130501124354  
0.4165039324719893 0.2117153504551380 0.1280810819924594  
0.4168458819429341 0.1500678955253626 0.1337337982845334  
0.4870258420957693 0.2206163096370529 0.1946632509284699  
0.4883409092096546 0.1599596257461049 0.1996139579736452  
0.2676624225547208 0.5531359966624998 0.1718906830767315  
0.2337034997089321 0.5954609889237029 0.1784313105628803  
0.1750805570812403 0.6096737479432089 0.1696320397804219  
0.2032479793314866 0.5176184381553567 0.2339916297691824  
0.144201732623746 0.5316056540909926 0.2248926885551745  
0.5389104381419736 0.7339587172782354 0.1903204742139533  
0.5156026407291411 0.7800952602134685 0.1916512723898249  
0.5162067889868828 0.8408221680722575 0.1966473341265402  
0.5748681089341944 0.7878623554958513 0.1176779275266161  
0.5767396350243509 0.8494894134873306 0.1233599438397970  
0.5468122367128639 0.8759514663977571 0.1627820950857328  
0.5966432904182321 0.4099953783134858 0.1860538102422182  
0.3246249485217454 0.5547655269755221 0.2315835490099634  
0.3887724116344246 0.5675912383316042 0.2890845187158366  
0.3770564559611537 0.5243651766902242 0.3336188660710624  
0.5656117462357377 0.3859709867464549 0.2931686654697619  
0.3869238964563665 0.4349719669151124 0.2908809388375811  
0.4333999583020265 0.3874677177069752 0.2884843538632225  
0.4364060136945463 0.6137764895614763 0.2859087252733842  
0.5685799463013752 0.6122363477341970 0.2894966741642455  
0.6147138475663427 0.5649697171820471 0.2959752503688122  
0.4825325221492784 0.6241216265566126 0.2436318472684537  
0.4823844546154298 0.6853525700328851 0.2405967052934222  
0.4814853922986028 0.4810408598564617 0.2905878540127413  
0.5196115283514559 0.6911569844200727 0.3241065130858510  
0.5213108332059472 0.6299013816210307 0.3265926989889990  
0.6225216574668165 0.4753164765246451 0.3399897742865505  
0.6834727480591382 0.4717372817380508 0.3444534926549427  
0.5204415169413332 0.5186744217523241 0.2912654508390063  
0.6942178222885190 0.5152805524755071 0.2634722755871499  
0.6332687267300722 0.5195978680714982 0.2593386193080175  
0.4767751838625420 0.3704191894937334 0.3283632914917384  
0.4792296385589563 0.3090853127632075 0.3269763049368052  
0.3091818395359985 0.4850365848322656 0.2544122598811759  
0.5258671583059567 0.3134409689310797 0.2468319592936795  
0.5247015300831762 0.3747282238128818 0.24874274272727138  
0.3703629281161905 0.4808726100809003 0.2523619321806887  
0.1231630542021380 0.5304160875389445 0.3021403913447602  
0.5173830159695989 0.1209259137974472 0.2790789600810705  
0.7377124508982370 0.4817954574195809 0.2860935565588939  
0.7916467031898031 0.4714317516378476 0.3638527693367429  
0.8519995564601237 0.4605917335320719 0.3578033126408221  
0.8787288455177246 0.4709637814229481 0.3119993126817004  
0.8448519512977102 0.4917547222458225 0.2724985663639919  
0.7850104863529371 0.5016873777235217 0.2783728575452083  
0.5098978171222350 0.2620356833820696 0.3061439203490411  
0.4588407381736109 0.2020783853292273 0.2476281617249406  
0.4674889852225576 0.1413680185136953 0.2539306071926662  
0.5479563463395396 0.2215964206927908 0.2938370709845450  
0.5576474652290077 0.1613153483568107 0.2988246286513372  
0.2636445556565232 0.5168367900810105 0.2763998082359155  
0.2253555302611839 0.5562523777943233 0.2885784152094477  
0.1657024499899275 0.5688638754492903 0.2830435487609719  
0.2009020581420353 0.4677374063592941 0.3340007122059742  
0.1408435342924820 0.4794350274060183 0.3273101584614044  
0.4937397000954194 0.7378269678553590 0.3007952442594994  
0.4570388520501238 0.7787982453078112 0.2880946616679645  
0.4485053576251677 0.8392509932874060 0.2929659614656444  
0.5474202947797774 0.7964570001720035 0.2431143232772761  
0.5399354086783051 0.8573419813597135 0.2493269906760006  
0.4899604967705977 0.8788203624416631 0.2737584025593256  
0.6129498788826067 0.4322354590042229 0.2973252624164577  
0.3158972042221563 0.5276092906984198 0.3360615453954247  
0.3780758174255252 0.5486393638104375 0.3955128266105626  
0.3717242131311170 0.5048550135013925 0.4387806317444464  
0.5821136384953788 0.3979592300245030 0.3974269810027316  
0.3978166788723832 0.4173624512287127 0.3975062229549070

0.4514547132891388 0.3781406953462310 0.3948121268249582  
0.4176757900432961 0.6018420463352273 0.3925928280550043  
0.5485021492858320 0.6215796084535714 0.3947315053107448  
0.6017704454505556 0.5824829896519884 0.4008557035340448  
0.4593723698061107 0.6181679179768652 0.3502155366421751  
0.4481620772286096 0.6782700546905149 0.3466095258117486  
0.4834524303767581 0.4783854601640209 0.3970047083960934  
0.4887630620270991 0.6926749831871107 0.4282627502623269  
0.5011408639531190 0.6327011931351705 0.4313657003761917  
0.6249687170350137 0.4950014801563846 0.4448157813306403  
0.6857808014033869 0.5013393892967747 0.4484015718001612  
0.5162132510076323 0.5214580080664303 0.3976375027112374  
0.6876701130322120 0.5462403800967390 0.3674614571479342  
0.6267547680913331 0.5408191670554842 0.3642735797388321  
0.4983726399650492 0.3679885499905983 0.4339585587378735  
0.5110627026450593 0.3079457537231553 0.4319753261733690  
0.3144625732333085 0.4518247317337849 0.3592855123536719  
0.5526891907375180 0.3205885125808727 0.3504932995176775  
0.5412344104373549 0.3807667142877634 0.3530025080231005  
0.3754199111386807 0.4587401208632901 0.3584185338717734  
0.1219850384150770 0.4635777760589148 0.4050306531980584  
0.5835820137813708 0.1304981453782670 0.3829509425823698  
0.7367185841925854 0.5203041779858617 0.3895662386246467  
0.7920861814097698 0.5229608656574252 0.4675904685079136  
0.8533945818003650 0.5229269999355106 0.4616460662545114  
0.8779042356463356 0.5352074366135585 0.4152984079634264  
0.8408825342316693 0.5469028268712534 0.3751474581933212  
0.7802542434563530 0.5460036067671662 0.3809166903136834  
0.5482545595607493 0.2671327338347078 0.4102910243007222  
0.5124346019324635 0.1990996591650565 0.3489439337031519  
0.5327597002594819 0.1412636715587589 0.3550083357858214  
0.5919884213581836 0.2347753821317214 0.4003618976042910  
0.6131874429655346 0.1775905257493397 0.4053601762237888  
0.2632066092382224 0.4744861347887770 0.3799788437253216  
0.2181959832361517 0.5059014139043068 0.3900147387272528  
0.1573589196610107 0.5075593981223151 0.3841026803412368  
0.2092189023521931 0.4175229728744129 0.4394302769451258  
0.1480785550478503 0.4180722690565565 0.4323453736711464  
0.4520104492867707 0.7329894015537300 0.4057189677014001  
0.4082758892491301 0.7651769044667961 0.3951965060238968  
0.3870519792796983 0.8224334017337862 0.3994545674894880  
0.4883637384363869 0.8000760135563543 0.3439751194466557  
0.4680545469565995 0.8580160592531531 0.3493801272244995  
0.4168847633257723 0.8691849918652529 0.3767568932187652  
0.6214722909857512 0.4511872779662491 0.4018069435182574  
0.3109650475339887 0.4969120498651701 0.4401154960377645  
0.3716551570697491 0.5273249424516181 0.4984261182778140  
0.3739711948326370 0.4832836531192055 0.54220446619963465  
0.5986013189997113 0.4141863024738576 0.5001729796858650  
0.4136829312230228 0.4014297550276586 0.5001575931483581  
0.4732473475014187 0.3720127264317045 0.4974076569513523  
0.4013933964727574 0.5865739525755279 0.4953725333651491  
0.5268762777011657 0.6288009318817439 0.4979190176819404  
0.5860818742971354 0.5994224114888466 0.5039180262469112  
0.4395391740460820 0.6104124681494709 0.4531527627697157  
0.4175712800611112 0.6675124636726505 0.4501902043154037  
0.4875651769105914 0.4762767096849320 0.4991843919675234  
0.4545807085626681 0.6876778843034556 0.5321762502913620  
0.4776767435700539 0.6309203890431900 0.5346691424307739  
0.6237028658052026 0.5170710638123149 0.5474864919252382  
0.6824915665020866 0.5337359299593817 0.5514347256687869  
0.5123505030592546 0.5245764093938983 0.4998179341208770  
0.6773199060403917 0.5786037787431640 0.4705991879161384  
0.6182179737612542 0.5628285196880773 0.4670365531742954  
0.5210299081777979 0.3704900340341384 0.5367679246883021  
0.5439391719996628 0.3135528155611925 0.5353113743781890  
0.3242699062919746 0.4224063778211529 0.4630850400388724  
0.5836485642282823 0.3324781110299518 0.4540151582813429  
0.5618886061446606 0.3897658462978869 0.4559689155259012  
0.3834093015918147 0.4386575292489173 0.4615722301985821  
0.1332845875883713 0.4025546024806635 0.5104345153997073  
0.6472701584821255 0.1512050963116970 0.4869997690632428  
0.7298670545966045 0.5609253061299069 0.4928910859796045  
0.7836180538447496 0.5734599555435401 0.5711235994857735  
0.8439655255753320 0.5845615304674524 0.5653250004875796  
0.8660199996156384 0.6008984521434193 0.5189777970385440  
0.8276597686957607 0.6054078090192874 0.4786862175879771

0.7681981513592715 0.5936206731015502 0.4843489279867412  
0.5882685228155919 0.2796813909398308 0.5140591488008406  
0.5629846523383059 0.2048377913271262 0.4552671688591999  
0.5936567918717494 0.1517515440578655 0.4613907823869517  
0.6377894813345421 0.2558422953847999 0.5024451291803349  
0.6692363406446564 0.2035305701156876 0.5073421783592039  
0.2706718516664480 0.4363402044665194 0.4842145150898332  
0.2208798104337789 0.4602450174324704 0.4943384244787969  
0.1605504948054800 0.4516101767618498 0.4889442704401765  
0.2273631567056869 0.3720650103530097 0.5442872653090171  
0.1669403001219941 0.3622653096579152 0.5376848257895960  
0.4113896039959441 0.7212401710959639 0.5097779545474297  
0.3625140678138905 0.7456608344373927 0.4983403159573211  
0.3319976750875865 0.7985554297937300 0.5029609285974427  
0.4374067792951665 0.7946750675556978 0.4498192001821584  
0.4076653615577746 0.8483535579038812 0.4556058928015028  
0.3545088689287404 0.8502004626747667 0.4818407814321657  
0.6281661307275630 0.4734137688815341 0.5044608284064723  
0.3152326233177749 0.4659545335426687 0.5441996979737391  
0.3680385593522177 0.5046174447478785 0.6029939610834306  
0.3783767685771134 0.4610402533525483 0.6467322056388765  
0.6111407056901074 0.4328828296419007 0.6042192131550094  
0.4312292952179536 0.38812511138990160 0.6044488875967169  
0.4949782155616507 0.3693386307355311 0.6016952240873107  
0.3868377233714864 0.5682014796175798 0.5998788608870236  
0.5032088181506735 0.6317174302610133 0.6017389487401742  
0.5666156281552900 0.6128811512450374 0.6075941966705026  
0.4204679129267239 0.5986087175269172 0.5572777951427599  
0.3894997843705873 0.6513662535112500 0.5541534361801820  
0.4913130308606468 0.4744840109926575 0.6034050591033967  
0.4224505519204337 0.6774650453044528 0.6361988626492170  
0.4545292674026077 0.6252626403911847 0.6388064271389942  
0.6172890672101569 0.5395088435945946 0.6519113784101593  
0.6724315428890302 0.5658883411858918 0.6556100451720041  
0.5065922654491741 0.5265703329159378 0.6041625539784005  
0.6605865277917744 0.6064937228424949 0.5736732817244166  
0.6048926479063589 0.5811257010386428 0.5704373534610304  
0.5430302921751710 0.3761572300142104 0.6409475521367286  
0.5757357132439829 0.3242386733388974 0.6392156044887497  
0.3394697581147005 0.3939270563701315 0.5669017555825052  
0.6105386668723278 0.3499931870457297 0.5576652916739250  
0.5789349834321029 0.4024818234812599 0.5598893407629008  
0.3949224642808108 0.4202120740399045 0.5654923731567296  
0.1558976708640211 0.3388647721629779 0.6141972125428778  
0.7016275627488694 0.1798563755629256 0.5902837922821580  
0.7149562120710030 0.5993000286163016 0.5964779954445798  
0.7654030957120480 0.6221329210956302 0.6745389172379470  
0.8231812748653643 0.6426696733704146 0.6686027414437018  
0.8424425771966532 0.6616418043467562 0.6220839038370950  
0.8040134234404320 0.6591705597429314 0.5817318100069397  
0.7472338074182193 0.6379679091813583 0.5874882604162051  
0.6247690602473452 0.2985185901025033 0.6174727219754965  
0.6108717820311182 0.2211640779960898 0.5581761030468300  
0.6487783700857901 0.1729641097980726 0.5642073900300117  
0.6771128903827544 0.2819189179677659 0.6062361465326116  
0.7156957323297389 0.2346085656182903 0.6110357179622166  
0.2841975382144738 0.3983402605993677 0.5884948332114727  
0.2313017438898508 0.4121726353213624 0.5993693723961375  
0.1735382039360155 0.3927920552035468 0.5938438112651084  
0.2541909608605075 0.3251792555804354 0.6473521465232768  
0.1965240354080105 0.3046886350590272 0.6406150033815007  
0.3746916684693347 0.7035765916726002 0.6137814814002660  
0.3225051378735759 0.7201817799091303 0.6031304417818363  
0.2842708613374615 0.7677179186295024 0.6080058535888891  
0.3879744308666414 0.7798922638509874 0.5534140261691514  
0.3504155829924280 0.8283187233073500 0.5594811586417553  
0.2981010249161115 0.8220906825195063 0.5864367363016370  
0.6297582670278967 0.4964460193769002 0.6085024360956869  
0.3235268613929257 0.4337488604399791 0.6486014291224309  
0.3695736838375069 0.4815256573149874 0.7081493350501553  
0.3872172275011230 0.4400534038556855 0.7514740502774893  
0.6216268827866182 0.4544221311124095 0.7092862671933767  
0.4526775610619623 0.3781703062387577 0.7090849140432869  
0.5187231078563209 0.3712781242043685 0.7060260500402039  
0.3768453268148289 0.5474373838328659 0.7050358499002602  
0.4799127611896476 0.6306231624663311 0.7062552698531211  
0.5456860109238639 0.6236063931632524 0.7120452972861698

0.4048817804399154 0.5829491693324133 0.6619414765380721  
0.3649268608066235 0.6292544322502469 0.6583909594739017  
0.4960431913385548 0.4740171268806875 0.7085216105072909  
0.3921545483503300 0.6614654205343804 0.7403755143403028  
0.4329307349869791 0.6157843605048285 0.7435093449254847  
0.6093156858496324 0.5607782030774012 0.7562218340721094  
0.6587939512996773 0.5967332292220260 0.7594022796611235  
0.5023018670403742 0.5278351310888766 0.7092211341391689  
0.6389929769418051 0.6339678412007277 0.6774350223950175  
0.5887289257443625 0.5990075246548965 0.6747412858988812  
0.5649283816590510 0.3861841114701759 0.7451976971226174  
0.6061233607435043 0.3407384305100045 0.7427132790736026  
0.3612244208100847 0.3679577753001544 0.6710269930097144  
0.6351530087596972 0.3733475640089064 0.6612763565655682  
0.5947901196893937 0.4194268843794912 0.6641998030250424  
0.4112091503133374 0.4035628846898565 0.6700794698522750  
0.1890861516294637 0.2822725589815719 0.7168640482271122  
0.7566752991792733 0.2232788192971119 0.6936213796307785  
0.6940690446008031 0.6368193838312349 0.6999403693167419  
0.7402341554808582 0.6677572370551680 0.7779294480392811  
0.7937336443923275 0.6977182643646994 0.7719162090931231  
0.8095087709686112 0.7195227017205276 0.7253513025791567  
0.7719483032602611 0.7106191099689910 0.6850570034890344  
0.7194891408342056 0.6802874270735871 0.6909079946713782  
0.6587680323344931 0.3244942093999194 0.7205953805927006  
0.6595493099074391 0.2461048396737702 0.6616231992761802  
0.7059727191540640 0.2061182269019838 0.6678585642835652  
0.7133273353383247 0.3190714366235333 0.7086751212193270  
0.7601976689310969 0.2799807436082098 0.7137936890423240  
0.3061517977098732 0.3619755534926495 0.6922700248986430  
0.2510791822230550 0.3675911412488705 0.7035261023501033  
0.1973917669933407 0.3388945039380246 0.6974882131691746  
0.2882895868462417 0.2845243084474234 0.7500602617593582  
0.2349210388064787 0.2547128445461392 0.7426931613436996  
0.3402246957464593 0.6778475311319357 0.7176532148486459  
0.2858118872011397 0.6836293201107654 0.7057136577879864  
0.2389675411104431 0.7228087553321620 0.7104391416302962  
0.3399022218183073 0.7561383665948594 0.6584145299024587  
0.2934725582334149 0.7962242919010708 0.6642307766054937  
0.2426238368401291 0.7793321908525392 0.6899020594565702  
0.6287503778514127 0.5202651118095739 0.7135081608173997  
0.3380955467814384 0.4034643469628235 0.7529223907441507  
0.3764814596867813 0.4555890404182681 0.8184955721399783  
0.4117657920781590 0.4106931607898448 0.8654212342778108  
0.6287157759995121 0.4778777606288726 0.8201114276794985  
0.4767186673323489 0.3710142119780371 0.8192111051846115  
0.5431894597514902 0.3758872550767807 0.8168811890147910  
0.3700565322198405 0.5218258149958587 0.8152611110681035  
0.4556374658338526 0.6238966689475272 0.8186831257367186  
0.5218495009454964 0.6286020103021662 0.8242242673336856  
0.3959845065120904 0.5669014557093373 0.7706272194961620  
0.3504739223569899 0.6072281711542019 0.7644909819651897  
0.5030775984859400 0.4730005347339651 0.8198394471466542  
0.3605048458554241 0.6362768630886849 0.8501406253792483  
0.4064200920581142 0.5963318620096899 0.8559014453482806  
0.5875842552215668 0.5866719245084682 0.8704499971881586  
0.6310957482364675 0.6299700088419133 0.8728465345492441  
0.4955900200268800 0.5266758485640914 0.8205380243073536  
0.6204535483162861 0.6467620925079446 0.7850967411717090  
0.5758409274517410 0.6049615008374648 0.7831571277728470  
0.5908831014548521 0.4026806952655502 0.8575457806476124  
0.6370430131982017 0.3628788598597967 0.8524709397707907  
0.3788034559314485 0.3532505929360537 0.7787727205021397  
0.6504610518586571 0.3937954895180413 0.7676183887781279  
0.6046392463416329 0.4339450580058590 0.7730582280387208  
0.4224190435254725 0.3962591502474102 0.7775310206375576  
0.2289932168104813 0.2341345417830377 0.8280883518701885  
0.7904511306383244 0.2568953209776160 0.8029059235591834  
0.6634238240444660 0.6694340757100882 0.8088413231502440  
0.7057476408408161 0.7116180899099938 0.8864513410724106  
0.7489458639318834 0.7552362226615302 0.8791756838368844  
0.7615958472533992 0.7747464022181599 0.8312482176907616  
0.7316688908801688 0.7500444415306015 0.7910754980356133  
0.6898232937519628 0.7070294519687075 0.7981421394365233  
0.6836243956191255 0.3464353836632467 0.8265208017519998  
0.6968551622200576 0.2760462897535692 0.7629000070443847  
0.7454379933871106 0.2392421309476779 0.7707830514086307

0.7380404695235249 0.3475375361473003 0.8195695319621338  
0.7865631831601709 0.3112388503512303 0.8271273115630767  
0.3360607819536162 0.3287453709075536 0.8028813037203717  
0.2856699366763936 0.3187021889946328 0.8018329260059560  
0.2376337588702204 0.2817917564278394 0.7960567125609505  
0.3171087446509712 0.2623898145318088 0.8729955274090869  
0.2690705292368948 0.2240008808242650 0.8664930404574221  
0.3154479651644239 0.6535990023524426 0.8234641068676095  
0.2616333603411280 0.6531888867610699 0.8171784596093801  
0.2135889356854095 0.6898534662768808 0.8252806380988540  
0.3022268572725175 0.7240932772064078 0.7596812025412717  
0.2540198673584117 0.7612181983080952 0.7680418752124070  
0.2095797495403177 0.7441144593845974 0.8009276827990833  
0.6221598032632690 0.5439704953980370 0.8247716737398837  
0.3695176987754996 0.3662395371358903 0.867102991964956  
0.2787063130745648 0.5489350407316377 0.1905141245335812  
0.5398887520536693 0.7232288877593233 0.1711658858120496  
0.5285375984917402 0.4578963820563384 0.1817350488164978  
0.4566539778307871 0.4729698584182795 0.1791042790067019  
0.5460901536960300 0.5273080288872749 0.1806044480224307  
0.4741634322620064 0.5423291862731384 0.1790064690962040  
0.7230134971477594 0.4504927430352335 0.1998666596039416  
0.4600737921669152 0.2770997095027213 0.1766606451504028  
0.2736351553469885 0.5102019137200779 0.2951249648553247  
0.4994497491935107 0.7272679108144235 0.2820613119756895  
0.5360531591493823 0.4639485388635204 0.2926328240238474  
0.4634046930642409 0.4633185314020580 0.2902889518370109  
0.5384906917645029 0.5364295012521628 0.2915871590721615  
0.4658709095959521 0.5358574428493389 0.2893037554571416  
0.7277199591650118 0.4892445848961454 0.3045943038925090  
0.5046586850459888 0.2722843292463775 0.2871691030504153  
0.2738023599840291 0.4705985982520489 0.3990365313752305  
0.4593722824764644 0.7235063922628109 0.3869754295240965  
0.5403995766008823 0.4701598918532439 0.3985054900154958  
0.4685973206829138 0.4578800135091302 0.3968388200923987  
0.5310881137210504 0.5419530797780535 0.3977407667454220  
0.4592559987706182 0.5296729187248275 0.3959411309848430  
0.7258288002574841 0.5260342545379697 0.4081755280070802  
0.5410058538341396 0.2762841559505125 0.3913928513256160  
0.2818661245798141 0.4345934341484551 0.5032661212717132  
0.4204227248471083 0.7134445803590447 0.4909914792390963  
0.5450449032732011 0.4781078161000611 0.5008299729914131  
0.4764493205216979 0.4535218665748367 0.4990067190603635  
0.5234874332445570 0.5473237140745979 0.5000534650879842  
0.4549021198893102 0.5227092241143021 0.4983206154523317  
0.7180424566044588 0.5649025676469620 0.5114182953095012  
0.5793965614248605 0.2871512801838548 0.4951123743874549  
0.2958765892307326 0.3978390069499408 0.6073821037339876  
0.3846792855484584 0.6972439122161024 0.5949618939451606  
0.5471032519837365 0.4862866576033633 0.6050399812986574  
0.4841386246044371 0.4501977846498180 0.6032562415947875  
0.5137782579166528 0.5508595688729123 0.6042901900759233  
0.4507839792432217 0.5147864032635324 0.6026731745228187  
0.7025597708181308 0.6013944835934818 0.6149593534073432  
0.6146014398229783 0.3044489492520185 0.5986167531709172  
0.3173795665510634 0.3637275382488277 0.7112945216033858  
0.3515454585135748 0.6736410723625952 0.6989752078893491  
0.5491779138888425 0.4956940876181109 0.7100407731402600  
0.4934777761199352 0.4488208485672755 0.7082869659702410  
0.5049025117306282 0.5530290869370744 0.7092760989499263  
0.4492225620549246 0.5061765067329049 0.7078700579726039  
0.6816249558704498 0.6367321064614657 0.7184738849512153  
0.6477022852474725 0.3288525567088809 0.7018287867898599  
0.3454982290415027 0.3333106299545854 0.8221469783535055  
0.3258721494437216 0.6472378707603493 0.8050229764681074  
0.5493603424298924 0.5035280944592034 0.8213795902271377  
0.5045363651264886 0.4477130386939498 0.8195676099748628  
0.4941209153480364 0.5519617136135178 0.8210056763648643  
0.4493159329399700 0.4961406739442091 0.8187516313838433  
0.6547350564623303 0.6644850887912838 0.8282796379045189  
0.6734228004407786 0.3529398444779241 0.8080239037266791  
0.7328152604400604 0.4602877865609320 0.2462125421843323  
0.4407402977818692 0.2672754128408115 0.1325322695687643  
0.2660038198588352 0.5349356907888037 0.2356211743471228  
0.5501294373490879 0.7327413126681032 0.1248978305176292  
0.7381411592113416 0.5007003174283954 0.3504651175385980  
0.4849780230917835 0.2618612880716866 0.2431801720063315



|                    |                    |                    |
|--------------------|--------------------|--------------------|
| 0.2619220454896850 | 0.4903960535870199 | 0.3388069376634815 |
| 0.5202784706772707 | 0.7372539374612993 | 0.2383502731345362 |
| 0.7343880311251783 | 0.5406313008494512 | 0.4536840593887118 |
| 0.5246810287038843 | 0.2626832923375362 | 0.3471244268154318 |
| 0.2652096575010017 | 0.4503477434621881 | 0.4430786129662628 |
| 0.4760473923743713 | 0.7364881279752926 | 0.3426418174516132 |
| 0.7237483307828201 | 0.5804769323602107 | 0.5570180468517969 |
| 0.5647826614927954 | 0.2699989526392155 | 0.4512586177916256 |
| 0.2768362232119020 | 0.4140801240887159 | 0.5476121742272267 |
| 0.4354165255870556 | 0.7298476798761742 | 0.4470287419095671 |
| 0.7050519119899388 | 0.6192375689763899 | 0.6601848915476713 |
| 0.6029193467443678 | 0.2855014896354458 | 0.5546817455562110 |
| 0.2955324040827803 | 0.3750718901272238 | 0.6511468004702317 |
| 0.3959271955901481 | 0.7154820383119316 | 0.5507261031454649 |
| 0.6811546357966677 | 0.6548672101389726 | 0.7636890778568479 |
| 0.6394437746109848 | 0.3081880440097923 | 0.6578844212207855 |
| 0.3200971653081556 | 0.3413395126225008 | 0.7552084913514218 |
| 0.3601445123627081 | 0.6943440557704721 | 0.6550778111895631 |
| 0.6612247177053103 | 0.6754976272586891 | 0.8747112686785449 |
| 0.6704634030878829 | 0.3356964658589904 | 0.7625098508594207 |
| 0.3458865608499928 | 0.3157282581382413 | 0.8675464942359608 |
| 0.3289706973350397 | 0.6648427840540790 | 0.7595968019868593 |
